# Supplementary material for: Epigenomic analysis detects aberrant super-enhancer DNA methylation in human cancer
Source: PubMed Central journal article supplement (PMC4728783; doi:10.1186/s13059-016-0879-2), 2016-01-26
Supplement: 13059_2016_879_MOESM1_ESM.pdf [file 13059_2016_879_MOESM1_ESM.pdf]

## **SUPPLEMENTARY INFORMATION**

SUPPLEMENTARY METHODS

SUPPLEMENTARY FIGURES 1-19

SUPPLEMENTARY TABLES 1-9

## SUPPLEMENTARY METHODS

**Functional enrichment analysis.** Gene Ontology (GO) enrichment analysis was performed using the Database for Annotation, Visualization and Integrated Discovery (DAVID; v6.7) [1, 2]. The results were corrected for multiple hypotheses testing using the Bonferroni p-value adjustment method.

### ChIA-PET Data Integration

We retrieved MCF7 Pol2 ChIA-PET data from [3] (4 replicates) and kept anchors that were present in >1 replicate and where any of the anchor pairs overlapped a gene promoter (consensus anchor regions). Then, SEs not overlapping promoters were assigned to consensus ChIA-PET anchor regions. Finally, we assessed the association between SE enhancer DNA methylation and target gene expression with a Spearman's correlation test using TCGA data from normal breast samples [4].

### 5-Hydroxy DNA Methylation Profiling

Genomic DNA was quantified using Qubit fluorometer (Qubit® dsDNA BR Assay Kit). 4 µg of DNA in 150µL were sheared using g-TUBE (Covaris, Inc.) to 10kbp fragments, by centrifugation at RT for 1 min at 6,000 rpm (Eppendorf 5424). g-TUBEs were then inverted in the centrifuge, and centrifuged again for 1 min at 6,000 rpm (RT). Sheared DNA was recovered from the screw-cap, and processed through GeneJET purification kit to reduce volume from 150µL to 40µL. GeneJET columns were prepared with 50 mM NaOH twice, followed by Binding Buffer. Once GeneJET columns were prepared, 150µL of sheared DNA were processed on GeneJET columns, followed by 3 washes with 80% acetonitrile. DNA was recovered from the columns using 40µL of pre-warmed ultra-pure water (65°C). Concentrated sheared DNA was then quantified using Qubit, and all samples were spiked-in with 0.5% (w/w) of Digestion Control according to the quantification of the DNA.

Each sample was divided in two aliquots of 20µL each, and were processed following TrueMethyl 24 Kit User Guide (Version 3.1 July 2013, CEGX, UK). The aliquot intended for the oxidative bisulfite conversion (OxBs), underwent a pre-cleaning step, using BioRad P6 Micro-Bio spin columns to remove possible contaminants that could interfere the oxidation reaction. Then both aliquots were denatured for 30 min at 37°C with Denaturing Solution provided in the kit, and immediately kept on ice. To each aliquot intended for OxBs, 1µL of Oxidant Solution was added, while the aliquots intended for normal bisulfite conversion (Bs) 1µL of water was added instead. Samples

were incubated for 30 min at 40°C, and centrifuge 10 min at 14,000 x g, to remove precipitates. Supernatant was then used for bisulfite conversion process by adding 5µL of Bisulfite Additive and 170µL of Bisulfite Reagent, and incubated 2 cycles in a PCR machine (5 min @ 95°C; 20 min @ 60°C; 5 min @ 95°C; 40 min @ 60°C; 5 min @ 95°C; 165 min @ 60°C).

Bisulfite converted DNA was clean-up by pelleting precipitated salts, then subjected to a desulfonation reaction and finally clean-up again using Amicon Ultra 0.5 30kDa filter columns as indicated on the protocol with the modification on step 4.15 to increase the centrifugation time to 65 min, as indicated on TrueMethyl workflow for 450k Analysis (CEGX Version 1.1 December 2013). Both aliquots were quantified using Qubit ssDNA Assay Kit and 160 ng of bisulfite converted DNA were processed following standard protocol for HumanMethylation450 microarray.

Raw methylation data (idats) were background corrected and normalized using Methylation module (v1.9.0) of Illumina GenomeStudio software (V2011.1) in order to compute  $\beta$ -values. Hydroxymethylation levels were computed by subtracting  $\beta$ -values resulting from OxBs aliquot (5hmC+5mC) to the  $\beta$ -values from Bs aliquot (5mC).

### **Transcription Factor Occupancy Analysis**

We used the ENCODE transcription factor binding site (TFBS) data available at UCSC, comprising 91 cell lines and 188 antibodies [5]. Given a sample and its corresponding super-enhancer (SE), we extended each SE 50 % of its size on each direction and split the resulting regions in 60 windows according to the relative distance to the center of the SE. We then computed the average methylation and the proportion covered by any of the TFBS (occupancy) among the window for each window and SE. As the distribution of both methylation and TFBS occupancy was bimodal, we categorized these values using a cutoff of 50 % and performed a Fisher's exact test separately for the windows inside the SE.

### **Transcription Factor Enrichment Analysis**

The statistically over-represented transcription factor binding sites (TFBS) in a set of sequences were compared with a background set using the CLOVER algorithm (Cis-eLement OVERrepresentation) [6] employing the following procedure: the JASPAR 2009 CORE collection of TFBS pattern matrices [7] were downloaded and converted to CLOVER format using PERL scripts, then the subset of sequences to search for over-represented TFBS and the background of sequences with which to compare them were specified. Specifically, we defined the hypomethylated colon cancer-related SE regions as the target set and the entire set of colon cancer-related SE loci as the background

set. CLOVER compares each motif in turn with the sequence set and calculates a raw score that indicates how well represented the motif is in the subset. CLOVER also determines the statistical significance of the raw scores. Therefore, for the background set, CLOVER repeatedly extracts random fragments matched by length to the target subset of sequences, and calculates raw scores for these fragments. The proportion of times that the raw score of a fragment set exceeds or equals the raw score of the target set, is taken as the probability,  $P$ , that the motif's presence in the target set can be explained by chance alone. For each motif, a separate probability is calculated for each background file. Values of  $P < 0.05$  were considered to be statistically significant.

### **Chromatin Immunoprecipitation (ChIP) to Assess FOXQ1 Occupancy at Binding Sites and Super-enhancers Regions**

Previous to ChIP, FOXQ1 monoexonic cDNA (lacking UTR regions) was amplified from HCT116 genomic DNA using specific primers with end adaptors containing EcoRI and BamH1 sequences, a Kozak sequence, and the N-terminal flag-tag (DYKDDDDK). The PCR products were cloned in bacteria, polymorphisms and mutations verified by Sanger-sequencing, and ligated into plvx-IRES-zsgreen plasmid from Clontech using EcoRI and BamH1 restriction enzymes (refseq: NM\_033260). 10  $\mu$ g of each plasmid were mixed with 7.5  $\mu$ g of PS-PAX2 and 2.5  $\mu$ g of PMD2.G plasmid in 1 ml jetPRIME buffer and 50  $\mu$ l of jetPRIME reagent were added (114-15, Polyplus transfection). After 20 min of RT incubation, the mix was diluted over a 10 cm disk containing 10 ml of DMEM and 293T cells at 80% confluence. After 48 h, medium containing viruses was recovered and 45- $\mu$ m filtered. 3 ml of this medium plus polybrene (8  $\mu$ M) was added to six-well plates containing the host cells at 80% confluence. After 48-72 h, cells were expanded and green positive cells were isolated by flow cytometry. Ectopic expression of FOXQ1 protein was evaluated by western blot using anti-Flag-HRP antibody (A8592, Sigma).

For ChIP, fresh cultures ( $1.5-2.0 \times 10^7$  cells) were cross-linked with 1% formaldehyde for 8 min and the reaction was blocked by adding glycine to a final concentration of 0.125 M. After washing twice with ice-cold PBS, cell pellets were resuspended in 1ml of Farnham lysis buffer (PIPES 5mM pH8.0, KCl 85mM, NP-40 0.5%) supplemented with protease inhibitor cocktail (Complete EDTA-free, Roche) and kept on ice for 10 min. The nuclear pellet was then resuspended in 1ml RIPA buffer (Tris-HCl 50 mM pH8.0, EDTA 20 mM, SDS 1%) supplemented with protease inhibitor cocktail (Complete EDTA-free, Roche) and kept on ice for 10 min. Samples were subsequently sonicated with S220 Covaris ultrasonicator for 18 min (peak incident power: 75W, duty factor: 10%, cycles per burst: 200). The chromatin size of the fragments obtained was 250-

500 bp. Samples were diluted with dilution buffer (SDS 0.01%, Triton X-100 1.1%, EDTA 1.2 mM, NaCl 165 mM, Tris-HCl 16.7 mM pH 8.1). Magnetic beads were used for pre-clearing diluted chromatin (overnight at 4°C) and for incubation with anti-Flag antibody (F1804, Sigma). Non-related mouse IgG antibody (12-371B, Millipore) was used as a negative control. The bead-antibody complexes were then incubated with pre-cleared chromatin for 8 h at 4°C with rotation. The immune complexes were washed at 4°C in rotation: twice with low-salt buffer (Tris-HCl 50 mM pH 8.0, NaCl 150 mM, SDS 0.1%, NP-40 1%, EDTA 1 mM, deoxycholate Na 0.5%), twice with high-salt buffer (Tris-HCl 50 mM pH 8.0, NaCl 500 mM, SDS 0.1%, NP-40 1%, EDTA 1 mM, deoxycholate Na 0.5%), twice with LiCl buffer (Tris-HCl 50 mM pH 8.0, LiCl 250 mM, SDS 0.1%, NP-40 1%, EDTA 1 mM, deoxycholate Na 0.5%) and once with TE Buffer (Tris-HCl 10 mM pH 8.0, EDTA 0.25 mM), 2 min each. Cross-linked chromatin was then eluted from the magnetic beads by adding elution buffer (NaHCO<sub>3</sub> 100 mM, SDS 1%). Samples were de-crosslinked overnight at 65°C and incubated with proteinase K at 50 µg/ml final concentration for 1 h. Finally, DNA was purified with a PCR purification kit (28106, Qiagen). The following SybrGreen gene-specific primer pairs were used: MYC forward, 5'- GGATTTTTCCAATGGACACG-3', MYC reverse: 5'- AAACAAAGCCAGACCTCAGC-3'; GPR forward: 5'- TCTTCTCATTCTGGGTCCACT-3', GPR reverse: 5'- GGAAGTCAAAGATTCTCAAGCA-3'; RNF forward: 5'- GCTTCCGTTTCAGAAAGCCA-3', RNF reverse: 5'- TCCTCTTCTCTGCCCAATCA-3'. Primer amplification efficiency and primer dimer formation was tested previously to ChIP. Western blot from ChIP pull downs were run to evaluate the presence of FOXQ1. ChIP data are presented as percentage of input ± SEM, n ≥ 3. Significance of Student's *t*-tests (equal variance, one tail) is shown.

### **Experimental Validation of Transcription Factor Effects**

For qRT-PCR experiments, total RNA from the colorectal cancer cell line SW1116 transfected with shRNAs against the respective transcription factors or a scrambled control was extracted using MAXwell (Promega) and retro-transcribed using the ThermoScript™ RT-PCR System (Invitrogen). Gene expression was determined by quantitative real-time PCR using SYBR Green (Applied Biosystems) according to the manufacturer's recommendations. Target gene expression levels were normalized to two housekeeping genes (PPIA and B2M).

Cell proliferation was determined for the colorectal cancer cell line SW1116 transfected with shRNAs against the respective transcription factors or a scrambled control by a 3-(4,5-dimethylthiazol-2-yl)-2,5-diphenyltetrazolium bromide (MTT) assay. The cell viability was quantified over 6 days, staining the cells with MTT for 3 hours and

blocking the reaction adding lysis buffer (HCl 20 mM, acetic acid 2.5%, SDS 20%, dimethylformamide 50%, pH 4.7). Measurements were performed at 560nm after overnight incubation at 37°C.

### **Super-enhancer disruption with JQ1**

After overnight incubation, the colorectal cancer cell lines HCT116 and SW1116 were treated with a 2-fold dilution series of JQ1 (A1910, Apexbio) or vehicle alone (DMSO at final concentration 0.2%). After 48h, cell viability was determined by a 3-(4,5-dimethylthiazol-2-yl)-2,5-diphenyltetrazolium bromide (MTT) assay. To determine sublethal concentrations, we calculate the EC<sub>50</sub> for JQ1 for both cell lines using the mean of four replicates in respect to vehicle treated cells. Viability curves were generated using a sigmoidal dose-response model with variable slope (GraphPad Prism 5 software) from which the EC<sub>50</sub> values were extracted. To investigate the effect of JQ1 treatment at the DNA methylation level, HCT116 and SW1116 cells were treated with a sub-lethal JQ1 concentration (10 µM) for 48h. After 24h, culture medium and drug were renewed and cells were harvested 24h later. RNA and DNA were extracted to evaluate mRNA expression level changes of *MYC*, *RNF43* and *GPRC5A* and for DNA methylation analysis on the Infinium HumanMethylation450 BeadChip, respectively.

### **SUPPLEMENTARY REFERENCES**

1. Huang DW, Sherman BT, Lempicki RA: Systematic and integrative analysis of large gene lists using DAVID bioinformatics resources. *Nat Protoc* 2009, 4:44–57.
2. Huang DW, Sherman BT, Lempicki RA: Bioinformatics enrichment tools: paths toward the comprehensive functional analysis of large gene lists. *Nucleic Acids Res* 2009, 37:1–13.
3. Li G, Ruan X, Auerbach RK, Sandhu KS, Zheng M, Wang P, Poh HM, Goh Y, Lim J, Zhang J, Sim HS, Peh SQ, Mulawadi FH, Ong CT, Orlov YL, Hong S, Zhang Z, Landt S, Raha D, Euskirchen G, Wei C-L, Ge W, Wang H, Davis C, Fisher-Aylor KI, Mortazavi A, Gerstein M, Gingeras T, Wold B, Sun Y, et al.: Extensive promoter-centered chromatin interactions provide a topological basis for transcription regulation. *Cell* 2012, 148:84–98.
4. Cancer Genome Atlas Network: Comprehensive molecular portraits of human breast tumours. *Nature* 2012, 490:61–70.
5. Consortium TEP: An integrated encyclopedia of DNA elements in the human genome. *Nature* 2012, 489:57–74.

6. Frith MC, Fu Y, Yu L, Chen J-F, Hansen U, Weng Z: Detection of functional DNA motifs via statistical over-representation. *Nucleic Acids Res* 2004, 32:1372–1381.
7. Sandelin A, Alkema W, Engström P, Wasserman WW, Lenhard B: JASPAR: an open-access database for eukaryotic transcription factor binding profiles. *Nucleic Acids Res* 2004, 32(Database issue):D91–94.
8. Hnisz D, Abraham BJ, Lee TI, Lau A, Saint-André V, Sigova AA, Hoke HA, Young RA: Super-Enhancers in the Control of Cell Identity and Disease. *Cell* 2013.
9. Cancer Genome Atlas Research Network: Comprehensive molecular profiling of lung adenocarcinoma. *Nature* 2014, 511:543–550.
10. Cancer Genome Atlas Network: Comprehensive molecular characterization of human colon and rectal cancer. *Nature* 2012, 487:330–337.

## SUPPLEMENTARY FIGURES

**Figure S1.** Genome-wide CpG methylation levels of 13 samples determined by whole genome bisulfite shotgun sequencing (WGBS). Displayed are CpG methylation levels at promoters (red), exons (blue), introns (green) and intergenic regions (purple). Samples are organized according to their tissue types.

**Figure S2.** DNA methylation profiles of super-enhancer regions derived from the displayed normal tissues [8] determined by whole genome bisulfite shotgun sequencing (WGBS). Scaled DNA methylation profile of 1,091 super-enhancers detected in normal breast (**a**) 1,237 in normal lung (**b**), 1,012 in normal colon (**c**), 1,060 in normal brain (**d**) tissue and 675 in normal CD19+ cells (**e**). DNA methylation levels in equally sized windows inside super-enhancers (black bar) and flanking sequences (grey bar) are shown. Each horizontal line represents a single super-enhancer ordered by average DNA methylation levels (0%, green; 100%, red). Super-enhancers are grouped according to their average DNA methylation levels (red, <25%; blue, <50%; green, <75%; purple, <100%).

**Figure S3.** DNA methylation profiles of super-enhancer regions reveal a specific epigenetic profile. (**a**) Scaled DNA methylation profiles of a random set of 1,091 traditional enhancers (determined by H3K27ac in Human Mammary Epithelial Cells, HMECs [8]) in normal breast tissue. Each enhancer is represented by a single line (blue) and smoothed DNA methylation levels inside the enhancer (black bar) and equally sized flanking sequences (grey bar) are displayed. (**b**) DNA methylation levels of a random set of 1,091 traditional enhancers (determined by H3K27ac in Human Mammary Epithelial Cells, HMECs [8]) in normal breast tissue in equally sized windows (0%, green; 100%, red). Each horizontal line represents a single enhancer, ordered by average DNA methylation levels. Enhancers are grouped according to their average DNA methylation levels (red, <25%; blue, <50%; green, <75%; purple, <100%). (**c**) Transcription factor (TF) occupancy at scaled 1,091 breast super-enhancers (TF determined in 91 cell lines [5]) in equally sized windows. Each horizontal line represents a single super-enhancer, ordered by previous defined average DNA methylation levels (Figure S1). The proportion of the windows covered by TFs is color-coded (100% TF occupancy, black; no TF binding detected, white). (**d**) Correlation analysis of DNA methylation levels and TF occupancy in scaled 1,091



breast super-enhancer regions and equally sized windows. The density of windows is displayed gradiently (high, red; low, blue).

**Figure S4.** DNA methylation profiles of super-enhancer regions derived from normal tissues that display tissue-specific DNA methylation patterns. **(a)** DNA methylation levels of super-enhancers determined by WGBS are displayed for related and foreign tissue contexts. Scaled DNA methylation profiles of normal brain, CD19+, breast, colon and lung tissues in equally sized windows inside super-enhancers and flanking sequences are shown. Each horizontal line represents a single super-enhancer ordered by average DNA methylation levels of the specific tissues (0%, green; 100%, red). **(b)** Enrichment analysis of tissue-specific super-enhancers located in promoter regions compared to non-specific super-enhancer locations. Significant enrichments are indicated (\*,  $p < 0.001$ ; Fisher's exact test). **(c)** Average DNA methylation differences between outside and inside super-enhancer regions (points) and their corresponding 95% CIs (segments). Each panel corresponds to a set of normal tissue-derived super-enhancers and normal tissue samples are color-coded. **(d)** Hierarchical clustering of DNA methylation levels in tissue-specific super-enhancers (rows) of normal breast ( $n=20$ ), normal lung ( $n=26$ ), normal colon ( $n=18$ ), normal brain ( $n=9$ ) tissues and sorted CD19+ cells ( $n=5$ ), analyzed using the Human DNA methylation BeadChip. Average DNA methylation levels of probes ( $\geq 5$ ) located in hypomethylated regions within tissue-specific super-enhancers are displayed (0%, white; 100%, blue).

**Figure S5.** DNA methylation profiles of the brain-specific super-enhancer region associated with *QKI* **(a)** and the CD19+ specific region related to *LYL1* **(b)**. Smoothed (colored line) and raw (colored bars) CpG methylation levels are indicated for normal breast (red), normal brain (orange), normal lung (blue), normal colon (green) and sorted CD19+ (purple) cells. Hypomethylated regions (HMRs, colored bars) and super-enhancers (black bar) are indicated. The respective transcription start sites are highlighted (broken lines).

**Figure S6.** Hypomethylation level at the H3K27ac peak was independent of CpG density. CpG density of super-enhancers (x-axis) and the associated H3K27ac peak signal (y-axis) in 50-bp windows. Super-enhancer windows are split into high ( $>66\%$ , red) and low ( $<33\%$ , blue) DNA methylation levels. The significant differences of peak signals between high and low DNA methylation levels in super-enhancer windows were assessed with a multivariate linear model, adjusting for CpG density ( $p < 0.001$ ).

**Figure S7.** Super-enhancer DNA methylation level correlate with gene expression of the nearest gene. **(a)** Correlation analysis of enhancer HMR coverage levels and gene expression of the closest target gene. Enhancers are split in traditional enhancers (H3K27ac, red) and super-enhancer (blue) and *cis*-acting (no promoter overlap, upper panel) and promoter overlapping (lower panel). Expression data was log transformed and significances of a Spearman's correlation test are indicated. **(b)** Correlation analysis of enhancer HMR coverage levels and gene expression considering the enhancer size. Enhancers are split in short (red, 355-1,512 bp), tall (blue, 1,513-2,931 bp), grande (green, 2,932-58,999 bp) and super-enhancers (purple, 2,932-119,310 bp). Expression data was log transformed and significances of a Spearman's correlation test are indicated. **(c)** Correlation analysis of HMR coverage in *cis*-acting (no promoter overlap) super-enhancer regions and the expression of putative target genes defined by ChIA-PET analysis of polymerase II binding in MCF7 cells [3]. Expression data was log transformed and significances of a Spearman's correlation test are indicated.

**Figure S8.** Cancer-specific alterations in DNA methylation within super-enhancer regions determined using WGBS. **(a)** Super-enhancers of normal tissue gaining DNA methylation in a cancer context. Difference in DNA methylation levels (coverage of hypomethylated regions, HMRs) between cancer (n=8) and normal (n=5) samples paired within their respective tissue context (y axis). HMR coverage of normal tissues is indicated (x axis) and one plot per normal-tumor pair is displayed. **(b)** DNA methylation levels (coverage of hypomethylated regions, HMRs) of hypomethylated super-enhancers and the indicated cancer samples ( $\delta$  HMR occupancy >25%) inside (red) and flanking (black) the super-enhancer regions.

**Figure S9.** Absence of 5-hydroxy CpG methylation (5-hmC) at hypermethylated super-enhancer loci in cancer samples. We compared the methylation values obtained from bisulfite treated cancer samples against oxidative bisulfite treated samples to assess 5-hmC levels and to distinguish between 5-hmC (red) and 5-mC (blue) levels. Significant contribution of the 5-hmC was excluded for CpG sites (450K probes) in hypermethylated super-enhancer regions within their respective cancer samples (Table S5) comparing 5-hmC and 5-mC levels (paired one tailed Wilcoxon test).

**Figure S10.** Association between DNA methylation levels of hypermethylated super-enhancers and gene expression of target genes. **(a,b)** Differential HMR coverage (x-axis, WGBS) and target gene expression (y-axis) are displayed, comparing normal lung samples and the primary lung adenocarcinoma (H1437, **a**) and lung squamous cell

carcinoma (H157, **b**) cancer cell lines. Significance of the linear regression model is indicated. (**c,d**) Associations of hypermethylated super-enhancers and target gene expression using primary lung adenocarcinoma (**c**) and lung squamous cell carcinoma (**d**) samples (TCGA). Differential HMR coverage (x-axis, WGBS) and target gene expression (y-axis, RNAseq, scaled log expression) are shown, comparing matched normal lung and primary carcinoma samples. Significances of Spearman's correlation test are indicated. (**e**) Differential HMR coverage (x-axis, WGBS) and target gene expression (y-axis) are displayed, comparing normal brain (white matter) samples and the glioblastoma cell line. Significance of a Spearman's correlation test is indicated.

**Figure S11.** (**a**) Recurrently affected genes associated with hypermethylated super-enhancers in cancer tissue. Target genes of different samples within tissue types were merged with respect to the origin of the tumor. (**b,c**) Hierarchical clustering of CpG methylation levels (HumanMethylation450 BeadChip) within the super-enhancer regions associated with breast (**b**) and lung (**c**) tissue in 66 primary breast and 321 lung adenocarcinoma samples. CpG methylation levels were clustered using Euclidian distances and the Complete cluster method. DNA methylation levels are color-coded from 0% (white) to 100% (dark blue) and normal (blue) and cancer (red) samples are color-coded. (**d**) Repression of *MIRLET7B* and *MIRLET7A3* in breast and lung cancer cell lines (indicated). Expression levels were determined by quantitative real-time PCR and are displayed relative to the respective normal controls. (**e,f**) Repression of *MIRLET7B* and *MIRLET7A3* in primary in (**e**) breast (TCGA [4]) and (**f**) lung (TCGA [9]) cancer samples. Significances of a Wilcoxon test are indicated.

**Figure S12.** Focal DNA demethylation events within colorectal super-enhancer regions. Scaled 23 hypomethylated super-enhancers and flanking regions in equally spaced windows. Differential average CpG methylation levels (primary tumor - normal sample) are displayed for the respective windows with colors indicating hypo- (green) and hypermethylation (red).

**Figure S13.** (**a-c**) Association between transcriptional activity (y-axis) of *MYC* (**a**), *RNF43* (**b**) and *GPRC5A* (**c**) and hypomethylation (x-axis, HumanMethylation450 BeadChip, 450K) of their related super-enhancer in normal (blue, n=12) and colorectal cancer (red, n=258) samples (TCGA [10]). Significance was assessed using a linear regression model applied solely to the cancer samples. (**d**) DNA methylation profiles of the super-enhancer region associated with *GPRC5A* in normal mucosa (red) and the colorectal cancer sample (blue). Smoothed (colored line), raw (grey bars) CpG

methylation levels, hypomethylated regions (colored bars) and the super-enhancer (black bars) are indicated. The enhancer-related histone marks H3K27ac (orange) and H3K4me1 (blue) and the promoter-related mark H3K4me3 (pink) are displayed as ChIP-seq signal intensities (bottom panels) [8]. The transcription start site is indicated (broken line).

**Figure S14.** *FOXQ1* is overexpressed in primary colorectal tumor samples and correlates with the loss of DNA methylation in super-enhancers. **(a)** Gene expression levels of transcription factors with binding motifs significantly enriched ( $p \leq 0.05$ ) at hypomethylated super-enhancers in the primary colorectal cancer sample (Table S6). Displayed are log fold-change (FC) expression levels comparing matched (black) unmatched (blue) primary colorectal cancer samples (COAD, TCGA). **(b)** Correlation analysis between DNA methylation levels in hypomethylated super-enhancer regions (Table S5) and gene expression of enriched transcription factors. Significant associations were assessed using a linear regression model on the cancer samples (red). Slopes and p-values are displayed below the annotation of the tested transcription factors. Matched DNA methylation was determined by averaging over the DNA methylation array probes (TCGA) falling into the hypomethylated regions of the super-enhancers.

**Figure S15.** Association of *FOXQ1* expression levels and DNA methylation levels at previously defined hypomethylated super-enhancer regions of *MYC* **(a)**, *RNF43* **(b)** and *GPRC5A* **(c)** in colorectal cancer in normal (blue) and colorectal cancer (red) samples (TCGA). Significance was assessed using a linear regression model applied solely to the cancer samples. Matched DNA methylation was determined by averaging over the DNA methylation array probes (TCGA) falling into the hypomethylated regions of the respective super-enhancers.

**Figure S16.** Association of *FOXQ1* expression levels and expression levels of genes associated with hypomethylated cancer-related super-enhancers in colorectal cancer, specifically, *MYC* **(a)**, *RNF43* **(b)** and *GPRC5A* **(c)**, in colorectal cancer in normal (blue) and colorectal cancer (red) samples (TCGA). Significance was assessed using a linear regression model applied solely to the cancer samples. Matched DNA methylation was determined by averaging over the DNA methylation array probes (TCGA) falling into the hypomethylated regions of the respective super-enhancers.

**Figure S17.** Functional validation of the effect of FOXQ1 on their predicted target genes *MYC*, *RNF43* and *GPRC5A*. (a) Chromatin immunoprecipitation (IP) experiments for FOXQ1 (flag-tagged) on predicted binding site in the super-enhancer regions related to *MYC*, *RNF43* and *GPRC5A* in HCT116 colorectal cancer cells. Significant enrichments were assigned using a Student's *t*-test (\*). Enrichments were assessed comparing IP results of FOXQ1-flag expressing to untransfected cells or to unspecific antibody binding (IgG). (b) Small hairpin RNA (shRNA) mediated knockdown of *FOXQ1* led to a reduced expression of the predicted target genes *MYC*, *RNF43* and *GPRC5A* in SW1116 colorectal cancer cells. Significant differences in expression levels were assigned using a Student's *t*-test (\*). (c) Small hairpin RNA (shRNA) mediated knockdown of *FOXQ1* in SW1116 resulted in a reduced viability of the colorectal cancer cells assessed using an MTT viability assays and analyzed over six consecutive days. Significant differences were assigned using a Student's *t*-test (\*).

**Figure S18.** Validation of the effect of *HNF4A* and *PPARG* on their predicted target genes *RNF43* and *GPRC5A*. Association of TF expression levels and expression levels of genes associated with hypomethylated cancer-related super-enhancers in colorectal cancer, specifically, *RNF43* (a) and *GPRC5A* (b), in colorectal cancer in normal (blue) and colorectal cancer (red) samples (TCGA). Significance was assessed using a linear regression model applied solely to the cancer samples. Matched DNA methylation was determined by averaging over the DNA methylation array probes (TCGA) falling into the hypomethylated regions of the respective super-enhancers. (c) Small hairpin RNA (shRNA) mediated knockdown of *HNF4A* and *PPARG* led to a reduced expression of the predicted target genes *RNF43* and *GPRC5A* in SW1116 colorectal cancer cells. Significant differences were assigned using a Student's *t*-test (\*). (d) Small hairpin RNA (shRNA) mediated knockdown of *HNF4A* and *PPARG* resulted in a reduced viability of SW1116 colorectal cancer cells assessed using an MTT viability assays and analyzed over six consecutive days. Significant differences were assigned using a Student's *t*-test (\*).

**Figure S19.** Super-enhancer disruption with the BRD4 inhibitor JQ1 does not affect DNA methylation profiles. (a) Phenotypic alterations of colorectal cancer cells after JQ1 treatment. HCT116 and SW1116 cells after 48h of treatment with DMSO (vehicle control) or 10 $\mu$ M, 50 $\mu$ M and 100 $\mu$ M of JQ1. Cell viability decreased at 10 $\mu$ M and showed high toxicity at concentration  $\geq$ 50 $\mu$ M. (b) Cell viability assay after treatment with crescent concentrations of JQ1 for 48h to determine drug EC50 values (indicated). Each data point corresponds to the mean of four replicates and represents the

percentage of JQ1-treated cells in respect to vehicle treated cells. Error bars  $\pm$ SD are displayed. Viability curves were generated using a sigmoidal dose-response model with a variable slope. **(c)** DNA methylation levels of CpG sites within normal colon (up) or colorectal (down) super-enhancers comparing JQ1 (y-axis) and vehicle (x-axis) treated cells. Experiments were performed in HCT116 (left) and SW1116 (right) cancer cell lines and DNA methylation was determined using the Infinium HumanMethylation450 BeadChip. Similarity was assessed using a Spearman's correlation test (indicated). **(d)** Expression levels of *MYC*, *RNF43* and *GPRC5A* in HCT116 and SW1116 cells determined by qRT-PCR following 48h treatment with JQ1 or vehicle control (DMSO).

Figure S1

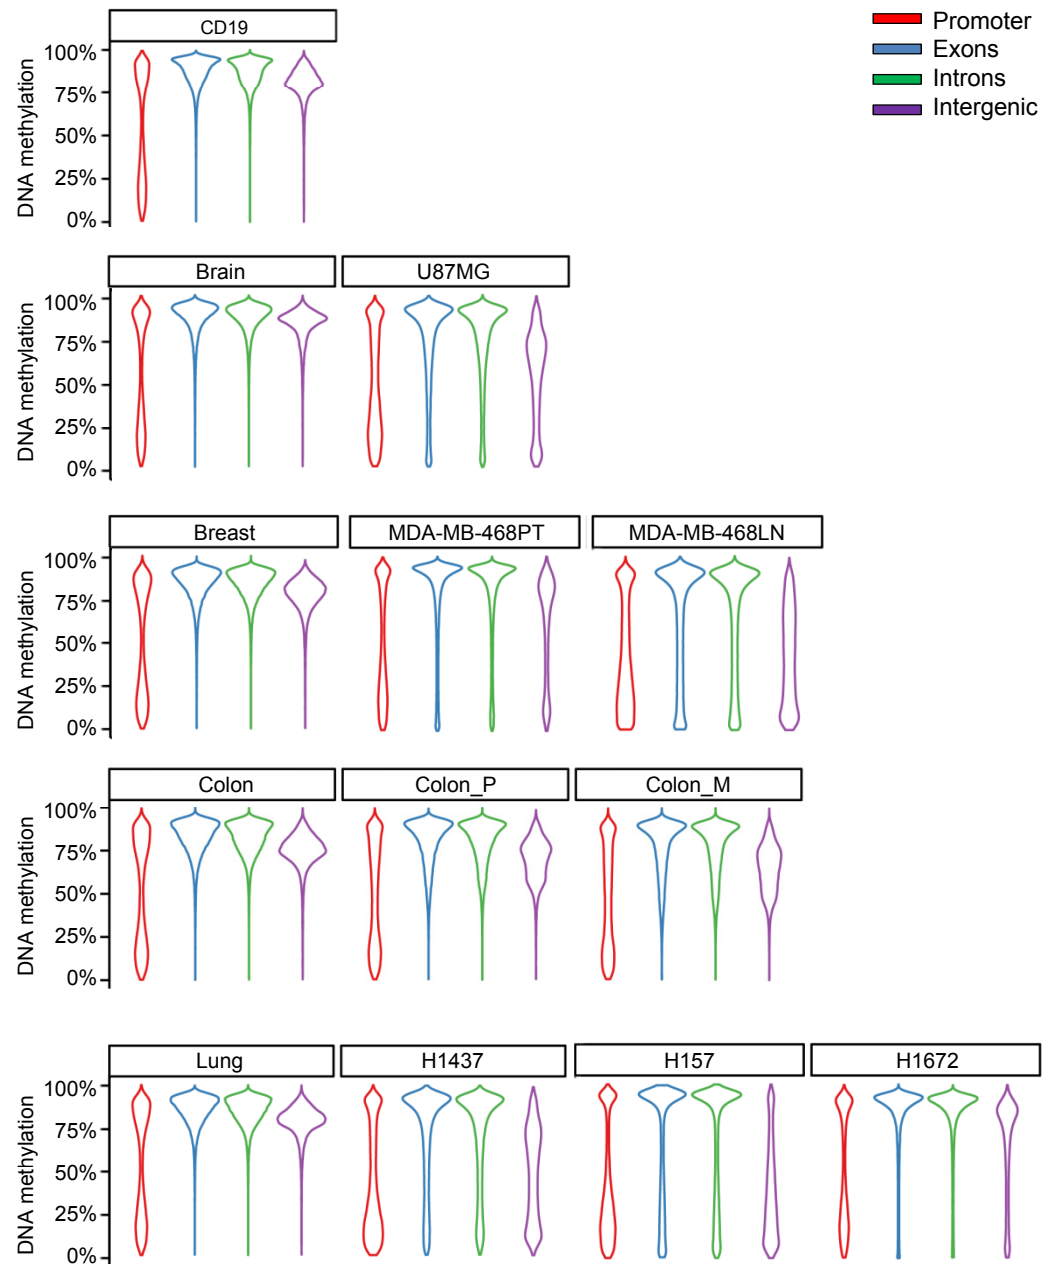

Figure S2

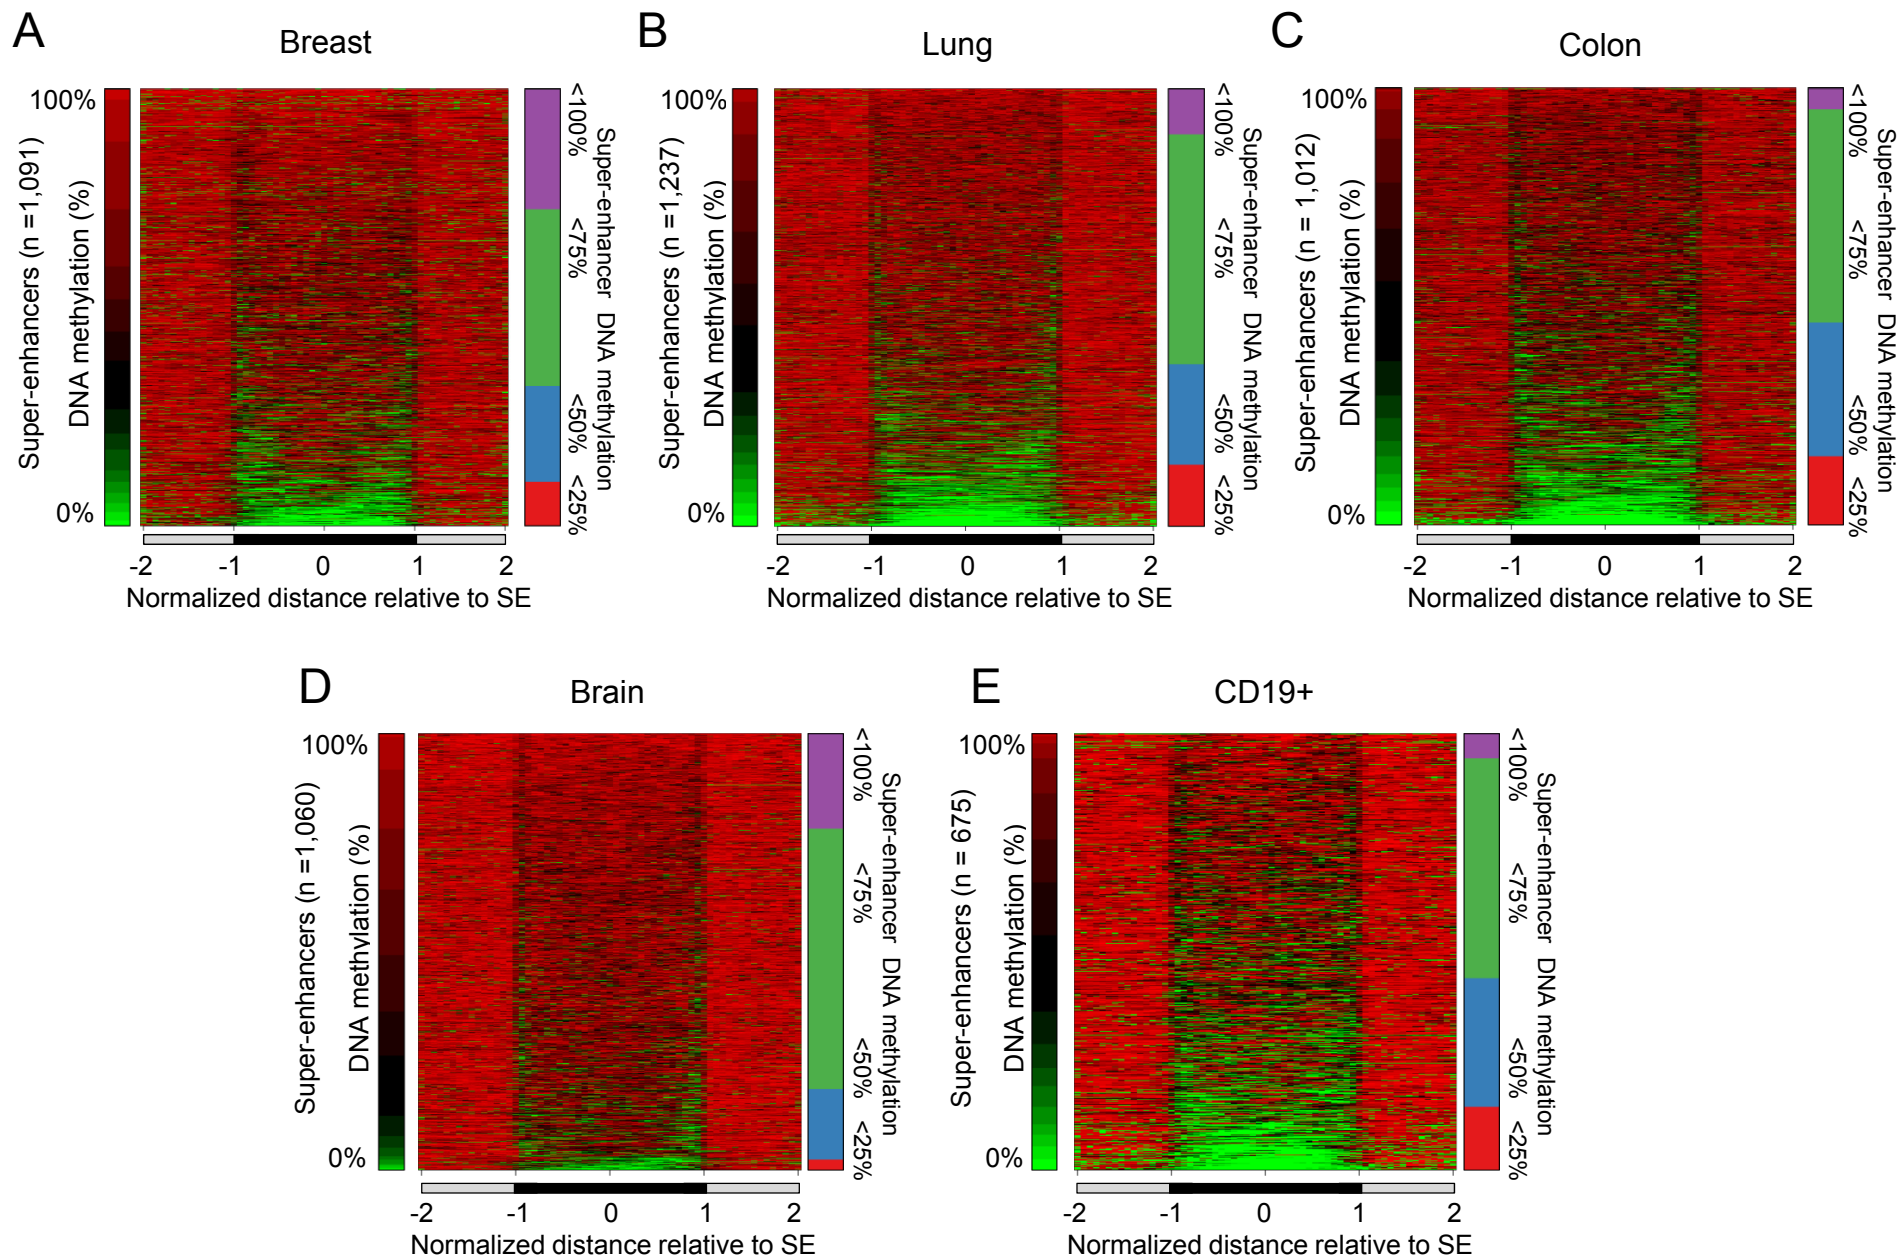



Figure S3

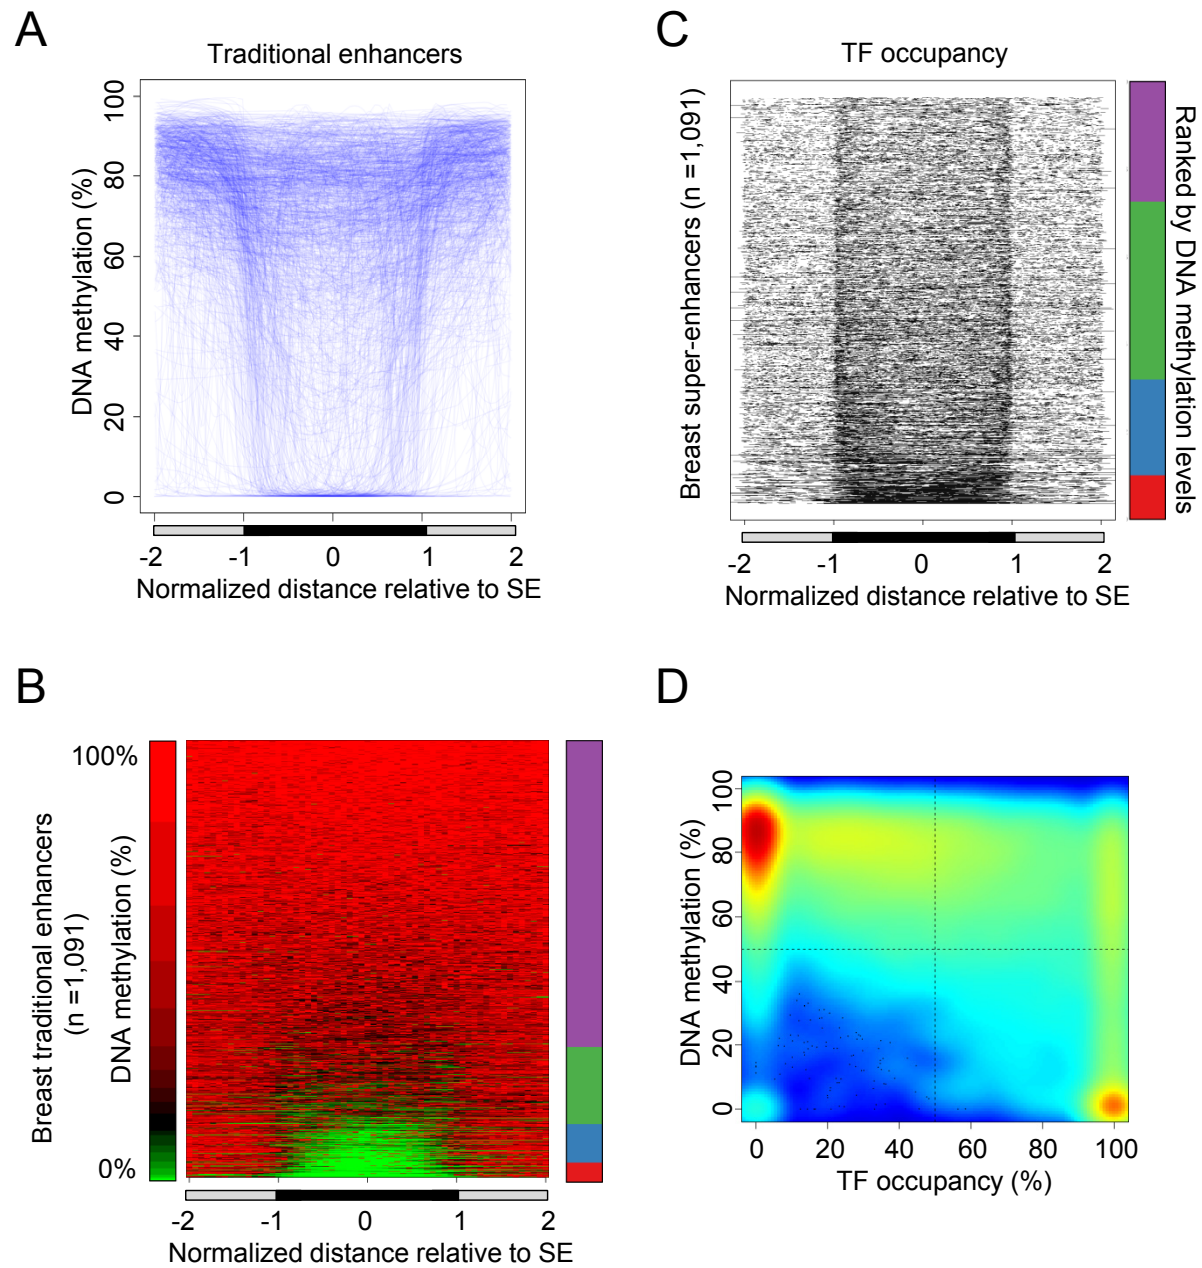

Figure S4

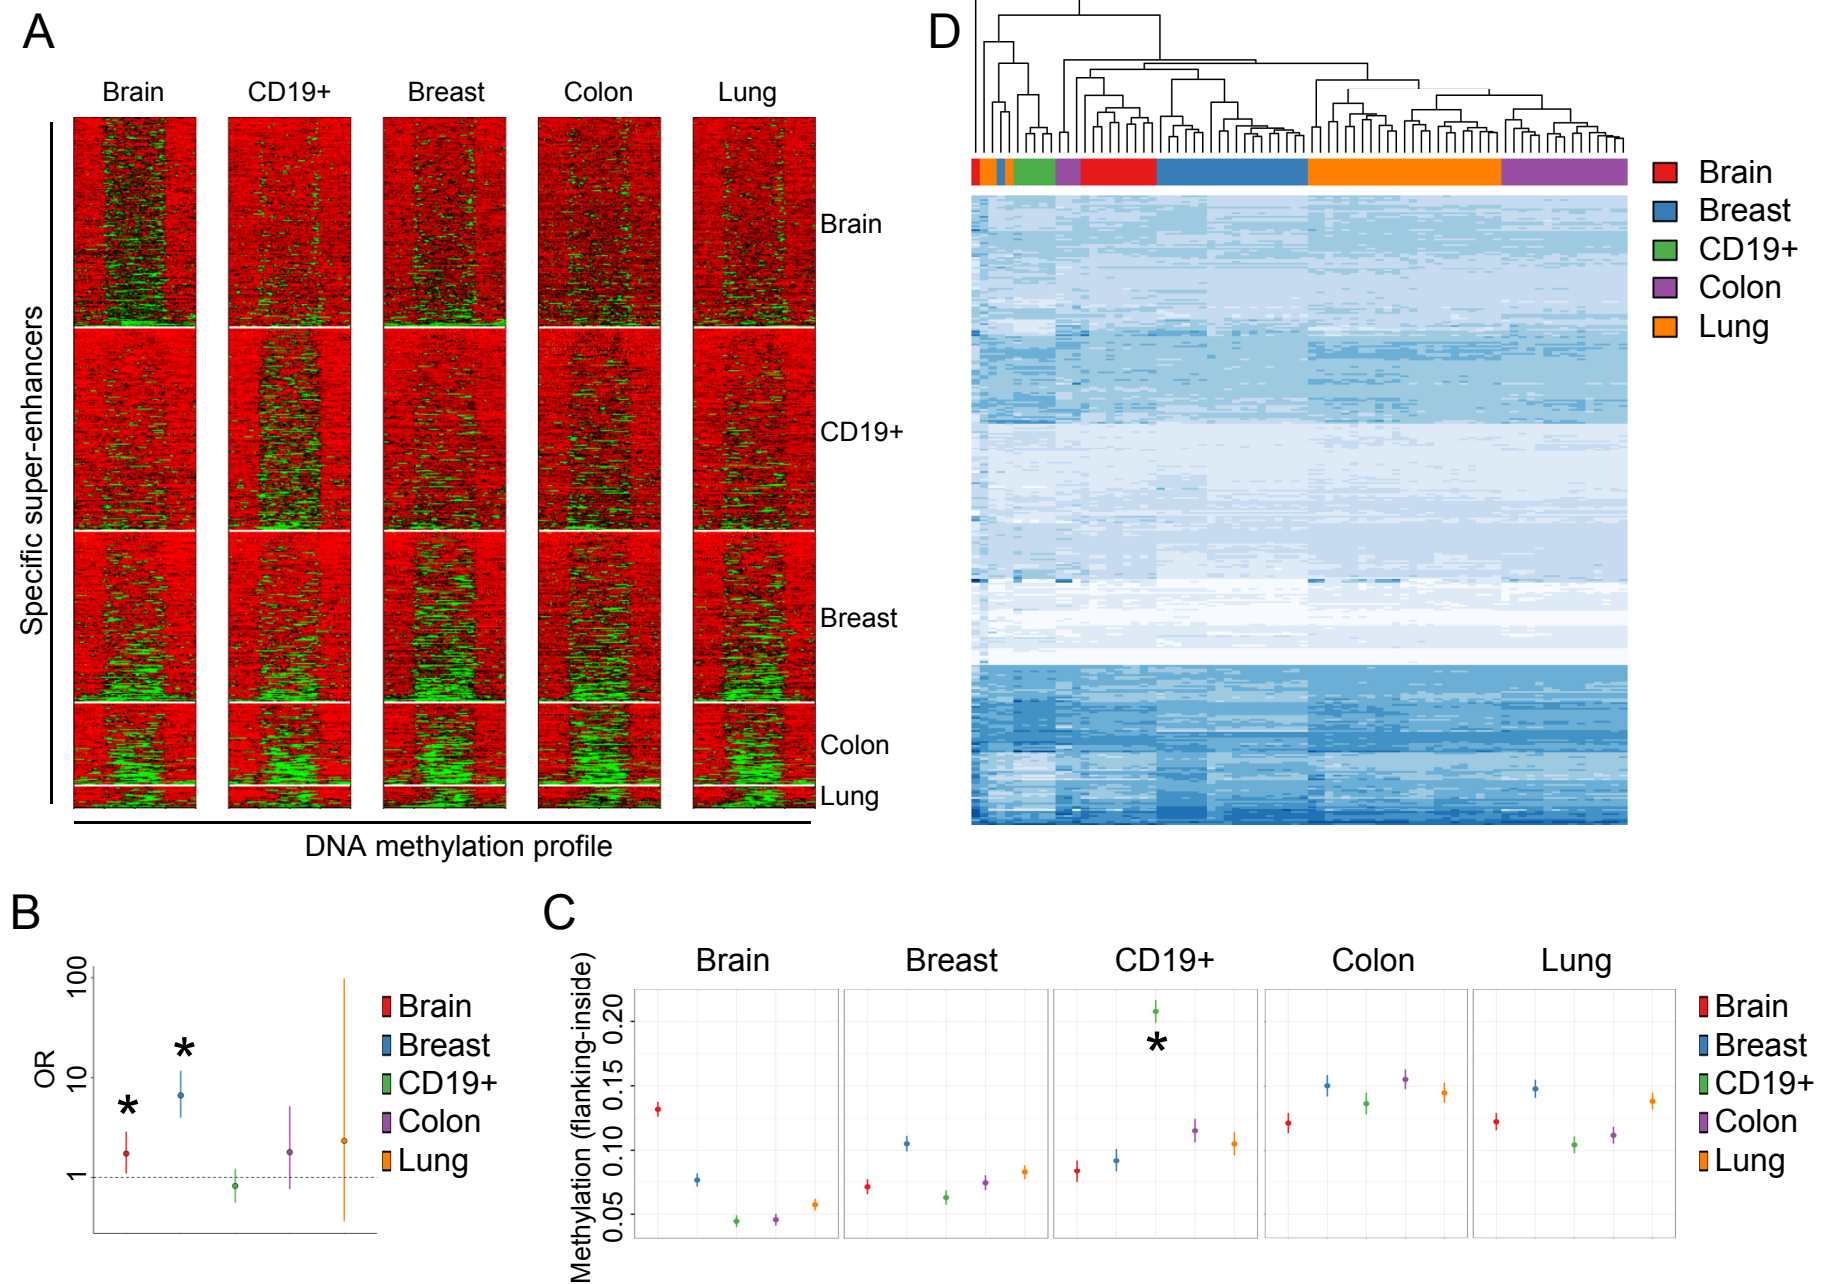

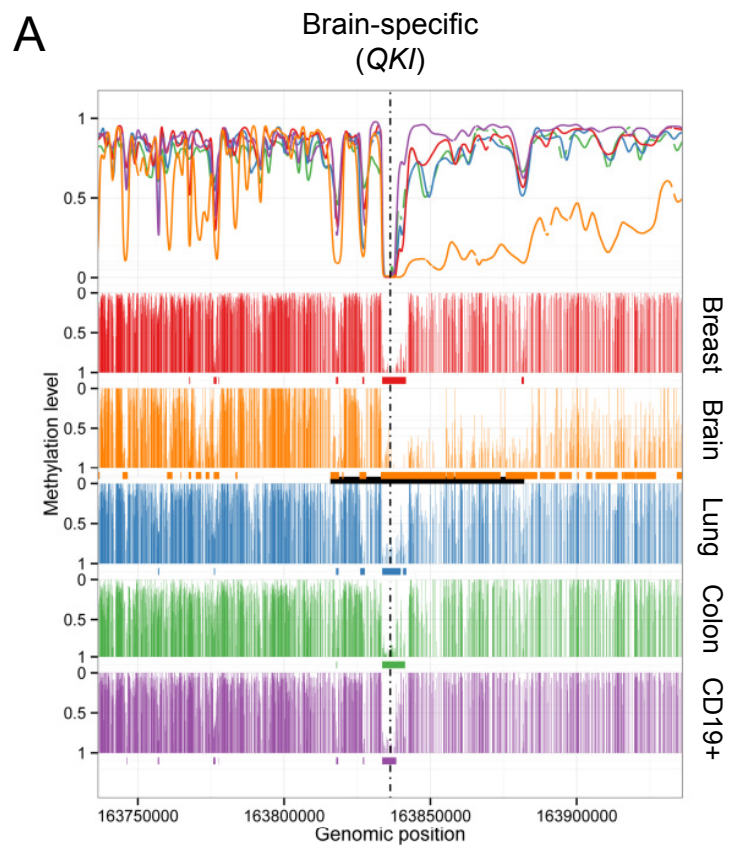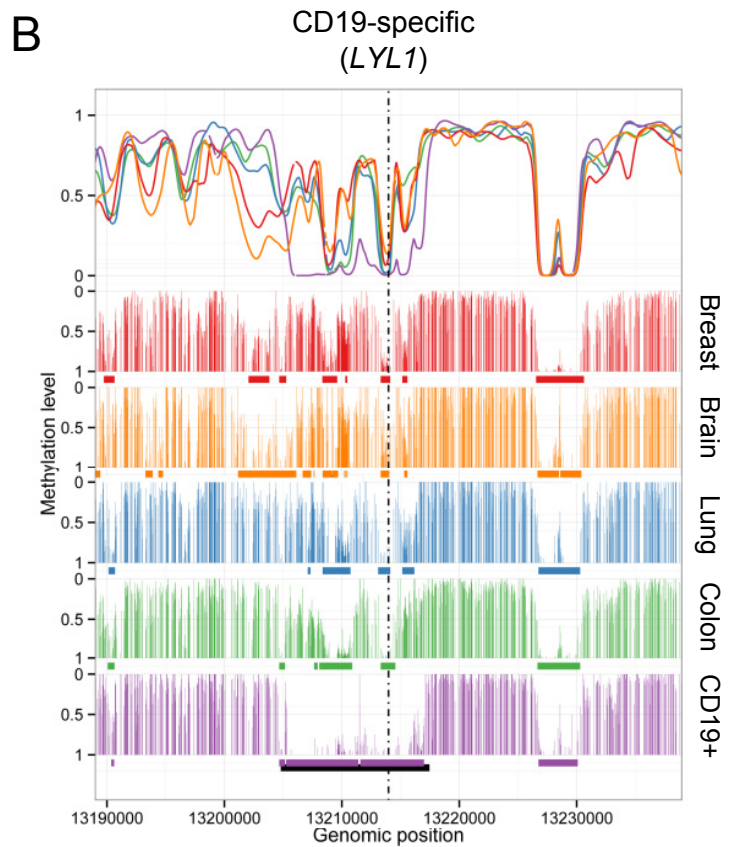

Figure S6

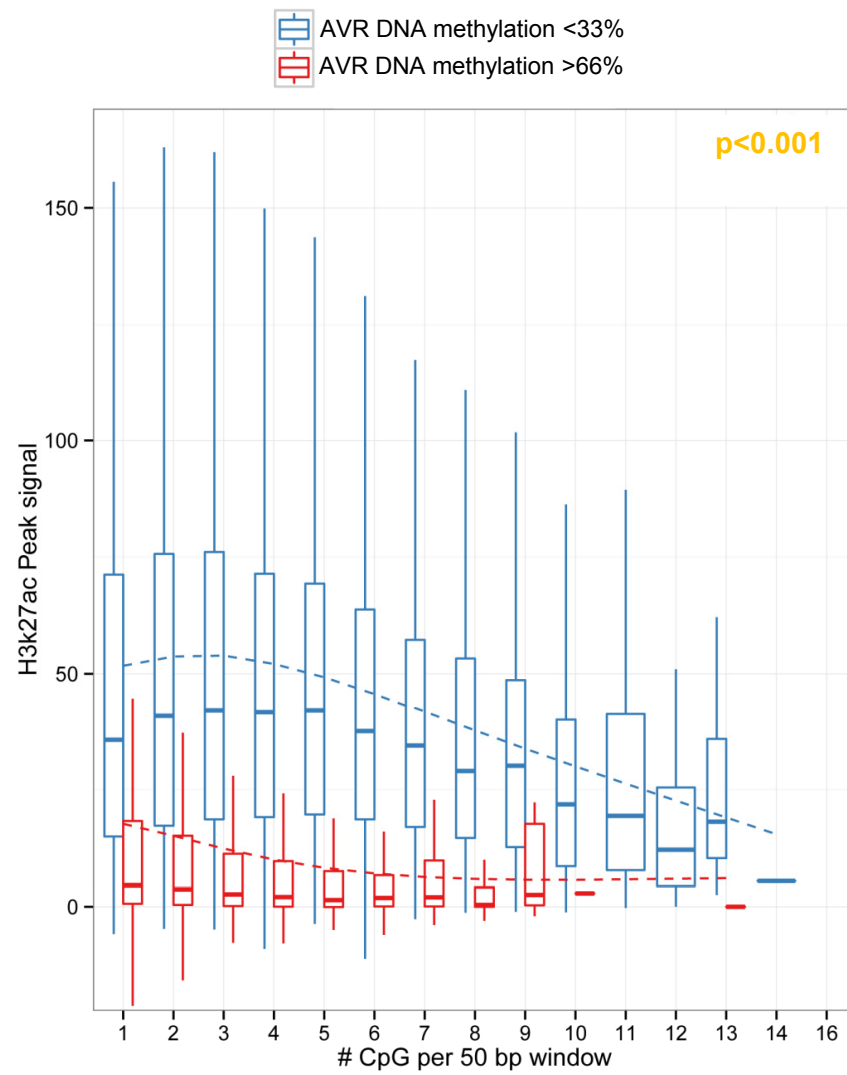

Figure S7

A

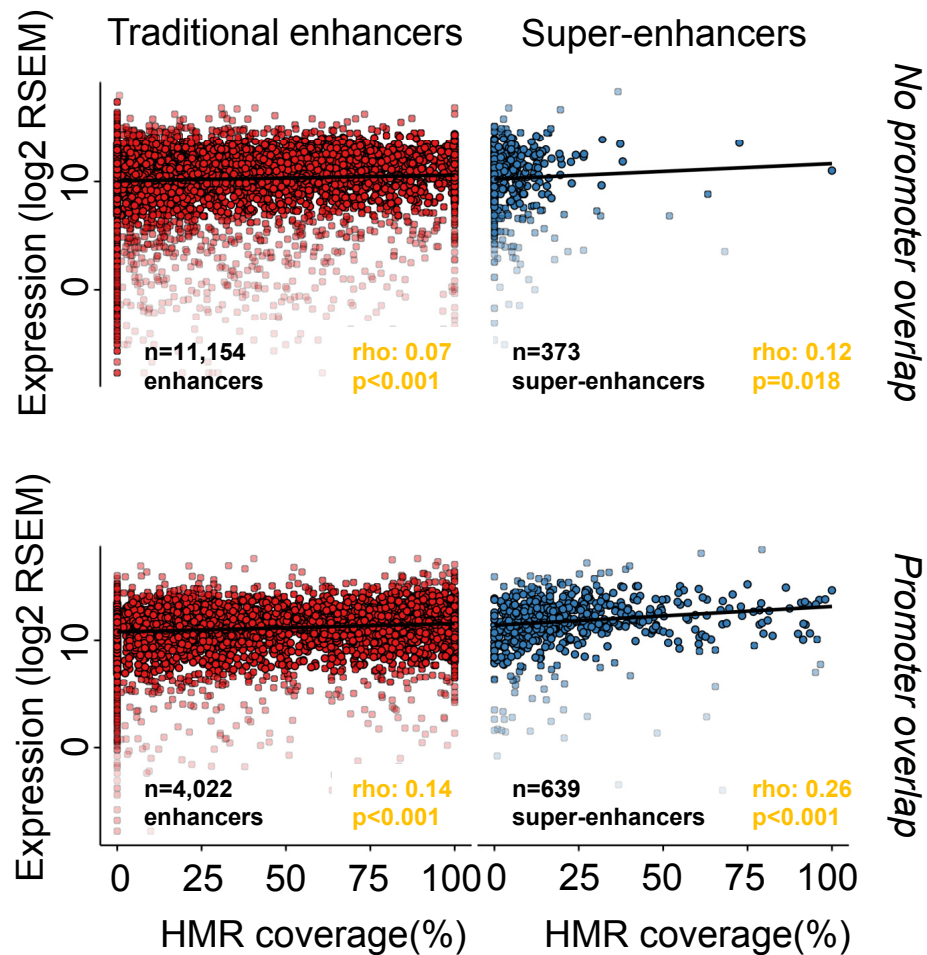

B

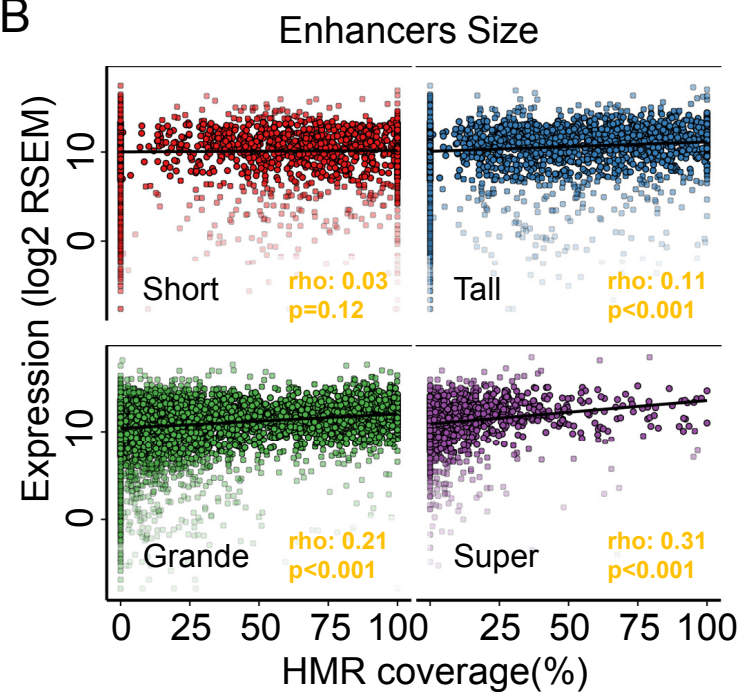

C

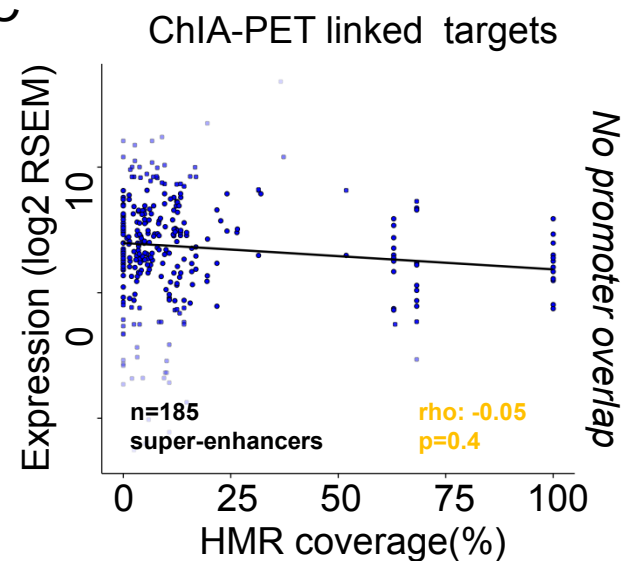

Figure S8

A

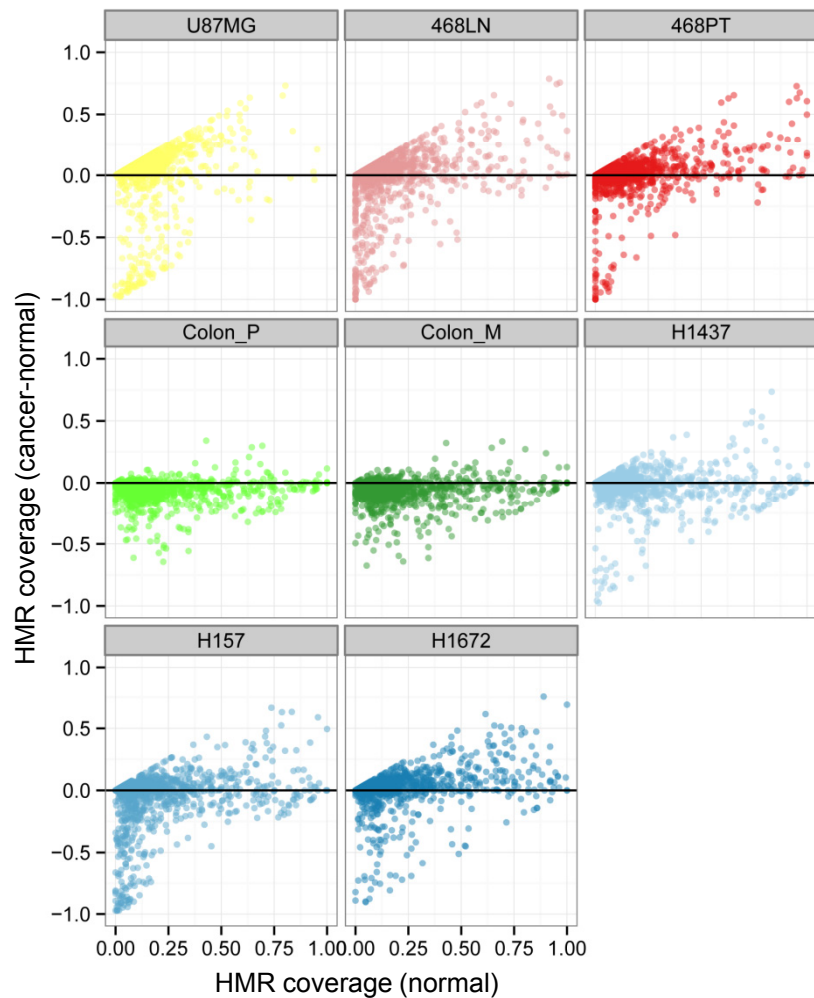

B

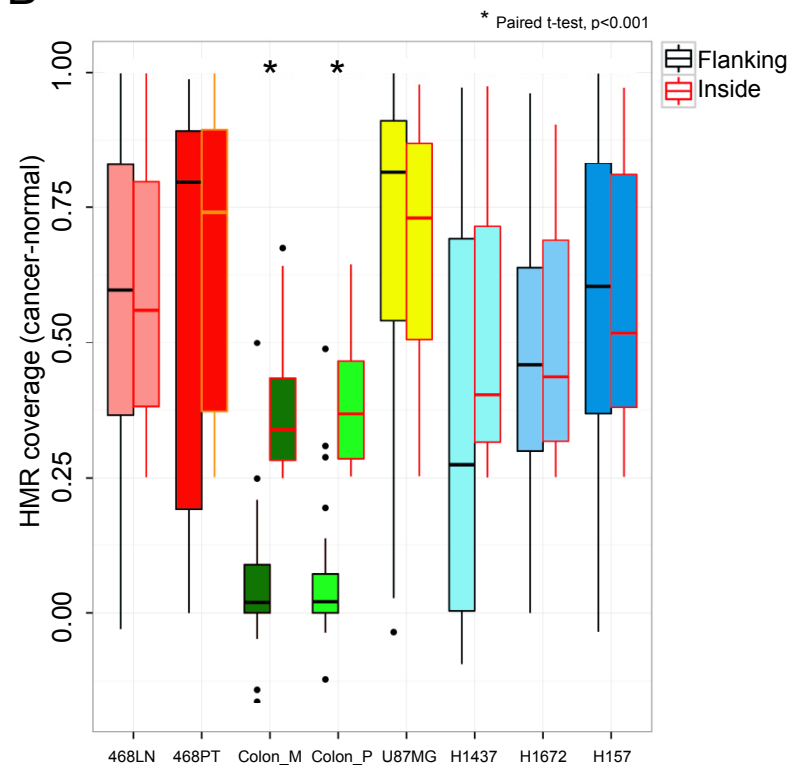

Figure S9

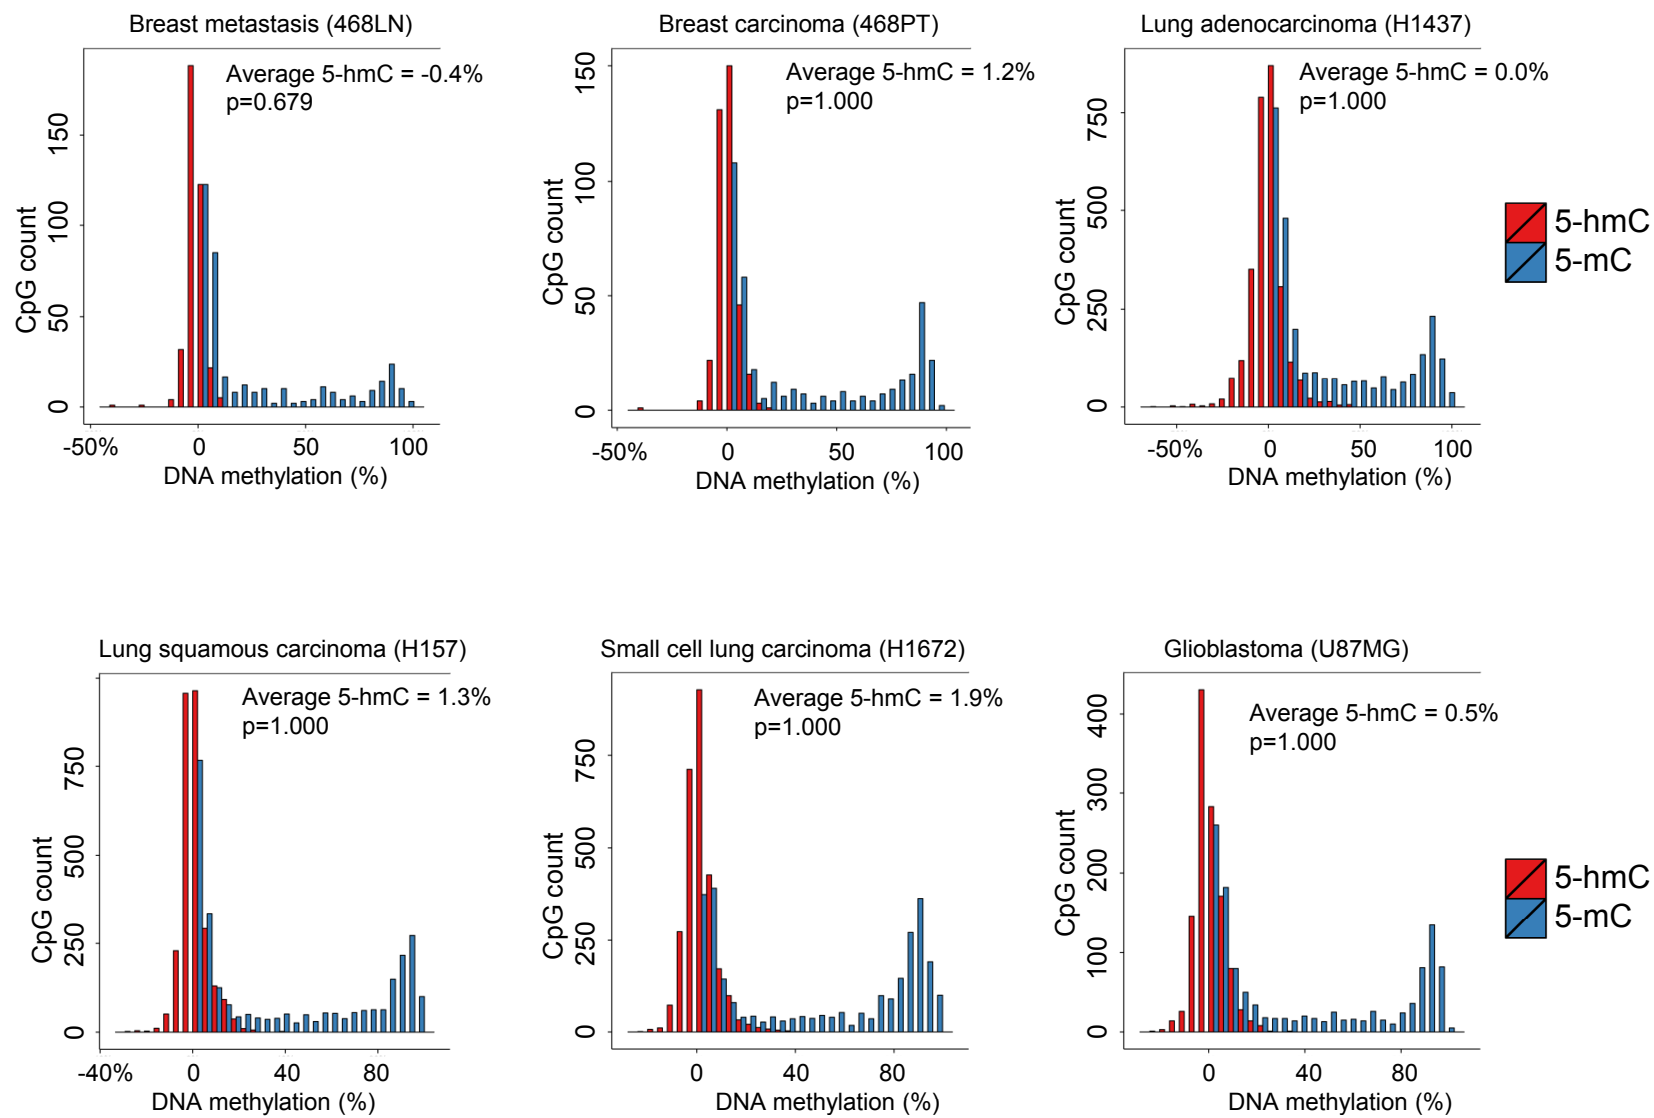

Figure S10

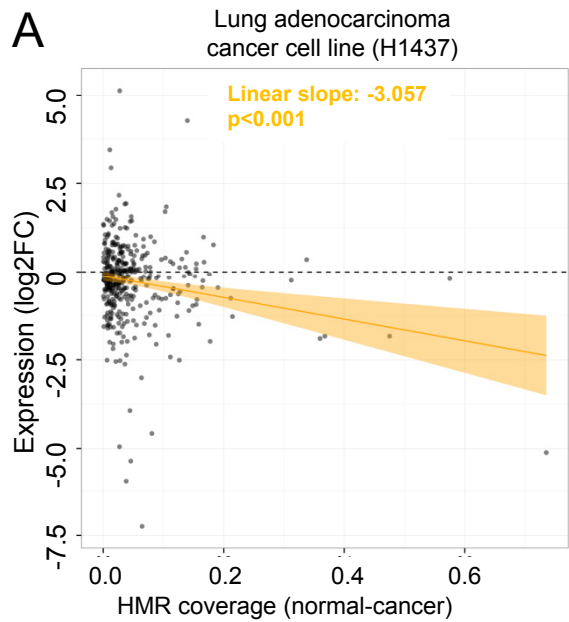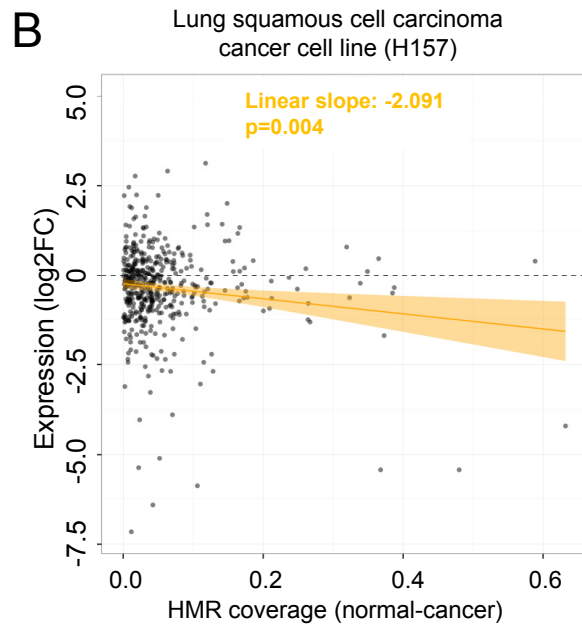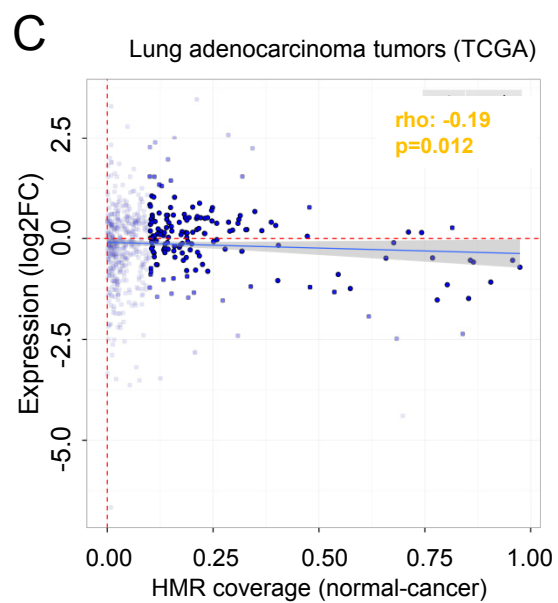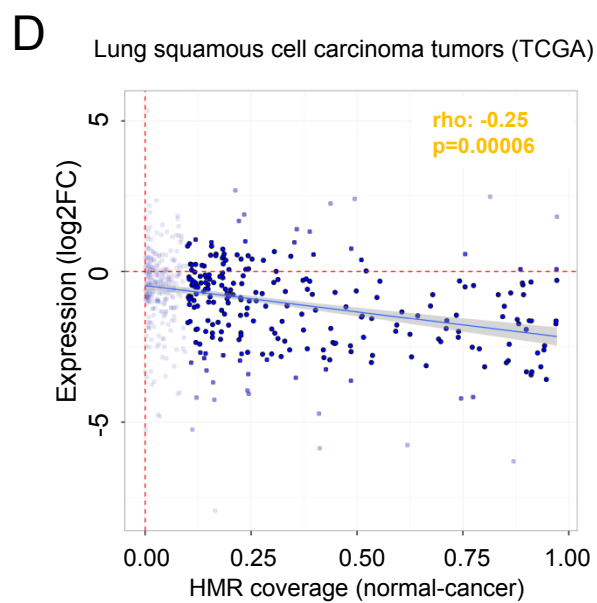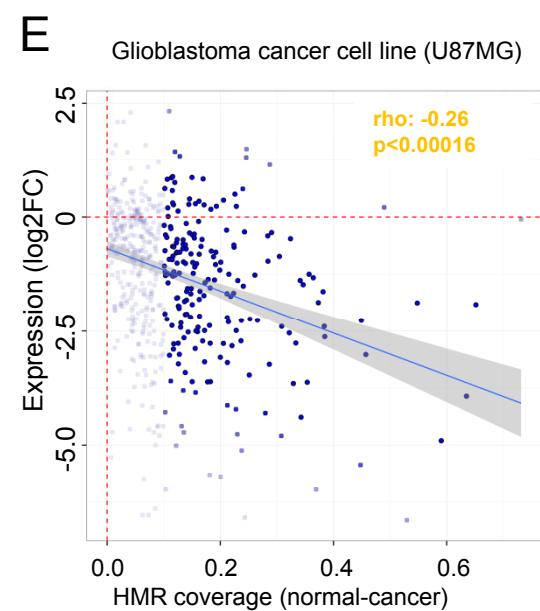



Figure S11

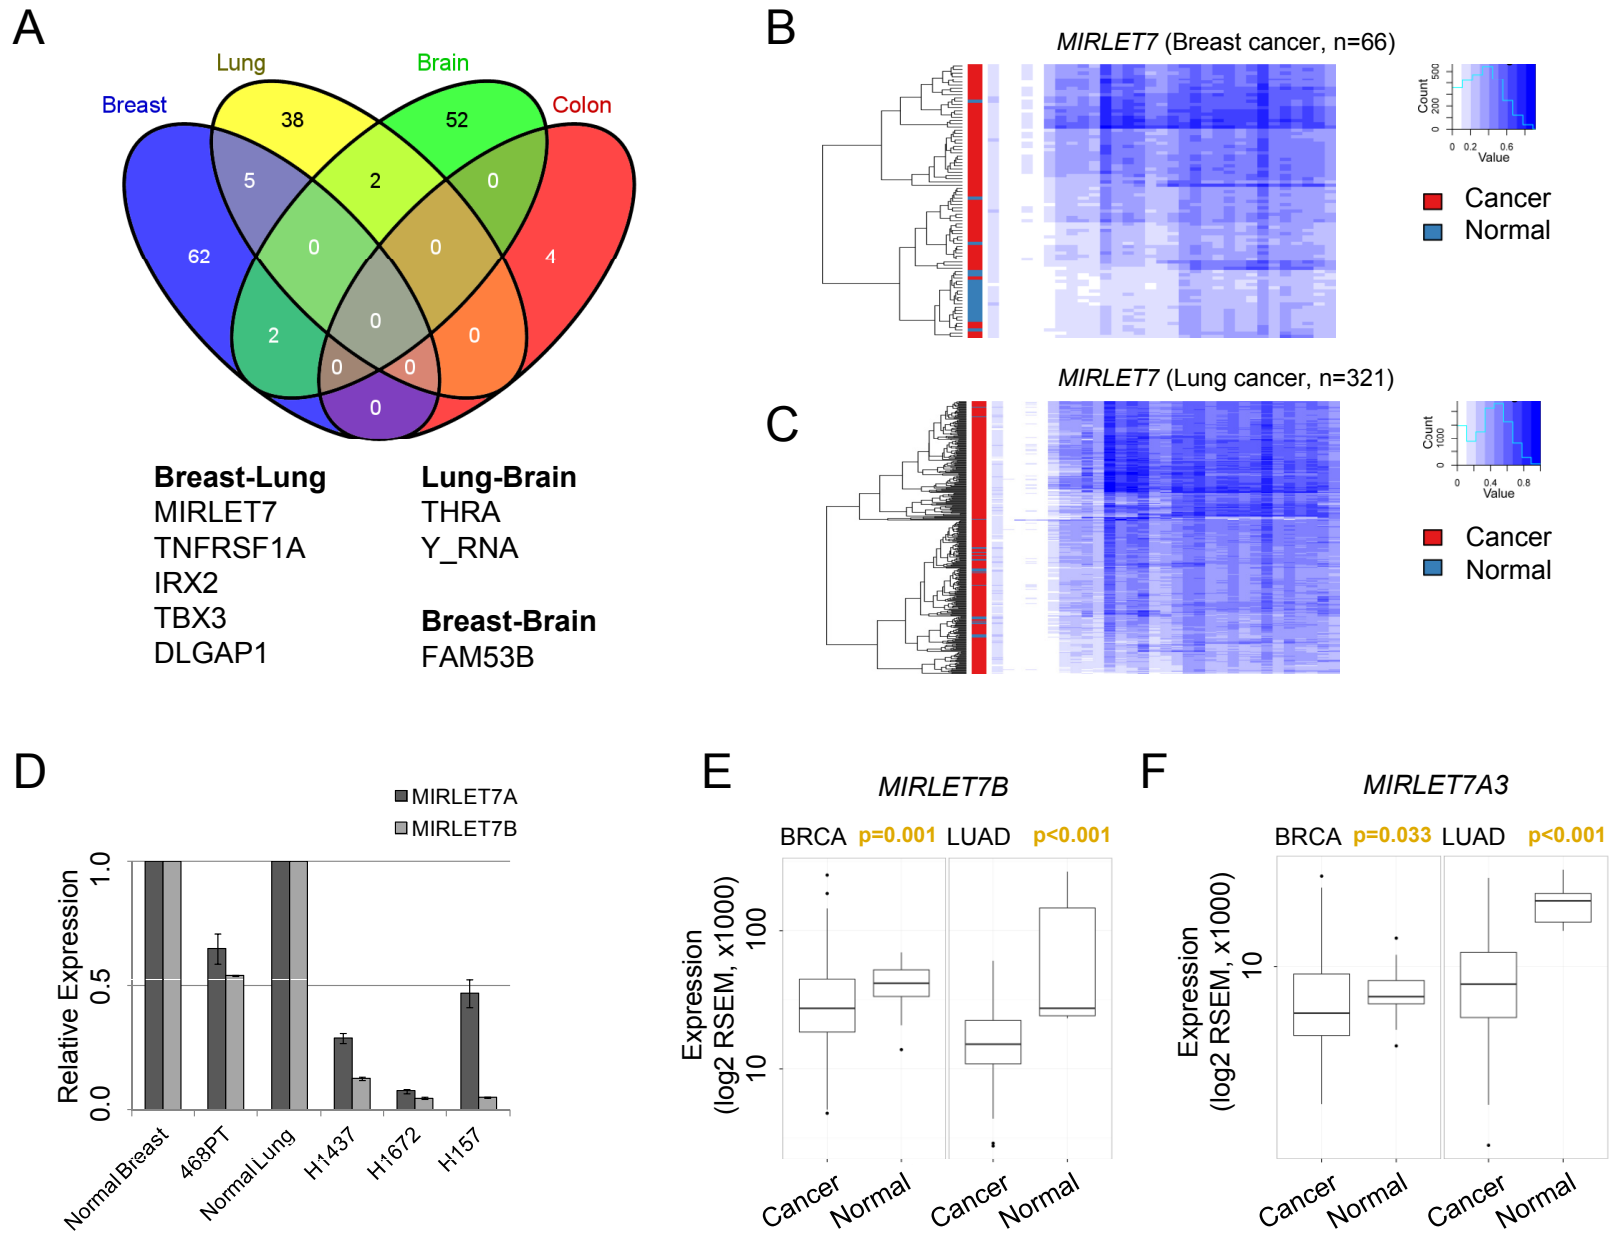

Figure S12

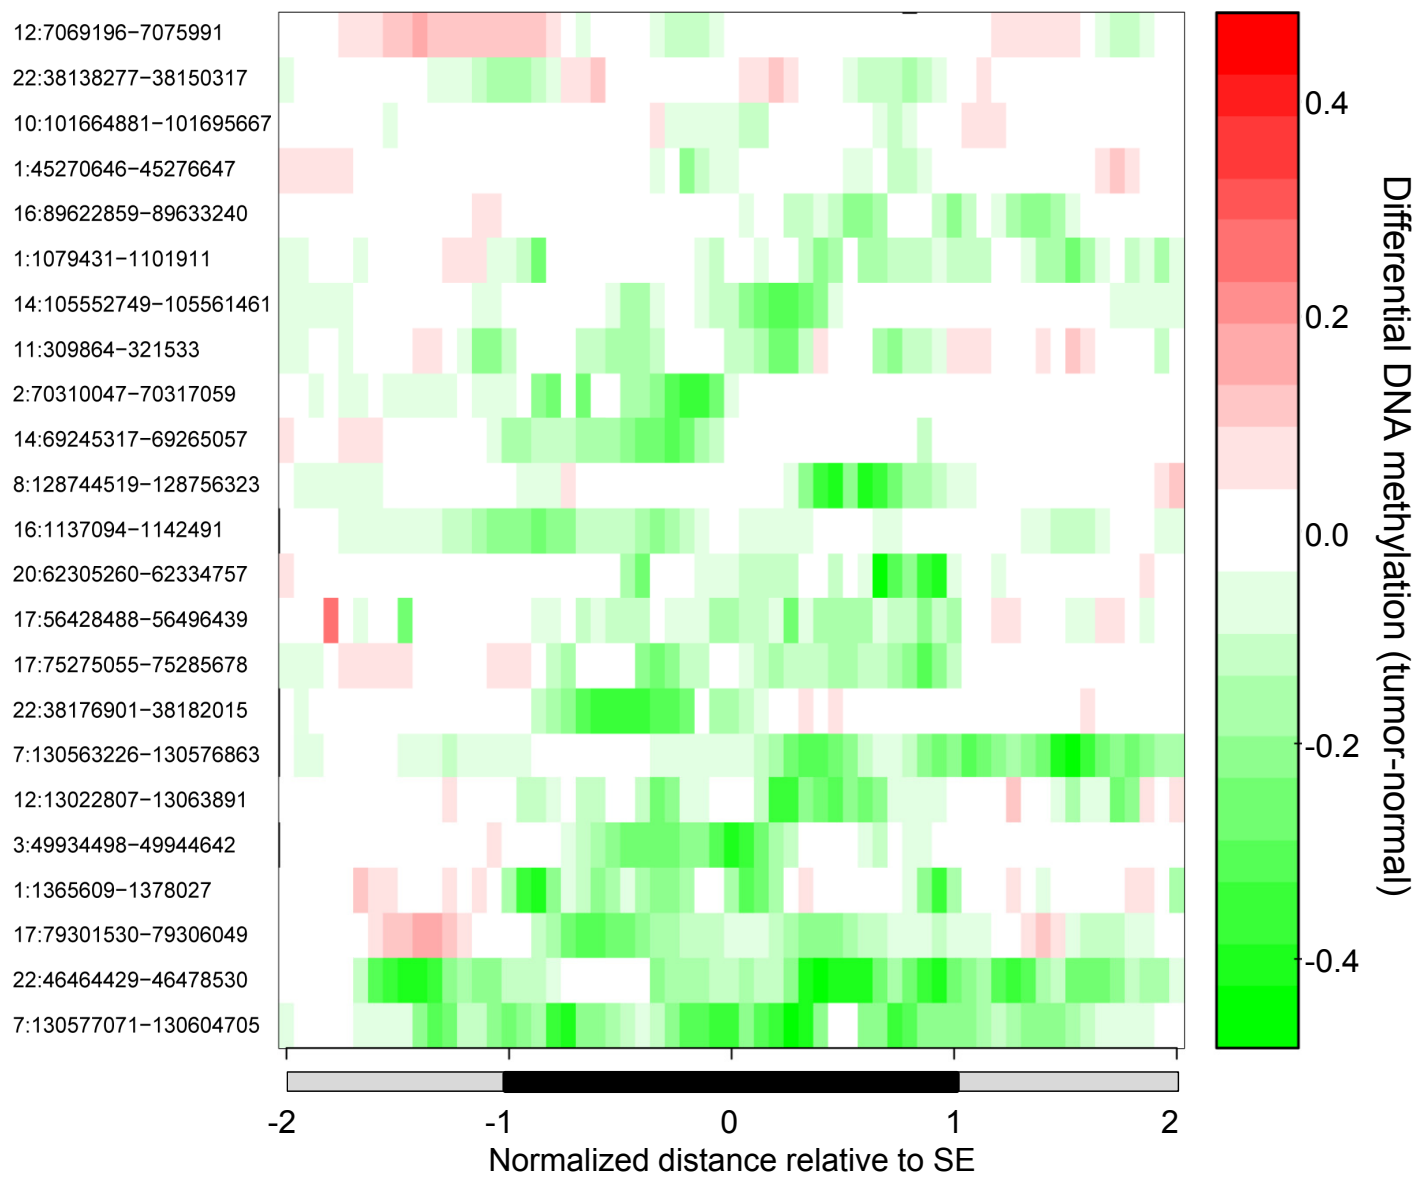

Figure S13

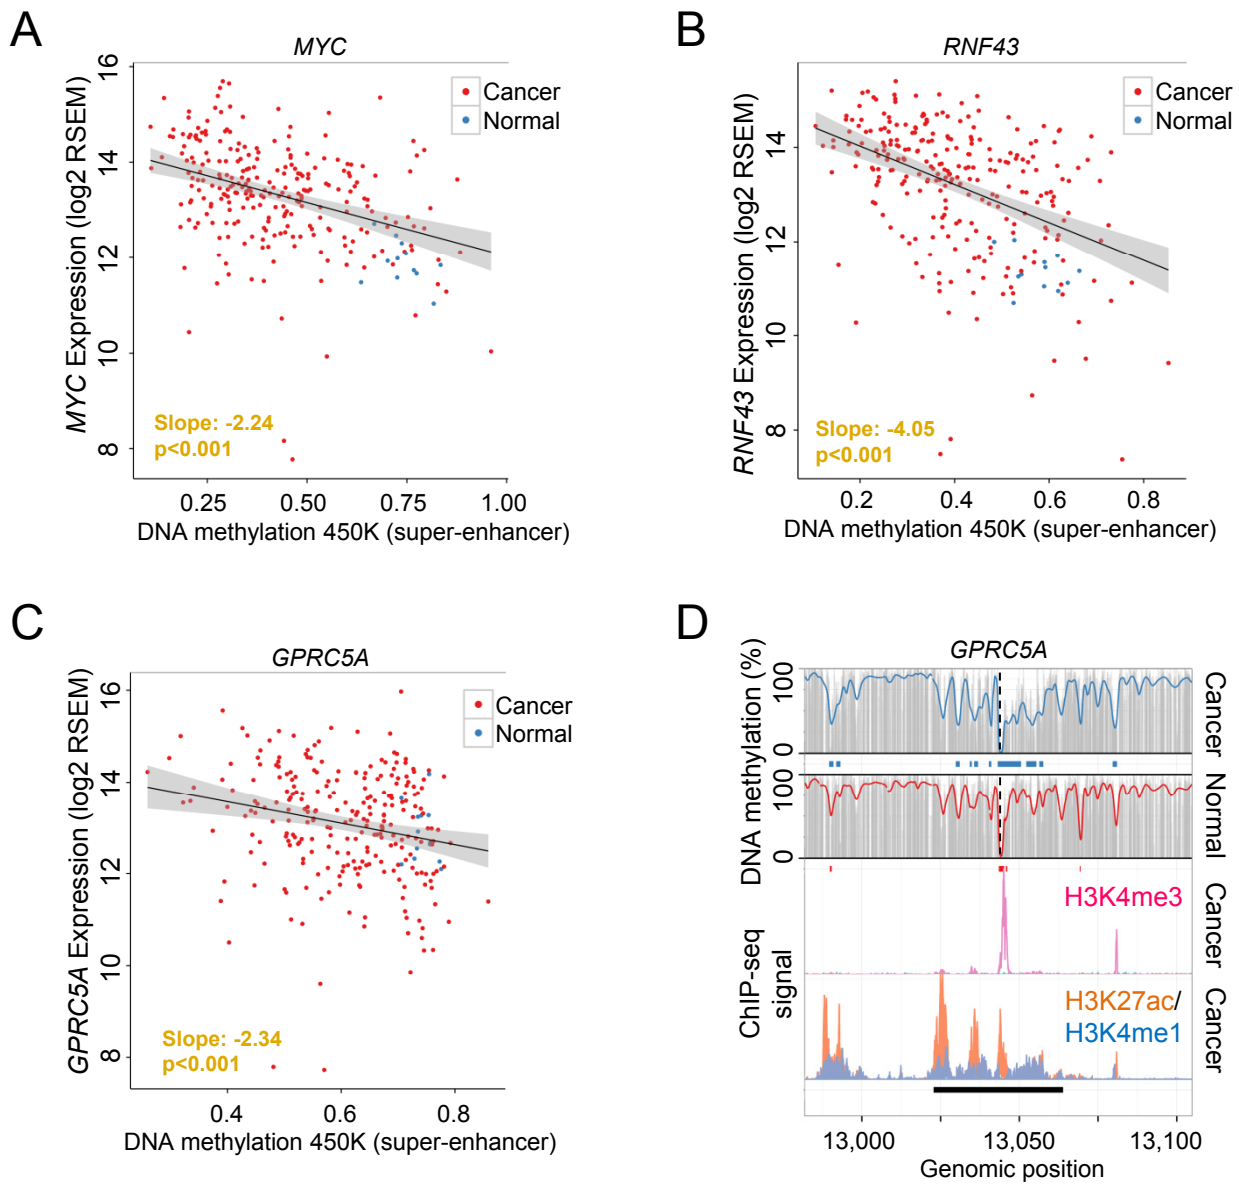

Figure S14

A

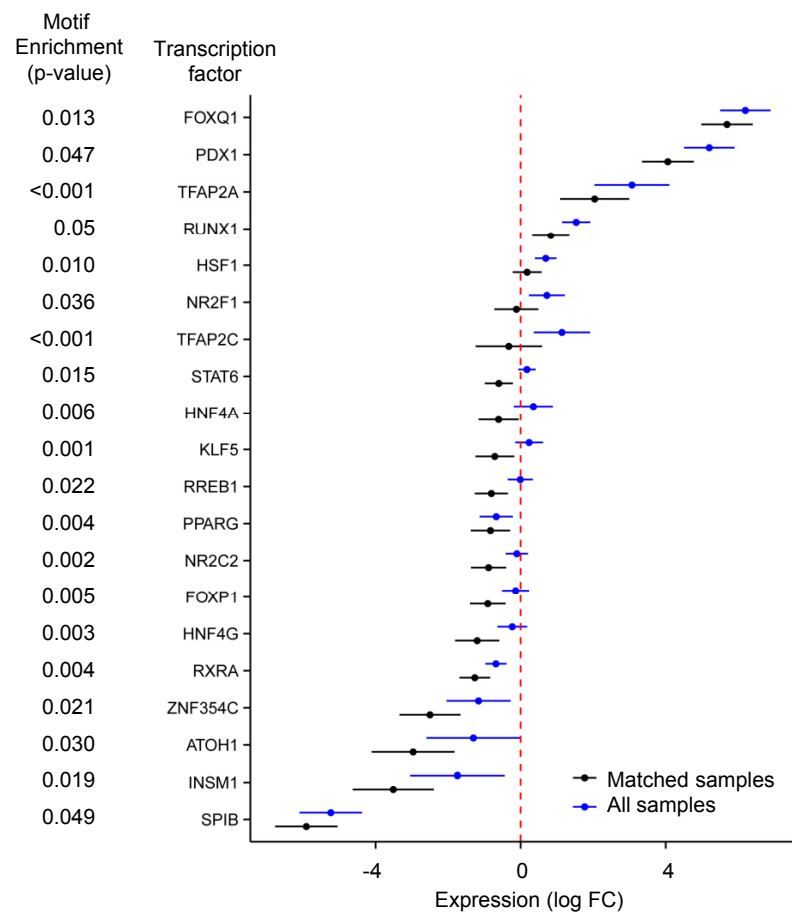

B

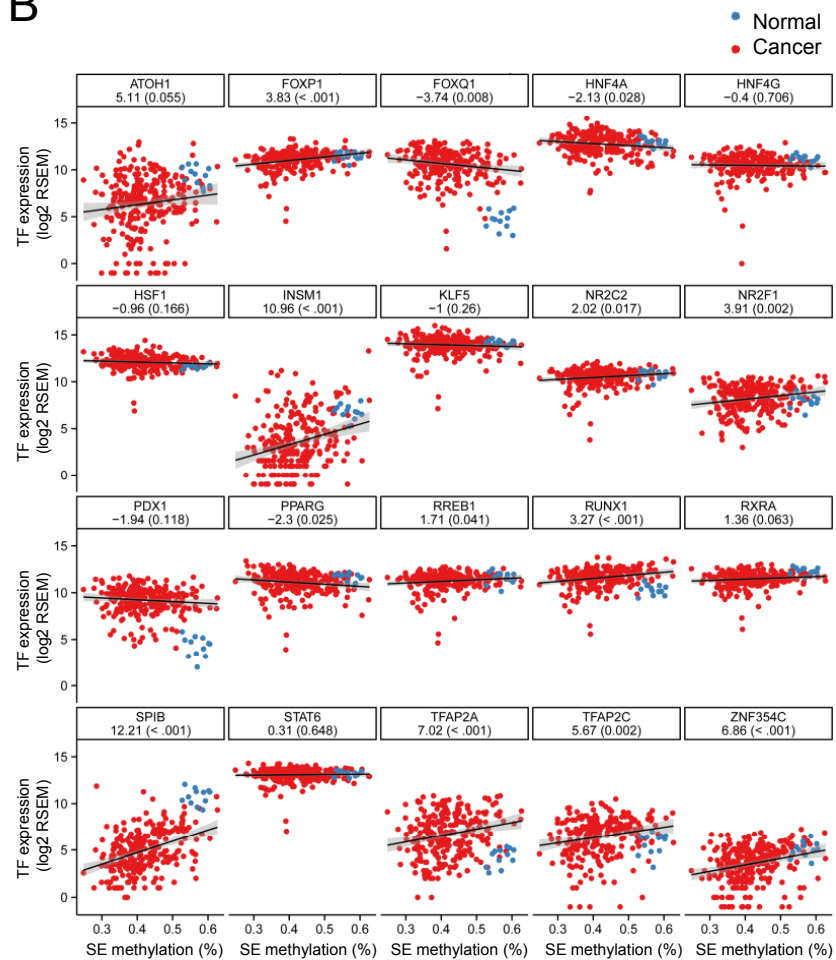

Figure S15

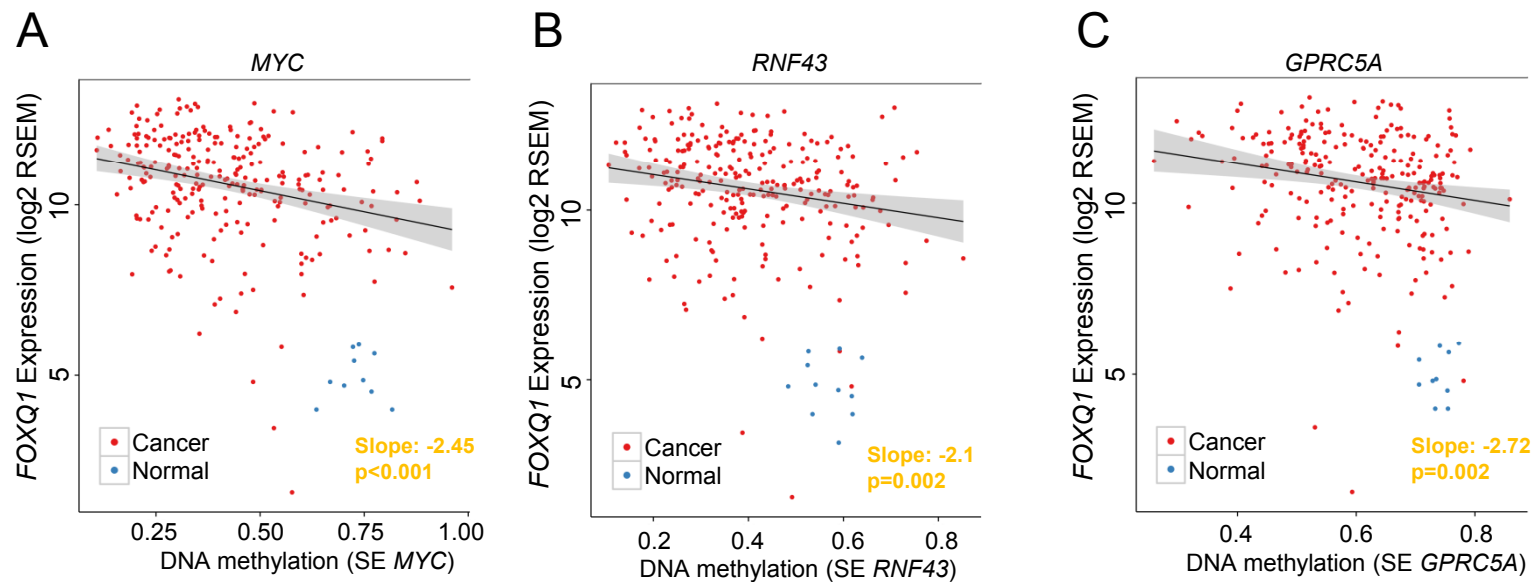

Figure S16

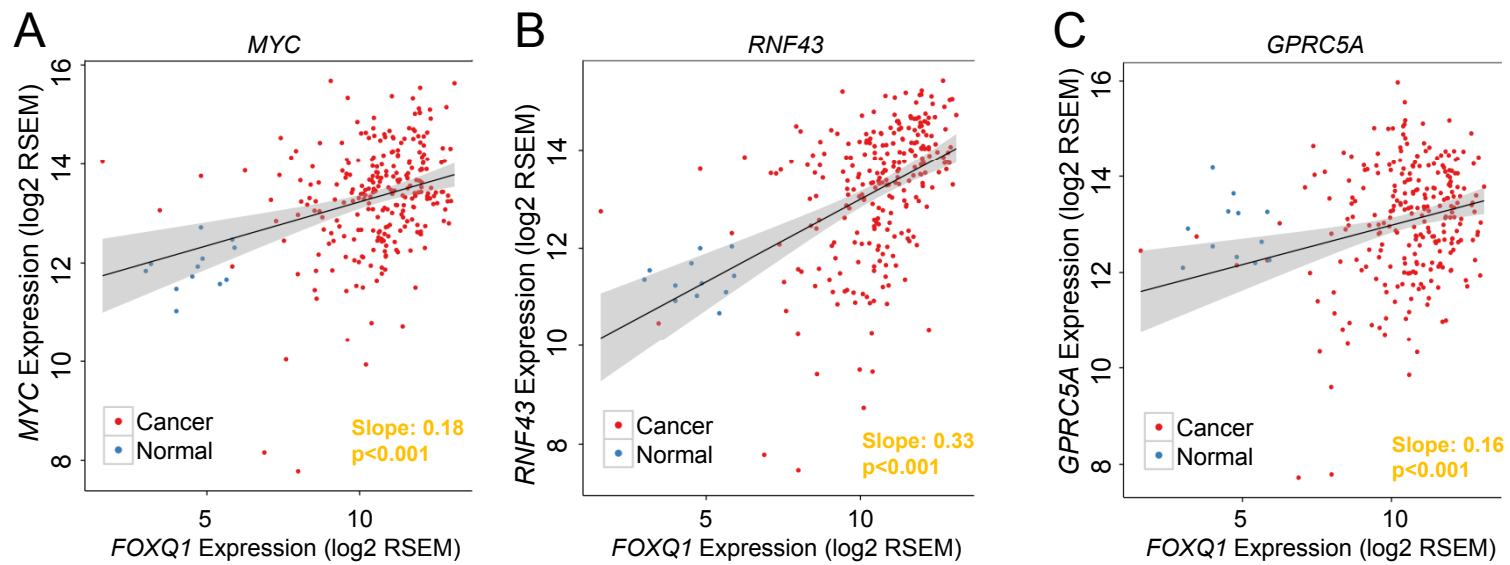

Figure S17

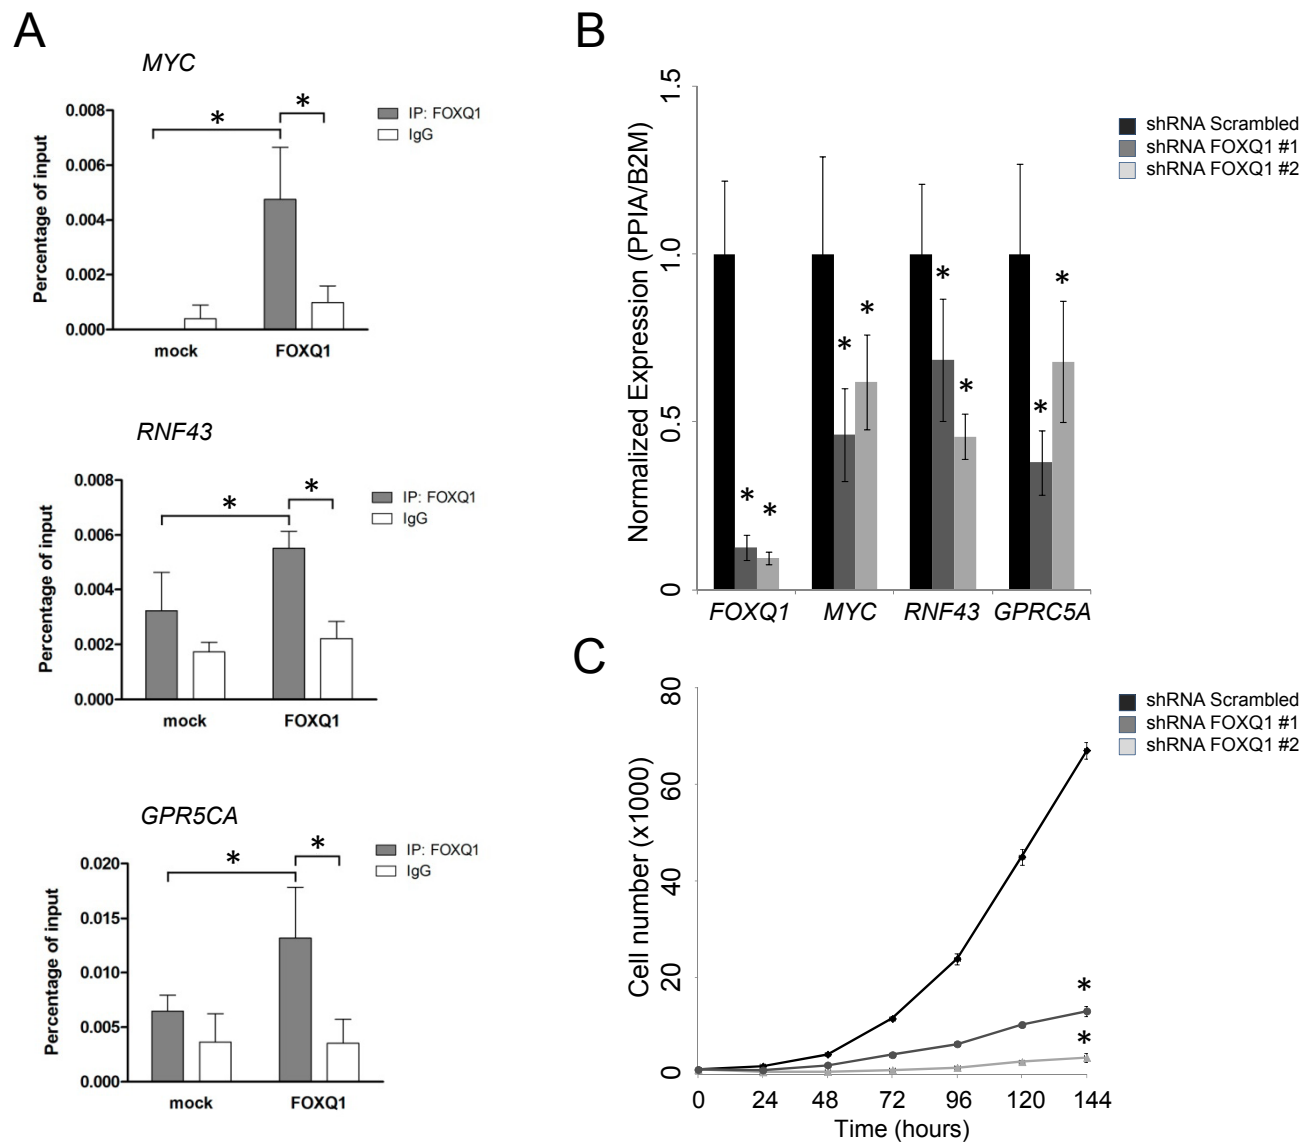

Figure S18

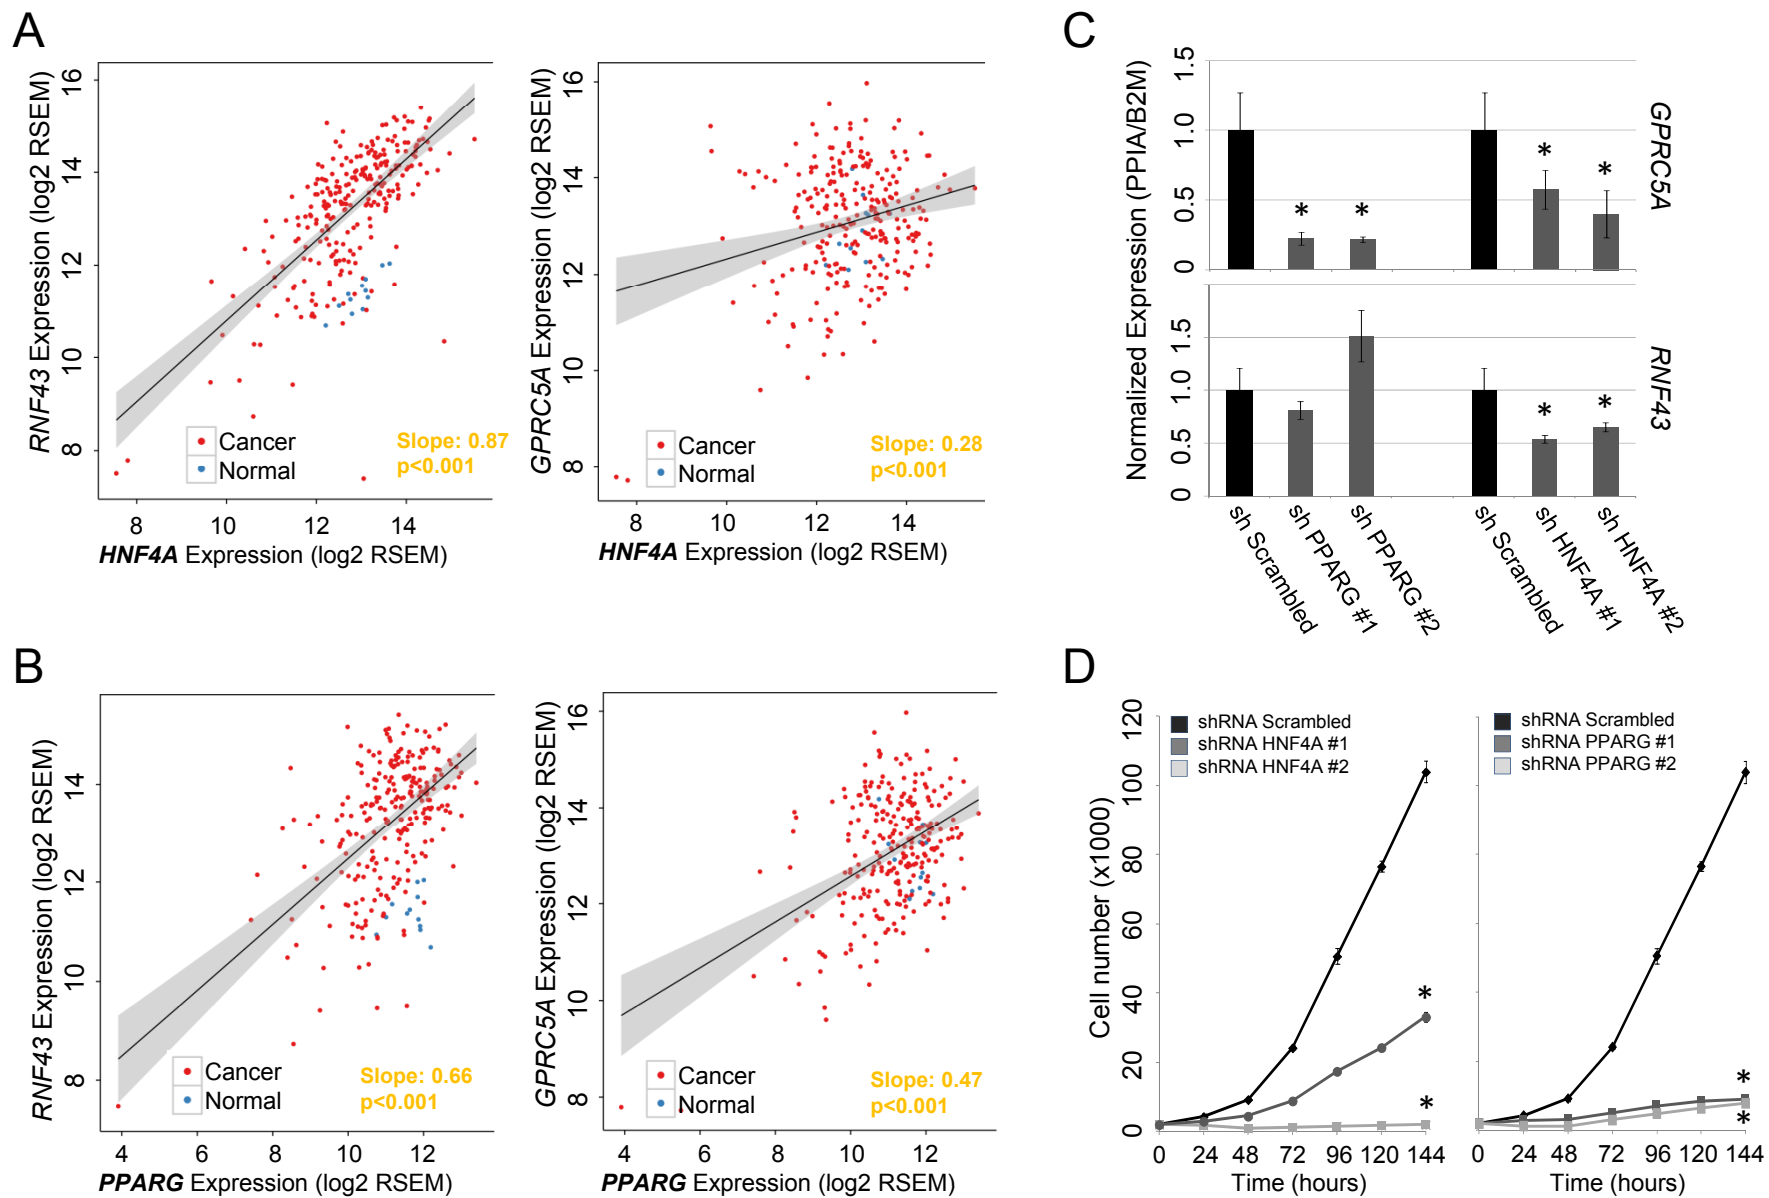



Figure S19

A

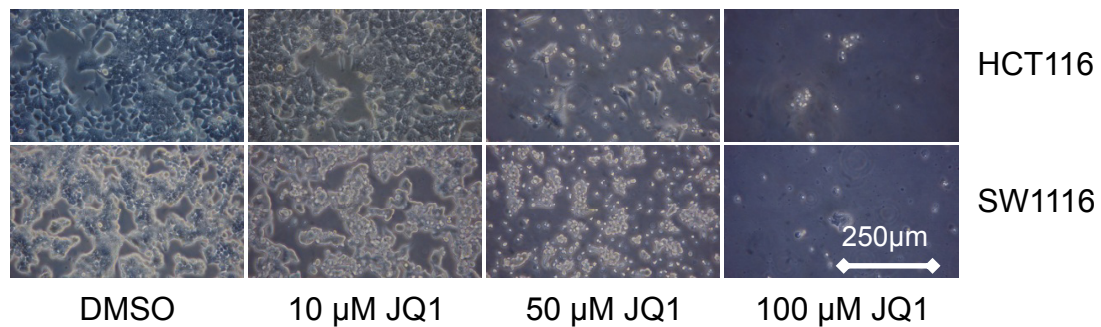

B

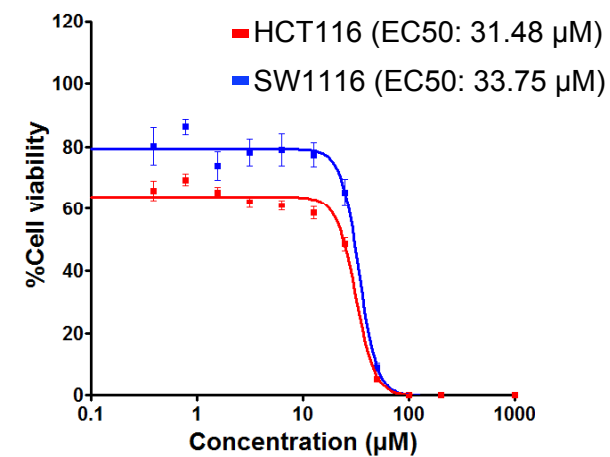

C

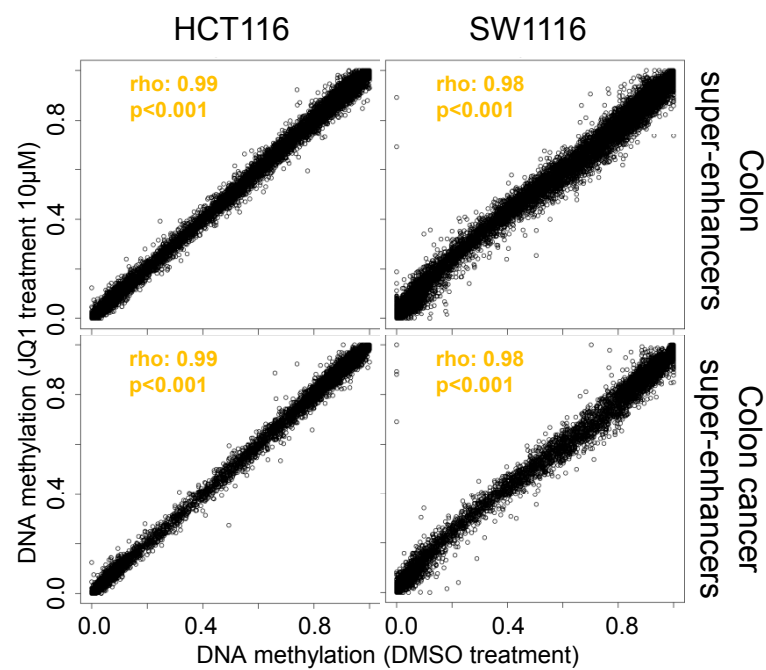

D

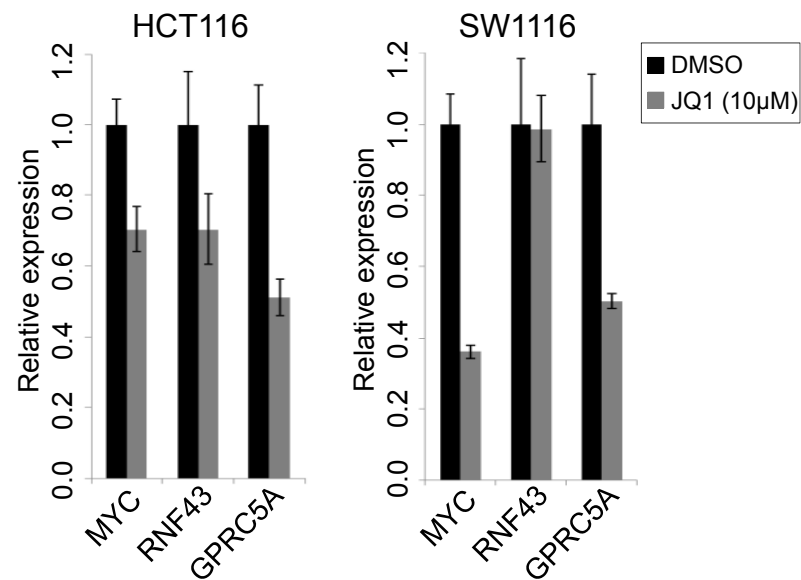

**Supplementary Table 1:** Whole genome bisulfite sequencing of 13 human samples.

|         | Average DNA methylation (SD) |               |               |               | Super-enhancers covered by WGBS |           |           |       |
|---------|------------------------------|---------------|---------------|---------------|---------------------------------|-----------|-----------|-------|
|         | Promoters                    | Exons         | Introns       | Intergenic    | >5% CpGs                        | >20% CpGs | >50% CpGs | Total |
| Colon   | 51.4 (30.62)                 | 81.7 (11.69)  | 81.51 (10.5)  | 74.78 (10.35) | 99.8%                           | 99.5%     | 99.4%     | 1023  |
| Colon_P | 49.82 (29.4)                 | 78.88 (14.38) | 78.67 (13.3)  | 69.32 (12.37) | 99.8%                           | 99.5%     | 99.4%     | 1023  |
| Colon_M | 47.47 (29.07)                | 75.94 (16.75) | 75.61 (15.69) | 64.13 (14)    | 99.8%                           | 99.5%     | 99.4%     | 1023  |
| Breast  | 50.92 (31.57)                | 82.47 (11.87) | 82.92 (10.27) | 76.95 (10.75) | 100.0%                          | 99.8%     | 99.5%     | 1099  |
| 468LN   | 42.3 (29.93)                 | 62.81 (31.32) | 62.77 (30.88) | 41.86 (26.92) | 100.0%                          | 99.8%     | 99.5%     | 1099  |
| 468PT   | 49.14 (31.9)                 | 75.33 (26.65) | 74.67 (26.78) | 59.45 (28.91) | 99.8%                           | 99.6%     | 99.4%     | 1099  |
| Lung    | 52.98 (31.36)                | 84.14 (11.08) | 84.13 (9.71)  | 78.3 (10.19)  | 99.8%                           | 99.6%     | 99.1%     | 1286  |
| H1437   | 42.08 (30.82)                | 68.65 (28.49) | 67.85 (28.34) | 47.52 (26.64) | 99.8%                           | 99.5%     | 99.1%     | 1286  |
| H157    | 40.94 (31.33)                | 65.85 (33.87) | 65.69 (33.54) | 37.96 (26.85) | 99.8%                           | 99.5%     | 99.2%     | 1286  |
| H1672   | 50.36 (32.54)                | 79.44 (22.5)  | 79.97 (21.54) | 63.67 (27.99) | 99.8%                           | 99.6%     | 99.1%     | 1286  |
| Brain   | 54.51 (32.2)                 | 85.58 (12.2)  | 85.82 (10.44) | 82.14 (10.89) | 100.0%                          | 99.9%     | 99.6%     | 1067  |
| U87MG   | 47.28 (29.61)                | 71.43 (25.9)  | 71.73 (24.88) | 52.85 (26.19) | 100.0%                          | 99.9%     | 99.6%     | 1067  |
| CD19    | 55.14 (31.8)                 | 86.13 (11.6)  | 85.86 (10.18) | 80.14 (10.38) | 100.0%                          | 99.6%     | 99.0%     | 688   |

**Supplementary Table 2: Tissue-specific DNA methylation at super-enhancers in normal tissue types.**

| Tissue | Super-Enhancer |           |           | Transcript ID     | Gene       | HMR coverage (%) |        |            |
|--------|----------------|-----------|-----------|-------------------|------------|------------------|--------|------------|
|        | Chr.           | Start     | End       |                   |            | Tissue           | Others | Difference |
| Brain  | 6              | 163815822 | 163882069 | ENST00000537883.1 | QKI        | 0.79             | 0.13   | 0.66       |
| Brain  | 7              | 29516606  | 29530680  | ENST00000410098.1 | CHN2       | 0.63             | 0.04   | 0.59       |
| Brain  | 1              | 161160323 | 161173936 | ENST00000478866.1 | NDUFS2     | 0.80             | 0.21   | 0.59       |
| Brain  | 13             | 78291692  | 78329377  | ENST00000358679.2 | SLAIN1     | 0.59             | 0.00   | 0.59       |
| Brain  | 12             | 110152218 | 110181906 | ENST00000358906.3 | FAM222A    | 0.66             | 0.08   | 0.58       |
| Brain  | 17             | 79097124  | 79111085  | ENST00000575363.1 | AATK       | 0.59             | 0.03   | 0.56       |
| Brain  | 22             | 46467856  | 46491390  | ENST00000360737.3 | MIRLET7    | 0.95             | 0.42   | 0.54       |
| Brain  | 18             | 74684916  | 74780601  | ENST00000583266.1 | MBP        | 0.53             | 0.04   | 0.49       |
| Brain  | 9              | 131142171 | 131157912 | ENST00000483206.1 | URM1       | 0.49             | 0.01   | 0.48       |
| Brain  | 11             | 61520065  | 61534843  | ENST00000265460.5 | MYRF       | 0.53             | 0.06   | 0.47       |
| Brain  | 7              | 124359038 | 124407316 | ENST00000303921.2 | GPR37      | 0.51             | 0.05   | 0.46       |
| Brain  | 18             | 13610336  | 13640017  | ENST00000435606.1 | LDLRAD4    | 0.53             | 0.08   | 0.45       |
| Brain  | 22             | 46457577  | 46466999  | ENST00000396008.2 | MIRLET7    | 0.94             | 0.50   | 0.44       |
| Brain  | 22             | 46457577  | 46466999  | ENST00000333761.1 | MIRLET7    | 0.94             | 0.50   | 0.44       |
| Brain  | 9              | 130697475 | 130743184 | ENST00000494606.1 | FAM102A    | 0.61             | 0.17   | 0.44       |
| Brain  | 10             | 14577374  | 14624047  | ENST00000495292.1 | FAM107B    | 0.46             | 0.02   | 0.44       |
| Brain  | 13             | 67782754  | 67806323  | ENST00000377861.3 | PCDH9      | 0.59             | 0.20   | 0.39       |
| Brain  | 3              | 33685210  | 33704614  | ENST00000486796.1 | CLASP2     | 0.45             | 0.06   | 0.39       |
| Brain  | 5              | 36599886  | 36615091  | ENST00000509272.1 | SLC1A3     | 0.50             | 0.11   | 0.38       |
| Brain  | 21             | 17441409  | 17461338  | ENST00000478932.1 | USP25      | 0.43             | 0.04   | 0.38       |
| Brain  | 8              | 120648911 | 120687423 | ENST00000427067.2 | ENPP2      | 0.41             | 0.04   | 0.37       |
| Brain  | 7              | 22212818  | 22261220  | ENST00000420196.1 | RAPGEF5    | 0.37             | 0.00   | 0.37       |
| Brain  | 16             | 1013186   | 1042763   | ENST00000566034.1 | SOX8       | 0.55             | 0.19   | 0.36       |
| Brain  | 22             | 38361166  | 38471689  | ENST00000494434.1 | PICK1      | 0.39             | 0.03   | 0.36       |
| Brain  | 9              | 140081775 | 140094696 | ENST00000477345.1 | TPRN       | 0.56             | 0.20   | 0.35       |
| Brain  | 18             | 60417206  | 60470491  | ENST00000497351.1 | PHLPP1     | 0.35             | 0.00   | 0.35       |
| Brain  | 8              | 26427962  | 26519962  | ENST00000474808.1 | DPYSL2     | 0.45             | 0.10   | 0.35       |
| Brain  | 1              | 198871424 | 198907549 | ENST00000491302.1 | PTPRC      | 0.48             | 0.13   | 0.35       |
| Brain  | 17             | 36570707  | 36622668  | ENST00000443378.1 | ARHGAP23   | 0.54             | 0.20   | 0.34       |
| Brain  | 3              | 72424289  | 72464834  | ENST00000477973.1 | RYBP       | 0.34             | 0.00   | 0.34       |
| Brain  | 6              | 134488737 | 134505092 | ENST00000525700.1 | SGK1       | 0.60             | 0.27   | 0.34       |
| Brain  | 10             | 81137824  | 81212605  | ENST00000372333.3 | ZCCHC24    | 0.43             | 0.09   | 0.33       |
| Brain  | 4              | 96452170  | 96474433  | ENST00000504962.1 | UNC5C      | 0.48             | 0.15   | 0.33       |
| Brain  | 16             | 75266933  | 75302422  | ENST00000393422.2 | BCAR1      | 0.51             | 0.18   | 0.33       |
| Brain  | 3              | 39487852  | 39573984  | ENST00000479860.1 | MOBP       | 0.34             | 0.02   | 0.32       |
| Brain  | 4              | 154142334 | 154219000 | ENST00000433687.1 | TRIM2      | 0.38             | 0.05   | 0.32       |
| Brain  | 6              | 163659272 | 163687676 | ENST00000419182.1 | AL078585.1 | 0.36             | 0.04   | 0.32       |
| Brain  | 10             | 88421359  | 88444547  | ENST00000542786.1 | LDB3       | 0.33             | 0.02   | 0.31       |
| Brain  | 12             | 48167031  | 48182319  | ENST00000599515.1 | AC004466.1 | 0.40             | 0.10   | 0.31       |
| Brain  | 2              | 145129528 | 145283099 | ENST00000475115.1 | ZEB2       | 0.39             | 0.08   | 0.30       |
| Brain  | 4              | 134065738 | 134085565 | ENST00000511112.1 | PCDH10     | 0.73             | 0.42   | 0.30       |
| Brain  | 1              | 160068777 | 160077945 | ENST00000448417.1 | IGSF8      | 0.44             | 0.14   | 0.30       |
| Brain  | 2              | 127806748 | 127912517 | ENST00000409400.1 | BIN1       | 0.36             | 0.06   | 0.30       |
| Brain  | 3              | 181403893 | 181455295 | ENST00000325404.1 | SOX2       | 0.84             | 0.56   | 0.28       |
| Brain  | 16             | 19841311  | 19898686  | ENST00000564449.1 | GPRC5B     | 0.35             | 0.06   | 0.28       |
| Brain  | 6              | 30844750  | 30864481  | ENST00000514434.1 | DDR1       | 0.45             | 0.18   | 0.27       |
| Brain  | 4              | 115547254 | 115584118 | ENST00000394511.3 | UGT8       | 0.27             | 0.00   | 0.27       |
| Brain  | 14             | 77765872  | 77789479  | ENST00000555093.1 | GSTZ1      | 0.39             | 0.12   | 0.27       |
| Brain  | 10             | 650150    | 686281    | ENST00000441152.2 | PRR26      | 0.31             | 0.03   | 0.27       |
| Brain  | 8              | 53318133  | 53342376  | ENST00000520716.1 | ST18       | 0.29             | 0.02   | 0.27       |
| Brain  | 2              | 220142124 | 220157631 | ENST00000460801.1 | PTPRN      | 0.43             | 0.16   | 0.27       |
| Brain  | 3              | 170135527 | 170167574 | ENST00000488989.1 | CLDN11     | 0.34             | 0.07   | 0.27       |
| Brain  | 17             | 68152783  | 68183190  | ENST00000243457.3 | KCNJ2      | 0.38             | 0.11   | 0.27       |
| Brain  | 21             | 48018786  | 48058971  | ENST00000440086.1 | PRMT2      | 0.35             | 0.09   | 0.26       |
| Brain  | 19             | 13093539  | 13211813  | ENST00000588680.1 | NFIX       | 0.47             | 0.21   | 0.26       |
| Brain  | 14             | 50976072  | 51001976  | ENST00000441560.2 | ATL1       | 0.36             | 0.11   | 0.26       |
| Brain  | 5              | 173313778 | 173354104 | ENST00000519467.1 | CPEB4      | 0.34             | 0.08   | 0.25       |
| Brain  | 3              | 134072004 | 134096230 | ENST00000502491.1 | AMOTL2     | 0.44             | 0.19   | 0.25       |
| Brain  | 22             | 37940770  | 37968154  | ENST00000434728.1 | CDC42EP1   | 0.50             | 0.25   | 0.25       |
| Brain  | 2              | 164566271 | 164594418 | ENST00000482917.1 | FIGN       | 0.35             | 0.11   | 0.25       |
| Brain  | 15             | 64974641  | 64996542  | ENST00000559665.2 | OAZ2       | 0.36             | 0.11   | 0.24       |
| Brain  | 1              | 65712720  | 65745163  | ENST00000483402.1 | DNAJC6     | 0.34             | 0.10   | 0.24       |

|       |    |           |           |                   |           |      |      |      |
|-------|----|-----------|-----------|-------------------|-----------|------|------|------|
| Brain | 13 | 101281681 | 101326566 | ENST00000480433.1 | TMTC4     | 0.26 | 0.02 | 0.24 |
| Brain | 11 | 67173218  | 67188540  | ENST00000531388.1 | CARNS1    | 0.45 | 0.21 | 0.24 |
| Brain | 2  | 158160059 | 158191916 | ENST00000419116.2 | ERMN      | 0.24 | 0.00 | 0.24 |
| Brain | 11 | 111845328 | 111865086 | ENST00000530645.1 | DIXDC1    | 0.33 | 0.09 | 0.24 |
| Brain | 5  | 126625320 | 126648566 | ENST00000274473.6 | MEGF10    | 0.30 | 0.06 | 0.24 |
| Brain | 1  | 221879013 | 221917508 | ENST00000477026.1 | DUSP10    | 0.32 | 0.09 | 0.23 |
| Brain | 10 | 22858862  | 22973344  | ENST00000432610.1 | PIP4K2A   | 0.25 | 0.02 | 0.23 |
| Brain | 7  | 28724048  | 28800494  | ENST00000468813.1 | CREB5     | 0.27 | 0.04 | 0.23 |
| Brain | 2  | 105022517 | 105068208 | ENST00000361360.2 | POU3F3    | 0.24 | 0.01 | 0.23 |
| Brain | 22 | 39853661  | 39873571  | ENST00000418314.1 | MGAT3     | 0.34 | 0.11 | 0.23 |
| Brain | 9  | 97831315  | 97861405  | ENST00000468164.1 | C9orf3    | 0.25 | 0.02 | 0.23 |
| Brain | 1  | 202090299 | 202115217 | ENST00000272217.2 | ARL8A     | 0.39 | 0.17 | 0.23 |
| Brain | 16 | 56277138  | 56298622  | ENST00000563440.1 | GNAO1     | 0.24 | 0.02 | 0.22 |
| Brain | 5  | 132105879 | 132116081 | ENST00000492490.1 | 8-Sep     | 0.43 | 0.21 | 0.22 |
| Brain | 13 | 107142225 | 107162158 | ENST00000245323.4 | EFNB2     | 0.29 | 0.07 | 0.22 |
| Brain | 2  | 102312024 | 102465976 | ENST00000421882.1 | MAP4K4    | 0.26 | 0.04 | 0.22 |
| Brain | 10 | 73722545  | 73806874  | ENST00000373115.4 | CHST3     | 0.28 | 0.06 | 0.22 |
| Brain | 4  | 48622532  | 48657738  | ENST00000302806.5 | FRYL      | 0.22 | 0.00 | 0.21 |
| Brain | 1  | 160047565 | 160068437 | ENST00000460351.1 | IGSF8     | 0.35 | 0.14 | 0.21 |
| Brain | 10 | 126400866 | 126432679 | ENST00000392754.3 | FAM53B    | 0.40 | 0.19 | 0.21 |
| Brain | 9  | 133698900 | 133750533 | ENST00000318560.5 | ABL1      | 0.29 | 0.08 | 0.21 |
| Brain | 17 | 40114067  | 40162277  | ENST00000591153.1 | DNAJC7    | 0.27 | 0.07 | 0.20 |
| Brain | 16 | 57277838  | 57336233  | ENST00000569059.1 | PLLP      | 0.30 | 0.10 | 0.20 |
| Brain | 10 | 64127809  | 64167185  | ENST00000421210.1 | ZNF365    | 0.23 | 0.03 | 0.20 |
| Brain | 3  | 133460192 | 133484110 | ENST00000498622.1 | TF        | 0.24 | 0.04 | 0.20 |
| Brain | 1  | 109889550 | 109945440 | ENST00000471996.1 | SORT1     | 0.26 | 0.05 | 0.20 |
| Brain | 14 | 65146034  | 65196928  | ENST00000556801.1 | PLEKHG3   | 0.31 | 0.11 | 0.20 |
| Brain | 10 | 128242317 | 128261039 | ENST00000368674.1 | C10orf90  | 0.24 | 0.04 | 0.20 |
| Brain | 17 | 72226877  | 72248627  | ENST00000526858.1 | TTYH2     | 0.23 | 0.03 | 0.20 |
| Brain | 22 | 45603349  | 45638976  | ENST00000417906.1 | KIAA0930  | 0.27 | 0.08 | 0.20 |
| Brain | 1  | 205461954 | 205494873 | ENST00000505932.1 | CDK18     | 0.26 | 0.06 | 0.20 |
| Brain | 2  | 74591442  | 74620177  | ENST00000440727.1 | DCTN1     | 0.27 | 0.07 | 0.20 |
| Brain | 10 | 124216441 | 124276238 | ENST00000420892.1 | HTRA1     | 0.27 | 0.07 | 0.20 |
| Brain | 19 | 54921528  | 54950915  | ENST00000467939.1 | TTYH1     | 0.38 | 0.18 | 0.20 |
| Brain | 20 | 35445944  | 35496093  | ENST00000357779.3 | SOGA1     | 0.30 | 0.11 | 0.20 |
| Brain | 6  | 41649397  | 41702285  | ENST00000433032.1 | TFEB      | 0.30 | 0.10 | 0.20 |
| Brain | 2  | 95678307  | 95745847  | ENST00000349807.3 | MAL       | 0.27 | 0.08 | 0.19 |
| Brain | 20 | 31025912  | 31074699  | ENST00000326071.4 | C20orf112 | 0.35 | 0.16 | 0.19 |
| Brain | 15 | 45655307  | 45688573  | ENST00000558118.1 | GATM      | 0.24 | 0.05 | 0.19 |
| Brain | 4  | 113802567 | 113832361 | ENST00000503271.1 | ANK2      | 0.21 | 0.02 | 0.19 |
| Brain | 4  | 113802567 | 113832361 | ENST00000503423.1 | ANK2      | 0.21 | 0.02 | 0.19 |
| Brain | 4  | 113802567 | 113832361 | ENST00000506722.1 | ANK2      | 0.21 | 0.02 | 0.19 |
| Brain | 1  | 214156400 | 214205391 | ENST00000261454.4 | PROX1     | 0.32 | 0.13 | 0.19 |
| Brain | 10 | 126679464 | 126714232 | ENST00000486955.2 | CTBP2     | 0.23 | 0.04 | 0.19 |
| Brain | 1  | 109816196 | 109827024 | ENST00000471740.1 | PSRC1     | 0.36 | 0.17 | 0.19 |
| Brain | 1  | 66414430  | 66466650  | ENST00000526666.1 | PDE4B     | 0.20 | 0.02 | 0.18 |
| Brain | 1  | 90285126  | 90311060  | ENST00000527156.1 | LRRC8D    | 0.33 | 0.14 | 0.18 |
| Brain | 11 | 124785353 | 124817909 | ENST00000528971.1 | HEPACAM   | 0.20 | 0.02 | 0.18 |
| Brain | 1  | 230932874 | 231004412 | ENST00000366663.5 | C1orf198  | 0.21 | 0.03 | 0.18 |
| Brain | 1  | 204796255 | 204866707 | ENST00000514644.1 | NFASC     | 0.21 | 0.03 | 0.18 |
| Brain | 7  | 30174536  | 30225450  | ENST00000455738.1 | C7orf41   | 0.23 | 0.06 | 0.18 |
| Brain | 17 | 79345155  | 79376776  | ENST00000307745.7 | BAHCC1    | 0.54 | 0.37 | 0.17 |
| Brain | 17 | 73682578  | 73702695  | ENST00000579005.1 | SAP30BP   | 0.22 | 0.05 | 0.17 |
| Brain | 5  | 124064380 | 124097267 | ENST00000512940.1 | ZNF608    | 0.41 | 0.24 | 0.17 |
| Brain | 19 | 50985631  | 51019282  | ENST00000598657.1 | ASPDH     | 0.28 | 0.11 | 0.17 |
| Brain | 7  | 32078425  | 32118455  | ENST00000464881.1 | PDE1C     | 0.23 | 0.06 | 0.17 |
| Brain | 12 | 123317747 | 123395518 | ENST00000371248.3 | VPS37B    | 0.30 | 0.13 | 0.17 |
| Brain | 9  | 135976307 | 136024639 | ENST00000372062.3 | RALGDS    | 0.33 | 0.16 | 0.17 |
| Brain | 17 | 56589712  | 56620235  | ENST00000582976.1 | 4-Sep     | 0.36 | 0.19 | 0.17 |
| Brain | 11 | 63801514  | 63883871  | ENST00000246841.3 | FLRT1     | 0.21 | 0.05 | 0.17 |
| Brain | 6  | 69337682  | 69367340  | ENST00000370598.1 | BAI3      | 0.33 | 0.16 | 0.17 |
| Brain | 12 | 26265040  | 26280746  | ENST00000534829.1 | SSPN      | 0.64 | 0.47 | 0.17 |
| Brain | 20 | 45187487  | 45213480  | ENST00000464518.1 | SLC13A3   | 0.22 | 0.05 | 0.17 |
| Brain | 3  | 11024732  | 11080079  | ENST00000495636.1 | SLC6A1    | 0.23 | 0.06 | 0.17 |
| Brain | 1  | 160161970 | 160191690 | ENST00000481831.1 | DCAF8     | 0.25 | 0.09 | 0.17 |
| Brain | 1  | 160019557 | 160042341 | ENST00000368089.3 | KCNJ10    | 0.23 | 0.07 | 0.16 |
| Brain | 18 | 13548488  | 13588929  | ENST00000592657.1 | LDLRAD4   | 0.21 | 0.05 | 0.16 |

|       |    |           |           |                   |          |      |      |      |
|-------|----|-----------|-----------|-------------------|----------|------|------|------|
| Brain | 9  | 8840393   | 8880342   | ENST00000481079.1 | PTPRD    | 0.24 | 0.08 | 0.16 |
| Brain | 7  | 141373362 | 141403139 | ENST00000482493.1 | KIAA1147 | 0.22 | 0.06 | 0.16 |
| Brain | 1  | 149967151 | 149985599 | ENST00000417191.1 | OTUD7B   | 0.27 | 0.11 | 0.16 |
| Brain | 4  | 77099124  | 77138142  | ENST00000512895.1 | FAM47E   | 0.30 | 0.14 | 0.16 |
| Brain | 22 | 46445235  | 46456789  | ENST00000381051.2 | MIRLET7  | 0.63 | 0.47 | 0.16 |
| Brain | 10 | 699249    | 735394    | ENST00000280886.6 | DIP2C    | 0.21 | 0.05 | 0.16 |
| Brain | 10 | 73574974  | 73621362  | ENST00000394934.1 | PSAP     | 0.21 | 0.05 | 0.15 |
| Brain | 17 | 27071068  | 27095625  | ENST00000584059.1 | FAM222B  | 0.29 | 0.14 | 0.15 |
| Brain | 11 | 134254603 | 134298147 | ENST00000531510.1 | B3GAT1   | 0.26 | 0.11 | 0.15 |
| Brain | 13 | 97862565  | 97936838  | ENST00000445661.2 | MBNL2    | 0.24 | 0.09 | 0.15 |
| Brain | 14 | 90845063  | 90876551  | ENST00000556721.1 | CALM1    | 0.35 | 0.20 | 0.15 |
| Brain | 2  | 193010308 | 193063844 | ENST00000409056.3 | TMEFF2   | 0.21 | 0.06 | 0.15 |
| Brain | 3  | 156845617 | 156856684 | ENST00000467849.1 | CCNL1    | 0.30 | 0.15 | 0.15 |
| Brain | 1  | 155828272 | 155864174 | ENST00000539162.1 | SYT11    | 0.21 | 0.06 | 0.15 |
| Brain | 7  | 45111554  | 45132881  | ENST00000490531.2 | NACAD    | 0.22 | 0.07 | 0.15 |
| Brain | 6  | 166689003 | 166721330 | ENST00000322583.3 | PRR18    | 0.20 | 0.05 | 0.15 |
| Brain | 1  | 205626881 | 205650899 | ENST00000367145.3 | SLC45A3  | 0.29 | 0.14 | 0.15 |
| Brain | 9  | 14299740  | 14327190  | ENST00000493697.1 | NFIB     | 0.57 | 0.42 | 0.15 |
| Brain | 17 | 38216903  | 38234316  | ENST00000577486.1 | THRA     | 0.63 | 0.48 | 0.15 |
| Brain | 9  | 124022263 | 124092639 | ENST00000477553.1 | GSN      | 0.26 | 0.12 | 0.15 |
| Brain | 13 | 114786201 | 114844487 | ENST00000389544.4 | RASA3    | 0.21 | 0.06 | 0.15 |
| Brain | 11 | 6400761   | 6441884   | ENST00000533407.1 | APBB1    | 0.21 | 0.07 | 0.15 |
| Brain | 1  | 205195003 | 205257756 | ENST00000481950.1 | TMCC2    | 0.23 | 0.09 | 0.14 |
| Brain | 1  | 33789227  | 33859751  | ENST00000468406.1 | PHC2     | 0.25 | 0.11 | 0.14 |
| Brain | 6  | 52225169  | 52265846  | ENST00000360726.3 | PAQR8    | 0.21 | 0.07 | 0.14 |
| Brain | 5  | 115856316 | 115912087 | ENST00000512156.1 | SEMA6A   | 0.23 | 0.08 | 0.14 |
| Brain | 17 | 17638844  | 17657613  | ENST00000395774.1 | RAI1     | 0.30 | 0.16 | 0.14 |
| Brain | 5  | 139012918 | 139146609 | ENST00000505812.1 | CXXC5    | 0.36 | 0.22 | 0.14 |
| Brain | 16 | 15234031  | 15244187  | ENST00000448014.2 | NPIPP1   | 0.27 | 0.13 | 0.14 |
| Brain | 16 | 15234031  | 15244187  | ENST00000358815.3 | NPIPP1   | 0.27 | 0.13 | 0.14 |
| Brain | 17 | 76857381  | 76931557  | ENST00000262768.7 | TIMP2    | 0.23 | 0.09 | 0.14 |
| Brain | 17 | 57405868  | 57485233  | ENST00000582813.1 | YPEL2    | 0.20 | 0.06 | 0.14 |
| Brain | 19 | 51033029  | 51070726  | ENST00000599957.1 | LRRC4B   | 0.30 | 0.17 | 0.14 |
| Brain | 17 | 42161429  | 42202224  | ENST00000587135.1 | HDAC5    | 0.23 | 0.10 | 0.14 |
| Brain | 1  | 110071934 | 110092553 | ENST00000369851.4 | GNAI3    | 0.31 | 0.18 | 0.13 |
| Brain | 12 | 49579740  | 49630368  | ENST00000552125.1 | TUBA1C   | 0.23 | 0.09 | 0.13 |
| Brain | 1  | 61541625  | 61624014  | ENST00000496712.1 | NFIA     | 0.24 | 0.11 | 0.13 |
| Brain | 14 | 51524492  | 51564122  | ENST00000360392.4 | TRIM9    | 0.20 | 0.07 | 0.13 |
| Brain | 3  | 123128250 | 123170404 | ENST00000462833.1 | ADCY5    | 0.20 | 0.08 | 0.13 |
| Brain | 11 | 118463235 | 118534958 | ENST00000528823.1 | PHLDB1   | 0.23 | 0.10 | 0.13 |
| Brain | 10 | 102752997 | 102775915 | ENST00000454422.1 | LZTS2    | 0.44 | 0.32 | 0.13 |
| Brain | 11 | 73357627  | 73375282  | ENST00000544282.1 | PLEKHB1  | 0.20 | 0.08 | 0.13 |
| Brain | 7  | 86272604  | 86301105  | ENST00000421579.1 | GRM3     | 0.22 | 0.09 | 0.13 |
| Brain | 1  | 32792421  | 32824727  | ENST00000574315.1 | TSSK3    | 0.27 | 0.14 | 0.12 |
| Brain | 15 | 37371561  | 37406086  | ENST00000559129.1 | MEIS2    | 0.46 | 0.33 | 0.12 |
| Brain | 15 | 43800300  | 43824728  | ENST00000300231.5 | MAP1A    | 0.28 | 0.16 | 0.12 |
| Brain | 5  | 171829492 | 171881486 | ENST00000519643.1 | SH3PXD2B | 0.21 | 0.09 | 0.12 |
| Brain | 11 | 119211319 | 119250680 | ENST00000527843.1 | USP2     | 0.22 | 0.10 | 0.12 |
| Brain | 5  | 646895    | 697805    | ENST00000360578.5 | TPPP     | 0.23 | 0.12 | 0.12 |
| Brain | 2  | 232526039 | 232554844 | ENST00000466801.1 | PTMA     | 0.34 | 0.23 | 0.12 |
| Brain | 10 | 72971329  | 73044360  | ENST00000373192.4 | UNC5B    | 0.21 | 0.09 | 0.12 |
| Brain | 10 | 24989499  | 25014855  | ENST00000463892.1 | ARHGAP21 | 0.33 | 0.22 | 0.12 |
| Brain | 2  | 9768796   | 9795405   | ENST00000460093.1 | YWHAQ    | 0.21 | 0.09 | 0.11 |
| Brain | 16 | 1064221   | 1098971   | ENST00000397547.2 | SSTR5    | 0.24 | 0.13 | 0.11 |
| Brain | 19 | 17858364  | 17882158  | ENST00000600393.1 | FCHO1    | 0.22 | 0.11 | 0.11 |
| Brain | 12 | 6639174   | 6665533   | ENST00000396830.2 | IFFO1    | 0.40 | 0.29 | 0.11 |
| Brain | 10 | 111967550 | 111992938 | ENST00000369612.1 | MXI1     | 0.40 | 0.29 | 0.11 |
| Brain | 17 | 48914258  | 48946511  | ENST00000509385.1 | TOB1     | 0.28 | 0.17 | 0.11 |
| Brain | 17 | 38258962  | 38270871  | ENST00000246672.3 | NR1D1    | 0.42 | 0.31 | 0.11 |
| Brain | 9  | 139405020 | 139447486 | ENST00000277541.6 | NOTCH1   | 0.32 | 0.21 | 0.11 |
| Brain | 6  | 15245470  | 15269892  | ENST00000397311.3 | JARID2   | 0.36 | 0.25 | 0.11 |
| Brain | 12 | 1752842   | 1776949   | ENST00000545747.1 | WNT5B    | 0.24 | 0.13 | 0.11 |
| Brain | 6  | 128798636 | 128843173 | ENST00000368202.4 | PTPRK    | 0.20 | 0.09 | 0.11 |
| Brain | 10 | 88108134  | 88126246  | ENST00000327946.7 | GRID1    | 0.29 | 0.19 | 0.11 |
| Brain | 1  | 156353833 | 156405678 | ENST00000495000.1 | C1orf61  | 0.29 | 0.18 | 0.11 |
| Brain | 21 | 34399873  | 34453980  | ENST00000498799.1 | OLIG1    | 0.28 | 0.18 | 0.11 |
| Brain | 20 | 45922895  | 45992027  | ENST00000441977.1 | ZMYND8   | 0.24 | 0.13 | 0.11 |

|        |    |           |           |                   |            |      |      |      |
|--------|----|-----------|-----------|-------------------|------------|------|------|------|
| Brain  | 21 | 43639119  | 43683392  | ENST00000340588.4 | ABCG1      | 0.22 | 0.11 | 0.11 |
| Brain  | 17 | 76703832  | 76732967  | ENST00000590300.1 | CYTH1      | 0.24 | 0.14 | 0.10 |
| Brain  | 3  | 69130585  | 69168856  | ENST00000485444.1 | ARL6IP5    | 0.22 | 0.12 | 0.10 |
| Brain  | 19 | 30713867  | 30786928  | ENST00000591488.1 | ZNF536     | 0.21 | 0.11 | 0.10 |
| Brain  | 12 | 48125991  | 48140168  | ENST00000395360.2 | RAPGEF3    | 0.20 | 0.10 | 0.10 |
| Breast | 22 | 46467114  | 46488203  | ENST00000360737.3 | MIRLET7    | 1.00 | 0.47 | 0.53 |
| Breast | 5  | 131593100 | 131603174 | ENST00000418373.1 | PDLIM4     | 0.60 | 0.08 | 0.51 |
| Breast | 11 | 8828385   | 8837469   | ENST00000531237.1 | ST5        | 0.63 | 0.12 | 0.51 |
| Breast | 22 | 46448058  | 46467049  | ENST00000381051.2 | MIRLET7    | 1.00 | 0.50 | 0.50 |
| Breast | 9  | 33157786  | 33167403  | ENST00000379731.4 | B4GALT1    | 0.92 | 0.42 | 0.50 |
| Breast | 12 | 10868156  | 10877012  | ENST00000540747.1 | CSDA       | 0.79 | 0.29 | 0.50 |
| Breast | 1  | 157964217 | 157991843 | ENST00000416935.2 | KIRREL     | 0.50 | 0.04 | 0.47 |
| Breast | 12 | 6479020   | 6487672   | ENST00000539925.1 | LTBR       | 0.57 | 0.12 | 0.46 |
| Breast | 3  | 29321550  | 29334286  | ENST00000456853.1 | RBMS3      | 0.65 | 0.21 | 0.45 |
| Breast | 5  | 142773722 | 142785691 | ENST00000502500.1 | NR3C1      | 0.95 | 0.51 | 0.44 |
| Breast | 1  | 153579895 | 153590703 | ENST00000469571.1 | S100A14    | 0.49 | 0.05 | 0.44 |
| Breast | 15 | 42562799  | 42569003  | ENST00000567421.1 | GANC       | 0.91 | 0.51 | 0.40 |
| Breast | 4  | 146653244 | 146658422 | ENST00000510096.1 | C4orf51    | 0.68 | 0.29 | 0.39 |
| Breast | 1  | 45270631  | 45276266  | ENST00000482715.1 | BTBD19     | 0.65 | 0.27 | 0.38 |
| Breast | 1  | 156065471 | 156100930 | ENST00000392353.3 | LMNA       | 0.56 | 0.18 | 0.38 |
| Breast | 2  | 239193425 | 239200323 | ENST00000431832.1 | PER2       | 0.73 | 0.36 | 0.37 |
| Breast | 2  | 36579464  | 36605312  | ENST00000473403.1 | CRIM1      | 0.55 | 0.19 | 0.35 |
| Breast | 18 | 3622231   | 3626476   | ENST00000486430.1 | DLGAP1     | 0.52 | 0.17 | 0.35 |
| Breast | 21 | 36252652  | 36264673  | ENST00000399237.2 | RUNX1      | 0.93 | 0.58 | 0.35 |
| Breast | 1  | 33792562  | 33815439  | ENST00000473158.1 | PHC2       | 0.49 | 0.16 | 0.33 |
| Breast | 10 | 24737918  | 24757794  | ENST00000376451.2 | KIAA1217   | 0.37 | 0.04 | 0.33 |
| Breast | 8  | 26465475  | 26470176  | ENST00000523690.1 | DPYSL2     | 0.73 | 0.40 | 0.32 |
| Breast | 3  | 141083866 | 141089271 | ENST00000507657.1 | ZBTB38     | 0.39 | 0.08 | 0.32 |
| Breast | 1  | 154941228 | 154949531 | ENST00000473344.1 | CKS1B      | 0.82 | 0.52 | 0.31 |
| Breast | 7  | 115993193 | 115998892 | ENST00000465451.1 | CAV2       | 0.37 | 0.07 | 0.30 |
| Breast | 14 | 77489392  | 77513614  | ENST00000238647.3 | IRF2BPL    | 0.67 | 0.37 | 0.29 |
| Breast | 14 | 69402525  | 69445588  | ENST00000553659.1 | ACTN1      | 0.35 | 0.06 | 0.29 |
| Breast | 20 | 51581498  | 51597746  | ENST00000371497.4 | TSHZ2      | 0.45 | 0.16 | 0.29 |
| Breast | 7  | 55085115  | 55095372  | ENST00000463948.1 | EGFR       | 0.50 | 0.21 | 0.29 |
| Breast | 9  | 14298144  | 14323961  | ENST00000493697.1 | NFIB       | 0.71 | 0.42 | 0.28 |
| Breast | 1  | 27830256  | 27900464  | ENST00000487743.2 | AHDC1      | 0.37 | 0.09 | 0.28 |
| Breast | 8  | 145008274 | 145031982 | ENST00000527816.1 | PLEC       | 0.62 | 0.34 | 0.27 |
| Breast | 11 | 62306073  | 62328249  | ENST00000531324.1 | AHNAK      | 0.61 | 0.34 | 0.27 |
| Breast | 7  | 27134577  | 27144793  | ENST00000222718.5 | HOXA2      | 0.95 | 0.68 | 0.27 |
| Breast | 20 | 10634437  | 10656669  | ENST00000254958.4 | JAG1       | 0.49 | 0.22 | 0.27 |
| Breast | 15 | 93425946  | 93432559  | ENST00000555520.1 | CHD2       | 0.87 | 0.61 | 0.26 |
| Breast | 11 | 6339234   | 6344196   | ENST00000530979.1 | PRKCDBP    | 0.61 | 0.34 | 0.26 |
| Breast | 8  | 116659885 | 116682409 | ENST00000451156.1 | TRPS1      | 0.42 | 0.17 | 0.26 |
| Breast | 1  | 59245181  | 59252471  | ENST00000371222.2 | JUN        | 0.86 | 0.61 | 0.25 |
| Breast | 12 | 120661774 | 120703620 | ENST00000547772.1 | PXN        | 0.36 | 0.10 | 0.25 |
| Breast | 11 | 114162169 | 114180527 | ENST00000545255.1 | NNMT       | 0.26 | 0.03 | 0.24 |
| Breast | 10 | 122913683 | 122920721 | ENST00000478567.1 | WDR11      | 0.38 | 0.16 | 0.22 |
| Breast | 4  | 77506454  | 77513253  | ENST00000484236.1 | SHROOM3    | 0.31 | 0.09 | 0.22 |
| Breast | 12 | 59300121  | 59315174  | ENST00000548968.1 | LRIG3      | 0.39 | 0.18 | 0.21 |
| Breast | 1  | 100109973 | 100129273 | ENST00000263174.4 | PALMD      | 0.24 | 0.03 | 0.21 |
| Breast | 1  | 60135366  | 60141479  | ENST00000471169.1 | FGGY       | 0.24 | 0.03 | 0.21 |
| Breast | 5  | 121515651 | 121520476 | ENST00000514925.1 | ZNF474     | 0.26 | 0.06 | 0.21 |
| Breast | 6  | 74224616  | 74234296  | ENST00000455918.1 | EEF1A1     | 0.79 | 0.59 | 0.21 |
| Breast | 11 | 9586185   | 9600407   | ENST00000524612.1 | WEE1       | 0.46 | 0.26 | 0.21 |
| Breast | 20 | 43963799  | 43990114  | ENST00000537976.1 | SDC4       | 0.33 | 0.13 | 0.21 |
| Breast | 19 | 13123147  | 13172690  | ENST00000358552.3 | NFIX       | 0.50 | 0.29 | 0.20 |
| Breast | 14 | 105432978 | 105441663 | ENST00000555122.1 | AHNAK2     | 0.43 | 0.23 | 0.20 |
| Breast | 17 | 2294949   | 2311496   | ENST00000571836.2 | MNT        | 0.62 | 0.42 | 0.20 |
| Breast | 11 | 57528367  | 57568939  | ENST00000534647.1 | CTNND1     | 0.31 | 0.11 | 0.20 |
| Breast | 1  | 144706472 | 144710218 | ENST00000338347.4 | NBPF9      | 0.32 | 0.12 | 0.20 |
| Breast | 1  | 144706472 | 144710218 | ENST00000440491.2 | NBPF9      | 0.32 | 0.12 | 0.20 |
| Breast | 11 | 65238595  | 65276583  | ENST00000309775.7 | AP000769.1 | 0.63 | 0.43 | 0.20 |
| Breast | 14 | 55568260  | 55575863  | ENST00000553493.1 | LGALS3     | 0.32 | 0.13 | 0.19 |
| Breast | 6  | 121756401 | 121769000 | ENST00000282561.3 | GJA1       | 0.38 | 0.18 | 0.19 |
| Breast | 22 | 30792614  | 30822843  | ENST00000407550.3 | MTFP1      | 0.36 | 0.17 | 0.19 |
| Breast | 12 | 6432600   | 6452223   | ENST00000538363.1 | TNFRSF1A   | 0.50 | 0.30 | 0.19 |
| Breast | 2  | 112249648 | 112262948 | ENST00000371162.4 | AC108463.3 | 0.27 | 0.08 | 0.19 |

|        |    |           |           |                   |            |      |      |      |
|--------|----|-----------|-----------|-------------------|------------|------|------|------|
| Breast | 1  | 181055984 | 181089589 | ENST00000367577.4 | IER5       | 0.32 | 0.13 | 0.19 |
| Breast | 16 | 56638741  | 56649586  | ENST00000567300.1 | MT2A       | 0.46 | 0.27 | 0.19 |
| Breast | 5  | 1881509   | 1890183   | ENST00000513692.1 | IRX4       | 0.97 | 0.78 | 0.19 |
| Breast | 3  | 187453456 | 187468930 | ENST00000496823.1 | BCL6       | 0.81 | 0.63 | 0.19 |
| Breast | 1  | 207190041 | 207209398 | ENST00000461135.2 | C1orf116   | 0.22 | 0.03 | 0.19 |
| Breast | 6  | 111906089 | 111928358 | ENST00000528599.1 | TRAF3IP2   | 0.33 | 0.15 | 0.18 |
| Breast | 22 | 27868674  | 27873807  | ENST00000497225.1 | MN1        | 0.23 | 0.04 | 0.18 |
| Breast | 22 | 36718824  | 36814131  | ENST00000216181.5 | MYH9       | 0.34 | 0.16 | 0.18 |
| Breast | 19 | 49375182  | 49379790  | ENST00000600406.1 | PPP1R15A   | 0.78 | 0.60 | 0.18 |
| Breast | 3  | 193849125 | 193860857 | ENST00000476918.1 | HES1       | 0.79 | 0.61 | 0.18 |
| Breast | 11 | 118779500 | 118810391 | ENST00000534788.1 | UPK2       | 0.63 | 0.45 | 0.18 |
| Breast | 19 | 1154329   | 1184542   | ENST00000587655.1 | SBNO2      | 0.28 | 0.10 | 0.18 |
| Breast | 18 | 3245538   | 3270102   | ENST00000584539.1 | MYL12B     | 0.43 | 0.25 | 0.18 |
| Breast | 14 | 74207241  | 74227902  | ENST00000421708.1 | ELMSAN1    | 0.58 | 0.41 | 0.18 |
| Breast | 14 | 23292133  | 23323062  | ENST00000547596.1 | MMP14      | 0.33 | 0.15 | 0.17 |
| Breast | 10 | 95184875  | 95242959  | ENST00000488645.1 | MYOF       | 0.21 | 0.04 | 0.17 |
| Breast | 14 | 55537362  | 55546494  | ENST00000553976.1 | MAPK1IP1L  | 0.24 | 0.07 | 0.17 |
| Breast | 20 | 52443340  | 52447648  | ENST00000422805.1 | BCAS1      | 0.63 | 0.46 | 0.17 |
| Breast | 17 | 46122636  | 46152031  | ENST00000581319.1 | NFE2L1     | 0.28 | 0.11 | 0.17 |
| Breast | 11 | 66821179  | 66830989  | ENST00000532559.1 | RHOD       | 0.33 | 0.16 | 0.17 |
| Breast | 20 | 34326330  | 34331841  | ENST00000493853.1 | RBM39      | 0.91 | 0.74 | 0.17 |
| Breast | 13 | 48971911  | 48988013  | ENST00000482024.1 | LPAR6      | 0.24 | 0.07 | 0.17 |
| Breast | 8  | 62622640  | 62634995  | ENST00000379449.6 | ASPH       | 0.38 | 0.21 | 0.17 |
| Breast | 2  | 12841318  | 12863362  | ENST00000405331.3 | TRIB2      | 0.35 | 0.19 | 0.17 |
| Breast | 5  | 67510759  | 67574308  | ENST00000520675.1 | PIK3R1     | 0.27 | 0.10 | 0.16 |
| Breast | 19 | 16177568  | 16192210  | ENST00000588483.1 | TPM4       | 0.43 | 0.26 | 0.16 |
| Breast | 10 | 112252889 | 112273435 | ENST00000468749.1 | DUSP5      | 0.37 | 0.21 | 0.16 |
| Breast | 19 | 47598365  | 47618174  | ENST00000594526.1 | SAE1       | 0.46 | 0.30 | 0.16 |
| Breast | 20 | 17537085  | 17560729  | ENST00000449141.2 | DSTN       | 0.27 | 0.12 | 0.16 |
| Breast | 17 | 38627225  | 38717027  | ENST00000254051.6 | TNS4       | 0.21 | 0.05 | 0.16 |
| Breast | 11 | 65678179  | 65686589  | ENST00000530188.1 | C11orf68   | 0.30 | 0.14 | 0.16 |
| Breast | 17 | 80831491  | 80848486  | ENST00000572984.1 | TBCD       | 0.21 | 0.05 | 0.16 |
| Breast | 1  | 27320120  | 27340181  | ENST00000289166.5 | FAM46B     | 0.33 | 0.18 | 0.16 |
| Breast | 1  | 19247868  | 19283180  | ENST00000416166.1 | IFFO2      | 0.29 | 0.14 | 0.15 |
| Breast | 10 | 121410843 | 121447500 | ENST00000450186.1 | BAG3       | 0.21 | 0.06 | 0.15 |
| Breast | 7  | 42257859  | 42278946  | ENST00000428534.1 | GLI3       | 0.33 | 0.17 | 0.15 |
| Breast | 7  | 869464    | 876882    | ENST00000469755.1 | SUN1       | 0.22 | 0.07 | 0.15 |
| Breast | 15 | 50644604  | 50649357  | ENST00000560896.1 | GABPB1     | 0.96 | 0.80 | 0.15 |
| Breast | 17 | 7736868   | 7749068   | ENST00000570632.1 | KDM6B      | 0.92 | 0.77 | 0.15 |
| Breast | 18 | 46449301  | 46483832  | ENST00000586093.1 | SMAD7      | 0.47 | 0.32 | 0.15 |
| Breast | 17 | 75274996  | 75288850  | ENST00000587237.1 | 9-Sep      | 0.30 | 0.15 | 0.15 |
| Breast | 12 | 109225745 | 109251401 | ENST00000548522.1 | SSH1       | 0.24 | 0.09 | 0.15 |
| Breast | 12 | 52608969  | 52643707  | ENST00000544024.1 | KRT86      | 0.21 | 0.06 | 0.15 |
| Breast | 2  | 114081148 | 114089147 | ENST00000429538.3 | PAX8       | 0.30 | 0.16 | 0.15 |
| Breast | 9  | 124030410 | 124052489 | ENST00000545652.1 | GSN        | 0.40 | 0.26 | 0.15 |
| Breast | 17 | 75387047  | 75426957  | ENST00000586521.1 | 9-Sep      | 0.22 | 0.08 | 0.15 |
| Breast | 11 | 61732568  | 61749363  | ENST00000601917.1 | AP003733.1 | 0.38 | 0.24 | 0.14 |
| Breast | 7  | 41734099  | 41745805  | ENST00000442711.1 | INHBA      | 0.40 | 0.26 | 0.14 |
| Breast | 6  | 138172161 | 138196002 | ENST00000433680.1 | TNFAIP3    | 0.29 | 0.14 | 0.14 |
| Breast | 1  | 16274460  | 16281222  | ENST00000494020.1 | ZBTB17     | 0.21 | 0.07 | 0.14 |
| Breast | 19 | 41220087  | 41229010  | ENST00000263370.2 | ITPKC      | 0.69 | 0.55 | 0.14 |
| Breast | 15 | 68548590  | 68582156  | ENST00000566739.1 | FEM1B      | 0.25 | 0.12 | 0.13 |
| Breast | 2  | 106009478 | 106028025 | ENST00000447958.1 | FHL2       | 0.21 | 0.08 | 0.13 |
| Breast | 10 | 74051120  | 74097380  | ENST00000473051.1 | DNAJB12    | 0.27 | 0.14 | 0.13 |
| Breast | 19 | 42771661  | 42788152  | ENST00000575839.1 | CIC        | 0.57 | 0.44 | 0.13 |
| Breast | 6  | 10398835  | 10421638  | ENST00000486038.1 | TFAP2A     | 0.81 | 0.68 | 0.13 |
| Breast | 11 | 57045039  | 57094324  | ENST00000527207.1 | TNKS1BP1   | 0.23 | 0.09 | 0.13 |
| Breast | 3  | 71104592  | 71120542  | ENST00000497553.1 | FOXP1      | 0.41 | 0.28 | 0.13 |
| Breast | 20 | 19954385  | 20001261  | ENST00000481837.1 | NAA20      | 0.22 | 0.09 | 0.13 |
| Breast | 19 | 13948994  | 13959464  | ENST00000591727.1 | NANOS3     | 0.68 | 0.56 | 0.13 |
| Breast | 16 | 23152633  | 23161835  | ENST00000219689.7 | USP31      | 0.37 | 0.24 | 0.12 |
| Breast | 1  | 16156416  | 16179578  | ENST00000375759.3 | SPEN       | 0.49 | 0.37 | 0.12 |
| Breast | 4  | 169752417 | 169771288 | ENST00000507735.1 | PALLD      | 0.28 | 0.16 | 0.12 |
| Breast | 3  | 9436165   | 9466747   | ENST00000468208.1 | SETD5      | 0.30 | 0.18 | 0.12 |
| Breast | 1  | 207221596 | 207227576 | ENST00000367079.2 | PFKFB2     | 0.61 | 0.48 | 0.12 |
| Breast | 2  | 43444985  | 43456496  | ENST00000282388.3 | ZFP36L2    | 1.00 | 0.88 | 0.12 |
| Breast | 1  | 33207559  | 33241755  | ENST00000373480.1 | KIAA1522   | 0.22 | 0.10 | 0.12 |

|        |    |           |           |                   |            |      |      |      |
|--------|----|-----------|-----------|-------------------|------------|------|------|------|
| Breast | 4  | 95366945  | 95386196  | ENST00000511767.1 | PDLIM5     | 0.24 | 0.11 | 0.12 |
| Breast | 7  | 36426266  | 36435508  | ENST00000418118.1 | ANLN       | 0.36 | 0.23 | 0.12 |
| Breast | 5  | 124075983 | 124085579 | ENST00000512940.1 | ZNF608     | 0.90 | 0.78 | 0.12 |
| Breast | 1  | 155097310 | 155110100 | ENST00000484027.1 | SLC50A1    | 0.63 | 0.51 | 0.12 |
| Breast | 1  | 201404474 | 201474025 | ENST00000532460.1 | CSRP1      | 0.22 | 0.10 | 0.12 |
| Breast | 18 | 3446318   | 3460082   | ENST00000472042.1 | TGIF1      | 0.68 | 0.56 | 0.12 |
| Breast | 6  | 136605683 | 136612552 | ENST00000528229.1 | BCLAF1     | 0.54 | 0.42 | 0.12 |
| Breast | 1  | 6637843   | 6670728   | ENST00000496707.1 | KLHL21     | 0.28 | 0.17 | 0.12 |
| Breast | 11 | 65185034  | 65198304  | ENST00000531151.1 | FRMD8      | 1.00 | 0.88 | 0.12 |
| Breast | 5  | 140887653 | 140909039 | ENST00000468119.1 | DIAPH1     | 0.23 | 0.11 | 0.12 |
| Breast | 10 | 106080462 | 106112294 | ENST00000458723.1 | ITPRIP     | 0.31 | 0.19 | 0.12 |
| Breast | 4  | 103736345 | 103751180 | ENST00000503282.1 | UBE2D3     | 0.48 | 0.36 | 0.11 |
| Breast | 5  | 2739262   | 2759651   | ENST00000502957.1 | IRX2       | 0.92 | 0.80 | 0.11 |
| Breast | 15 | 75930589  | 75963120  | ENST00000569152.1 | SNX33      | 0.27 | 0.16 | 0.11 |
| Breast | 2  | 87744763  | 87759323  | ENST00000359481.4 | PLGLB2     | 0.21 | 0.09 | 0.11 |
| Breast | 10 | 82213990  | 82238676  | ENST00000372156.1 | TSPAN14    | 0.25 | 0.14 | 0.11 |
| Breast | 1  | 144981791 | 144985538 | ENST00000596396.1 | AL590452.1 | 0.28 | 0.17 | 0.11 |
| Breast | 12 | 109082915 | 109097018 | ENST00000547170.1 | CORO1C     | 0.31 | 0.21 | 0.11 |
| Breast | 10 | 73723394  | 73770620  | ENST00000373115.4 | CHST3      | 0.25 | 0.15 | 0.11 |
| Breast | 12 | 125388867 | 125425378 | ENST00000542416.1 | UBC        | 0.39 | 0.28 | 0.11 |
| Breast | 1  | 27183345  | 27192842  | ENST00000339276.4 | SFN        | 0.33 | 0.22 | 0.11 |
| Breast | 17 | 17723596  | 17746027  | ENST00000435530.2 | SREBF1     | 0.36 | 0.25 | 0.11 |
| Breast | 14 | 69241271  | 69268143  | ENST00000408913.2 | ZFP36L1    | 0.42 | 0.32 | 0.10 |
| Breast | 10 | 33226394  | 33252825  | ENST00000439974.3 | ITGB1      | 0.30 | 0.19 | 0.10 |
| Breast | 16 | 15735275  | 15740014  | ENST00000396353.2 | NDE1       | 0.64 | 0.54 | 0.10 |
| Breast | 17 | 17578482  | 17616584  | ENST00000471135.2 | RAI1       | 0.26 | 0.15 | 0.10 |
| Breast | 11 | 12694725  | 12726400  | ENST00000334310.6 | TEAD1      | 0.27 | 0.17 | 0.10 |
| Breast | 1  | 8062975   | 8088860   | ENST00000487559.1 | ERRF1      | 0.25 | 0.14 | 0.10 |
| Breast | 9  | 130280649 | 130347137 | ENST00000373314.3 | FAM129B    | 0.20 | 0.10 | 0.10 |
| Breast | 10 | 74002370  | 74038384  | ENST00000471240.1 | DDIT4      | 0.27 | 0.17 | 0.10 |
| Breast | 17 | 27134005  | 27140821  | ENST00000582059.1 | FAM222B    | 0.45 | 0.35 | 0.10 |
| Breast | 7  | 115849775 | 115868787 | ENST00000485009.1 | TES        | 0.21 | 0.11 | 0.10 |
| Breast | 2  | 46523740  | 46563334  | ENST00000475822.1 | EPAS1      | 0.23 | 0.13 | 0.10 |
| CD19   | 19 | 13204800  | 13217457  | ENST00000590120.1 | LYL1       | 0.94 | 0.34 | 0.60 |
| CD19   | 14 | 106313303 | 106330974 | ENST00000482999.1 | KIAA0125   | 0.51 | 0.00 | 0.51 |
| CD19   | 17 | 73289760  | 73295202  | ENST00000580273.1 | SLC25A19   | 0.51 | 0.00 | 0.51 |
| CD19   | 8  | 134509931 | 134514822 | ENST00000520020.1 | ST3GAL1    | 0.60 | 0.12 | 0.48 |
| CD19   | 12 | 57869667  | 57876031  | ENST00000552249.1 | ARHGAP9    | 0.56 | 0.14 | 0.42 |
| CD19   | 2  | 232255961 | 232260646 | ENST00000287590.5 | B3GNT7     | 0.54 | 0.13 | 0.41 |
| CD19   | 22 | 50627294  | 50632183  | ENST00000395829.1 | TRABD      | 0.69 | 0.28 | 0.41 |
| CD19   | 2  | 182168501 | 182179942 | ENST00000476089.1 | ITGA4      | 0.40 | 0.00 | 0.40 |
| CD19   | 6  | 31547188  | 31556914  | ENST00000464044.1 | LST1       | 0.57 | 0.18 | 0.40 |
| CD19   | 17 | 43299369  | 43312992  | ENST00000591434.1 | FMNL1      | 0.55 | 0.16 | 0.39 |
| CD19   | 1  | 26609716  | 26620076  | ENST00000319041.6 | SH3BGRL3   | 0.40 | 0.03 | 0.37 |
| CD19   | 17 | 47814002  | 47827686  | ENST00000515240.1 | FAM117A    | 0.35 | 0.00 | 0.35 |
| CD19   | 19 | 16693911  | 16706114  | ENST00000598492.1 | MED26      | 0.52 | 0.17 | 0.35 |
| CD19   | 7  | 50344148  | 50370755  | ENST00000426121.1 | IKZF1      | 0.41 | 0.07 | 0.35 |
| CD19   | 4  | 26883290  | 26890121  | ENST00000478049.1 | STIM2      | 0.34 | 0.00 | 0.34 |
| CD19   | 2  | 197013308 | 197048452 | ENST00000449152.1 | STK17B     | 0.42 | 0.07 | 0.34 |
| CD19   | 21 | 45660565  | 45668530  | ENST00000400377.3 | ICOSLG     | 0.72 | 0.38 | 0.34 |
| CD19   | 14 | 64700800  | 64703816  | ENST00000554928.1 | SYNE2      | 0.42 | 0.08 | 0.34 |
| CD19   | 9  | 71251305  | 71262079  | ENST00000541509.1 | PIP5K1B    | 0.33 | 0.00 | 0.33 |
| CD19   | 9  | 134593692 | 134613095 | ENST00000372189.3 | RAPGEF1    | 0.40 | 0.08 | 0.32 |
| CD19   | 11 | 9708104   | 9716296   | ENST00000524817.1 | SWAP70     | 0.39 | 0.07 | 0.32 |
| CD19   | 20 | 42307887  | 42312191  | ENST00000217026.4 | MYBL2      | 0.32 | 0.00 | 0.32 |
| CD19   | 15 | 81576278  | 81610588  | ENST00000559953.1 | IL16       | 0.33 | 0.01 | 0.32 |
| CD19   | 11 | 58340596  | 58348101  | ENST00000389919.4 | ZFP91-CNTF | 0.83 | 0.52 | 0.31 |
| CD19   | 17 | 56394652  | 56423683  | ENST00000583624.1 | BZRAP1     | 0.46 | 0.16 | 0.31 |
| CD19   | 8  | 56751994  | 56758932  | ENST00000519728.1 | LYN        | 0.54 | 0.24 | 0.30 |
| CD19   | 1  | 111401311 | 111424334 | ENST00000476408.1 | CD53       | 0.29 | 0.00 | 0.29 |
| CD19   | 14 | 61937696  | 61947119  | ENST00000536400.1 | PRKCH      | 0.33 | 0.04 | 0.29 |
| CD19   | 1  | 167584400 | 167603373 | ENST00000537350.1 | RCSD1      | 0.37 | 0.08 | 0.29 |
| CD19   | 2  | 31436778  | 31445756  | ENST00000403897.3 | CAPN14     | 0.28 | 0.00 | 0.28 |
| CD19   | 5  | 133262873 | 133277639 | ENST00000509913.1 | C5orf15    | 0.28 | 0.00 | 0.28 |
| CD19   | 7  | 86840957  | 86850205  | ENST00000455575.1 | TMEM243    | 0.59 | 0.31 | 0.28 |
| CD19   | 19 | 35694706  | 35707859  | ENST00000324675.3 | FAM187B    | 0.34 | 0.06 | 0.28 |
| CD19   | 6  | 13258837  | 13278907  | ENST00000481706.1 | PHACTR1    | 0.29 | 0.01 | 0.28 |



|      |    |           |           |                   |             |      |      |      |
|------|----|-----------|-----------|-------------------|-------------|------|------|------|
| CD19 | 18 | 77219226  | 77227908  | ENST00000591089.1 | NFATC1      | 0.29 | 0.01 | 0.28 |
| CD19 | 19 | 7400756   | 7417433   | ENST00000576789.1 | CTB-133G6.1 | 0.32 | 0.05 | 0.27 |
| CD19 | 11 | 117872360 | 117887673 | ENST00000525467.1 | IL10RA      | 0.28 | 0.01 | 0.27 |
| CD19 | 9  | 112727706 | 112739040 | ENST00000434623.2 | AKAP2       | 0.27 | 0.00 | 0.27 |
| CD19 | 14 | 105524940 | 105537562 | ENST00000546679.1 | GPR132      | 0.32 | 0.05 | 0.27 |
| CD19 | 8  | 101505352 | 101515105 | ENST00000519316.1 | ANKRD46     | 0.31 | 0.04 | 0.27 |
| CD19 | 19 | 49827519  | 49845306  | ENST00000600121.1 | CD37        | 0.38 | 0.12 | 0.27 |
| CD19 | 1  | 53096945  | 53108122  | ENST00000424164.1 | FAM159A     | 0.35 | 0.08 | 0.27 |
| CD19 | 14 | 106282350 | 106287664 | ENST00000482999.1 | KIAA0125    | 0.27 | 0.00 | 0.27 |
| CD19 | 15 | 75066062  | 75093388  | ENST00000569321.1 | CSK         | 0.51 | 0.25 | 0.27 |
| CD19 | 1  | 31201550  | 31236569  | ENST00000476492.1 | LAPTM5      | 0.30 | 0.04 | 0.26 |
| CD19 | 10 | 11184898  | 11223017  | ENST00000537122.1 | CELF2       | 0.32 | 0.06 | 0.26 |
| CD19 | 6  | 32402294  | 32411438  | ENST00000374982.5 | HLA-DRA     | 0.36 | 0.10 | 0.26 |
| CD19 | 15 | 86229664  | 86252170  | ENST00000560482.1 | AKAP13      | 0.31 | 0.05 | 0.26 |
| CD19 | 8  | 11340662  | 11367244  | ENST00000529894.1 | BLK         | 0.26 | 0.00 | 0.26 |
| CD19 | 11 | 35097683  | 35106244  | ENST00000598940.1 | AL356215.1  | 0.31 | 0.05 | 0.26 |
| CD19 | 4  | 40174339  | 40216705  | ENST00000503978.1 | RHOH        | 0.30 | 0.04 | 0.26 |
| CD19 | 19 | 42374270  | 42392833  | ENST00000337665.4 | ARHGEF1     | 0.44 | 0.19 | 0.25 |
| CD19 | 8  | 56790857  | 56809092  | ENST00000520220.1 | LYN         | 0.35 | 0.10 | 0.25 |
| CD19 | 11 | 61120450  | 61130574  | ENST00000423772.2 | TMEM138     | 0.45 | 0.20 | 0.25 |
| CD19 | 10 | 49874683  | 49897623  | ENST00000360890.2 | WDFY4       | 0.25 | 0.00 | 0.25 |
| CD19 | 22 | 24821855  | 24835079  | ENST00000439591.1 | ADORA2A     | 0.26 | 0.02 | 0.25 |
| CD19 | 16 | 29346657  | 29372711  | ENST00000356328.3 | SNX29P2     | 0.24 | 0.00 | 0.24 |
| CD19 | 17 | 3807403   | 3821299   | ENST00000571637.1 | P2RX1       | 0.34 | 0.10 | 0.24 |
| CD19 | 19 | 35807029  | 35840479  | ENST00000593704.1 | CD22        | 0.26 | 0.02 | 0.24 |
| CD19 | 9  | 134127597 | 134154499 | ENST00000464831.1 | FAM78A      | 0.35 | 0.11 | 0.24 |
| CD19 | 6  | 149785200 | 149817360 | ENST00000462655.1 | ZC3H12D     | 0.28 | 0.04 | 0.24 |
| CD19 | 11 | 128582503 | 128610944 | ENST00000534087.1 | FLI1        | 0.28 | 0.04 | 0.24 |
| CD19 | 1  | 21618391  | 21627146  | ENST00000527991.1 | ECE1        | 0.26 | 0.02 | 0.24 |
| CD19 | 11 | 72850513  | 72872020  | ENST00000422375.1 | FCSD2       | 0.41 | 0.17 | 0.24 |
| CD19 | 16 | 81803418  | 81877366  | ENST00000569523.1 | PLCG2       | 0.26 | 0.02 | 0.24 |
| CD19 | 2  | 233923908 | 233972771 | ENST00000467393.1 | INPP5D      | 0.29 | 0.05 | 0.24 |
| CD19 | 16 | 85921635  | 85951991  | ENST00000569607.1 | IRF8        | 0.29 | 0.05 | 0.24 |
| CD19 | 17 | 74476430  | 74497452  | ENST00000590288.1 | RHBDF2      | 0.36 | 0.13 | 0.23 |
| CD19 | 20 | 4789416   | 4805261   | ENST00000379400.3 | RASSF2      | 0.41 | 0.18 | 0.23 |
| CD19 | 22 | 47159882  | 47174367  | ENST00000406733.1 | TBC1D22A    | 0.27 | 0.03 | 0.23 |
| CD19 | 5  | 88114708  | 88142027  | ENST00000509373.1 | MEF2C       | 0.24 | 0.01 | 0.23 |
| CD19 | 20 | 46038978  | 46050263  | ENST00000262975.4 | ZMYND8      | 0.24 | 0.01 | 0.23 |
| CD19 | 19 | 2610475   | 2632474   | ENST00000587867.1 | GNG7        | 0.31 | 0.09 | 0.22 |
| CD19 | 22 | 42304034  | 42337858  | ENST00000472374.2 | CENPM       | 0.44 | 0.22 | 0.22 |
| CD19 | 6  | 32807846  | 32814107  | ENST00000414474.1 | PSMB9       | 0.52 | 0.30 | 0.22 |
| CD19 | 5  | 1479672   | 1506754   | ENST00000507282.1 | LPCAT1      | 0.23 | 0.01 | 0.22 |
| CD19 | 6  | 150937029 | 150965213 | ENST00000367326.1 | PLEKHG1     | 0.25 | 0.03 | 0.22 |
| CD19 | 18 | 2956157   | 2983444   | ENST00000581568.1 | LPIN2       | 0.23 | 0.02 | 0.22 |
| CD19 | 6  | 159459555 | 159485569 | ENST00000338313.5 | TAGAP       | 0.27 | 0.05 | 0.22 |
| CD19 | 7  | 35764330  | 35771796  | ENST00000396081.1 | HERPUD2     | 0.22 | 0.00 | 0.22 |
| CD19 | 7  | 35764330  | 35771796  | ENST00000311350.3 | HERPUD2     | 0.22 | 0.00 | 0.22 |
| CD19 | 11 | 118739056 | 118768630 | ENST00000292174.4 | CXCR5       | 0.25 | 0.04 | 0.22 |
| CD19 | 7  | 150100445 | 150107156 | ENST00000474836.1 | ZNF775      | 0.56 | 0.35 | 0.21 |
| CD19 | 19 | 10712789  | 10716244  | ENST00000407327.4 | SLC44A2     | 0.80 | 0.58 | 0.21 |
| CD19 | 16 | 21367569  | 21393569  | ENST00000542817.1 | NPIPL3      | 0.21 | 0.00 | 0.21 |
| CD19 | 4  | 56812204  | 56816635  | ENST00000257287.4 | CEP135      | 0.73 | 0.52 | 0.21 |
| CD19 | 17 | 38004143  | 38027814  | ENST00000377940.3 | ZPBP2       | 0.26 | 0.05 | 0.21 |
| CD19 | 20 | 43204843  | 43247481  | ENST00000349959.3 | PKIG        | 0.24 | 0.03 | 0.21 |
| CD19 | 14 | 89768030  | 89775675  | ENST00000555658.1 | FOXN3       | 0.30 | 0.09 | 0.21 |
| CD19 | 14 | 69147805  | 69153516  | ENST00000555997.1 | ZFP36L1     | 0.23 | 0.03 | 0.21 |
| CD19 | 3  | 5047573   | 5059145   | ENST00000460806.1 | BHLHE40     | 0.23 | 0.02 | 0.20 |
| CD19 | 11 | 58967706  | 58992697  | ENST00000361050.3 | MPEG1       | 0.22 | 0.02 | 0.20 |
| CD19 | 16 | 10959821  | 11016093  | ENST00000572665.1 | CIITA       | 0.28 | 0.07 | 0.20 |
| CD19 | 1  | 150122093 | 150138999 | ENST00000485470.1 | PLEKHO1     | 0.34 | 0.13 | 0.20 |
| CD19 | 20 | 55964442  | 55977216  | ENST00000371219.2 | RBM38       | 0.53 | 0.33 | 0.20 |
| CD19 | 3  | 196350844 | 196371448 | ENST00000426755.1 | PIGX        | 0.34 | 0.14 | 0.20 |
| CD19 | 17 | 45276453  | 45285339  | ENST00000571981.1 | MYL4        | 0.23 | 0.04 | 0.20 |
| CD19 | 15 | 57571264  | 57599710  | ENST00000560948.1 | TCF12       | 0.24 | 0.04 | 0.19 |
| CD19 | 22 | 18476769  | 18494405  | ENST00000424046.1 | MICAL3      | 0.32 | 0.12 | 0.19 |
| CD19 | 1  | 206730430 | 206756416 | ENST00000304534.8 | RASSF5      | 0.25 | 0.05 | 0.19 |
| CD19 | 15 | 74666045  | 74697205  | ENST00000268053.6 | CYP11A1     | 0.31 | 0.12 | 0.19 |

|      |    |           |           |                   |             |      |      |      |
|------|----|-----------|-----------|-------------------|-------------|------|------|------|
| CD19 | 11 | 122930787 | 122942297 | ENST00000531063.1 | HSPA8       | 0.53 | 0.34 | 0.19 |
| CD19 | 16 | 85965145  | 85983944  | ENST00000569607.1 | IRF8        | 0.21 | 0.02 | 0.19 |
| CD19 | 9  | 126959034 | 126982108 | ENST00000373603.1 | NEK6        | 0.20 | 0.02 | 0.19 |
| CD19 | 9  | 126959034 | 126982108 | ENST00000540326.1 | NEK6        | 0.20 | 0.02 | 0.19 |
| CD19 | 18 | 60804706  | 60831957  | ENST00000590515.1 | BCL2        | 0.25 | 0.07 | 0.19 |
| CD19 | 17 | 61992715  | 62032882  | ENST00000584310.1 | SCN4A       | 0.22 | 0.04 | 0.19 |
| CD19 | 2  | 136871650 | 136898787 | ENST00000466288.1 | CXCR4       | 0.33 | 0.14 | 0.18 |
| CD19 | 1  | 27984903  | 27990153  | ENST00000339145.4 | IFI6        | 0.51 | 0.32 | 0.18 |
| CD19 | 22 | 37613897  | 37642449  | ENST00000401529.3 | RAC2        | 0.28 | 0.09 | 0.18 |
| CD19 | 1  | 207078366 | 207106998 | ENST00000487208.1 | PIGR        | 0.23 | 0.05 | 0.18 |
| CD19 | 10 | 11703130  | 11728646  | ENST00000379237.1 | USP6NL      | 0.23 | 0.05 | 0.18 |
| CD19 | 6  | 32904722  | 32916498  | ENST00000416244.2 | HLA-DMB     | 0.27 | 0.09 | 0.18 |
| CD19 | 14 | 64966362  | 64978672  | ENST00000555321.1 | ZBTB1       | 0.55 | 0.37 | 0.18 |
| CD19 | 2  | 71290385  | 71301563  | ENST00000524537.1 | NAGK        | 0.39 | 0.21 | 0.18 |
| CD19 | 3  | 58318904  | 58343543  | ENST00000491164.1 | PXK         | 0.25 | 0.07 | 0.18 |
| CD19 | 5  | 163334703 | 163344988 | ENST00000521838.1 | MAT2B       | 0.20 | 0.03 | 0.18 |
| CD19 | 6  | 41671523  | 41703442  | ENST00000433032.1 | TFEB        | 0.33 | 0.15 | 0.18 |
| CD19 | 3  | 10232905  | 10242463  | ENST00000256458.4 | IRAK2       | 0.33 | 0.16 | 0.18 |
| CD19 | 1  | 172348783 | 172369092 | ENST00000465374.1 | PIGC        | 0.21 | 0.03 | 0.17 |
| CD19 | 2  | 128144112 | 128148979 | ENST00000409179.2 | MAP3K2      | 0.62 | 0.45 | 0.17 |
| CD19 | 21 | 44817042  | 44836022  | ENST00000478426.1 | SIK1        | 0.22 | 0.05 | 0.17 |
| CD19 | 12 | 48196588  | 48213374  | ENST00000445237.2 | HDAC7       | 0.40 | 0.23 | 0.17 |
| CD19 | 11 | 67034303  | 67056724  | ENST00000447274.2 | ANKRD13D    | 0.40 | 0.23 | 0.17 |
| CD19 | 22 | 22510876  | 22526241  | ENST00000403807.3 | VPREB1      | 0.23 | 0.07 | 0.17 |
| CD19 | 9  | 139115225 | 139137596 | ENST00000455222.1 | QSOX2       | 0.22 | 0.05 | 0.17 |
| CD19 | 7  | 138778458 | 138805019 | ENST00000471652.1 | ZC3HAV1     | 0.29 | 0.12 | 0.17 |
| CD19 | 14 | 106023918 | 106072429 | ENST00000431372.1 | TMEM121     | 0.21 | 0.04 | 0.17 |
| CD19 | 21 | 45556978  | 45601335  | ENST00000598764.1 | AP001055.1  | 0.28 | 0.12 | 0.17 |
| CD19 | 3  | 122291690 | 122308644 | ENST00000483793.1 | PARP15      | 0.20 | 0.04 | 0.16 |
| CD19 | 18 | 74764261  | 74781577  | ENST00000580473.1 | MBP         | 0.29 | 0.13 | 0.16 |
| CD19 | 16 | 84618823  | 84644362  | ENST00000561707.1 | COTL1       | 0.20 | 0.04 | 0.16 |
| CD19 | 9  | 35616119  | 35651731  | ENST00000474403.1 | SIT1        | 0.23 | 0.07 | 0.16 |
| CD19 | 1  | 38937882  | 38948718  | ENST00000474456.1 | RRAGC       | 0.22 | 0.06 | 0.16 |
| CD19 | 6  | 143160621 | 143189869 | ENST00000367604.1 | HIVEP2      | 0.22 | 0.06 | 0.16 |
| CD19 | 6  | 143160621 | 143189869 | ENST0000012134.2  | HIVEP2      | 0.22 | 0.06 | 0.16 |
| CD19 | 6  | 143160621 | 143189869 | ENST00000474532.1 | HIVEP2      | 0.22 | 0.06 | 0.16 |
| CD19 | 3  | 107841403 | 107856868 | ENST00000468021.1 | IFT57       | 0.22 | 0.06 | 0.16 |
| CD19 | 6  | 167362856 | 167374276 | ENST00000496851.2 | RNASET2     | 0.36 | 0.20 | 0.16 |
| CD19 | 9  | 130665468 | 130681316 | ENST00000479747.1 | ST6GALNAC4  | 0.33 | 0.18 | 0.16 |
| CD19 | 19 | 50917413  | 50938549  | ENST00000357701.5 | MYBPC2      | 0.42 | 0.26 | 0.16 |
| CD19 | 13 | 46942847  | 46975976  | ENST00000480935.1 | KIAA0226L   | 0.24 | 0.08 | 0.16 |
| CD19 | 2  | 238580170 | 238610065 | ENST00000473815.1 | LRRFIP1     | 0.35 | 0.19 | 0.16 |
| CD19 | 12 | 92527263  | 92581890  | ENST00000552315.1 | BTG1        | 0.30 | 0.14 | 0.15 |
| CD19 | 3  | 13034134  | 13065411  | ENST00000473088.1 | IQSEC1      | 0.30 | 0.15 | 0.15 |
| CD19 | 11 | 73076425  | 73101853  | ENST00000393580.2 | RELT        | 0.21 | 0.06 | 0.15 |
| CD19 | 11 | 82763568  | 82785588  | ENST00000533276.1 | RAB30       | 0.31 | 0.16 | 0.15 |
| CD19 | 2  | 46761453  | 46803094  | ENST00000473428.1 | RHOQ        | 0.24 | 0.09 | 0.15 |
| CD19 | 14 | 23018284  | 23039986  | ENST00000557595.1 | AE000662.92 | 0.25 | 0.10 | 0.15 |
| CD19 | 12 | 7044970   | 7072648   | ENST00000537533.1 | PTPN6       | 0.36 | 0.21 | 0.15 |
| CD19 | 4  | 82389749  | 82394691  | ENST00000507538.1 | RASGEF1B    | 0.74 | 0.59 | 0.14 |
| CD19 | 12 | 113486672 | 113531373 | ENST00000553140.1 | DTX1        | 0.23 | 0.09 | 0.14 |
| CD19 | 4  | 185452534 | 185460044 | ENST00000393593.3 | IRF2        | 0.39 | 0.25 | 0.14 |
| CD19 | 12 | 9788063   | 9838708   | ENST00000544322.1 | CLEC2D      | 0.20 | 0.06 | 0.14 |
| CD19 | 4  | 40289700  | 40319643  | ENST00000310169.2 | CHRNA9      | 0.21 | 0.06 | 0.14 |
| CD19 | 17 | 38473833  | 38487686  | ENST00000582914.1 | RARA        | 0.58 | 0.44 | 0.14 |
| CD19 | 7  | 142490667 | 142511468 | ENST00000463701.1 | PRSS1       | 0.26 | 0.12 | 0.14 |
| CD19 | 1  | 111734737 | 111768995 | ENST00000445067.2 | CHI3L2      | 0.20 | 0.06 | 0.14 |
| CD19 | 6  | 149077573 | 149093955 | ENST00000367463.4 | UST         | 0.21 | 0.07 | 0.14 |
| CD19 | 2  | 231729691 | 231744201 | ENST00000492029.1 | ITM2C       | 0.33 | 0.19 | 0.14 |
| CD19 | 6  | 144654443 | 144673365 | ENST00000421035.1 | UTRN        | 0.20 | 0.07 | 0.14 |
| CD19 | 16 | 15728212  | 15738278  | ENST00000396353.2 | NDE1        | 0.42 | 0.28 | 0.14 |
| CD19 | 10 | 90144149  | 90152479  | ENST00000437752.1 | RNLS        | 0.29 | 0.15 | 0.14 |
| CD19 | 1  | 40838755  | 40871047  | ENST00000539317.1 | SMAP2       | 0.22 | 0.08 | 0.14 |
| CD19 | 17 | 27064086  | 27073896  | ENST00000584944.1 | TRAF4       | 0.48 | 0.35 | 0.13 |
| CD19 | 19 | 2040263   | 2096653   | ENST00000395307.2 | IZUMO4      | 0.32 | 0.19 | 0.13 |
| CD19 | 9  | 3524176   | 3529109   | ENST00000449190.1 | RFX3        | 0.90 | 0.77 | 0.13 |
| CD19 | 17 | 29814146  | 29838313  | ENST00000578694.1 | RAB11FIP4   | 0.24 | 0.11 | 0.13 |

|       |    |           |           |                   |             |      |      |      |
|-------|----|-----------|-----------|-------------------|-------------|------|------|------|
| CD19  | 13 | 41534432  | 41594336  | ENST00000239882.3 | ELF1        | 0.21 | 0.08 | 0.13 |
| CD19  | 19 | 18278723  | 18292546  | ENST00000600463.1 | IFI30       | 0.23 | 0.10 | 0.13 |
| CD19  | 6  | 106957303 | 106996547 | ENST00000487681.1 | AIM1        | 0.26 | 0.13 | 0.13 |
| CD19  | 2  | 196511447 | 196525260 | ENST00000418005.1 | SLC39A10    | 0.39 | 0.26 | 0.13 |
| CD19  | 17 | 75396031  | 75469717  | ENST00000593189.1 | 9-Sep       | 0.28 | 0.15 | 0.12 |
| CD19  | 14 | 50327610  | 50337580  | ENST00000298310.5 | NEMF        | 0.50 | 0.38 | 0.12 |
| CD19  | 12 | 46657445  | 46665336  | ENST00000546519.1 | SLC38A1     | 0.57 | 0.45 | 0.12 |
| CD19  | 16 | 11758829  | 11785379  | ENST00000575349.1 | TXNDC11     | 0.22 | 0.10 | 0.12 |
| CD19  | 1  | 154914194 | 154929302 | ENST00000490230.1 | PBXIP1      | 0.29 | 0.16 | 0.12 |
| CD19  | 1  | 2477758   | 2482788   | ENST00000426449.1 | TNFRSF14    | 0.72 | 0.59 | 0.12 |
| CD19  | 2  | 54783925  | 54824402  | ENST00000333896.5 | SPTBN1      | 0.27 | 0.15 | 0.12 |
| CD19  | 11 | 9621558   | 9642085   | ENST00000527848.1 | WEE1        | 0.21 | 0.09 | 0.12 |
| CD19  | 15 | 45001549  | 45023195  | ENST00000561237.1 | TRIM69      | 0.36 | 0.24 | 0.12 |
| CD19  | 20 | 44736001  | 44751095  | ENST00000461171.1 | CD40        | 0.21 | 0.09 | 0.12 |
| CD19  | 12 | 110431794 | 110453837 | ENST00000261739.4 | ANKRD13A    | 0.28 | 0.16 | 0.12 |
| CD19  | 2  | 202106787 | 202128005 | ENST00000429881.1 | CASP8       | 0.21 | 0.10 | 0.11 |
| CD19  | 8  | 29937591  | 29951059  | ENST00000521083.1 | TMEM66      | 0.29 | 0.18 | 0.11 |
| CD19  | 22 | 31680149  | 31688920  | ENST00000443175.1 | PIK3IP1     | 0.44 | 0.33 | 0.11 |
| CD19  | 9  | 123686905 | 123707487 | ENST00000540010.1 | TRAF1       | 0.30 | 0.19 | 0.11 |
| CD19  | 10 | 112618797 | 112633729 | ENST00000444997.1 | PDCD4       | 0.35 | 0.25 | 0.11 |
| CD19  | 16 | 28921620  | 28948628  | ENST00000567368.1 | CD19        | 0.20 | 0.10 | 0.11 |
| CD19  | 14 | 105116134 | 105145145 | ENST00000330634.7 | INF2        | 0.23 | 0.12 | 0.11 |
| CD19  | 5  | 122109910 | 122117182 | ENST00000514949.1 | SNX2        | 0.41 | 0.31 | 0.11 |
| CD19  | 18 | 2634081   | 2658907   | ENST00000261598.8 | SMCHD1      | 0.25 | 0.15 | 0.10 |
| CD19  | 19 | 39887963  | 39904206  | ENST00000438123.1 | PLEKHG2     | 0.70 | 0.60 | 0.10 |
| CD19  | 1  | 66795175  | 66818506  | ENST00000526197.1 | PDE4B       | 0.28 | 0.18 | 0.10 |
| Colon | 20 | 43968274  | 43977802  | ENST00000537976.1 | SDC4        | 0.77 | 0.29 | 0.48 |
| Colon | 1  | 2505891   | 2510796   | ENST00000493183.1 | FAM213B     | 0.61 | 0.15 | 0.46 |
| Colon | 17 | 57904024  | 57931778  | ENST00000587470.1 | VMP1        | 0.49 | 0.14 | 0.35 |
| Colon | 6  | 74224863  | 74234116  | ENST00000455918.1 | EEF1A1      | 0.90 | 0.58 | 0.32 |
| Colon | 7  | 27210777  | 27221249  | ENST00000396344.4 | HOXA10      | 0.76 | 0.45 | 0.30 |
| Colon | 17 | 37780840  | 37791262  | ENST00000580029.1 | PPP1R1B     | 0.49 | 0.19 | 0.30 |
| Colon | 10 | 3846234   | 3854755   | ENST00000542957.1 | KLF6        | 0.42 | 0.13 | 0.29 |
| Colon | 1  | 19966426  | 19978402  | ENST00000427894.1 | NBL1        | 0.54 | 0.25 | 0.28 |
| Colon | 15 | 75072089  | 75083506  | ENST00000567571.1 | CSK         | 0.80 | 0.52 | 0.28 |
| Colon | 5  | 79542438  | 79554102  | ENST00000513907.1 | SERINC5     | 0.51 | 0.26 | 0.25 |
| Colon | 17 | 76164003  | 76173458  | ENST00000592456.1 | SYNGR2      | 0.53 | 0.29 | 0.24 |
| Colon | 21 | 42931018  | 42955389  | ENST00000454499.1 | TMPRSS2     | 0.24 | 0.01 | 0.23 |
| Colon | 1  | 207111967 | 207121081 | ENST00000491503.1 | PIGR        | 0.23 | 0.00 | 0.23 |
| Colon | 13 | 28526778  | 28556061  | ENST00000548877.1 | CDX2        | 0.94 | 0.72 | 0.23 |
| Colon | 15 | 86121044  | 86133400  | ENST00000560340.1 | AKAP13      | 0.40 | 0.18 | 0.22 |
| Colon | 18 | 3446352   | 3459783   | ENST00000472042.1 | TGIF1       | 0.77 | 0.55 | 0.22 |
| Colon | 14 | 50465553  | 50471375  | ENST00000529902.1 | C14orf182   | 0.66 | 0.45 | 0.22 |
| Colon | 16 | 29830344  | 29838029  | ENST00000570234.1 | MVP         | 0.48 | 0.28 | 0.19 |
| Colon | 3  | 193848397 | 193860794 | ENST00000476918.1 | HES1        | 0.80 | 0.61 | 0.19 |
| Colon | 12 | 7051408   | 7057319   | ENST00000538318.1 | PTPN6       | 0.59 | 0.40 | 0.18 |
| Colon | 1  | 159888888 | 159896553 | ENST00000397334.2 | TAGLN2      | 0.63 | 0.45 | 0.18 |
| Colon | 17 | 7161661   | 7168259   | ENST00000573745.1 | CLDN7       | 0.63 | 0.45 | 0.18 |
| Colon | 6  | 31700974  | 31708664  | ENST00000493662.2 | MSH5-SAPCD1 | 0.87 | 0.70 | 0.18 |
| Colon | 20 | 52195018  | 52241000  | ENST00000540425.1 | ZNF217      | 0.41 | 0.24 | 0.17 |
| Colon | 3  | 49056900  | 49060957  | ENST00000480392.1 | NDUFAF3     | 0.84 | 0.67 | 0.17 |
| Colon | 12 | 56472347  | 56482109  | ENST00000546748.1 | ERBB3       | 0.44 | 0.27 | 0.17 |
| Colon | 11 | 130013608 | 130061419 | ENST00000530376.1 | ST14        | 0.22 | 0.05 | 0.16 |
| Colon | 2  | 200306225 | 200342782 | ENST00000463386.1 | SATB2       | 0.56 | 0.40 | 0.16 |
| Colon | 16 | 2028149   | 2036628   | ENST00000567719.1 | GFER        | 0.59 | 0.43 | 0.16 |
| Colon | 4  | 38662929  | 38689928  | ENST00000436901.1 | AC021860.1  | 0.45 | 0.29 | 0.16 |
| Colon | 8  | 126438172 | 126449618 | ENST00000519576.1 | TRIB1       | 0.52 | 0.36 | 0.16 |
| Colon | 1  | 1092807   | 1104591   | ENST00000506177.1 | TTL10       | 0.35 | 0.19 | 0.16 |
| Colon | 19 | 49463688  | 49472130  | ENST00000331825.6 | FTL         | 0.54 | 0.39 | 0.15 |
| Colon | 1  | 37936771  | 37953471  | ENST00000471012.1 | ZC3H12A     | 0.49 | 0.34 | 0.15 |
| Colon | 7  | 150052314 | 150083105 | ENST00000486297.1 | ZNF775      | 0.36 | 0.21 | 0.15 |
| Colon | 2  | 173291273 | 173330716 | ENST00000409080.1 | ITGA6       | 0.25 | 0.10 | 0.15 |
| Colon | 19 | 13948788  | 13956320  | ENST00000591727.1 | NANOS3      | 0.69 | 0.55 | 0.15 |
| Colon | 11 | 307666    | 312937    | ENST00000399815.2 | IFITM2      | 0.70 | 0.55 | 0.14 |
| Colon | 11 | 118659296 | 118664159 | ENST00000533239.1 | DDX6        | 1.00 | 0.86 | 0.14 |
| Colon | 10 | 134259441 | 134282106 | ENST00000392630.3 | C10orf91    | 0.26 | 0.12 | 0.14 |
| Colon | 10 | 134259441 | 134282106 | ENST00000321248.2 | C10orf91    | 0.26 | 0.12 | 0.14 |

|       |    |           |           |                   |            |      |      |      |
|-------|----|-----------|-----------|-------------------|------------|------|------|------|
| Colon | 4  | 102266379 | 102270939 | ENST00000529296.1 | AP001816.1 | 0.94 | 0.80 | 0.14 |
| Colon | 1  | 150531037 | 150543263 | ENST00000369035.2 | C1orf138   | 0.51 | 0.37 | 0.14 |
| Colon | 17 | 27275334  | 27280852  | ENST00000577182.1 | PIPOX      | 1.00 | 0.86 | 0.14 |
| Colon | 1  | 149819766 | 149826428 | ENST00000403683.1 | HIST2H3A   | 0.28 | 0.14 | 0.14 |
| Colon | 11 | 71748625  | 71754435  | ENST00000535947.1 | NUMA1      | 0.81 | 0.67 | 0.13 |
| Colon | 5  | 96268784  | 96273156  | ENST00000231368.5 | LNPEP      | 0.95 | 0.81 | 0.13 |
| Colon | 19 | 1256417   | 1263739   | ENST00000589161.1 | CIRBP      | 0.65 | 0.52 | 0.13 |
| Colon | 11 | 64654606  | 64662582  | ENST00000457202.1 | EHD1       | 0.23 | 0.09 | 0.13 |
| Colon | 2  | 201980044 | 201998492 | ENST00000460961.1 | CFLAR      | 0.57 | 0.44 | 0.13 |
| Colon | 3  | 9436663   | 9444883   | ENST00000406341.1 | SETD5      | 0.78 | 0.65 | 0.13 |
| Colon | 17 | 4845115   | 4854686   | ENST00000519300.1 | ENO3       | 0.72 | 0.58 | 0.13 |
| Colon | 1  | 153503987 | 153511480 | ENST00000462951.2 | S100A6     | 0.39 | 0.26 | 0.13 |
| Colon | 10 | 90638872  | 90664402  | ENST00000371924.1 | STAMBPL1   | 0.20 | 0.07 | 0.13 |
| Colon | 9  | 140187219 | 140215940 | ENST00000356628.2 | NRARP      | 0.53 | 0.40 | 0.13 |
| Colon | 5  | 180668526 | 180674519 | ENST00000514318.1 | GNB2L1     | 0.82 | 0.70 | 0.13 |
| Colon | 2  | 174828021 | 174831622 | ENST00000490182.1 | SP3        | 1.00 | 0.88 | 0.12 |
| Colon | 1  | 1675407   | 1679081   | ENST00000246421.4 | SLC35E2    | 0.74 | 0.62 | 0.12 |
| Colon | 2  | 220109452 | 220119946 | ENST00000392088.2 | TUBA4A     | 0.53 | 0.40 | 0.12 |
| Colon | 12 | 53762866  | 53777584  | ENST00000548560.1 | SP1        | 0.41 | 0.29 | 0.12 |
| Colon | 7  | 1486269   | 1507327   | ENST00000297508.7 | MICALL2    | 0.35 | 0.23 | 0.12 |
| Colon | 19 | 1852750   | 1865843   | ENST00000592313.1 | KLF16      | 0.63 | 0.51 | 0.12 |
| Colon | 6  | 33538390  | 33559780  | ENST00000374458.1 | GGNBP1     | 0.27 | 0.16 | 0.12 |
| Colon | 4  | 40185249  | 40208107  | ENST00000503978.1 | RHOH       | 0.25 | 0.13 | 0.12 |
| Colon | 7  | 104643451 | 104656449 | ENST00000474203.1 | MLL5       | 0.62 | 0.51 | 0.12 |
| Colon | 8  | 103816742 | 103826153 | ENST00000518697.1 | AZIN1      | 0.54 | 0.43 | 0.12 |
| Colon | 2  | 151323963 | 151344439 | ENST00000454202.1 | RND3       | 0.28 | 0.17 | 0.11 |
| Colon | 1  | 169069278 | 169085972 | ENST00000367813.3 | ATP1B1     | 0.45 | 0.34 | 0.11 |
| Colon | 17 | 38213719  | 38232994  | ENST00000577486.1 | THRA       | 0.55 | 0.44 | 0.11 |
| Colon | 12 | 6559071   | 6563067   | ENST00000543567.1 | TAPBPL     | 0.75 | 0.64 | 0.11 |
| Colon | 17 | 4033794   | 4049258   | ENST00000573984.1 | CYB5D2     | 0.27 | 0.16 | 0.11 |
| Colon | 5  | 179244886 | 179250297 | ENST00000360718.5 | SQSTM1     | 0.68 | 0.57 | 0.11 |
| Colon | 7  | 100608082 | 100627662 | ENST00000536621.1 | MUC12      | 0.30 | 0.20 | 0.11 |
| Colon | 17 | 7459695   | 7466311   | ENST00000429205.2 | SENP3      | 0.74 | 0.63 | 0.11 |
| Colon | 7  | 27202748  | 27210249  | ENST00000489695.1 | HOXA9      | 0.95 | 0.85 | 0.10 |
| Colon | 6  | 32934747  | 32951807  | ENST00000482838.1 | BRD2       | 0.61 | 0.51 | 0.10 |
| Colon | 3  | 50373024  | 50380264  | ENST00000490675.1 | ZMYND10    | 0.49 | 0.39 | 0.10 |
| Lung  | 20 | 23060957  | 23069729  | ENST00000246006.4 | CD93       | 0.23 | 0.01 | 0.21 |
| Lung  | 17 | 7378645   | 7384073   | ENST00000380599.4 | ZBTB4      | 0.65 | 0.45 | 0.20 |
| Lung  | 12 | 6441703   | 6453465   | ENST00000538363.1 | TNFRSF1A   | 0.61 | 0.45 | 0.16 |
| Lung  | 2  | 66659175  | 66674430  | ENST00000475239.1 | MEIS1      | 0.78 | 0.63 | 0.16 |
| Lung  | 22 | 46464333  | 46478321  | ENST00000443490.1 | MIRLET7    | 0.85 | 0.71 | 0.15 |
| Lung  | 20 | 22536539  | 22565230  | ENST00000319993.4 | FOXA2      | 0.69 | 0.54 | 0.15 |
| Lung  | 1  | 145434374 | 145443479 | ENST00000486597.1 | TXNIP      | 0.71 | 0.57 | 0.15 |
| Lung  | 12 | 92526891  | 92540701  | ENST00000552315.1 | BTG1       | 0.71 | 0.57 | 0.14 |
| Lung  | 14 | 105938037 | 105944737 | ENST00000548309.1 | CRIP2      | 0.80 | 0.66 | 0.14 |
| Lung  | 5  | 43033834  | 43045550  | ENST00000314890.3 | ANXA2R     | 0.57 | 0.43 | 0.14 |
| Lung  | 4  | 174427206 | 174460857 | ENST00000505300.1 | HAND2      | 0.74 | 0.60 | 0.14 |
| Lung  | 9  | 35726029  | 35733751  | ENST00000486056.1 | CREB3      | 0.65 | 0.53 | 0.12 |
| Lung  | 1  | 154939647 | 154948901 | ENST00000473344.1 | CKS1B      | 0.61 | 0.48 | 0.12 |
| Lung  | 19 | 45244285  | 45262369  | ENST00000473473.1 | BCL3       | 0.46 | 0.34 | 0.12 |
| Lung  | 12 | 119613625 | 119628282 | ENST00000542496.1 | HSPB8      | 0.22 | 0.10 | 0.12 |
| Lung  | 1  | 2160113   | 2167961   | ENST00000508416.1 | SKI        | 0.66 | 0.55 | 0.12 |
| Lung  | 16 | 56638742  | 56646907  | ENST00000567300.1 | MT2A       | 0.50 | 0.39 | 0.12 |
| Lung  | 11 | 67803279  | 67809641  | ENST00000533947.1 | TCIRG1     | 0.45 | 0.34 | 0.11 |
| Lung  | 19 | 13948720  | 13956318  | ENST00000591727.1 | NANOS3     | 0.66 | 0.55 | 0.11 |
| Lung  | 11 | 305282    | 312843    | ENST00000399815.2 | IFITM2     | 0.50 | 0.40 | 0.10 |

**Supplementary Table 3:** Validation of tissue-specific DNA methylation at super-enhancers in normal tissue types.

| Tissue | Super-Enhancer |           |           | Transcript ID     | Gene     | HMR coverage (%) |        |       | DNA Methylation 450K |            |      | Significance<br>-log10(p-value) | Validated |
|--------|----------------|-----------|-----------|-------------------|----------|------------------|--------|-------|----------------------|------------|------|---------------------------------|-----------|
|        | Chr.           | Start     | End       |                   |          | Tissue           | Others | Diff. | AVR Tissue           | AVR Others |      |                                 |           |
| Brain  | 10             | 126400866 | 126432679 | ENST00000392754.3 | FAM53B   | 0.40             | 0.19   | 0.21  | 0.27                 | 0.32       | 8.42 | TRUE                            |           |
| Brain  | 11             | 67173218  | 67188540  | ENST00000531388.1 | CARNS1   | 0.45             | 0.21   | 0.24  | 0.19                 | 0.25       | 5.85 | TRUE                            |           |
| Brain  | 1              | 205195003 | 205257756 | ENST00000481950.1 | TMCC2    | 0.23             | 0.09   | 0.14  | 0.23                 | 0.27       | 4.99 | TRUE                            |           |
| Brain  | 17             | 72226877  | 72248627  | ENST00000526858.1 | TTYH2    | 0.23             | 0.03   | 0.20  | 0.28                 | 0.45       | 4.55 | TRUE                            |           |
| Brain  | 1              | 205626881 | 205650899 | ENST00000367145.3 | SLC45A3  | 0.29             | 0.14   | 0.15  | 0.06                 | 0.07       | 4.38 | TRUE                            |           |
| Brain  | 22             | 37940770  | 37968154  | ENST00000434728.1 | CDC42EP1 | 0.50             | 0.25   | 0.25  | 0.20                 | 0.26       | 4.33 | TRUE                            |           |
| Brain  | 7              | 124359038 | 124407316 | ENST00000303921.2 | GPR37    | 0.51             | 0.05   | 0.46  | 0.23                 | 0.30       | 4.25 | TRUE                            |           |
| Brain  | 1              | 221879013 | 221917508 | ENST00000477026.1 | DUSP10   | 0.32             | 0.09   | 0.23  | 0.16                 | 0.19       | 3.98 | TRUE                            |           |
| Brain  | 17             | 27071068  | 27095625  | ENST00000584059.1 | FAM222B  | 0.29             | 0.14   | 0.15  | 0.12                 | 0.16       | 3.98 | TRUE                            |           |
| Brain  | 7              | 28724048  | 28800494  | ENST00000468813.1 | CREB5    | 0.27             | 0.04   | 0.23  | 0.26                 | 0.35       | 3.87 | TRUE                            |           |
| Brain  | 14             | 65146034  | 65196928  | ENST00000556801.1 | PLEKHG3  | 0.31             | 0.11   | 0.20  | 0.20                 | 0.26       | 3.83 | TRUE                            |           |
| Brain  | 19             | 51033029  | 51070726  | ENST00000599957.1 | LRRC4B   | 0.30             | 0.17   | 0.14  | 0.32                 | 0.43       | 3.80 | TRUE                            |           |
| Brain  | 6              | 41649397  | 41702285  | ENST00000433032.1 | TFEB     | 0.30             | 0.10   | 0.20  | 0.30                 | 0.38       | 3.78 | TRUE                            |           |
| Brain  | 21             | 48018786  | 48058971  | ENST00000440086.1 | PRMT2    | 0.35             | 0.09   | 0.26  | 0.27                 | 0.32       | 3.64 | TRUE                            |           |
| Brain  | 1              | 149967151 | 149985599 | ENST00000417191.1 | OTUD7B   | 0.27             | 0.11   | 0.16  | 0.15                 | 0.17       | 3.55 | TRUE                            |           |
| Brain  | 11             | 73357627  | 73375282  | ENST00000544282.1 | PLEKHB1  | 0.20             | 0.08   | 0.13  | 0.18                 | 0.21       | 3.31 | TRUE                            |           |
| Brain  | 10             | 81137824  | 81212605  | ENST00000372333.3 | ZCCHC24  | 0.43             | 0.09   | 0.33  | 0.23                 | 0.27       | 3.26 | TRUE                            |           |
| Brain  | 12             | 49579740  | 49630368  | ENST00000552125.1 | TUBA1C   | 0.23             | 0.09   | 0.13  | 0.18                 | 0.24       | 3.22 | TRUE                            |           |
| Brain  | 1              | 109889550 | 109945440 | ENST00000471996.1 | SORT1    | 0.26             | 0.05   | 0.20  | 0.23                 | 0.30       | 3.11 | TRUE                            |           |
| Brain  | 6              | 30844750  | 30864481  | ENST00000514434.1 | DDR1     | 0.45             | 0.18   | 0.27  | 0.28                 | 0.37       | 3.10 | TRUE                            |           |
| Brain  | 11             | 118463235 | 118534958 | ENST00000528823.1 | PHLDB1   | 0.23             | 0.10   | 0.13  | 0.26                 | 0.31       | 3.09 | TRUE                            |           |
| Brain  | 17             | 57405868  | 57485233  | ENST00000582813.1 | YPEL2    | 0.20             | 0.06   | 0.14  | 0.15                 | 0.19       | 3.03 | TRUE                            |           |
| Brain  | 1              | 214156400 | 214205391 | ENST00000261454.4 | PROX1    | 0.32             | 0.13   | 0.19  | 0.22                 | 0.25       | 3.01 | TRUE                            |           |
| Brain  | 4              | 77099124  | 77138142  | ENST00000512895.1 | FAM47E   | 0.30             | 0.14   | 0.16  | 0.16                 | 0.19       | 3.01 | TRUE                            |           |
| Brain  | 1              | 202090299 | 202115217 | ENST00000272217.2 | ARL8A    | 0.39             | 0.17   | 0.23  | 0.25                 | 0.35       | 2.95 | TRUE                            |           |
| Brain  | 7              | 141373362 | 141403139 | ENST00000482493.1 | KIAA1147 | 0.22             | 0.06   | 0.16  | 0.25                 | 0.29       | 2.93 | TRUE                            |           |
| Brain  | 13             | 67782754  | 67806323  | ENST00000377861.3 | PCDH9    | 0.59             | 0.20   | 0.39  | 0.18                 | 0.23       | 2.91 | TRUE                            |           |
| Brain  | 2              | 232526039 | 232554844 | ENST00000466801.1 | PTMA     | 0.34             | 0.23   | 0.12  | 0.18                 | 0.20       | 2.87 | TRUE                            |           |
| Brain  | 17             | 76857381  | 76931557  | ENST00000262768.7 | TIMP2    | 0.23             | 0.09   | 0.14  | 0.33                 | 0.39       | 2.79 | TRUE                            |           |
| Brain  | 1              | 160019557 | 160042341 | ENST00000368089.3 | KCNJ10   | 0.23             | 0.07   | 0.16  | 0.19                 | 0.22       | 2.72 | TRUE                            |           |
| Brain  | 5              | 173313778 | 173354104 | ENST00000519467.1 | CPEB4    | 0.34             | 0.08   | 0.25  | 0.17                 | 0.23       | 2.70 | TRUE                            |           |
| Brain  | 3              | 156845617 | 156856684 | ENST00000467849.1 | CCNL1    | 0.30             | 0.15   | 0.15  | 0.23                 | 0.30       | 2.70 | TRUE                            |           |
| Brain  | 16             | 57277838  | 57336233  | ENST00000569059.1 | PLLP     | 0.30             | 0.10   | 0.20  | 0.13                 | 0.16       | 2.70 | TRUE                            |           |
| Brain  | 10             | 111967550 | 111992938 | ENST00000369612.1 | MXI1     | 0.40             | 0.29   | 0.11  | 0.15                 | 0.16       | 2.68 | TRUE                            |           |
| Brain  | 2              | 164566271 | 164594418 | ENST00000482917.1 | FIGN     | 0.35             | 0.11   | 0.25  | 0.20                 | 0.25       | 2.63 | TRUE                            |           |

|       |    |           |           |                   |          |      |      |      |      |      |      |      |
|-------|----|-----------|-----------|-------------------|----------|------|------|------|------|------|------|------|
| Brain | 15 | 45655307  | 45688573  | ENST00000558118.1 | GATM     | 0.24 | 0.05 | 0.19 | 0.20 | 0.28 | 2.62 | TRUE |
| Brain | 1  | 204796255 | 204866707 | ENST00000514644.1 | NFASC    | 0.21 | 0.03 | 0.18 | 0.30 | 0.37 | 2.60 | TRUE |
| Brain | 2  | 127806748 | 127912517 | ENST00000409400.1 | BIN1     | 0.36 | 0.06 | 0.30 | 0.21 | 0.26 | 2.53 | TRUE |
| Brain | 6  | 134488737 | 134505092 | ENST00000525700.1 | SGK1     | 0.60 | 0.27 | 0.34 | 0.24 | 0.29 | 2.51 | TRUE |
| Brain | 5  | 139012918 | 139146609 | ENST00000505812.1 | CXXC5    | 0.36 | 0.22 | 0.14 | 0.23 | 0.26 | 2.43 | TRUE |
| Brain | 9  | 140081775 | 140094696 | ENST00000477345.1 | TPRN     | 0.56 | 0.20 | 0.35 | 0.25 | 0.29 | 2.39 | TRUE |
| Brain | 14 | 77765872  | 77789479  | ENST00000555093.1 | GSTZ1    | 0.39 | 0.12 | 0.27 | 0.19 | 0.22 | 2.37 | TRUE |
| Brain | 5  | 646895    | 697805    | ENST00000360578.5 | TPPP     | 0.23 | 0.12 | 0.12 | 0.27 | 0.32 | 2.34 | TRUE |
| Brain | 3  | 134072004 | 134096230 | ENST00000502491.1 | AMOTL2   | 0.44 | 0.19 | 0.25 | 0.19 | 0.22 | 2.33 | TRUE |
| Brain | 17 | 40114067  | 40162277  | ENST00000591153.1 | DNAJC7   | 0.27 | 0.07 | 0.20 | 0.33 | 0.38 | 2.32 | TRUE |
| Brain | 9  | 130697475 | 130743184 | ENST00000494606.1 | FAM102A  | 0.61 | 0.17 | 0.44 | 0.27 | 0.32 | 2.32 | TRUE |
| Brain | 1  | 230932874 | 231004412 | ENST00000366663.5 | C1orf198 | 0.21 | 0.03 | 0.18 | 0.29 | 0.34 | 2.31 | TRUE |
| Brain | 10 | 72971329  | 73044360  | ENST00000373192.4 | UNC5B    | 0.21 | 0.09 | 0.12 | 0.20 | 0.23 | 2.30 | TRUE |
| Brain | 1  | 160047565 | 160068437 | ENST00000460351.1 | IGSF8    | 0.35 | 0.14 | 0.21 | 0.29 | 0.31 | 2.25 | TRUE |
| Brain | 12 | 26265040  | 26280746  | ENST00000534829.1 | SSPN     | 0.64 | 0.47 | 0.17 | 0.14 | 0.16 | 2.12 | TRUE |
| Brain | 1  | 109816196 | 109827024 | ENST00000471740.1 | PSRC1    | 0.36 | 0.17 | 0.19 | 0.16 | 0.18 | 2.11 | TRUE |
| Brain | 19 | 13093539  | 13211813  | ENST00000588680.1 | NFIX     | 0.47 | 0.21 | 0.26 | 0.29 | 0.34 | 2.10 | TRUE |
| Brain | 14 | 90845063  | 90876551  | ENST00000556721.1 | CALM1    | 0.35 | 0.20 | 0.15 | 0.09 | 0.10 | 2.08 | TRUE |
| Brain | 3  | 11024732  | 11080079  | ENST00000495636.1 | SLC6A1   | 0.23 | 0.06 | 0.17 | 0.20 | 0.24 | 2.07 | TRUE |
| Brain | 1  | 32792421  | 32824727  | ENST00000574315.1 | TSSK3    | 0.27 | 0.14 | 0.12 | 0.18 | 0.19 | 2.07 | TRUE |
| Brain | 17 | 17638844  | 17657613  | ENST00000395774.1 | RAI1     | 0.30 | 0.16 | 0.14 | 0.25 | 0.29 | 2.06 | TRUE |
| Brain | 19 | 17858364  | 17882158  | ENST00000600393.1 | FCHO1    | 0.22 | 0.11 | 0.11 | 0.21 | 0.24 | 2.01 | TRUE |
| Brain | 7  | 45111554  | 45132881  | ENST00000490531.2 | NACAD    | 0.22 | 0.07 | 0.15 | 0.27 | 0.31 | 1.99 | TRUE |
| Brain | 2  | 220142124 | 220157631 | ENST00000460801.1 | PTPRN    | 0.43 | 0.16 | 0.27 | 0.31 | 0.35 | 1.96 | TRUE |
| Brain | 11 | 134254603 | 134298147 | ENST00000531510.1 | B3GAT1   | 0.26 | 0.11 | 0.15 | 0.22 | 0.26 | 1.94 | TRUE |
| Brain | 6  | 163815822 | 163882069 | ENST00000537883.1 | QKI      | 0.79 | 0.13 | 0.66 | 0.17 | 0.18 | 1.89 | TRUE |
| Brain | 19 | 50985631  | 51019282  | ENST00000598657.1 | ASPDH    | 0.28 | 0.11 | 0.17 | 0.28 | 0.34 | 1.86 | TRUE |
| Brain | 1  | 155828272 | 155864174 | ENST00000539162.1 | SYT11    | 0.21 | 0.06 | 0.15 | 0.14 | 0.17 | 1.85 | TRUE |
| Brain | 1  | 205461954 | 205494873 | ENST00000505932.1 | CDK18    | 0.26 | 0.06 | 0.20 | 0.23 | 0.26 | 1.84 | TRUE |
| Brain | 4  | 154142334 | 154219000 | ENST00000433687.1 | TRIM2    | 0.38 | 0.05 | 0.32 | 0.31 | 0.33 | 1.80 | TRUE |
| Brain | 7  | 30174536  | 30225450  | ENST00000455738.1 | C7orf41  | 0.23 | 0.06 | 0.18 | 0.30 | 0.34 | 1.80 | TRUE |
| Brain | 9  | 124022263 | 124092639 | ENST00000477553.1 | GSN      | 0.26 | 0.12 | 0.15 | 0.30 | 0.34 | 1.77 | TRUE |
| Brain | 5  | 36599886  | 36615091  | ENST00000509272.1 | SLC1A3   | 0.50 | 0.11 | 0.38 | 0.17 | 0.20 | 1.76 | TRUE |
| Brain | 1  | 61541625  | 61624014  | ENST00000496712.1 | NFIA     | 0.24 | 0.11 | 0.13 | 0.12 | 0.14 | 1.76 | TRUE |
| Brain | 17 | 56589712  | 56620235  | ENST00000582976.1 | SEPT4    | 0.36 | 0.19 | 0.17 | 0.21 | 0.23 | 1.72 | TRUE |
| Brain | 10 | 124216441 | 124276238 | ENST00000420892.1 | HTRA1    | 0.27 | 0.07 | 0.20 | 0.30 | 0.34 | 1.64 | TRUE |
| Brain | 8  | 26427962  | 26519962  | ENST00000474808.1 | DPYSL2   | 0.45 | 0.10 | 0.35 | 0.33 | 0.37 | 1.59 | TRUE |
| Brain | 9  | 14299740  | 14327190  | ENST00000493697.1 | NFIB     | 0.57 | 0.42 | 0.15 | 0.23 | 0.27 | 1.56 | TRUE |
| Brain | 6  | 52225169  | 52265846  | ENST00000360726.3 | PAQR8    | 0.21 | 0.07 | 0.14 | 0.12 | 0.15 | 1.50 | TRUE |

|       |    |           |           |                   |            |      |      |      |      |      |      |       |
|-------|----|-----------|-----------|-------------------|------------|------|------|------|------|------|------|-------|
| Brain | 2  | 145129528 | 145283099 | ENST00000475115.1 | ZEB2       | 0.39 | 0.08 | 0.30 | 0.21 | 0.24 | 1.50 | TRUE  |
| Brain | 1  | 90285126  | 90311060  | ENST00000527156.1 | LRRRC8D    | 0.33 | 0.14 | 0.18 | 0.05 | 0.06 | 1.48 | TRUE  |
| Brain | 12 | 123317747 | 123395518 | ENST00000371248.3 | VPS37B     | 0.30 | 0.13 | 0.17 | 0.31 | 0.33 | 1.47 | TRUE  |
| Brain | 1  | 160161970 | 160191690 | ENST00000481831.1 | DCAF8      | 0.25 | 0.09 | 0.17 | 0.16 | 0.19 | 1.44 | TRUE  |
| Brain | 14 | 50976072  | 51001976  | ENST00000441560.2 | ATL1       | 0.36 | 0.11 | 0.26 | 0.14 | 0.15 | 1.34 | TRUE  |
| Brain | 5  | 132105879 | 132116081 | ENST00000492490.1 | SEPT8      | 0.43 | 0.21 | 0.22 | 0.21 | 0.25 | 1.31 | TRUE  |
| Brain | 22 | 46445235  | 46456789  | ENST00000381051.2 | MIRLET7    | 0.63 | 0.47 | 0.16 | 0.19 | 0.23 | 1.30 | TRUE  |
| Brain | 20 | 31025912  | 31074699  | ENST00000326071.4 | C20orf112  | 0.35 | 0.16 | 0.19 | 0.11 | 0.13 | 1.27 | FALSE |
| Brain | 1  | 160068777 | 160077945 | ENST00000448417.1 | IGSF8      | 0.44 | 0.14 | 0.30 | 0.26 | 0.28 | 1.25 | FALSE |
| Brain | 17 | 42161429  | 42202224  | ENST00000587135.1 | HDAC5      | 0.23 | 0.10 | 0.14 | 0.17 | 0.18 | 1.24 | FALSE |
| Brain | 6  | 15245470  | 15269892  | ENST00000397311.3 | JARID2     | 0.36 | 0.25 | 0.11 | 0.08 | 0.08 | 1.24 | FALSE |
| Brain | 2  | 95678307  | 95745847  | ENST00000349807.3 | MAL        | 0.27 | 0.08 | 0.19 | 0.21 | 0.24 | 1.24 | FALSE |
| Brain | 5  | 126625320 | 126648566 | ENST00000274473.6 | MEGF10     | 0.30 | 0.06 | 0.24 | 0.27 | 0.32 | 1.16 | FALSE |
| Brain | 12 | 6639174   | 6665533   | ENST00000396830.2 | IFFO1      | 0.40 | 0.29 | 0.11 | 0.18 | 0.20 | 1.15 | FALSE |
| Brain | 20 | 45922895  | 45992027  | ENST00000441977.1 | ZMYND8     | 0.24 | 0.13 | 0.11 | 0.16 | 0.19 | 1.14 | FALSE |
| Brain | 10 | 102752997 | 102775915 | ENST00000454422.1 | LZTS2      | 0.44 | 0.32 | 0.13 | 0.20 | 0.22 | 1.09 | FALSE |
| Brain | 7  | 32078425  | 32118455  | ENST00000464881.1 | PDE1C      | 0.23 | 0.06 | 0.17 | 0.22 | 0.26 | 1.07 | FALSE |
| Brain | 1  | 110071934 | 110092553 | ENST00000369851.4 | GNAI3      | 0.31 | 0.18 | 0.13 | 0.02 | 0.03 | 1.05 | FALSE |
| Brain | 10 | 64127809  | 64167185  | ENST00000421210.1 | ZNF365     | 0.23 | 0.03 | 0.20 | 0.24 | 0.26 | 1.04 | FALSE |
| Brain | 17 | 48914258  | 48946511  | ENST00000509385.1 | TOB1       | 0.28 | 0.17 | 0.11 | 0.17 | 0.18 | 1.01 | FALSE |
| Brain | 15 | 43800300  | 43824728  | ENST00000300231.5 | MAP1A      | 0.28 | 0.16 | 0.12 | 0.17 | 0.18 | 1.01 | FALSE |
| Brain | 1  | 33789227  | 33859751  | ENST00000468406.1 | PHC2       | 0.25 | 0.11 | 0.14 | 0.30 | 0.33 | 0.95 | FALSE |
| Brain | 6  | 69337682  | 69367340  | ENST00000370598.1 | BAI3       | 0.33 | 0.16 | 0.17 | 0.09 | 0.09 | 0.83 | FALSE |
| Brain | 20 | 35445944  | 35496093  | ENST00000357779.3 | SOGA1      | 0.30 | 0.11 | 0.20 | 0.30 | 0.31 | 0.82 | FALSE |
| Brain | 9  | 133698900 | 133750533 | ENST00000318560.5 | ABL1       | 0.29 | 0.08 | 0.21 | 0.33 | 0.36 | 0.81 | FALSE |
| Brain | 15 | 64974641  | 64996542  | ENST00000559665.2 | OAZ2       | 0.36 | 0.11 | 0.24 | 0.16 | 0.17 | 0.80 | FALSE |
| Brain | 2  | 9768796   | 9795405   | ENST00000460093.1 | YWHAQ      | 0.21 | 0.09 | 0.11 | 0.14 | 0.15 | 0.75 | FALSE |
| Brain | 3  | 181403893 | 181455295 | ENST00000325404.1 | SOX2       | 0.84 | 0.56 | 0.28 | 0.22 | 0.22 | 0.72 | FALSE |
| Brain | 11 | 111845328 | 111865086 | ENST00000530645.1 | DIXDC1     | 0.33 | 0.09 | 0.24 | 0.32 | 0.34 | 0.70 | FALSE |
| Brain | 6  | 128798636 | 128843173 | ENST00000368202.4 | PTPRK      | 0.20 | 0.09 | 0.11 | 0.08 | 0.08 | 0.67 | FALSE |
| Brain | 13 | 97862565  | 97936838  | ENST00000445661.2 | MBNL2      | 0.24 | 0.09 | 0.15 | 0.21 | 0.23 | 0.67 | FALSE |
| Brain | 17 | 38258962  | 38270871  | ENST00000246672.3 | NR1D1      | 0.42 | 0.31 | 0.11 | 0.15 | 0.16 | 0.64 | FALSE |
| Brain | 22 | 46457577  | 46466999  | ENST00000396008.2 | MIRLET7    | 0.94 | 0.50 | 0.44 | 0.31 | 0.35 | 0.64 | FALSE |
| Brain | 5  | 124064380 | 124097267 | ENST00000512940.1 | ZNF608     | 0.41 | 0.24 | 0.17 | 0.31 | 0.37 | 0.62 | FALSE |
| Brain | 12 | 1752842   | 1776949   | ENST00000545747.1 | WNT5B      | 0.24 | 0.13 | 0.11 | 0.29 | 0.31 | 0.37 | FALSE |
| Brain | 2  | 193010308 | 193063844 | ENST00000409056.3 | TMEFF2     | 0.21 | 0.06 | 0.15 | 0.22 | 0.23 | 0.37 | FALSE |
| Brain | 3  | 69130585  | 69168856  | ENST00000485444.1 | ARL6IP5    | 0.22 | 0.12 | 0.10 | 0.18 | 0.19 | 0.35 | FALSE |
| Brain | 5  | 115856316 | 115912087 | ENST00000512156.1 | SEMA6A     | 0.23 | 0.08 | 0.14 | 0.16 | 0.17 | 0.33 | FALSE |
| Brain | 12 | 48167031  | 48182319  | ENST00000599515.1 | AC004466.1 | 0.40 | 0.10 | 0.31 | 0.04 | 0.04 | 0.32 | FALSE |

|        |    |           |           |                   |            |      |      |      |      |      |       |       |
|--------|----|-----------|-----------|-------------------|------------|------|------|------|------|------|-------|-------|
| Brain  | 10 | 73574974  | 73621362  | ENST00000394934.1 | PSAP       | 0.21 | 0.05 | 0.15 | 0.19 | 0.20 | 0.29  | FALSE |
| Brain  | 21 | 43639119  | 43683392  | ENST00000340588.4 | ABCG1      | 0.22 | 0.11 | 0.11 | 0.19 | 0.20 | 0.28  | FALSE |
| Brain  | 9  | 135976307 | 136024639 | ENST00000372062.3 | RALGDS     | 0.33 | 0.16 | 0.17 | 0.23 | 0.24 | 0.27  | FALSE |
| Brain  | 19 | 54921528  | 54950915  | ENST00000467939.1 | TTYH1      | 0.38 | 0.18 | 0.20 | 0.20 | 0.22 | 0.24  | FALSE |
| Brain  | 9  | 8840393   | 8880342   | ENST00000481079.1 | PTPRD      | 0.24 | 0.08 | 0.16 | 0.22 | 0.23 | 0.22  | FALSE |
| Brain  | 4  | 134065738 | 134085565 | ENST00000511112.1 | PCDH10     | 0.73 | 0.42 | 0.30 | 0.16 | 0.15 | 0.16  | FALSE |
| Brain  | 15 | 37371561  | 37406086  | ENST00000559129.1 | MEIS2      | 0.46 | 0.33 | 0.12 | 0.24 | 0.22 | 0.15  | FALSE |
| Brain  | 3  | 170135527 | 170167574 | ENST00000488989.1 | CLDN11     | 0.34 | 0.07 | 0.27 | 0.32 | 0.30 | 0.13  | FALSE |
| Brain  | 7  | 86272604  | 86301105  | ENST00000421579.1 | GRM3       | 0.22 | 0.09 | 0.13 | 0.12 | 0.11 | 0.12  | FALSE |
| Brain  | 17 | 38216903  | 38234316  | ENST00000577486.1 | THRA       | 0.63 | 0.48 | 0.15 | 0.21 | 0.21 | 0.09  | FALSE |
| Brain  | 4  | 96452170  | 96474433  | ENST00000504962.1 | UNC5C      | 0.48 | 0.15 | 0.33 | 0.12 | 0.11 | 0.03  | FALSE |
| Brain  | 19 | 30713867  | 30786928  | ENST00000591488.1 | ZNF536     | 0.21 | 0.11 | 0.10 | 0.15 | 0.14 | 0.02  | FALSE |
| Brain  | 10 | 24989499  | 25014855  | ENST00000463892.1 | ARHGAP21   | 0.33 | 0.22 | 0.12 | 0.15 | 0.16 | -0.02 | FALSE |
| Brain  | 14 | 51524492  | 51564122  | ENST00000360392.4 | TRIM9      | 0.20 | 0.07 | 0.13 | 0.22 | 0.21 | -0.09 | FALSE |
| Brain  | 17 | 68152783  | 68183190  | ENST00000243457.3 | KCNJ2      | 0.38 | 0.11 | 0.27 | 0.09 | 0.08 | -0.10 | FALSE |
| Brain  | 1  | 65712720  | 65745163  | ENST00000483402.1 | DNAJC6     | 0.34 | 0.10 | 0.24 | 0.24 | 0.21 | -0.16 | FALSE |
| Brain  | 11 | 6400761   | 6441884   | ENST00000533407.1 | APBB1      | 0.21 | 0.07 | 0.15 | 0.09 | 0.09 | -0.24 | FALSE |
| Brain  | 1  | 156353833 | 156405678 | ENST00000495000.1 | C1orf61    | 0.29 | 0.18 | 0.11 | 0.24 | 0.21 | -0.27 | FALSE |
| Brain  | 17 | 79345155  | 79376776  | ENST00000307745.7 | BAHCC1     | 0.54 | 0.37 | 0.17 | 0.18 | 0.17 | -0.61 | FALSE |
| Brain  | 21 | 34399873  | 34453980  | ENST00000498799.1 | OLIG1      | 0.28 | 0.18 | 0.11 | 0.19 | 0.17 | -0.63 | FALSE |
| Brain  | 11 | 119211319 | 119250680 | ENST00000527843.1 | USP2       | 0.22 | 0.10 | 0.12 | 0.19 | 0.17 | -1.23 | FALSE |
| Brain  | 10 | 88108134  | 88126246  | ENST00000327946.7 | GRID1      | 0.29 | 0.19 | 0.11 | 0.20 | 0.16 | -1.70 | FALSE |
| Breast | 10 | 121410843 | 121447500 | ENST00000450186.1 | BAG3       | 0.21 | 0.06 | 0.15 | 0.26 | 0.39 | 18.11 | TRUE  |
| Breast | 10 | 95184875  | 95242959  | ENST00000488645.1 | MYOF       | 0.21 | 0.04 | 0.17 | 0.27 | 0.42 | 15.89 | TRUE  |
| Breast | 11 | 65678179  | 65686589  | ENST00000530188.1 | C11orf68   | 0.30 | 0.14 | 0.16 | 0.32 | 0.39 | 15.28 | TRUE  |
| Breast | 1  | 207221596 | 207227576 | ENST00000367079.2 | PFKFB2     | 0.61 | 0.48 | 0.12 | 0.08 | 0.12 | 15.17 | TRUE  |
| Breast | 2  | 106009478 | 106028025 | ENST00000447958.1 | FHL2       | 0.21 | 0.08 | 0.13 | 0.14 | 0.25 | 14.92 | TRUE  |
| Breast | 11 | 6339234   | 6344196   | ENST00000530979.1 | PRKCDBP    | 0.61 | 0.34 | 0.26 | 0.14 | 0.25 | 14.91 | TRUE  |
| Breast | 1  | 156065471 | 156100930 | ENST00000392353.3 | LMNA       | 0.56 | 0.18 | 0.38 | 0.16 | 0.23 | 14.72 | TRUE  |
| Breast | 11 | 66821179  | 66830989  | ENST00000532559.1 | RHOD       | 0.33 | 0.16 | 0.17 | 0.17 | 0.26 | 14.21 | TRUE  |
| Breast | 19 | 1154329   | 1184542   | ENST00000587655.1 | SBNO2      | 0.28 | 0.10 | 0.18 | 0.30 | 0.46 | 14.12 | TRUE  |
| Breast | 11 | 114162169 | 114180527 | ENST00000545255.1 | NNMT       | 0.26 | 0.03 | 0.24 | 0.30 | 0.58 | 13.61 | TRUE  |
| Breast | 2  | 112249648 | 112262948 | ENST00000371162.4 | AC108463.3 | 0.27 | 0.08 | 0.19 | 0.03 | 0.21 | 13.38 | TRUE  |
| Breast | 19 | 13948994  | 13959464  | ENST00000591727.1 | NANOS3     | 0.68 | 0.56 | 0.13 | 0.19 | 0.30 | 13.12 | TRUE  |
| Breast | 11 | 62306073  | 62328249  | ENST00000531324.1 | AHNAK      | 0.61 | 0.34 | 0.27 | 0.17 | 0.28 | 13.12 | TRUE  |
| Breast | 2  | 87744763  | 87759323  | ENST00000359481.4 | PLGLB2     | 0.21 | 0.09 | 0.11 | 0.03 | 0.18 | 13.06 | TRUE  |
| Breast | 1  | 6637843   | 6670728   | ENST00000496707.1 | KLHL21     | 0.28 | 0.17 | 0.12 | 0.16 | 0.25 | 12.95 | TRUE  |
| Breast | 14 | 69241271  | 69268143  | ENST00000408913.2 | ZFP36L1    | 0.42 | 0.32 | 0.10 | 0.09 | 0.13 | 12.42 | TRUE  |
| Breast | 20 | 51581498  | 51597746  | ENST00000371497.4 | TSHZ2      | 0.45 | 0.16 | 0.29 | 0.17 | 0.26 | 12.06 | TRUE  |



|        |    |           |           |                   |            |      |      |      |      |      |       |      |
|--------|----|-----------|-----------|-------------------|------------|------|------|------|------|------|-------|------|
| Breast | 8  | 62622640  | 62634995  | ENST00000379449.6 | ASPH       | 0.38 | 0.21 | 0.17 | 0.18 | 0.23 | 11.50 | TRUE |
| Breast | 4  | 169752417 | 169771288 | ENST00000507735.1 | PALLD      | 0.28 | 0.16 | 0.12 | 0.10 | 0.14 | 11.46 | TRUE |
| Breast | 1  | 16156416  | 16179578  | ENST00000375759.3 | SPEN       | 0.49 | 0.37 | 0.12 | 0.08 | 0.11 | 11.33 | TRUE |
| Breast | 1  | 181055984 | 181089589 | ENST00000367577.4 | IER5       | 0.32 | 0.13 | 0.19 | 0.16 | 0.19 | 11.21 | TRUE |
| Breast | 8  | 145008274 | 145031982 | ENST00000527816.1 | PLEC       | 0.62 | 0.34 | 0.27 | 0.21 | 0.28 | 11.19 | TRUE |
| Breast | 14 | 105432978 | 105441663 | ENST00000555122.1 | AHNAK2     | 0.43 | 0.23 | 0.20 | 0.14 | 0.23 | 10.98 | TRUE |
| Breast | 15 | 75930589  | 75963120  | ENST00000569152.1 | SNX33      | 0.27 | 0.16 | 0.11 | 0.11 | 0.16 | 10.81 | TRUE |
| Breast | 15 | 68548590  | 68582156  | ENST00000566739.1 | FEM1B      | 0.25 | 0.12 | 0.13 | 0.17 | 0.25 | 10.74 | TRUE |
| Breast | 20 | 43963799  | 43990114  | ENST00000537976.1 | SDC4       | 0.33 | 0.13 | 0.21 | 0.11 | 0.16 | 10.63 | TRUE |
| Breast | 2  | 36579464  | 36605312  | ENST00000473403.1 | CRIM1      | 0.55 | 0.19 | 0.35 | 0.21 | 0.32 | 10.63 | TRUE |
| Breast | 12 | 125388867 | 125425378 | ENST00000542416.1 | UBC        | 0.39 | 0.28 | 0.11 | 0.12 | 0.15 | 10.54 | TRUE |
| Breast | 12 | 10868156  | 10877012  | ENST00000540747.1 | CSDA       | 0.79 | 0.29 | 0.50 | 0.08 | 0.15 | 10.38 | TRUE |
| Breast | 6  | 111906089 | 111928358 | ENST00000528599.1 | TRAF3IP2   | 0.33 | 0.15 | 0.18 | 0.18 | 0.25 | 10.38 | TRUE |
| Breast | 17 | 2294949   | 2311496   | ENST00000571836.2 | MNT        | 0.62 | 0.42 | 0.20 | 0.12 | 0.14 | 10.21 | TRUE |
| Breast | 10 | 33226394  | 33252825  | ENST00000439974.3 | ITGB1      | 0.30 | 0.19 | 0.10 | 0.09 | 0.12 | 10.06 | TRUE |
| Breast | 14 | 55568260  | 55575863  | ENST00000553493.1 | LGALS3     | 0.32 | 0.13 | 0.19 | 0.17 | 0.41 | 10.04 | TRUE |
| Breast | 11 | 57045039  | 57094324  | ENST00000527207.1 | TNKS1BP1   | 0.23 | 0.09 | 0.13 | 0.11 | 0.20 | 9.99  | TRUE |
| Breast | 1  | 27830256  | 27900464  | ENST00000487743.2 | AHDC1      | 0.37 | 0.09 | 0.28 | 0.33 | 0.43 | 9.98  | TRUE |
| Breast | 16 | 56638741  | 56649586  | ENST00000567300.1 | MT2A       | 0.46 | 0.27 | 0.19 | 0.20 | 0.31 | 9.81  | TRUE |
| Breast | 22 | 36718824  | 36814131  | ENST00000216181.5 | MYH9       | 0.34 | 0.16 | 0.18 | 0.18 | 0.23 | 9.73  | TRUE |
| Breast | 1  | 27183345  | 27192842  | ENST00000339276.4 | SFN        | 0.33 | 0.22 | 0.11 | 0.29 | 0.37 | 9.65  | TRUE |
| Breast | 1  | 201404474 | 201474025 | ENST00000532460.1 | CSRP1      | 0.22 | 0.10 | 0.12 | 0.19 | 0.24 | 9.49  | TRUE |
| Breast | 3  | 187453456 | 187468930 | ENST00000496823.1 | BCL6       | 0.81 | 0.63 | 0.19 | 0.09 | 0.11 | 9.49  | TRUE |
| Breast | 11 | 8828385   | 8837469   | ENST00000531237.1 | ST5        | 0.63 | 0.12 | 0.51 | 0.32 | 0.48 | 9.25  | TRUE |
| Breast | 2  | 239193425 | 239200323 | ENST00000431832.1 | PER2       | 0.73 | 0.36 | 0.37 | 0.20 | 0.28 | 9.19  | TRUE |
| Breast | 19 | 47598365  | 47618174  | ENST00000594526.1 | SAE1       | 0.46 | 0.30 | 0.16 | 0.13 | 0.16 | 9.18  | TRUE |
| Breast | 11 | 9586185   | 9600407   | ENST00000524612.1 | WEE1       | 0.46 | 0.26 | 0.21 | 0.09 | 0.13 | 8.91  | TRUE |
| Breast | 14 | 77489392  | 77513614  | ENST00000238647.3 | IRF2BPL    | 0.67 | 0.37 | 0.29 | 0.17 | 0.24 | 8.75  | TRUE |
| Breast | 5  | 131593100 | 131603174 | ENST00000418373.1 | PDLIM4     | 0.60 | 0.08 | 0.51 | 0.29 | 0.40 | 8.73  | TRUE |
| Breast | 11 | 61732568  | 61749363  | ENST00000601917.1 | AP003733.1 | 0.38 | 0.24 | 0.14 | 0.09 | 0.11 | 8.53  | TRUE |
| Breast | 1  | 45270631  | 45276266  | ENST00000482715.1 | BTBD19     | 0.65 | 0.27 | 0.38 | 0.33 | 0.40 | 8.47  | TRUE |
| Breast | 19 | 42771661  | 42788152  | ENST00000575839.1 | CIC        | 0.57 | 0.44 | 0.13 | 0.15 | 0.17 | 8.26  | TRUE |
| Breast | 12 | 52608969  | 52643707  | ENST00000544024.1 | KRT86      | 0.21 | 0.06 | 0.15 | 0.27 | 0.36 | 8.01  | TRUE |
| Breast | 7  | 869464    | 876882    | ENST00000469755.1 | SUN1       | 0.22 | 0.07 | 0.15 | 0.29 | 0.44 | 7.97  | TRUE |
| Breast | 2  | 46523740  | 46563334  | ENST00000475822.1 | EPAS1      | 0.23 | 0.13 | 0.10 | 0.13 | 0.17 | 7.61  | TRUE |
| Breast | 20 | 17537085  | 17560729  | ENST00000449141.2 | DSTN       | 0.27 | 0.12 | 0.16 | 0.15 | 0.20 | 7.60  | TRUE |
| Breast | 9  | 130280649 | 130347137 | ENST00000373314.3 | FAM129B    | 0.20 | 0.10 | 0.10 | 0.29 | 0.37 | 7.59  | TRUE |
| Breast | 22 | 30792614  | 30822843  | ENST00000407550.3 | MTFP1      | 0.36 | 0.17 | 0.19 | 0.11 | 0.13 | 7.58  | TRUE |
| Breast | 12 | 109225745 | 109251401 | ENST00000548522.1 | SSH1       | 0.24 | 0.09 | 0.15 | 0.16 | 0.24 | 7.09  | TRUE |

|        |    |           |           |                   |            |      |      |      |      |      |      |      |
|--------|----|-----------|-----------|-------------------|------------|------|------|------|------|------|------|------|
| Breast | 14 | 23292133  | 23323062  | ENST00000547596.1 | MMP14      | 0.33 | 0.15 | 0.17 | 0.13 | 0.19 | 7.09 | TRUE |
| Breast | 1  | 27320120  | 27340181  | ENST00000289166.5 | FAM46B     | 0.33 | 0.18 | 0.16 | 0.14 | 0.17 | 7.04 | TRUE |
| Breast | 1  | 8062975   | 8088860   | ENST00000487559.1 | ERRFI1     | 0.25 | 0.14 | 0.10 | 0.16 | 0.21 | 6.92 | TRUE |
| Breast | 1  | 154941228 | 154949531 | ENST00000473344.1 | CKS1B      | 0.82 | 0.52 | 0.31 | 0.14 | 0.19 | 6.71 | TRUE |
| Breast | 19 | 41220087  | 41229010  | ENST00000263370.2 | ITPKC      | 0.69 | 0.55 | 0.14 | 0.09 | 0.11 | 6.65 | TRUE |
| Breast | 7  | 41734099  | 41745805  | ENST00000442711.1 | INHBA      | 0.40 | 0.26 | 0.14 | 0.13 | 0.19 | 6.64 | TRUE |
| Breast | 15 | 42562799  | 42569003  | ENST00000567421.1 | GANC       | 0.91 | 0.51 | 0.40 | 0.06 | 0.08 | 6.58 | TRUE |
| Breast | 5  | 142773722 | 142785691 | ENST00000502500.1 | NR3C1      | 0.95 | 0.51 | 0.44 | 0.10 | 0.15 | 6.55 | TRUE |
| Breast | 1  | 16274460  | 16281222  | ENST00000494020.1 | ZBTB17     | 0.21 | 0.07 | 0.14 | 0.32 | 0.48 | 6.16 | TRUE |
| Breast | 1  | 155097310 | 155110100 | ENST00000484027.1 | SLC50A1    | 0.63 | 0.51 | 0.12 | 0.09 | 0.11 | 6.11 | TRUE |
| Breast | 11 | 118779500 | 118810391 | ENST00000534788.1 | UPK2       | 0.63 | 0.45 | 0.18 | 0.14 | 0.20 | 5.75 | TRUE |
| Breast | 17 | 27134005  | 27140821  | ENST00000582059.1 | FAM222B    | 0.45 | 0.35 | 0.10 | 0.05 | 0.08 | 5.73 | TRUE |
| Breast | 22 | 46467114  | 46488203  | ENST00000360737.3 | MIRLET7    | 1.00 | 0.47 | 0.53 | 0.25 | 0.45 | 5.64 | TRUE |
| Breast | 1  | 33207559  | 33241755  | ENST00000373480.1 | KIAA1522   | 0.22 | 0.10 | 0.12 | 0.22 | 0.27 | 5.58 | TRUE |
| Breast | 22 | 46448058  | 46467049  | ENST00000381051.2 | MIRLET7    | 1.00 | 0.50 | 0.50 | 0.20 | 0.30 | 5.57 | TRUE |
| Breast | 7  | 55085115  | 55095372  | ENST00000463948.1 | EGFR       | 0.50 | 0.21 | 0.29 | 0.19 | 0.24 | 5.29 | TRUE |
| Breast | 11 | 65238595  | 65276583  | ENST00000309775.7 | AP000769.1 | 0.63 | 0.43 | 0.20 | 0.14 | 0.18 | 5.25 | TRUE |
| Breast | 10 | 82213990  | 82238676  | ENST00000372156.1 | TSPAN14    | 0.25 | 0.14 | 0.11 | 0.13 | 0.17 | 5.20 | TRUE |
| Breast | 17 | 46122636  | 46152031  | ENST00000581319.1 | NFE2L1     | 0.28 | 0.11 | 0.17 | 0.13 | 0.15 | 5.18 | TRUE |
| Breast | 11 | 57528367  | 57568939  | ENST00000534647.1 | CTNND1     | 0.31 | 0.11 | 0.20 | 0.16 | 0.30 | 5.02 | TRUE |
| Breast | 17 | 17723596  | 17746027  | ENST00000435530.2 | SREBF1     | 0.36 | 0.25 | 0.11 | 0.14 | 0.16 | 4.99 | TRUE |
| Breast | 9  | 124030410 | 124052489 | ENST00000545652.1 | GSN        | 0.40 | 0.26 | 0.15 | 0.21 | 0.23 | 4.78 | TRUE |
| Breast | 3  | 141083866 | 141089271 | ENST00000507657.1 | ZBTB38     | 0.39 | 0.08 | 0.32 | 0.17 | 0.34 | 4.74 | TRUE |
| Breast | 17 | 17578482  | 17616584  | ENST00000471135.2 | RAI1       | 0.26 | 0.15 | 0.10 | 0.18 | 0.21 | 4.67 | TRUE |
| Breast | 11 | 12694725  | 12726400  | ENST00000334310.6 | TEAD1      | 0.27 | 0.17 | 0.10 | 0.16 | 0.19 | 4.63 | TRUE |
| Breast | 12 | 6432600   | 6452223   | ENST00000538363.1 | TNFRSF1A   | 0.50 | 0.30 | 0.19 | 0.05 | 0.08 | 4.48 | TRUE |
| Breast | 17 | 7736868   | 7749068   | ENST00000570632.1 | KDM6B      | 0.92 | 0.77 | 0.15 | 0.07 | 0.08 | 4.31 | TRUE |
| Breast | 18 | 3446318   | 3460082   | ENST00000472042.1 | TGIF1      | 0.68 | 0.56 | 0.12 | 0.06 | 0.07 | 4.19 | TRUE |
| Breast | 20 | 19954385  | 20001261  | ENST00000481837.1 | NAA20      | 0.22 | 0.09 | 0.13 | 0.15 | 0.18 | 4.18 | TRUE |
| Breast | 1  | 19247868  | 19283180  | ENST00000416166.1 | IFFO2      | 0.29 | 0.14 | 0.15 | 0.21 | 0.23 | 3.72 | TRUE |
| Breast | 3  | 29321550  | 29334286  | ENST00000456853.1 | RBMS3      | 0.65 | 0.21 | 0.45 | 0.05 | 0.07 | 3.66 | TRUE |
| Breast | 6  | 138172161 | 138196002 | ENST00000433680.1 | TNFAIP3    | 0.29 | 0.14 | 0.14 | 0.07 | 0.10 | 3.62 | TRUE |
| Breast | 12 | 59300121  | 59315174  | ENST00000548968.1 | LRIG3      | 0.39 | 0.18 | 0.21 | 0.07 | 0.09 | 3.48 | TRUE |
| Breast | 18 | 3245538   | 3270102   | ENST00000584539.1 | MYL12B     | 0.43 | 0.25 | 0.18 | 0.06 | 0.08 | 3.41 | TRUE |
| Breast | 3  | 9436165   | 9466747   | ENST00000468208.1 | SETD5      | 0.30 | 0.18 | 0.12 | 0.11 | 0.13 | 3.16 | TRUE |
| Breast | 11 | 65185034  | 65198304  | ENST00000531151.1 | FRMD8      | 1.00 | 0.88 | 0.12 | 0.10 | 0.14 | 2.99 | TRUE |
| Breast | 18 | 46449301  | 46483832  | ENST00000586093.1 | SMAD7      | 0.47 | 0.32 | 0.15 | 0.15 | 0.18 | 2.93 | TRUE |
| Breast | 9  | 14298144  | 14323961  | ENST00000493697.1 | NFIB       | 0.71 | 0.42 | 0.28 | 0.22 | 0.27 | 2.74 | TRUE |
| Breast | 3  | 193849125 | 193860857 | ENST00000476918.1 | HES1       | 0.79 | 0.61 | 0.18 | 0.07 | 0.08 | 2.64 | TRUE |

|        |    |           |           |                   |          |      |      |      |      |      |        |       |
|--------|----|-----------|-----------|-------------------|----------|------|------|------|------|------|--------|-------|
| Breast | 7  | 42257859  | 42278946  | ENST00000428534.1 | GLI3     | 0.33 | 0.17 | 0.15 | 0.20 | 0.20 | 2.56   | TRUE  |
| Breast | 21 | 36252652  | 36264673  | ENST00000399237.2 | RUNX1    | 0.93 | 0.58 | 0.35 | 0.13 | 0.17 | 2.54   | TRUE  |
| Breast | 19 | 13123147  | 13172690  | ENST00000358552.3 | NFIX     | 0.50 | 0.29 | 0.20 | 0.32 | 0.35 | 2.35   | TRUE  |
| Breast | 10 | 74002370  | 74038384  | ENST00000471240.1 | DDIT4    | 0.27 | 0.17 | 0.10 | 0.11 | 0.12 | 2.32   | TRUE  |
| Breast | 4  | 95366945  | 95386196  | ENST00000511767.1 | PDLIM5   | 0.24 | 0.11 | 0.12 | 0.08 | 0.10 | 2.31   | TRUE  |
| Breast | 19 | 16177568  | 16192210  | ENST00000588483.1 | TPM4     | 0.43 | 0.26 | 0.16 | 0.16 | 0.18 | 2.23   | TRUE  |
| Breast | 6  | 10398835  | 10421638  | ENST00000486038.1 | TFAP2A   | 0.81 | 0.68 | 0.13 | 0.19 | 0.22 | 2.02   | TRUE  |
| Breast | 2  | 43444985  | 43456496  | ENST00000282388.3 | ZFP36L2  | 1.00 | 0.88 | 0.12 | 0.05 | 0.06 | 1.99   | TRUE  |
| Breast | 15 | 93425946  | 93432559  | ENST00000555520.1 | CHD2     | 0.87 | 0.61 | 0.26 | 0.01 | 0.02 | 1.91   | TRUE  |
| Breast | 7  | 36426266  | 36435508  | ENST00000418118.1 | ANLN     | 0.36 | 0.23 | 0.12 | 0.06 | 0.07 | 1.86   | TRUE  |
| Breast | 1  | 100109973 | 100129273 | ENST00000263174.4 | PALMD    | 0.24 | 0.03 | 0.21 | 0.16 | 0.23 | 1.86   | TRUE  |
| Breast | 14 | 74207241  | 74227902  | ENST00000421708.1 | ELMSAN1  | 0.58 | 0.41 | 0.18 | 0.12 | 0.13 | 1.80   | TRUE  |
| Breast | 19 | 49375182  | 49379790  | ENST00000600406.1 | PPP1R15A | 0.78 | 0.60 | 0.18 | 0.07 | 0.09 | 1.63   | TRUE  |
| Breast | 20 | 10634437  | 10656669  | ENST00000254958.4 | JAG1     | 0.49 | 0.22 | 0.27 | 0.06 | 0.06 | 1.58   | TRUE  |
| Breast | 1  | 59245181  | 59252471  | ENST00000371222.2 | JUN      | 0.86 | 0.61 | 0.25 | 0.05 | 0.05 | 1.42   | TRUE  |
| Breast | 4  | 103736345 | 103751180 | ENST00000503282.1 | UBE2D3   | 0.48 | 0.36 | 0.11 | 0.05 | 0.06 | 1.39   | TRUE  |
| Breast | 20 | 34326330  | 34331841  | ENST00000493853.1 | RBM39    | 0.91 | 0.74 | 0.17 | 0.05 | 0.05 | 1.38   | TRUE  |
| Breast | 10 | 106080462 | 106112294 | ENST00000458723.1 | ITPRIP   | 0.31 | 0.19 | 0.12 | 0.19 | 0.19 | 1.27   | FALSE |
| Breast | 16 | 23152633  | 23161835  | ENST00000219689.7 | USP31    | 0.37 | 0.24 | 0.12 | 0.02 | 0.03 | 1.01   | FALSE |
| Breast | 4  | 146653244 | 146658422 | ENST00000510096.1 | C4orf51  | 0.68 | 0.29 | 0.39 | 0.04 | 0.05 | 0.98   | FALSE |
| Breast | 6  | 74224616  | 74234296  | ENST00000455918.1 | EEF1A1   | 0.79 | 0.59 | 0.21 | 0.07 | 0.08 | 0.87   | FALSE |
| Breast | 6  | 136605683 | 136612552 | ENST00000528229.1 | BCLAF1   | 0.54 | 0.42 | 0.12 | 0.03 | 0.04 | 0.87   | FALSE |
| Breast | 6  | 121756401 | 121769000 | ENST00000282561.3 | GJA1     | 0.38 | 0.18 | 0.19 | 0.15 | 0.20 | 0.80   | FALSE |
| Breast | 15 | 50644604  | 50649357  | ENST00000560896.1 | GABPB1   | 0.96 | 0.80 | 0.15 | 0.04 | 0.04 | 0.79   | FALSE |
| Breast | 16 | 15735275  | 15740014  | ENST00000396353.2 | NDE1     | 0.64 | 0.54 | 0.10 | 0.04 | 0.04 | 0.76   | FALSE |
| Breast | 10 | 74051120  | 74097380  | ENST00000473051.1 | DNAJB12  | 0.27 | 0.14 | 0.13 | 0.13 | 0.13 | 0.68   | FALSE |
| Breast | 5  | 1881509   | 1890183   | ENST00000513692.1 | IRX4     | 0.97 | 0.78 | 0.19 | 0.19 | 0.22 | 0.63   | FALSE |
| Breast | 7  | 115849775 | 115868787 | ENST00000485009.1 | TES      | 0.21 | 0.11 | 0.10 | 0.05 | 0.06 | 0.60   | FALSE |
| Breast | 2  | 12841318  | 12863362  | ENST00000405331.3 | TRIB2    | 0.35 | 0.19 | 0.17 | 0.09 | 0.11 | 0.26   | FALSE |
| Breast | 9  | 33157786  | 33167403  | ENST00000379731.4 | B4GALT1  | 0.92 | 0.42 | 0.50 | 0.14 | 0.14 | -0.02  | FALSE |
| Breast | 10 | 112252889 | 112273435 | ENST00000468749.1 | DUSP5    | 0.37 | 0.21 | 0.16 | 0.24 | 0.26 | -0.15  | FALSE |
| Breast | 5  | 67510759  | 67574308  | ENST00000520675.1 | PIK3R1   | 0.27 | 0.10 | 0.16 | 0.08 | 0.07 | -0.34  | FALSE |
| Breast | 3  | 71104592  | 71120542  | ENST00000497553.1 | FOXP1    | 0.41 | 0.28 | 0.13 | 0.13 | 0.12 | -0.62  | FALSE |
| Breast | 5  | 2739262   | 2759651   | ENST00000502957.1 | IRX2     | 0.92 | 0.80 | 0.11 | 0.23 | 0.20 | -1.21  | FALSE |
| Breast | 5  | 140887653 | 140909039 | ENST00000468119.1 | DIAPH1   | 0.23 | 0.11 | 0.12 | 0.32 | 0.26 | -2.92  | FALSE |
| Breast | 8  | 116659885 | 116682409 | ENST00000451156.1 | TRPS1    | 0.42 | 0.17 | 0.26 | 0.20 | 0.15 | -3.13  | FALSE |
| Breast | 12 | 109082915 | 109097018 | ENST00000547170.1 | CORO1C   | 0.31 | 0.21 | 0.11 | 0.24 | 0.14 | -14.35 | FALSE |
| CD19   | 17 | 56394652  | 56423683  | ENST00000583624.1 | BZRAP1   | 0.46 | 0.16 | 0.31 | 0.20 | 0.41 | 39.73  | TRUE  |
| CD19   | 1  | 111401311 | 111424334 | ENST00000476408.1 | CD53     | 0.29 | 0.00 | 0.29 | 0.12 | 0.41 | 37.85  | TRUE  |

|      |    |           |           |                   |           |      |      |      |      |      |       |      |
|------|----|-----------|-----------|-------------------|-----------|------|------|------|------|------|-------|------|
| CD19 | 16 | 85965145  | 85983944  | ENST00000569607.1 | IRF8      | 0.21 | 0.02 | 0.19 | 0.30 | 0.57 | 37.13 | TRUE |
| CD19 | 6  | 13258837  | 13278907  | ENST00000481706.1 | PHACTR1   | 0.29 | 0.01 | 0.28 | 0.19 | 0.58 | 36.71 | TRUE |
| CD19 | 2  | 233923908 | 233972771 | ENST00000467393.1 | INPP5D    | 0.29 | 0.05 | 0.24 | 0.19 | 0.42 | 35.52 | TRUE |
| CD19 | 1  | 31201550  | 31236569  | ENST00000476492.1 | LAPTM5    | 0.30 | 0.04 | 0.26 | 0.31 | 0.56 | 31.68 | TRUE |
| CD19 | 22 | 50627294  | 50632183  | ENST00000395829.1 | TRABD     | 0.69 | 0.28 | 0.41 | 0.15 | 0.42 | 30.04 | TRUE |
| CD19 | 18 | 74764261  | 74781577  | ENST00000580473.1 | MBP       | 0.29 | 0.13 | 0.16 | 0.28 | 0.54 | 29.54 | TRUE |
| CD19 | 10 | 11184898  | 11223017  | ENST00000537122.1 | CELF2     | 0.32 | 0.06 | 0.26 | 0.13 | 0.29 | 28.19 | TRUE |
| CD19 | 6  | 32807846  | 32814107  | ENST00000414474.1 | PSMB9     | 0.52 | 0.30 | 0.22 | 0.16 | 0.23 | 25.92 | TRUE |
| CD19 | 1  | 167584400 | 167603373 | ENST00000537350.1 | RCSD1     | 0.37 | 0.08 | 0.29 | 0.20 | 0.36 | 25.14 | TRUE |
| CD19 | 1  | 150122093 | 150138999 | ENST00000485470.1 | PLEKHO1   | 0.34 | 0.13 | 0.20 | 0.10 | 0.21 | 24.45 | TRUE |
| CD19 | 9  | 134127597 | 134154499 | ENST00000464831.1 | FAM78A    | 0.35 | 0.11 | 0.24 | 0.16 | 0.30 | 24.20 | TRUE |
| CD19 | 1  | 206730430 | 206756416 | ENST00000304534.8 | RASSF5    | 0.25 | 0.05 | 0.19 | 0.16 | 0.27 | 22.59 | TRUE |
| CD19 | 13 | 41534432  | 41594336  | ENST00000239882.3 | ELF1      | 0.21 | 0.08 | 0.13 | 0.09 | 0.31 | 21.93 | TRUE |
| CD19 | 12 | 57869667  | 57876031  | ENST00000552249.1 | ARHGAP9   | 0.56 | 0.14 | 0.42 | 0.26 | 0.40 | 21.40 | TRUE |
| CD19 | 14 | 61937696  | 61947119  | ENST00000536400.1 | PRKCH     | 0.33 | 0.04 | 0.29 | 0.04 | 0.29 | 19.40 | TRUE |
| CD19 | 7  | 50344148  | 50370755  | ENST00000426121.1 | IKZF1     | 0.41 | 0.07 | 0.35 | 0.20 | 0.42 | 19.07 | TRUE |
| CD19 | 21 | 44817042  | 44836022  | ENST00000478426.1 | SIK1      | 0.22 | 0.05 | 0.17 | 0.30 | 0.58 | 18.82 | TRUE |
| CD19 | 11 | 128582503 | 128610944 | ENST00000534087.1 | FLI1      | 0.28 | 0.04 | 0.24 | 0.14 | 0.36 | 17.88 | TRUE |
| CD19 | 3  | 122291690 | 122308644 | ENST00000483793.1 | PARP15    | 0.20 | 0.04 | 0.16 | 0.13 | 0.29 | 17.63 | TRUE |
| CD19 | 17 | 43299369  | 43312992  | ENST00000591434.1 | FMNL1     | 0.55 | 0.16 | 0.39 | 0.17 | 0.30 | 17.34 | TRUE |
| CD19 | 22 | 37613897  | 37642449  | ENST00000401529.3 | RAC2      | 0.28 | 0.09 | 0.18 | 0.07 | 0.12 | 17.11 | TRUE |
| CD19 | 2  | 238580170 | 238610065 | ENST00000473815.1 | LRRFIP1   | 0.35 | 0.19 | 0.16 | 0.13 | 0.24 | 16.12 | TRUE |
| CD19 | 20 | 55964442  | 55977216  | ENST00000371219.2 | RBM38     | 0.53 | 0.33 | 0.20 | 0.15 | 0.24 | 15.94 | TRUE |
| CD19 | 21 | 45660565  | 45668530  | ENST00000400377.3 | ICOSLG    | 0.72 | 0.38 | 0.34 | 0.08 | 0.14 | 15.33 | TRUE |
| CD19 | 14 | 105116134 | 105145145 | ENST00000330634.7 | INF2      | 0.23 | 0.12 | 0.11 | 0.14 | 0.28 | 15.28 | TRUE |
| CD19 | 1  | 26609716  | 26620076  | ENST00000319041.6 | SH3BGRL3  | 0.40 | 0.03 | 0.37 | 0.24 | 0.41 | 14.66 | TRUE |
| CD19 | 1  | 53096945  | 53108122  | ENST00000424164.1 | FAM159A   | 0.35 | 0.08 | 0.27 | 0.19 | 0.26 | 13.94 | TRUE |
| CD19 | 22 | 24821855  | 24835079  | ENST00000439591.1 | ADORA2A   | 0.26 | 0.02 | 0.25 | 0.32 | 0.60 | 13.11 | TRUE |
| CD19 | 19 | 2610475   | 2632474   | ENST00000587867.1 | GNG7      | 0.31 | 0.09 | 0.22 | 0.10 | 0.17 | 12.71 | TRUE |
| CD19 | 13 | 46942847  | 46975976  | ENST00000480935.1 | KIAA0226L | 0.24 | 0.08 | 0.16 | 0.07 | 0.10 | 12.28 | TRUE |
| CD19 | 20 | 4789416   | 4805261   | ENST00000379400.3 | RASSF2    | 0.41 | 0.18 | 0.23 | 0.22 | 0.36 | 12.12 | TRUE |
| CD19 | 4  | 56812204  | 56816635  | ENST00000257287.4 | CEP135    | 0.73 | 0.52 | 0.21 | 0.11 | 0.14 | 12.05 | TRUE |
| CD19 | 8  | 56790857  | 56809092  | ENST00000520220.1 | LYN       | 0.35 | 0.10 | 0.25 | 0.13 | 0.21 | 11.96 | TRUE |
| CD19 | 6  | 159459555 | 159485569 | ENST00000338313.5 | TAGAP     | 0.27 | 0.05 | 0.22 | 0.13 | 0.25 | 11.68 | TRUE |
| CD19 | 17 | 29814146  | 29838313  | ENST00000578694.1 | RAB11FIP4 | 0.24 | 0.11 | 0.13 | 0.14 | 0.26 | 11.44 | TRUE |
| CD19 | 19 | 35807029  | 35840479  | ENST00000593704.1 | CD22      | 0.26 | 0.02 | 0.24 | 0.22 | 0.56 | 11.25 | TRUE |
| CD19 | 19 | 13204800  | 13217457  | ENST00000590120.1 | LYL1      | 0.94 | 0.34 | 0.60 | 0.21 | 0.44 | 11.15 | TRUE |
| CD19 | 11 | 67034303  | 67056724  | ENST00000447274.2 | ANKRD13D  | 0.40 | 0.23 | 0.17 | 0.12 | 0.23 | 10.45 | TRUE |
| CD19 | 11 | 73076425  | 73101853  | ENST00000393580.2 | RELT      | 0.21 | 0.06 | 0.15 | 0.13 | 0.18 | 10.21 | TRUE |

|      |    |           |           |                   |            |      |      |      |      |      |      |      |
|------|----|-----------|-----------|-------------------|------------|------|------|------|------|------|------|------|
| CD19 | 11 | 9621558   | 9642085   | ENST00000527848.1 | WEE1       | 0.21 | 0.09 | 0.12 | 0.06 | 0.11 | 9.86 | TRUE |
| CD19 | 9  | 35616119  | 35651731  | ENST00000474403.1 | SIT1       | 0.23 | 0.07 | 0.16 | 0.15 | 0.23 | 9.35 | TRUE |
| CD19 | 15 | 74666045  | 74697205  | ENST00000268053.6 | CYP11A1    | 0.31 | 0.12 | 0.19 | 0.26 | 0.34 | 8.30 | TRUE |
| CD19 | 1  | 111734737 | 111768995 | ENST00000445067.2 | CHI3L2     | 0.20 | 0.06 | 0.14 | 0.09 | 0.12 | 8.24 | TRUE |
| CD19 | 6  | 41671523  | 41703442  | ENST00000433032.1 | TFEB       | 0.33 | 0.15 | 0.18 | 0.18 | 0.23 | 8.08 | TRUE |
| CD19 | 6  | 32904722  | 32916498  | ENST00000416244.2 | HLA-DMB    | 0.27 | 0.09 | 0.18 | 0.16 | 0.31 | 7.98 | TRUE |
| CD19 | 1  | 66795175  | 66818506  | ENST00000526197.1 | PDE4B      | 0.28 | 0.18 | 0.10 | 0.13 | 0.25 | 7.81 | TRUE |
| CD19 | 16 | 85921635  | 85951991  | ENST00000569607.1 | IRF8       | 0.29 | 0.05 | 0.24 | 0.22 | 0.37 | 7.79 | TRUE |
| CD19 | 3  | 196350844 | 196371448 | ENST00000426755.1 | PIGX       | 0.34 | 0.14 | 0.20 | 0.12 | 0.18 | 7.65 | TRUE |
| CD19 | 9  | 130665468 | 130681316 | ENST00000479747.1 | ST6GALNAC4 | 0.33 | 0.18 | 0.16 | 0.09 | 0.13 | 7.17 | TRUE |
| CD19 | 6  | 31547188  | 31556914  | ENST00000464044.1 | LST1       | 0.57 | 0.18 | 0.40 | 0.19 | 0.25 | 6.59 | TRUE |
| CD19 | 6  | 149785200 | 149817360 | ENST00000462655.1 | ZC3H12D    | 0.28 | 0.04 | 0.24 | 0.17 | 0.35 | 6.58 | TRUE |
| CD19 | 12 | 46657445  | 46665336  | ENST00000546519.1 | SLC38A1    | 0.57 | 0.45 | 0.12 | 0.10 | 0.17 | 6.45 | TRUE |
| CD19 | 11 | 58967706  | 58992697  | ENST00000361050.3 | MPEG1      | 0.22 | 0.02 | 0.20 | 0.29 | 0.50 | 6.35 | TRUE |
| CD19 | 1  | 207078366 | 207106998 | ENST00000487208.1 | PIGR       | 0.23 | 0.05 | 0.18 | 0.20 | 0.38 | 6.25 | TRUE |
| CD19 | 12 | 48196588  | 48213374  | ENST00000445237.2 | HDAC7      | 0.40 | 0.23 | 0.17 | 0.11 | 0.15 | 6.14 | TRUE |
| CD19 | 2  | 54783925  | 54824402  | ENST00000333896.5 | SPTBN1     | 0.27 | 0.15 | 0.12 | 0.08 | 0.13 | 6.13 | TRUE |
| CD19 | 2  | 197013308 | 197048452 | ENST00000449152.1 | STK17B     | 0.42 | 0.07 | 0.34 | 0.07 | 0.12 | 5.81 | TRUE |
| CD19 | 2  | 71290385  | 71301563  | ENST00000524537.1 | NAGK       | 0.39 | 0.21 | 0.18 | 0.07 | 0.10 | 5.74 | TRUE |
| CD19 | 6  | 32402294  | 32411438  | ENST00000374982.5 | HLA-DRA    | 0.36 | 0.10 | 0.26 | 0.24 | 0.36 | 5.34 | TRUE |
| CD19 | 19 | 42374270  | 42392833  | ENST00000337665.4 | ARHGEF1    | 0.44 | 0.19 | 0.25 | 0.15 | 0.23 | 5.12 | TRUE |
| CD19 | 10 | 49874683  | 49897623  | ENST00000360890.2 | WDFY4      | 0.25 | 0.00 | 0.25 | 0.30 | 0.59 | 5.11 | TRUE |
| CD19 | 17 | 74476430  | 74497452  | ENST00000590288.1 | RHBDF2     | 0.36 | 0.13 | 0.23 | 0.27 | 0.38 | 4.87 | TRUE |
| CD19 | 1  | 154914194 | 154929302 | ENST00000490230.1 | PBXIP1     | 0.29 | 0.16 | 0.12 | 0.16 | 0.21 | 4.81 | TRUE |
| CD19 | 20 | 44736001  | 44751095  | ENST00000461171.1 | CD40       | 0.21 | 0.09 | 0.12 | 0.06 | 0.15 | 4.79 | TRUE |
| CD19 | 3  | 13034134  | 13065411  | ENST00000473088.1 | IQSEC1     | 0.30 | 0.15 | 0.15 | 0.16 | 0.23 | 4.63 | TRUE |
| CD19 | 11 | 72850513  | 72872020  | ENST00000422375.1 | FCHSD2     | 0.41 | 0.17 | 0.24 | 0.10 | 0.13 | 4.54 | TRUE |
| CD19 | 19 | 18278723  | 18292546  | ENST00000600463.1 | IFI30      | 0.23 | 0.10 | 0.13 | 0.15 | 0.25 | 4.49 | TRUE |
| CD19 | 2  | 136871650 | 136898787 | ENST00000466288.1 | CXCR4      | 0.33 | 0.14 | 0.18 | 0.06 | 0.08 | 4.31 | TRUE |
| CD19 | 11 | 61120450  | 61130574  | ENST00000423772.2 | TMEM138    | 0.45 | 0.20 | 0.25 | 0.21 | 0.23 | 4.29 | TRUE |
| CD19 | 15 | 75066062  | 75093388  | ENST00000569321.1 | CSK        | 0.51 | 0.25 | 0.27 | 0.13 | 0.18 | 4.20 | TRUE |
| CD19 | 16 | 11758829  | 11785379  | ENST00000575349.1 | TXNDC11    | 0.22 | 0.10 | 0.12 | 0.10 | 0.11 | 4.16 | TRUE |
| CD19 | 16 | 10959821  | 11016093  | ENST00000572665.1 | CIITA      | 0.28 | 0.07 | 0.20 | 0.11 | 0.23 | 4.05 | TRUE |
| CD19 | 15 | 57571264  | 57599710  | ENST00000560948.1 | TCF12      | 0.24 | 0.04 | 0.19 | 0.16 | 0.22 | 4.02 | TRUE |
| CD19 | 14 | 106313303 | 106330974 | ENST00000482999.1 | KIAA0125   | 0.51 | 0.00 | 0.51 | 0.31 | 0.59 | 4.00 | TRUE |
| CD19 | 19 | 2040263   | 2096653   | ENST00000395307.2 | IZUMO4     | 0.32 | 0.19 | 0.13 | 0.18 | 0.24 | 3.98 | TRUE |
| CD19 | 16 | 81803418  | 81877366  | ENST00000569523.1 | PLCG2      | 0.26 | 0.02 | 0.24 | 0.24 | 0.26 | 3.96 | TRUE |
| CD19 | 8  | 56751994  | 56758932  | ENST00000519728.1 | LYN        | 0.54 | 0.24 | 0.30 | 0.04 | 0.08 | 3.70 | TRUE |
| CD19 | 2  | 231729691 | 231744201 | ENST00000492029.1 | ITM2C      | 0.33 | 0.19 | 0.14 | 0.24 | 0.34 | 3.70 | TRUE |

|      |    |           |           |                   |             |      |      |      |      |      |      |       |
|------|----|-----------|-----------|-------------------|-------------|------|------|------|------|------|------|-------|
| CD19 | 10 | 112618797 | 112633729 | ENST00000444997.1 | PDCD4       | 0.35 | 0.25 | 0.11 | 0.08 | 0.11 | 3.69 | TRUE  |
| CD19 | 14 | 105524940 | 105537562 | ENST00000546679.1 | GPR132      | 0.32 | 0.05 | 0.27 | 0.29 | 0.48 | 3.56 | TRUE  |
| CD19 | 6  | 106957303 | 106996547 | ENST00000487681.1 | AIM1        | 0.26 | 0.13 | 0.13 | 0.11 | 0.17 | 3.39 | TRUE  |
| CD19 | 1  | 38937882  | 38948718  | ENST00000474456.1 | RRAGC       | 0.22 | 0.06 | 0.16 | 0.19 | 0.32 | 3.28 | TRUE  |
| CD19 | 22 | 42304034  | 42337858  | ENST00000472374.2 | CENPM       | 0.44 | 0.22 | 0.22 | 0.22 | 0.28 | 3.26 | TRUE  |
| CD19 | 2  | 202106787 | 202128005 | ENST00000429881.1 | CASP8       | 0.21 | 0.10 | 0.11 | 0.15 | 0.20 | 3.18 | TRUE  |
| CD19 | 17 | 27064086  | 27073896  | ENST00000584944.1 | TRAF4       | 0.48 | 0.35 | 0.13 | 0.12 | 0.13 | 3.14 | TRUE  |
| CD19 | 12 | 7044970   | 7072648   | ENST00000537533.1 | PTPN6       | 0.36 | 0.21 | 0.15 | 0.20 | 0.27 | 3.12 | TRUE  |
| CD19 | 4  | 82389749  | 82394691  | ENST00000507538.1 | RASGEF1B    | 0.74 | 0.59 | 0.14 | 0.08 | 0.09 | 3.09 | TRUE  |
| CD19 | 12 | 92527263  | 92581890  | ENST00000552315.1 | BTG1        | 0.30 | 0.14 | 0.15 | 0.07 | 0.07 | 3.06 | TRUE  |
| CD19 | 16 | 28921620  | 28948628  | ENST00000567368.1 | CD19        | 0.20 | 0.10 | 0.11 | 0.20 | 0.30 | 2.96 | TRUE  |
| CD19 | 4  | 185452534 | 185460044 | ENST00000393593.3 | IRF2        | 0.39 | 0.25 | 0.14 | 0.15 | 0.19 | 2.90 | TRUE  |
| CD19 | 22 | 18476769  | 18494405  | ENST00000424046.1 | MICAL3      | 0.32 | 0.12 | 0.19 | 0.18 | 0.31 | 2.86 | TRUE  |
| CD19 | 15 | 86229664  | 86252170  | ENST00000560482.1 | AKAP13      | 0.31 | 0.05 | 0.26 | 0.24 | 0.38 | 2.74 | TRUE  |
| CD19 | 17 | 3807403   | 3821299   | ENST00000571637.1 | P2RX1       | 0.34 | 0.10 | 0.24 | 0.30 | 0.47 | 2.74 | TRUE  |
| CD19 | 15 | 45001549  | 45023195  | ENST00000561237.1 | TRIM69      | 0.36 | 0.24 | 0.12 | 0.09 | 0.13 | 2.68 | TRUE  |
| CD19 | 2  | 46761453  | 46803094  | ENST00000473428.1 | RHOQ        | 0.24 | 0.09 | 0.15 | 0.05 | 0.06 | 2.66 | TRUE  |
| CD19 | 12 | 9788063   | 9838708   | ENST00000544322.1 | CLEC2D      | 0.20 | 0.06 | 0.14 | 0.15 | 0.17 | 2.63 | TRUE  |
| CD19 | 6  | 167362856 | 167374276 | ENST00000496851.2 | RNASET2     | 0.36 | 0.20 | 0.16 | 0.11 | 0.12 | 2.16 | TRUE  |
| CD19 | 7  | 142490667 | 142511468 | ENST00000463701.1 | PRSS1       | 0.26 | 0.12 | 0.14 | 0.12 | 0.14 | 2.14 | TRUE  |
| CD19 | 7  | 86840957  | 86850205  | ENST00000455575.1 | TMEM243     | 0.59 | 0.31 | 0.28 | 0.07 | 0.08 | 2.08 | TRUE  |
| CD19 | 1  | 2477758   | 2482788   | ENST00000426449.1 | TNFRSF14    | 0.72 | 0.59 | 0.12 | 0.11 | 0.14 | 2.03 | TRUE  |
| CD19 | 7  | 150100445 | 150107156 | ENST00000474836.1 | ZNF775      | 0.56 | 0.35 | 0.21 | 0.15 | 0.21 | 1.88 | TRUE  |
| CD19 | 4  | 40289700  | 40319643  | ENST00000310169.2 | CHRNA9      | 0.21 | 0.06 | 0.14 | 0.08 | 0.15 | 1.71 | TRUE  |
| CD19 | 8  | 134509931 | 134514822 | ENST00000520020.1 | ST3GAL1     | 0.60 | 0.12 | 0.48 | 0.25 | 0.29 | 1.71 | TRUE  |
| CD19 | 17 | 75396031  | 75469717  | ENST00000593189.1 | SEPT9       | 0.28 | 0.15 | 0.12 | 0.27 | 0.31 | 1.48 | TRUE  |
| CD19 | 11 | 58340596  | 58348101  | ENST00000389919.4 | ZFP91-CNTF  | 0.83 | 0.52 | 0.31 | 0.07 | 0.07 | 1.29 | FALSE |
| CD19 | 9  | 3524176   | 3529109   | ENST00000449190.1 | RFX3        | 0.90 | 0.77 | 0.13 | 0.06 | 0.07 | 1.25 | FALSE |
| CD19 | 7  | 138778458 | 138805019 | ENST00000471652.1 | ZC3HAV1     | 0.29 | 0.12 | 0.17 | 0.10 | 0.12 | 1.22 | FALSE |
| CD19 | 2  | 232255961 | 232260646 | ENST00000287590.5 | B3GNT7      | 0.54 | 0.13 | 0.41 | 0.32 | 0.37 | 1.15 | FALSE |
| CD19 | 19 | 50917413  | 50938549  | ENST00000357701.5 | MYBPC2      | 0.42 | 0.26 | 0.16 | 0.22 | 0.24 | 1.12 | FALSE |
| CD19 | 14 | 23018284  | 23039986  | ENST00000557595.1 | AE000662.92 | 0.25 | 0.10 | 0.15 | 0.05 | 0.05 | 1.04 | FALSE |
| CD19 | 12 | 110431794 | 110453837 | ENST00000261739.4 | ANKRD13A    | 0.28 | 0.16 | 0.12 | 0.07 | 0.07 | 0.71 | FALSE |
| CD19 | 14 | 50327610  | 50337580  | ENST00000298310.5 | NEMF        | 0.50 | 0.38 | 0.12 | 0.04 | 0.04 | 0.70 | FALSE |
| CD19 | 3  | 58318904  | 58343543  | ENST00000491164.1 | PXK         | 0.25 | 0.07 | 0.18 | 0.02 | 0.03 | 0.61 | FALSE |
| CD19 | 17 | 38004143  | 38027814  | ENST00000377940.3 | ZPBP2       | 0.26 | 0.05 | 0.21 | 0.32 | 0.34 | 0.52 | FALSE |
| CD19 | 8  | 29937591  | 29951059  | ENST00000521083.1 | TMEM66      | 0.29 | 0.18 | 0.11 | 0.04 | 0.04 | 0.15 | FALSE |
| CD19 | 19 | 10712789  | 10716244  | ENST00000407327.4 | SLC44A2     | 0.80 | 0.58 | 0.21 | 0.16 | 0.17 | 0.14 | FALSE |
| CD19 | 2  | 196511447 | 196525260 | ENST00000418005.1 | SLC39A10    | 0.39 | 0.26 | 0.13 | 0.03 | 0.03 | 0.00 | FALSE |

|       |    |           |           |                   |             |      |      |      |      |      |       |       |
|-------|----|-----------|-----------|-------------------|-------------|------|------|------|------|------|-------|-------|
| CD19  | 5  | 122109910 | 122117182 | ENST00000514949.1 | SNX2        | 0.41 | 0.31 | 0.11 | 0.08 | 0.07 | -0.04 | FALSE |
| CD19  | 16 | 15728212  | 15738278  | ENST00000396353.2 | NDE1        | 0.42 | 0.28 | 0.14 | 0.04 | 0.04 | -0.07 | FALSE |
| CD19  | 19 | 39887963  | 39904206  | ENST00000438123.1 | PLEKHG2     | 0.70 | 0.60 | 0.10 | 0.08 | 0.07 | -0.13 | FALSE |
| CD19  | 18 | 2634081   | 2658907   | ENST00000261598.8 | SMCHD1      | 0.25 | 0.15 | 0.10 | 0.10 | 0.09 | -0.24 | FALSE |
| CD19  | 22 | 31680149  | 31688920  | ENST00000443175.1 | PIK3IP1     | 0.44 | 0.33 | 0.11 | 0.08 | 0.08 | -0.27 | FALSE |
| CD19  | 17 | 38473833  | 38487686  | ENST00000582914.1 | RARA        | 0.58 | 0.44 | 0.14 | 0.16 | 0.15 | -0.31 | FALSE |
| CD19  | 11 | 122930787 | 122942297 | ENST00000531063.1 | HSPA8       | 0.53 | 0.34 | 0.19 | 0.15 | 0.15 | -0.44 | FALSE |
| CD19  | 11 | 82763568  | 82785588  | ENST00000533276.1 | RAB30       | 0.31 | 0.16 | 0.15 | 0.05 | 0.05 | -0.74 | FALSE |
| CD19  | 2  | 128144112 | 128148979 | ENST00000409179.2 | MAP3K2      | 0.62 | 0.45 | 0.17 | 0.14 | 0.12 | -0.84 | FALSE |
| CD19  | 14 | 64966362  | 64978672  | ENST00000555321.1 | ZBTB1       | 0.55 | 0.37 | 0.18 | 0.11 | 0.09 | -1.91 | FALSE |
| CD19  | 1  | 40838755  | 40871047  | ENST00000539317.1 | SMAP2       | 0.22 | 0.08 | 0.14 | 0.10 | 0.07 | -2.81 | FALSE |
| CD19  | 1  | 27984903  | 27990153  | ENST00000339145.4 | IFI6        | 0.51 | 0.32 | 0.18 | 0.14 | 0.10 | -3.04 | FALSE |
| Colon | 5  | 79542438  | 79554102  | ENST00000513907.1 | SERINC5     | 0.51 | 0.26 | 0.25 | 0.13 | 0.18 | 14.54 | TRUE  |
| Colon | 10 | 90638872  | 90664402  | ENST00000371924.1 | STAMBPL1    | 0.20 | 0.07 | 0.13 | 0.09 | 0.13 | 13.17 | TRUE  |
| Colon | 15 | 75072089  | 75083506  | ENST00000567571.1 | CSK         | 0.80 | 0.52 | 0.28 | 0.08 | 0.11 | 10.57 | TRUE  |
| Colon | 10 | 134259441 | 134282106 | ENST00000392630.3 | C10orf91    | 0.26 | 0.12 | 0.14 | 0.26 | 0.32 | 9.61  | TRUE  |
| Colon | 1  | 37936771  | 37953471  | ENST00000471012.1 | ZC3H12A     | 0.49 | 0.34 | 0.15 | 0.16 | 0.19 | 9.15  | TRUE  |
| Colon | 19 | 1256417   | 1263739   | ENST00000589161.1 | CIRBP       | 0.65 | 0.52 | 0.13 | 0.15 | 0.18 | 8.78  | TRUE  |
| Colon | 19 | 1852750   | 1865843   | ENST00000592313.1 | KLF16       | 0.63 | 0.51 | 0.12 | 0.07 | 0.09 | 8.29  | TRUE  |
| Colon | 3  | 49056900  | 49060957  | ENST00000480392.1 | NDUFAF3     | 0.84 | 0.67 | 0.17 | 0.10 | 0.11 | 8.01  | TRUE  |
| Colon | 17 | 27275334  | 27280852  | ENST00000577182.1 | PIPOX       | 1.00 | 0.86 | 0.14 | 0.08 | 0.09 | 7.92  | TRUE  |
| Colon | 16 | 2028149   | 2036628   | ENST00000567719.1 | GFER        | 0.59 | 0.43 | 0.16 | 0.16 | 0.19 | 7.14  | TRUE  |
| Colon | 11 | 130013608 | 130061419 | ENST00000530376.1 | ST14        | 0.22 | 0.05 | 0.16 | 0.21 | 0.26 | 7.07  | TRUE  |
| Colon | 6  | 33538390  | 33559780  | ENST00000374458.1 | GGNBP1      | 0.27 | 0.16 | 0.12 | 0.13 | 0.15 | 6.84  | TRUE  |
| Colon | 2  | 220109452 | 220119946 | ENST00000392088.2 | TUBA4A      | 0.53 | 0.40 | 0.12 | 0.07 | 0.09 | 6.77  | TRUE  |
| Colon | 9  | 140187219 | 140215940 | ENST00000356628.2 | NRARP       | 0.53 | 0.40 | 0.13 | 0.24 | 0.29 | 5.89  | TRUE  |
| Colon | 7  | 150052314 | 150083105 | ENST00000486297.1 | ZNF775      | 0.36 | 0.21 | 0.15 | 0.14 | 0.16 | 5.67  | TRUE  |
| Colon | 14 | 50465553  | 50471375  | ENST00000529902.1 | C14orf182   | 0.66 | 0.45 | 0.22 | 0.11 | 0.12 | 5.40  | TRUE  |
| Colon | 6  | 74224863  | 74234116  | ENST00000455918.1 | EEF1A1      | 0.90 | 0.58 | 0.32 | 0.10 | 0.12 | 5.13  | TRUE  |
| Colon | 6  | 31700974  | 31708664  | ENST00000493662.2 | MSH5-SAPCD1 | 0.87 | 0.70 | 0.18 | 0.11 | 0.12 | 4.92  | TRUE  |
| Colon | 1  | 1092807   | 1104591   | ENST00000506177.1 | TTLL10      | 0.35 | 0.19 | 0.16 | 0.29 | 0.34 | 4.42  | TRUE  |
| Colon | 7  | 1486269   | 1507327   | ENST00000297508.7 | MICALL2     | 0.35 | 0.23 | 0.12 | 0.09 | 0.11 | 4.22  | TRUE  |
| Colon | 17 | 4845115   | 4854686   | ENST00000519300.1 | ENO3        | 0.72 | 0.58 | 0.13 | 0.11 | 0.12 | 3.71  | TRUE  |
| Colon | 16 | 29830344  | 29838029  | ENST00000570234.1 | MVP         | 0.48 | 0.28 | 0.19 | 0.28 | 0.35 | 3.49  | TRUE  |
| Colon | 1  | 153503987 | 153511480 | ENST00000462951.2 | S100A6      | 0.39 | 0.26 | 0.13 | 0.07 | 0.09 | 3.38  | TRUE  |
| Colon | 4  | 102266379 | 102270939 | ENST00000529296.1 | AP001816.1  | 0.94 | 0.80 | 0.14 | 0.05 | 0.06 | 3.03  | TRUE  |
| Colon | 7  | 100608082 | 100627662 | ENST00000536621.1 | MUC12       | 0.30 | 0.20 | 0.11 | 0.27 | 0.29 | 2.91  | TRUE  |
| Colon | 1  | 159888888 | 159896553 | ENST00000397334.2 | TAGLN2      | 0.63 | 0.45 | 0.18 | 0.09 | 0.10 | 2.80  | TRUE  |
| Colon | 1  | 149819766 | 149826428 | ENST00000403683.1 | HIST2H3A    | 0.28 | 0.14 | 0.14 | 0.07 | 0.08 | 2.76  | TRUE  |

|       |    |           |           |                   |            |      |      |      |      |      |       |       |
|-------|----|-----------|-----------|-------------------|------------|------|------|------|------|------|-------|-------|
| Colon | 7  | 27202748  | 27210249  | ENST00000489695.1 | HOXA9      | 0.95 | 0.85 | 0.10 | 0.19 | 0.23 | 2.73  | TRUE  |
| Colon | 7  | 27210777  | 27221249  | ENST00000396344.4 | HOXA10     | 0.76 | 0.45 | 0.30 | 0.26 | 0.29 | 2.60  | TRUE  |
| Colon | 19 | 13948788  | 13956320  | ENST00000591727.1 | NANOS3     | 0.69 | 0.55 | 0.15 | 0.24 | 0.29 | 2.55  | TRUE  |
| Colon | 7  | 104643451 | 104656449 | ENST00000474203.1 | MLL5       | 0.62 | 0.51 | 0.12 | 0.06 | 0.07 | 2.40  | TRUE  |
| Colon | 1  | 150531037 | 150543263 | ENST00000369035.2 | C1orf138   | 0.51 | 0.37 | 0.14 | 0.15 | 0.16 | 2.35  | TRUE  |
| Colon | 1  | 19966426  | 19978402  | ENST00000427894.1 | NBL1       | 0.54 | 0.25 | 0.28 | 0.15 | 0.17 | 2.18  | TRUE  |
| Colon | 5  | 180668526 | 180674519 | ENST00000514318.1 | GNB2L1     | 0.82 | 0.70 | 0.13 | 0.07 | 0.08 | 2.01  | TRUE  |
| Colon | 17 | 57904024  | 57931778  | ENST00000587470.1 | VMP1       | 0.49 | 0.14 | 0.35 | 0.25 | 0.33 | 1.96  | TRUE  |
| Colon | 11 | 118659296 | 118664159 | ENST00000533239.1 | DDX6       | 1.00 | 0.86 | 0.14 | 0.05 | 0.06 | 1.96  | TRUE  |
| Colon | 12 | 7051408   | 7057319   | ENST00000538318.1 | PTPN6      | 0.59 | 0.40 | 0.18 | 0.14 | 0.14 | 1.93  | TRUE  |
| Colon | 20 | 52195018  | 52241000  | ENST00000540425.1 | ZNF217     | 0.41 | 0.24 | 0.17 | 0.22 | 0.23 | 1.74  | TRUE  |
| Colon | 6  | 32934747  | 32951807  | ENST00000482838.1 | BRD2       | 0.61 | 0.51 | 0.10 | 0.05 | 0.06 | 1.58  | TRUE  |
| Colon | 17 | 7161661   | 7168259   | ENST00000573745.1 | CLDN7      | 0.63 | 0.45 | 0.18 | 0.12 | 0.13 | 1.40  | TRUE  |
| Colon | 15 | 86121044  | 86133400  | ENST00000560340.1 | AKAP13     | 0.40 | 0.18 | 0.22 | 0.20 | 0.26 | 1.38  | TRUE  |
| Colon | 2  | 201980044 | 201998492 | ENST00000460961.1 | CFLAR      | 0.57 | 0.44 | 0.13 | 0.12 | 0.13 | 1.25  | FALSE |
| Colon | 2  | 174828021 | 174831622 | ENST00000490182.1 | SP3        | 1.00 | 0.88 | 0.12 | 0.07 | 0.07 | 1.19  | FALSE |
| Colon | 17 | 4033794   | 4049258   | ENST00000573984.1 | CYB5D2     | 0.27 | 0.16 | 0.11 | 0.07 | 0.07 | 1.17  | FALSE |
| Colon | 20 | 43968274  | 43977802  | ENST00000537976.1 | SDC4       | 0.77 | 0.29 | 0.48 | 0.18 | 0.19 | 1.08  | FALSE |
| Colon | 2  | 173291273 | 173330716 | ENST00000409080.1 | ITGA6      | 0.25 | 0.10 | 0.15 | 0.17 | 0.18 | 0.90  | FALSE |
| Colon | 3  | 9436663   | 9444883   | ENST00000406341.1 | SETD5      | 0.78 | 0.65 | 0.13 | 0.09 | 0.10 | 0.86  | FALSE |
| Colon | 5  | 96268784  | 96273156  | ENST00000231368.5 | LNPEP      | 0.95 | 0.81 | 0.13 | 0.03 | 0.03 | 0.76  | FALSE |
| Colon | 8  | 103816742 | 103826153 | ENST00000518697.1 | AZIN1      | 0.54 | 0.43 | 0.12 | 0.11 | 0.11 | 0.75  | FALSE |
| Colon | 8  | 126438172 | 126449618 | ENST00000519576.1 | TRIB1      | 0.52 | 0.36 | 0.16 | 0.06 | 0.05 | 0.64  | FALSE |
| Colon | 17 | 38213719  | 38232994  | ENST00000577486.1 | THRA       | 0.55 | 0.44 | 0.11 | 0.15 | 0.16 | 0.64  | FALSE |
| Colon | 18 | 3446352   | 3459783   | ENST00000472042.1 | TGIF1      | 0.77 | 0.55 | 0.22 | 0.09 | 0.09 | 0.62  | FALSE |
| Colon | 1  | 1675407   | 1679081   | ENST00000246421.4 | SLC35E2    | 0.74 | 0.62 | 0.12 | 0.03 | 0.04 | 0.54  | FALSE |
| Colon | 3  | 193848397 | 193860794 | ENST00000476918.1 | HES1       | 0.80 | 0.61 | 0.19 | 0.08 | 0.08 | 0.47  | FALSE |
| Colon | 2  | 200306225 | 200342782 | ENST00000463386.1 | SATB2      | 0.56 | 0.40 | 0.16 | 0.16 | 0.17 | 0.46  | FALSE |
| Colon | 17 | 7459695   | 7466311   | ENST00000429205.2 | SENP3      | 0.74 | 0.63 | 0.11 | 0.20 | 0.19 | 0.26  | FALSE |
| Colon | 1  | 169069278 | 169085972 | ENST00000367813.3 | ATP1B1     | 0.45 | 0.34 | 0.11 | 0.13 | 0.12 | 0.19  | FALSE |
| Colon | 12 | 6559071   | 6563067   | ENST00000543567.1 | TAPBPL     | 0.75 | 0.64 | 0.11 | 0.06 | 0.05 | -0.04 | FALSE |
| Colon | 12 | 56472347  | 56482109  | ENST00000546748.1 | ERBB3      | 0.44 | 0.27 | 0.17 | 0.15 | 0.14 | -0.05 | FALSE |
| Colon | 11 | 307666    | 312937    | ENST00000399815.2 | IFITM2     | 0.70 | 0.55 | 0.14 | 0.16 | 0.16 | -0.08 | FALSE |
| Colon | 3  | 50373024  | 50380264  | ENST00000490675.1 | ZMYND10    | 0.49 | 0.39 | 0.10 | 0.16 | 0.14 | -0.13 | FALSE |
| Colon | 13 | 28526778  | 28556061  | ENST00000548877.1 | CDX2       | 0.94 | 0.72 | 0.23 | 0.23 | 0.23 | -0.27 | FALSE |
| Colon | 2  | 151323963 | 151344439 | ENST00000454202.1 | RND3       | 0.28 | 0.17 | 0.11 | 0.12 | 0.11 | -0.59 | FALSE |
| Colon | 4  | 38662929  | 38689928  | ENST00000436901.1 | AC021860.1 | 0.45 | 0.29 | 0.16 | 0.14 | 0.13 | -0.59 | FALSE |
| Colon | 19 | 49463688  | 49472130  | ENST00000331825.6 | FTL        | 0.54 | 0.39 | 0.15 | 0.19 | 0.18 | -0.82 | FALSE |
| Colon | 5  | 179244886 | 179250297 | ENST00000360718.5 | SQSTM1     | 0.68 | 0.57 | 0.11 | 0.07 | 0.06 | -1.19 | FALSE |



|       |    |           |           |                   |          |      |      |      |      |      |       |       |
|-------|----|-----------|-----------|-------------------|----------|------|------|------|------|------|-------|-------|
| Colon | 11 | 71748625  | 71754435  | ENST00000535947.1 | NUMA1    | 0.81 | 0.67 | 0.13 | 0.14 | 0.12 | -1.54 | FALSE |
| Colon | 12 | 53762866  | 53777584  | ENST00000548560.1 | SP1      | 0.41 | 0.29 | 0.12 | 0.11 | 0.10 | -1.97 | FALSE |
| Colon | 11 | 64654606  | 64662582  | ENST00000457202.1 | EHD1     | 0.23 | 0.09 | 0.13 | 0.14 | 0.12 | -5.94 | FALSE |
| Lung  | 4  | 174427206 | 174460857 | ENST00000505300.1 | HAND2    | 0.74 | 0.60 | 0.14 | 0.24 | 0.31 | 9.72  | TRUE  |
| Lung  | 2  | 66659175  | 66674430  | ENST00000475239.1 | MEIS1    | 0.78 | 0.63 | 0.16 | 0.20 | 0.28 | 9.54  | TRUE  |
| Lung  | 1  | 2160113   | 2167961   | ENST00000508416.1 | SKI      | 0.66 | 0.55 | 0.12 | 0.17 | 0.26 | 5.43  | TRUE  |
| Lung  | 20 | 22536539  | 22565230  | ENST00000319993.4 | FOXA2    | 0.69 | 0.54 | 0.15 | 0.17 | 0.22 | 2.36  | TRUE  |
| Lung  | 16 | 56638742  | 56646907  | ENST00000567300.1 | MT2A     | 0.50 | 0.39 | 0.12 | 0.22 | 0.27 | 2.26  | TRUE  |
| Lung  | 12 | 6441703   | 6453465   | ENST00000538363.1 | TNFRSF1A | 0.61 | 0.45 | 0.16 | 0.05 | 0.08 | 1.37  | TRUE  |
| Lung  | 12 | 119613625 | 119628282 | ENST00000542496.1 | HSPB8    | 0.22 | 0.10 | 0.12 | 0.14 | 0.19 | 1.36  | TRUE  |
| Lung  | 11 | 305282    | 312843    | ENST00000399815.2 | IFITM2   | 0.50 | 0.40 | 0.10 | 0.16 | 0.17 | 1.10  | FALSE |
| Lung  | 1  | 154939647 | 154948901 | ENST00000473344.1 | CKS1B    | 0.61 | 0.48 | 0.12 | 0.15 | 0.17 | 0.69  | FALSE |
| Lung  | 22 | 46464333  | 46478321  | ENST00000443490.1 | MIRLET7  | 0.85 | 0.71 | 0.15 | 0.20 | 0.23 | 0.32  | FALSE |
| Lung  | 11 | 67803279  | 67809641  | ENST00000533947.1 | TCIRG1   | 0.45 | 0.34 | 0.11 | 0.10 | 0.12 | 0.29  | FALSE |
| Lung  | 17 | 7378645   | 7384073   | ENST00000380599.4 | ZBTB4    | 0.65 | 0.45 | 0.20 | 0.22 | 0.24 | 0.06  | FALSE |
| Lung  | 5  | 43033834  | 43045550  | ENST00000314890.3 | ANXA2R   | 0.57 | 0.43 | 0.14 | 0.20 | 0.21 | -0.09 | FALSE |
| Lung  | 19 | 45244285  | 45262369  | ENST00000473473.1 | BCL3     | 0.46 | 0.34 | 0.12 | 0.08 | 0.09 | -0.21 | FALSE |
| Lung  | 12 | 92526891  | 92540701  | ENST00000552315.1 | BTG1     | 0.71 | 0.57 | 0.14 | 0.12 | 0.11 | -0.21 | FALSE |
| Lung  | 14 | 105938037 | 105944737 | ENST00000548309.1 | CRIP2    | 0.80 | 0.66 | 0.14 | 0.16 | 0.17 | -0.32 | FALSE |
| Lung  | 1  | 145434374 | 145443479 | ENST00000486597.1 | TXNIP    | 0.71 | 0.57 | 0.15 | 0.10 | 0.10 | -0.61 | FALSE |
| Lung  | 19 | 13948720  | 13956318  | ENST00000591727.1 | NANOS3   | 0.66 | 0.55 | 0.11 | 0.27 | 0.28 | -1.91 | FALSE |
| Lung  | 9  | 35726029  | 35733751  | ENST00000486056.1 | CREB3    | 0.65 | 0.53 | 0.12 | 0.13 | 0.12 | -2.30 | FALSE |

**Supplementary Table 4:** Hypermethylated super-enhancers in cancer samples ( $\delta$  HMR > 25%).

| Cancer type                     | Super-Enhancer |           |           | HMR coverage (%) |        |          | Gene symbol |
|---------------------------------|----------------|-----------|-----------|------------------|--------|----------|-------------|
|                                 | Chr.           | Start     | End       | Normal           | Cancer | $\delta$ |             |
| Primary breast tumor (468PT)    | 7              | 27134577  | 27144793  | 0.95             | 0.22   | 0.73     | HOXA2       |
| Primary breast tumor (468PT)    | 5              | 1881509   | 1890183   | 0.97             | 0.29   | 0.67     | IRX4        |
| Primary breast tumor (468PT)    | 3              | 29321550  | 29334286  | 0.65             | 0.00   | 0.65     | RBMS3       |
| Primary breast tumor (468PT)    | 5              | 142773722 | 142785691 | 0.95             | 0.32   | 0.63     | NR3C1       |
| Primary breast tumor (468PT)    | 11             | 8828385   | 8837469   | 0.63             | 0.00   | 0.63     | ST5         |
| Primary breast tumor (468PT)    | 22             | 46467114  | 46488203  | 1.00             | 0.39   | 0.61     | MIRLET7     |
| Primary breast tumor (468PT)    | 5              | 2739262   | 2759651   | 0.92             | 0.31   | 0.60     | IRX2        |
| Primary breast tumor (468PT)    | 5              | 131593100 | 131603174 | 0.60             | 0.00   | 0.60     | PDLIM4      |
| Primary breast tumor (468PT)    | 22             | 46448058  | 46467049  | 1.00             | 0.50   | 0.50     | MIRLET7     |
| Primary breast tumor (468PT)    | 7              | 27175056  | 27185979  | 0.61             | 0.17   | 0.44     | HOXA5       |
| Primary breast tumor (468PT)    | 21             | 36252652  | 36264673  | 0.93             | 0.50   | 0.42     | RUNX1       |
| Primary breast tumor (468PT)    | 1              | 45270631  | 45276266  | 0.65             | 0.25   | 0.41     | BTBD19      |
| Primary breast tumor (468PT)    | 1              | 33792562  | 33815439  | 0.49             | 0.10   | 0.39     | PHC2        |
| Primary breast tumor (468PT)    | 10             | 122913683 | 122920721 | 0.38             | 0.00   | 0.38     | WDR11       |
| Primary breast tumor (468PT)    | 20             | 51581498  | 51597746  | 0.45             | 0.08   | 0.37     | TSHZ2       |
| Primary breast tumor (468PT)    | 14             | 74207241  | 74227902  | 0.58             | 0.22   | 0.36     | MIR4505     |
| Primary breast tumor (468PT)    | 12             | 92527863  | 92539838  | 0.63             | 0.28   | 0.35     | BTG1        |
| Primary breast tumor (468PT)    | 1              | 154941228 | 154949531 | 0.82             | 0.49   | 0.34     | MIR4258     |
| Primary breast tumor (468PT)    | 7              | 41734099  | 41745805  | 0.40             | 0.07   | 0.34     | INHBA       |
| Primary breast tumor (468PT)    | 11             | 6339234   | 6344196   | 0.61             | 0.28   | 0.32     | PRKCDBP     |
| Primary breast tumor (468PT)    | 1              | 144706472 | 144710218 | 0.32             | 0.00   | 0.32     | PDE4DIP     |
| Primary breast tumor (468PT)    | 1              | 27830256  | 27900464  | 0.37             | 0.05   | 0.32     | WASF2       |
| Primary breast tumor (468PT)    | 15             | 93425946  | 93432559  | 0.87             | 0.56   | 0.31     | CHD2        |
| Primary breast tumor (468PT)    | 20             | 34326330  | 34331841  | 0.91             | 0.61   | 0.30     | RBM39       |
| Primary breast tumor (468PT)    | 15             | 50644604  | 50649357  | 0.96             | 0.66   | 0.29     | GABPB1      |
| Primary breast tumor (468PT)    | 12             | 6432600   | 6452223   | 0.50             | 0.21   | 0.29     | TNFRSF1A    |
| Primary breast tumor (468PT)    | 3              | 71104592  | 71120542  | 0.41             | 0.12   | 0.28     | FOXP1       |
| Primary breast tumor (468PT)    | 1              | 157964217 | 157991843 | 0.50             | 0.22   | 0.28     | KIRREL      |
| Primary breast tumor (468PT)    | 1              | 144981791 | 144985538 | 0.28             | 0.00   | 0.28     | PDE4DIP     |
| Primary breast tumor (468PT)    | 14             | 69402525  | 69445588  | 0.35             | 0.08   | 0.28     | ACTN1       |
| Primary breast tumor (468PT)    | 19             | 42771661  | 42788152  | 0.57             | 0.30   | 0.27     | ERF         |
| Primary breast tumor (468PT)    | 7              | 74264047  | 74268456  | 0.26             | 0.00   | 0.26     | GTF2IRD2    |
| Primary breast tumor (468PT)    | 10             | 126406768 | 126435377 | 0.34             | 0.08   | 0.26     | FAM53B      |
| Breast tumor metastasis (468LN) | 5              | 2739262   | 2759651   | 0.92             | 0.13   | 0.79     | IRX2        |

|                                 |    |           |           |      |      |      |         |
|---------------------------------|----|-----------|-----------|------|------|------|---------|
| Breast tumor metastasis (468LN) | 5  | 1881509   | 1890183   | 0.97 | 0.21 | 0.76 | IRX4    |
| Breast tumor metastasis (468LN) | 7  | 27134577  | 27144793  | 0.95 | 0.21 | 0.74 | HOXA2   |
| Breast tumor metastasis (468LN) | 1  | 45270631  | 45276266  | 0.65 | 0.00 | 0.65 | BTBD19  |
| Breast tumor metastasis (468LN) | 5  | 131593100 | 131603174 | 0.60 | 0.00 | 0.60 | PDLIM4  |
| Breast tumor metastasis (468LN) | 2  | 239193425 | 239200323 | 0.73 | 0.15 | 0.59 | PER2    |
| Breast tumor metastasis (468LN) | 12 | 6479020   | 6487672   | 0.57 | 0.00 | 0.57 | LTBR    |
| Breast tumor metastasis (468LN) | 9  | 33157786  | 33167403  | 0.92 | 0.36 | 0.56 | B4GALT1 |
| Breast tumor metastasis (468LN) | 18 | 3622231   | 3626476   | 0.52 | 0.00 | 0.52 | DLGAP1  |
| Breast tumor metastasis (468LN) | 16 | 54959639  | 54972666  | 0.93 | 0.43 | 0.51 | IRX5    |
| Breast tumor metastasis (468LN) | 7  | 27175056  | 27185979  | 0.61 | 0.11 | 0.49 | HOXA5   |
| Breast tumor metastasis (468LN) | 7  | 5457613   | 5470399   | 0.98 | 0.49 | 0.49 | TNRC18  |
| Breast tumor metastasis (468LN) | 4  | 146653244 | 146658422 | 0.68 | 0.21 | 0.47 | MMAA    |
| Breast tumor metastasis (468LN) | 3  | 193849125 | 193860857 | 0.79 | 0.34 | 0.46 | HES1    |
| Breast tumor metastasis (468LN) | 12 | 10868156  | 10877012  | 0.79 | 0.35 | 0.44 | CSDA    |
| Breast tumor metastasis (468LN) | 1  | 153579895 | 153590703 | 0.49 | 0.06 | 0.43 | S100A14 |
| Breast tumor metastasis (468LN) | 1  | 59245181  | 59252471  | 0.86 | 0.44 | 0.43 | JUN     |
| Breast tumor metastasis (468LN) | 11 | 62306073  | 62328249  | 0.61 | 0.20 | 0.42 | AHNAK   |
| Breast tumor metastasis (468LN) | 3  | 71104592  | 71120542  | 0.41 | 0.00 | 0.41 | FOXP1   |
| Breast tumor metastasis (468LN) | 10 | 122913683 | 122920721 | 0.38 | 0.00 | 0.38 | WDR11   |
| Breast tumor metastasis (468LN) | 6  | 121756401 | 121769000 | 0.38 | 0.00 | 0.38 | GJA1    |
| Breast tumor metastasis (468LN) | 4  | 128702346 | 128706700 | 0.55 | 0.17 | 0.38 | HSPA4L  |
| Breast tumor metastasis (468LN) | 20 | 10634437  | 10656669  | 0.49 | 0.11 | 0.37 | JAG1    |
| Breast tumor metastasis (468LN) | 6  | 35692791  | 35701120  | 0.55 | 0.18 | 0.37 | FKBP5   |
| Breast tumor metastasis (468LN) | 22 | 46448058  | 46467049  | 1.00 | 0.63 | 0.37 | MIRLET7 |
| Breast tumor metastasis (468LN) | 11 | 8828385   | 8837469   | 0.63 | 0.26 | 0.37 | ST5     |
| Breast tumor metastasis (468LN) | 3  | 29321550  | 29334286  | 0.65 | 0.29 | 0.36 | RBMS3   |
| Breast tumor metastasis (468LN) | 19 | 13123147  | 13172690  | 0.50 | 0.14 | 0.36 | TRMT1   |
| Breast tumor metastasis (468LN) | 14 | 77489392  | 77513614  | 0.67 | 0.31 | 0.35 | C14orf4 |
| Breast tumor metastasis (468LN) | 1  | 27830256  | 27900464  | 0.37 | 0.02 | 0.35 | WASF2   |
| Breast tumor metastasis (468LN) | 12 | 115105999 | 115123428 | 0.60 | 0.24 | 0.35 | TBX3    |
| Breast tumor metastasis (468LN) | 11 | 66821179  | 66830989  | 0.33 | 0.00 | 0.33 | RHOD    |
| Breast tumor metastasis (468LN) | 11 | 65238595  | 65276583  | 0.63 | 0.31 | 0.32 | MALAT1  |
| Breast tumor metastasis (468LN) | 1  | 144706472 | 144710218 | 0.32 | 0.00 | 0.32 | PDE4DIP |
| Breast tumor metastasis (468LN) | 15 | 93425946  | 93432559  | 0.87 | 0.56 | 0.31 | CHD2    |
| Breast tumor metastasis (468LN) | 7  | 55085115  | 55095372  | 0.50 | 0.19 | 0.31 | EGFR    |
| Breast tumor metastasis (468LN) | 1  | 37936765  | 37953189  | 0.42 | 0.11 | 0.31 | ZC3H12A |
| Breast tumor metastasis (468LN) | 4  | 77506454  | 77513253  | 0.31 | 0.00 | 0.31 | STBD1   |
| Breast tumor metastasis (468LN) | 7  | 41734099  | 41745805  | 0.40 | 0.10 | 0.31 | INHBA   |
| Breast tumor metastasis (468LN) | 8  | 145008274 | 145031982 | 0.62 | 0.32 | 0.30 | PLEC1   |

|                                     |    |           |           |      |      |      |          |
|-------------------------------------|----|-----------|-----------|------|------|------|----------|
| Breast tumor metastasis (468LN)     | 17 | 75274996  | 75288850  | 0.30 | 0.01 | 0.29 | SEPT9    |
| Breast tumor metastasis (468LN)     | 6  | 10398835  | 10421638  | 0.81 | 0.52 | 0.29 | TFAP2A   |
| Breast tumor metastasis (468LN)     | 12 | 6432600   | 6452223   | 0.50 | 0.21 | 0.29 | TNFRSF1A |
| Breast tumor metastasis (468LN)     | 1  | 144981791 | 144985538 | 0.28 | 0.00 | 0.28 | PDE4DIP  |
| Breast tumor metastasis (468LN)     | 10 | 74051120  | 74097380  | 0.27 | 0.00 | 0.27 | DDIT4    |
| Breast tumor metastasis (468LN)     | 22 | 36718824  | 36814131  | 0.34 | 0.07 | 0.27 | MYH9     |
| Breast tumor metastasis (468LN)     | 8  | 116659885 | 116682409 | 0.42 | 0.15 | 0.27 | TRPS1    |
| Breast tumor metastasis (468LN)     | 6  | 30843042  | 30858880  | 0.32 | 0.05 | 0.27 | DDR1     |
| Breast tumor metastasis (468LN)     | 5  | 95291493  | 95300367  | 0.41 | 0.14 | 0.27 | ELL2     |
| Breast tumor metastasis (468LN)     | 5  | 121515651 | 121520476 | 0.26 | 0.00 | 0.26 | ZNF474   |
| Breast tumor metastasis (468LN)     | 3  | 187453456 | 187468930 | 0.81 | 0.56 | 0.26 | BCL6     |
| Breast tumor metastasis (468LN)     | 2  | 36579464  | 36605312  | 0.55 | 0.29 | 0.26 | CRIM1    |
| Breast tumor metastasis (468LN)     | 12 | 46653450  | 46664706  | 0.32 | 0.07 | 0.25 | SLC38A1  |
| Breast tumor metastasis (468LN)     | 19 | 12888234  | 12905680  | 0.68 | 0.43 | 0.25 | JUNB     |
| Lung adenocarcinoma (H1437)         | 5  | 2738590   | 2759482   | 0.83 | 0.10 | 0.74 | IRX2     |
| Lung adenocarcinoma (H1437)         | 5  | 172655376 | 172676296 | 0.74 | 0.17 | 0.58 | NKX2-5   |
| Lung adenocarcinoma (H1437)         | 3  | 128199015 | 128216666 | 0.79 | 0.25 | 0.53 | GATA2    |
| Lung adenocarcinoma (H1437)         | 4  | 174427206 | 174460857 | 0.74 | 0.25 | 0.48 | HAND2    |
| Lung adenocarcinoma (H1437)         | 1  | 145434374 | 145443479 | 0.71 | 0.24 | 0.48 | TXNIP    |
| Lung adenocarcinoma (H1437)         | 2  | 66659175  | 66674430  | 0.78 | 0.33 | 0.45 | MEIS1    |
| Lung adenocarcinoma (H1437)         | 19 | 13122379  | 13134630  | 0.43 | 0.04 | 0.39 | NFIX     |
| Lung adenocarcinoma (H1437)         | 1  | 145448015 | 145457936 | 0.37 | 0.00 | 0.37 | TXNIP    |
| Lung adenocarcinoma (H1437)         | 17 | 7378645   | 7384073   | 0.65 | 0.29 | 0.36 | ZBTB4    |
| Lung adenocarcinoma (H1437)         | 14 | 105938037 | 105944737 | 0.80 | 0.46 | 0.34 | CRIP2    |
| Lung adenocarcinoma (H1437)         | 9  | 35726029  | 35733751  | 0.65 | 0.34 | 0.31 | CREB3    |
| Lung adenocarcinoma (H1437)         | 22 | 46445515  | 46454339  | 0.63 | 0.34 | 0.29 | MIRLET7  |
| Lung adenocarcinoma (H1437)         | 22 | 46464333  | 46478321  | 0.85 | 0.58 | 0.27 | MIRLET7  |
| Lung adenocarcinoma (H1437)         | 10 | 77154286  | 77170840  | 0.72 | 0.45 | 0.26 | ZNF503   |
| Lung squamous cell carcinoma (H157) | 4  | 174427206 | 174460857 | 0.74 | 0.07 | 0.67 | HAND2    |
| Lung squamous cell carcinoma (H157) | 5  | 2738590   | 2759482   | 0.83 | 0.20 | 0.63 | IRX2     |
| Lung squamous cell carcinoma (H157) | 3  | 128199015 | 128216666 | 0.79 | 0.16 | 0.63 | GATA2    |
| Lung squamous cell carcinoma (H157) | 2  | 8815972   | 8826211   | 0.96 | 0.37 | 0.59 | ID2      |
| Lung squamous cell carcinoma (H157) | 2  | 66659175  | 66674430  | 0.78 | 0.26 | 0.52 | MEIS1    |
| Lung squamous cell carcinoma (H157) | 14 | 36971679  | 36995027  | 1.00 | 0.51 | 0.49 | SFTA3    |
| Lung squamous cell carcinoma (H157) | 1  | 145434374 | 145443479 | 0.71 | 0.23 | 0.48 | TXNIP    |
| Lung squamous cell carcinoma (H157) | 12 | 92526891  | 92540701  | 0.71 | 0.27 | 0.43 | BTG1     |
| Lung squamous cell carcinoma (H157) | 19 | 13122379  | 13134630  | 0.43 | 0.00 | 0.43 | NFIX     |
| Lung squamous cell carcinoma (H157) | 12 | 6441703   | 6453465   | 0.61 | 0.23 | 0.39 | TNFRSF1A |
| Lung squamous cell carcinoma (H157) | 11 | 118659939 | 118664216 | 0.92 | 0.54 | 0.38 | DDX6     |

|                                     |    |           |           |      |      |      |          |
|-------------------------------------|----|-----------|-----------|------|------|------|----------|
| Lung squamous cell carcinoma (H157) | 10 | 77154286  | 77170840  | 0.72 | 0.33 | 0.38 | ZNF503   |
| Lung squamous cell carcinoma (H157) | 17 | 7378645   | 7384073   | 0.65 | 0.28 | 0.37 | ZBTB4    |
| Lung squamous cell carcinoma (H157) | 1  | 145448015 | 145457936 | 0.37 | 0.00 | 0.37 | TXNIP    |
| Lung squamous cell carcinoma (H157) | 12 | 115105978 | 115131359 | 0.52 | 0.15 | 0.36 | TBX3     |
| Lung squamous cell carcinoma (H157) | 2  | 201724772 | 201732443 | 0.74 | 0.39 | 0.35 | Y_RNA    |
| Lung squamous cell carcinoma (H157) | 17 | 38222943  | 38234141  | 0.48 | 0.13 | 0.35 | THRA     |
| Lung squamous cell carcinoma (H157) | 12 | 7032586   | 7039696   | 0.64 | 0.30 | 0.34 | ATN1     |
| Lung squamous cell carcinoma (H157) | 9  | 35726029  | 35733751  | 0.65 | 0.33 | 0.32 | CREB3    |
| Lung squamous cell carcinoma (H157) | 22 | 46464333  | 46478321  | 0.85 | 0.53 | 0.32 | MIRLET7  |
| Lung squamous cell carcinoma (H157) | 16 | 54956715  | 54973307  | 0.73 | 0.41 | 0.32 | IRX5     |
| Lung squamous cell carcinoma (H157) | 14 | 105938037 | 105944737 | 0.80 | 0.48 | 0.32 | CRIP2    |
| Lung squamous cell carcinoma (H157) | 17 | 7459853   | 7466333   | 0.71 | 0.44 | 0.26 | SENP3    |
| Lung squamous cell carcinoma (H157) | 22 | 46445515  | 46454339  | 0.63 | 0.37 | 0.26 | MIRLET7  |
| Lung squamous cell carcinoma (H157) | 5  | 42990572  | 43020949  | 0.39 | 0.13 | 0.26 | ANXA2R   |
| Lung squamous cell carcinoma (H157) | 3  | 48504418  | 48515502  | 0.26 | 0.00 | 0.26 | SHISA5   |
| Small cell lung cancer (H1672)      | 11 | 65182856  | 65196355  | 0.89 | 0.13 | 0.76 | NEAT1    |
| Small cell lung cancer (H1672)      | 14 | 36971679  | 36995027  | 1.00 | 0.31 | 0.69 | SFTA3    |
| Small cell lung cancer (H1672)      | 12 | 6441703   | 6453465   | 0.61 | 0.00 | 0.61 | TNFRSF1A |
| Small cell lung cancer (H1672)      | 19 | 13948720  | 13956318  | 0.66 | 0.13 | 0.52 | MIR23    |
| Small cell lung cancer (H1672)      | 20 | 22536539  | 22565230  | 0.69 | 0.17 | 0.51 | FOXA2    |
| Small cell lung cancer (H1672)      | 4  | 174427206 | 174460857 | 0.74 | 0.23 | 0.50 | HAND2    |
| Small cell lung cancer (H1672)      | 3  | 128199015 | 128216666 | 0.79 | 0.29 | 0.50 | GATA2    |
| Small cell lung cancer (H1672)      | 17 | 38222943  | 38234141  | 0.48 | 0.00 | 0.48 | THRA     |
| Small cell lung cancer (H1672)      | 22 | 46464333  | 46478321  | 0.85 | 0.38 | 0.47 | MIRLET7  |
| Small cell lung cancer (H1672)      | 14 | 105938037 | 105944737 | 0.80 | 0.33 | 0.47 | CRIP2    |
| Small cell lung cancer (H1672)      | 11 | 118777304 | 118801687 | 0.71 | 0.25 | 0.46 | UPK2     |
| Small cell lung cancer (H1672)      | 2  | 66659175  | 66674430  | 0.78 | 0.33 | 0.45 | MEIS1    |
| Small cell lung cancer (H1672)      | 22 | 46445515  | 46454339  | 0.63 | 0.19 | 0.45 | MIRLET7  |
| Small cell lung cancer (H1672)      | 12 | 114806250 | 114852976 | 0.45 | 0.02 | 0.43 | TBX5     |
| Small cell lung cancer (H1672)      | 16 | 54956715  | 54973307  | 0.73 | 0.33 | 0.40 | IRX5     |
| Small cell lung cancer (H1672)      | 6  | 30646634  | 30659820  | 0.63 | 0.23 | 0.39 | NRM      |
| Small cell lung cancer (H1672)      | 12 | 92526891  | 92540701  | 0.71 | 0.33 | 0.38 | BTG1     |
| Small cell lung cancer (H1672)      | 11 | 67803279  | 67809641  | 0.45 | 0.09 | 0.37 | TCIRG1   |
| Small cell lung cancer (H1672)      | 1  | 145448015 | 145457936 | 0.37 | 0.00 | 0.37 | TXNIP    |
| Small cell lung cancer (H1672)      | 9  | 35726029  | 35733751  | 0.65 | 0.29 | 0.36 | CREB3    |
| Small cell lung cancer (H1672)      | 17 | 7378645   | 7384073   | 0.65 | 0.29 | 0.36 | ZBTB4    |
| Small cell lung cancer (H1672)      | 17 | 79475627  | 79487805  | 0.63 | 0.28 | 0.36 | ACTG1    |
| Small cell lung cancer (H1672)      | 5  | 2738590   | 2759482   | 0.83 | 0.48 | 0.35 | IRX2     |
| Small cell lung cancer (H1672)      | 11 | 118659939 | 118664216 | 0.92 | 0.57 | 0.35 | DDX6     |

|                                    |    |           |           |      |      |      |          |
|------------------------------------|----|-----------|-----------|------|------|------|----------|
| Small cell lung cancer (H1672)     | 2  | 201724772 | 201732443 | 0.74 | 0.40 | 0.35 | Y_RNA    |
| Small cell lung cancer (H1672)     | 19 | 1256391   | 1263727   | 0.50 | 0.16 | 0.34 | CIRBP    |
| Small cell lung cancer (H1672)     | 19 | 13122379  | 13134630  | 0.43 | 0.10 | 0.34 | NFIX     |
| Small cell lung cancer (H1672)     | 1  | 153537691 | 153541885 | 0.41 | 0.10 | 0.32 | S100A2   |
| Small cell lung cancer (H1672)     | 1  | 1364851   | 1372426   | 0.46 | 0.14 | 0.32 | VWA1     |
| Small cell lung cancer (H1672)     | 18 | 3591992   | 3606653   | 0.46 | 0.15 | 0.31 | DLGAP1   |
| Small cell lung cancer (H1672)     | 22 | 38708087  | 38715695  | 0.57 | 0.27 | 0.31 | CSNK1E   |
| Small cell lung cancer (H1672)     | 6  | 31694582  | 31706840  | 0.45 | 0.14 | 0.30 | CLIC1    |
| Small cell lung cancer (H1672)     | 19 | 1247145   | 1256325   | 0.68 | 0.38 | 0.30 | MIDN     |
| Small cell lung cancer (H1672)     | 19 | 41219787  | 41228823  | 0.64 | 0.35 | 0.29 | ITPKC    |
| Small cell lung cancer (H1672)     | 10 | 77154286  | 77170840  | 0.72 | 0.43 | 0.29 | ZNF503   |
| Small cell lung cancer (H1672)     | 1  | 145434374 | 145443479 | 0.71 | 0.42 | 0.29 | TXNIP    |
| Small cell lung cancer (H1672)     | 7  | 1569896   | 1580027   | 0.40 | 0.11 | 0.28 | MAFK     |
| Small cell lung cancer (H1672)     | 9  | 14302438  | 14323420  | 0.55 | 0.27 | 0.28 | NFIB     |
| Small cell lung cancer (H1672)     | 12 | 115105978 | 115131359 | 0.52 | 0.24 | 0.28 | TBX3     |
| Small cell lung cancer (H1672)     | 10 | 88726022  | 88733482  | 0.37 | 0.10 | 0.27 | AGAP11   |
| Small cell lung cancer (H1672)     | 5  | 172655376 | 172676296 | 0.74 | 0.48 | 0.26 | NKX2-5   |
| Small cell lung cancer (H1672)     | 16 | 56638742  | 56646907  | 0.50 | 0.25 | 0.25 | MT2A     |
| Small cell lung cancer (H1672)     | 9  | 14340900  | 14353877  | 0.32 | 0.06 | 0.25 | NFIB     |
| Primary colon tumor (Colon_P)      | 17 | 46631233  | 46657163  | 0.43 | 0.09 | 0.34 | HOXB3    |
| Primary colon tumor (Colon_P)      | 7  | 27178057  | 27189568  | 0.69 | 0.39 | 0.30 | HOXA6    |
| Primary colon tumor (Colon_P)      | 5  | 134361067 | 134376085 | 0.64 | 0.36 | 0.29 | PITX1    |
| Primary colon metastasis (Colon_M) | 7  | 27178057  | 27189568  | 0.69 | 0.36 | 0.33 | HOXA6    |
| Primary colon metastasis (Colon_M) | 17 | 46631233  | 46657163  | 0.43 | 0.11 | 0.32 | HOXB3    |
| Primary colon metastasis (Colon_M) | 5  | 134361067 | 134376085 | 0.64 | 0.36 | 0.28 | PITX1    |
| Primary colon metastasis (Colon_M) | 15 | 75072089  | 75083506  | 0.80 | 0.53 | 0.27 | CSK      |
| Glioblastoma (U87MG)               | 1  | 161160323 | 161173936 | 0.80 | 0.07 | 0.73 | NDUFS2   |
| Glioblastoma (U87MG)               | 6  | 163815822 | 163882069 | 0.79 | 0.14 | 0.65 | QKI      |
| Glioblastoma (U87MG)               | 7  | 29516606  | 29530680  | 0.63 | 0.00 | 0.63 | CHN2     |
| Glioblastoma (U87MG)               | 13 | 78291692  | 78329377  | 0.59 | 0.00 | 0.59 | SLAIN1   |
| Glioblastoma (U87MG)               | 9  | 130697475 | 130743184 | 0.61 | 0.07 | 0.55 | FAM102A  |
| Glioblastoma (U87MG)               | 18 | 74684916  | 74780601  | 0.53 | 0.00 | 0.53 | MBP      |
| Glioblastoma (U87MG)               | 17 | 79097124  | 79111085  | 0.59 | 0.09 | 0.50 | AATK     |
| Glioblastoma (U87MG)               | 9  | 131142171 | 131157912 | 0.49 | 0.00 | 0.49 | MIR219-2 |
| Glioblastoma (U87MG)               | 11 | 61520065  | 61534843  | 0.53 | 0.04 | 0.49 | MYRF     |
| Glioblastoma (U87MG)               | 10 | 14577374  | 14624047  | 0.46 | 0.00 | 0.46 | FAM107B  |
| Glioblastoma (U87MG)               | 3  | 33685210  | 33704614  | 0.45 | 0.00 | 0.45 | CLASP2   |
| Glioblastoma (U87MG)               | 13 | 67782754  | 67806323  | 0.59 | 0.14 | 0.45 | PCDH9    |
| Glioblastoma (U87MG)               | 22 | 38361166  | 38471689  | 0.39 | 0.01 | 0.39 | SOX10    |

|                      |    |           |           |      |      |      |               |
|----------------------|----|-----------|-----------|------|------|------|---------------|
| Glioblastoma (U87MG) | 17 | 36570707  | 36622668  | 0.54 | 0.16 | 0.39 | AC124789.1    |
| Glioblastoma (U87MG) | 6  | 134488737 | 134505092 | 0.60 | 0.22 | 0.38 | SGK1          |
| Glioblastoma (U87MG) | 11 | 67173218  | 67188540  | 0.45 | 0.06 | 0.38 | CARNS1        |
| Glioblastoma (U87MG) | 10 | 81137824  | 81212605  | 0.43 | 0.05 | 0.38 | ZCCHC24       |
| Glioblastoma (U87MG) | 8  | 26427962  | 26519962  | 0.45 | 0.08 | 0.37 | DPYSL2        |
| Glioblastoma (U87MG) | 7  | 22212818  | 22261220  | 0.37 | 0.00 | 0.37 | RAPGEF5       |
| Glioblastoma (U87MG) | 3  | 181403893 | 181455295 | 0.84 | 0.47 | 0.36 | SOX2          |
| Glioblastoma (U87MG) | 17 | 38216903  | 38234316  | 0.63 | 0.27 | 0.36 | THRA          |
| Glioblastoma (U87MG) | 18 | 60417206  | 60470491  | 0.35 | 0.00 | 0.35 | PHLPP1        |
| Glioblastoma (U87MG) | 12 | 48167031  | 48182319  | 0.40 | 0.06 | 0.35 | AC004466.1    |
| Glioblastoma (U87MG) | 9  | 140081775 | 140094696 | 0.56 | 0.21 | 0.35 | TPRN          |
| Glioblastoma (U87MG) | 3  | 170135527 | 170167574 | 0.34 | 0.00 | 0.34 | CLDN11        |
| Glioblastoma (U87MG) | 3  | 72424289  | 72464834  | 0.34 | 0.00 | 0.34 | RYBP          |
| Glioblastoma (U87MG) | 2  | 145129528 | 145283099 | 0.39 | 0.05 | 0.34 | ZEB2-AS1      |
| Glioblastoma (U87MG) | 10 | 88421359  | 88444547  | 0.33 | 0.00 | 0.33 | LDB3          |
| Glioblastoma (U87MG) | 5  | 36599886  | 36615091  | 0.50 | 0.17 | 0.33 | SLC1A3        |
| Glioblastoma (U87MG) | 22 | 37940770  | 37968154  | 0.50 | 0.18 | 0.32 | CDC42EP1      |
| Glioblastoma (U87MG) | 2  | 127806748 | 127912517 | 0.36 | 0.04 | 0.32 | BIN1          |
| Glioblastoma (U87MG) | 4  | 154142334 | 154219000 | 0.38 | 0.06 | 0.32 | Y_RNA         |
| Glioblastoma (U87MG) | 6  | 163659272 | 163687676 | 0.36 | 0.04 | 0.32 | snoU13        |
| Glioblastoma (U87MG) | 19 | 13093539  | 13211813  | 0.47 | 0.16 | 0.31 | NFIX          |
| Glioblastoma (U87MG) | 1  | 202090299 | 202115217 | 0.39 | 0.08 | 0.31 | ARL8A         |
| Glioblastoma (U87MG) | 16 | 19841311  | 19898686  | 0.35 | 0.04 | 0.31 | GPRC5B        |
| Glioblastoma (U87MG) | 14 | 29226576  | 29255674  | 0.61 | 0.30 | 0.30 | RP11-96617.2  |
| Glioblastoma (U87MG) | 10 | 126400866 | 126432679 | 0.40 | 0.10 | 0.30 | FAM53B        |
| Glioblastoma (U87MG) | 17 | 17638844  | 17657613  | 0.30 | 0.00 | 0.30 | RAI1-AS1      |
| Glioblastoma (U87MG) | 15 | 64974641  | 64996542  | 0.36 | 0.06 | 0.30 | RP11-330L19.4 |
| Glioblastoma (U87MG) | 16 | 75266933  | 75302422  | 0.51 | 0.22 | 0.29 | BCAR1         |
| Glioblastoma (U87MG) | 2  | 232526039 | 232554844 | 0.34 | 0.05 | 0.29 | Metazoa_SRP   |
| Glioblastoma (U87MG) | 13 | 107142225 | 107162158 | 0.29 | 0.00 | 0.29 | EFNB2         |
| Glioblastoma (U87MG) | 17 | 68152783  | 68183190  | 0.38 | 0.09 | 0.29 | KCNJ2         |
| Glioblastoma (U87MG) | 10 | 102752997 | 102775915 | 0.44 | 0.16 | 0.28 | LZTS2         |
| Glioblastoma (U87MG) | 14 | 77765872  | 77789479  | 0.39 | 0.10 | 0.28 | GSTZ1         |
| Glioblastoma (U87MG) | 8  | 120648911 | 120687423 | 0.41 | 0.13 | 0.28 | ENPP2         |
| Glioblastoma (U87MG) | 18 | 13610336  | 13640017  | 0.53 | 0.25 | 0.28 | LDLRAD4       |
| Glioblastoma (U87MG) | 17 | 79345155  | 79376776  | 0.54 | 0.27 | 0.27 | MIR4740       |
| Glioblastoma (U87MG) | 4  | 115547254 | 115584118 | 0.27 | 0.00 | 0.27 | MIR577        |
| Glioblastoma (U87MG) | 16 | 15234031  | 15244187  | 0.27 | 0.00 | 0.27 | Y_RNA         |
| Glioblastoma (U87MG) | 5  | 132105879 | 132116081 | 0.43 | 0.16 | 0.27 | 8-Sep         |

|                      |    |           |           |      |      |      |               |
|----------------------|----|-----------|-----------|------|------|------|---------------|
| Glioblastoma (U87MG) | 10 | 650150    | 686281    | 0.31 | 0.04 | 0.26 | RP11-809C18.3 |
| Glioblastoma (U87MG) | 9  | 135976307 | 136024639 | 0.33 | 0.07 | 0.26 | RALGDS        |
| Glioblastoma (U87MG) | 11 | 111845328 | 111865086 | 0.33 | 0.07 | 0.25 | DIXDC1        |
| Glioblastoma (U87MG) | 10 | 22858862  | 22973344  | 0.25 | 0.00 | 0.25 | PIP4K2A       |
| Glioblastoma (U87MG) | 1  | 198871424 | 198907549 | 0.48 | 0.23 | 0.25 | RP11-31E23.1  |

---



**Supplementary Table 5:** Hypomethylated super-enhancers in cancer samples ( $\delta$  HMR > 25%).

| Tissue                       | Super-Enhancer |           |           | HMR coverage (%) |        |          | Gene symbol |
|------------------------------|----------------|-----------|-----------|------------------|--------|----------|-------------|
|                              | Chr.           | Start     | End       | Normal           | Cancer | $\delta$ |             |
| Primary breast tumor (468PT) | 2              | 91785127  | 91788546  | 0.00             | 1.00   | 1.00     | AC233263.1  |
| Primary breast tumor (468PT) | 7              | 107947705 | 107953802 | 0.00             | 1.00   | 1.00     | NRCAM       |
| Primary breast tumor (468PT) | 16             | 72320261  | 72327455  | 0.00             | 1.00   | 1.00     | PMFBP1      |
| Primary breast tumor (468PT) | 3              | 74578493  | 74588238  | 0.00             | 1.00   | 1.00     | CNTN3       |
| Primary breast tumor (468PT) | 10             | 118176539 | 118201896 | 0.00             | 0.99   | 0.99     | PNLIPRP3    |
| Primary breast tumor (468PT) | 11             | 131923942 | 131950946 | 0.00             | 0.98   | 0.98     | NTM         |
| Primary breast tumor (468PT) | 20             | 22354832  | 22372608  | 0.00             | 0.96   | 0.96     | FOXA2       |
| Primary breast tumor (468PT) | 20             | 22354832  | 22372608  | 0.00             | 0.96   | 0.96     | FOXA2       |
| Primary breast tumor (468PT) | 8              | 32082261  | 32138267  | 0.02             | 0.97   | 0.94     | NRG1        |
| Primary breast tumor (468PT) | 8              | 32082261  | 32138267  | 0.02             | 0.97   | 0.94     | NRG1        |
| Primary breast tumor (468PT) | 8              | 32082261  | 32138267  | 0.02             | 0.97   | 0.94     | NRG1        |
| Primary breast tumor (468PT) | 8              | 32082261  | 32138267  | 0.02             | 0.97   | 0.94     | NRG1        |
| Primary breast tumor (468PT) | 8              | 32082261  | 32138267  | 0.02             | 0.97   | 0.94     | NRG1        |
| Primary breast tumor (468PT) | 8              | 32082261  | 32138267  | 0.02             | 0.97   | 0.94     | NRG1        |
| Primary breast tumor (468PT) | 5              | 167229136 | 167249797 | 0.06             | 1.00   | 0.94     | TENM2       |
| Primary breast tumor (468PT) | 4              | 166884826 | 166896752 | 0.00             | 0.93   | 0.93     | TLL1        |
| Primary breast tumor (468PT) | 11             | 41071460  | 41077058  | 0.00             | 0.91   | 0.91     | LRRC4C      |
| Primary breast tumor (468PT) | 2              | 17760510  | 17781417  | 0.06             | 0.97   | 0.91     | VSNL1       |
| Primary breast tumor (468PT) | 21             | 28941125  | 28955796  | 0.00             | 0.90   | 0.90     | ADAMTS5     |
| Primary breast tumor (468PT) | 15             | 84511818  | 84524836  | 0.06             | 0.97   | 0.90     | ADAMTSL3    |
| Primary breast tumor (468PT) | 16             | 82659814  | 82694376  | 0.05             | 0.94   | 0.89     | CDH13       |
| Primary breast tumor (468PT) | 8              | 32160365  | 32202004  | 0.05             | 0.93   | 0.87     | NRG1        |
| Primary breast tumor (468PT) | 8              | 32160365  | 32202004  | 0.05             | 0.93   | 0.87     | NRG1        |
| Primary breast tumor (468PT) | 8              | 32160365  | 32202004  | 0.05             | 0.93   | 0.87     | NRG1        |
| Primary breast tumor (468PT) | 8              | 32160365  | 32202004  | 0.05             | 0.93   | 0.87     | NRG1        |
| Primary breast tumor (468PT) | 8              | 32160365  | 32202004  | 0.05             | 0.93   | 0.87     | NRG1        |
| Primary breast tumor (468PT) | 8              | 32160365  | 32202004  | 0.05             | 0.93   | 0.87     | NRG1        |
| Primary breast tumor (468PT) | 12             | 29884879  | 29936970  | 0.04             | 0.90   | 0.86     | TMTC1       |
| Primary breast tumor (468PT) | 3              | 74647878  | 74690393  | 0.05             | 0.91   | 0.86     | CNTN3       |
| Primary breast tumor (468PT) | 11             | 122026659 | 122068967 | 0.07             | 0.93   | 0.86     | BLID        |
| Primary breast tumor (468PT) | 12             | 19149492  | 19185438  | 0.00             | 0.85   | 0.85     | PLEKHA5     |
| Primary breast tumor (468PT) | 12             | 19149492  | 19185438  | 0.00             | 0.85   | 0.85     | PLEKHA5     |
| Primary breast tumor (468PT) | 12             | 19149492  | 19185438  | 0.00             | 0.85   | 0.85     | PLEKHA5     |
| Primary breast tumor (468PT) | 12             | 19149492  | 19185438  | 0.00             | 0.85   | 0.85     | PLEKHA5     |

|                                 |    |           |           |      |      |      |            |
|---------------------------------|----|-----------|-----------|------|------|------|------------|
| Primary breast tumor (468PT)    | 5  | 61211861  | 61217024  | 0.00 | 0.83 | 0.83 | C5orf64    |
| Primary breast tumor (468PT)    | 11 | 109930034 | 109968654 | 0.06 | 0.87 | 0.81 | ZC3H12C    |
| Primary breast tumor (468PT)    | 10 | 108182232 | 108202133 | 0.00 | 0.81 | 0.81 | SORCS1     |
| Primary breast tumor (468PT)    | 5  | 167124831 | 167172069 | 0.01 | 0.81 | 0.80 | TENM2      |
| Primary breast tumor (468PT)    | 12 | 18411546  | 18429687  | 0.00 | 0.80 | 0.80 | PIK3C2G    |
| Primary breast tumor (468PT)    | 4  | 177902138 | 177945974 | 0.00 | 0.76 | 0.76 | VEGFC      |
| Primary breast tumor (468PT)    | 3  | 115502074 | 115525187 | 0.08 | 0.84 | 0.75 | LSAMP      |
| Primary breast tumor (468PT)    | 8  | 49607646  | 49623337  | 0.07 | 0.82 | 0.74 | EFCAB1     |
| Primary breast tumor (468PT)    | 8  | 123139023 | 123153617 | 0.09 | 0.81 | 0.72 | HAS2       |
| Primary breast tumor (468PT)    | 7  | 55760378  | 55777116  | 0.00 | 0.68 | 0.68 | VOPP1      |
| Primary breast tumor (468PT)    | 8  | 32403683  | 32442699  | 0.19 | 0.86 | 0.66 | NRG1       |
| Primary breast tumor (468PT)    | 20 | 1789115   | 1811959   | 0.13 | 0.77 | 0.64 | SIRPA      |
| Primary breast tumor (468PT)    | 21 | 39831004  | 39862029  | 0.02 | 0.65 | 0.63 | ERG        |
| Primary breast tumor (468PT)    | 17 | 5729361   | 5740922   | 0.00 | 0.61 | 0.61 | WSCD1      |
| Primary breast tumor (468PT)    | 3  | 62571130  | 62594277  | 0.00 | 0.53 | 0.53 | CADPS      |
| Primary breast tumor (468PT)    | 5  | 1930374   | 1976494   | 0.12 | 0.63 | 0.50 | IRX4       |
| Primary breast tumor (468PT)    | 10 | 92593455  | 92620169  | 0.06 | 0.55 | 0.49 | HTR7       |
| Primary breast tumor (468PT)    | 11 | 114162169 | 114180527 | 0.26 | 0.75 | 0.49 | NNMT       |
| Primary breast tumor (468PT)    | 6  | 121756401 | 121769000 | 0.38 | 0.86 | 0.48 | GJA1       |
| Primary breast tumor (468PT)    | 1  | 162875345 | 162886688 | 0.00 | 0.45 | 0.45 | C1orf110   |
| Primary breast tumor (468PT)    | 1  | 162875345 | 162886688 | 0.00 | 0.45 | 0.45 | C1orf110   |
| Primary breast tumor (468PT)    | 5  | 149314305 | 149321676 | 0.00 | 0.38 | 0.38 | PDE6A      |
| Primary breast tumor (468PT)    | 5  | 149314305 | 149321676 | 0.00 | 0.38 | 0.38 | PDE6A      |
| Primary breast tumor (468PT)    | 3  | 193545523 | 193550492 | 0.00 | 0.37 | 0.37 | OPA1       |
| Primary breast tumor (468PT)    | 17 | 39674641  | 39706091  | 0.17 | 0.52 | 0.35 | KRT19      |
| Primary breast tumor (468PT)    | 2  | 143614960 | 143638844 | 0.02 | 0.35 | 0.34 | KYNU       |
| Primary breast tumor (468PT)    | 10 | 65310940  | 65315929  | 0.00 | 0.33 | 0.33 | REEP3      |
| Primary breast tumor (468PT)    | 10 | 65310940  | 65315929  | 0.00 | 0.33 | 0.33 | REEP3      |
| Primary breast tumor (468PT)    | 15 | 83945999  | 83992250  | 0.08 | 0.41 | 0.33 | BNC1       |
| Primary breast tumor (468PT)    | 17 | 57902558  | 57931624  | 0.25 | 0.56 | 0.31 | VMP1       |
| Primary breast tumor (468PT)    | 7  | 130643572 | 130647502 | 0.19 | 0.49 | 0.30 | MKLN1      |
| Primary breast tumor (468PT)    | 1  | 218648751 | 218673670 | 0.00 | 0.29 | 0.29 | C1orf143   |
| Primary breast tumor (468PT)    | 7  | 18547133  | 18551508  | 0.00 | 0.29 | 0.29 | HDAC9      |
| Primary breast tumor (468PT)    | 17 | 18621223  | 18626374  | 0.00 | 0.29 | 0.29 | TRIM16L    |
| Primary breast tumor (468PT)    | 11 | 15986587  | 15993130  | 0.00 | 0.29 | 0.29 | SOX6       |
| Primary breast tumor (468PT)    | 13 | 73629841  | 73641096  | 0.29 | 0.57 | 0.28 | KLF5       |
| Primary breast tumor (468PT)    | 1  | 8062975   | 8088860   | 0.25 | 0.51 | 0.27 | ERRFI1     |
| Primary breast tumor (468PT)    | 1  | 160982545 | 160992918 | 0.21 | 0.46 | 0.25 | F11R       |
| Breast tumor metastasis (468LN) | 2  | 91785127  | 91788546  | 0.00 | 1.00 | 1.00 | AC233263.1 |

|                                 |    |           |           |      |      |      |          |
|---------------------------------|----|-----------|-----------|------|------|------|----------|
| Breast tumor metastasis (468LN) | 2  | 213706261 | 213711784 | 0.00 | 1.00 | 1.00 | IKZF2    |
| Breast tumor metastasis (468LN) | 3  | 74578493  | 74588238  | 0.00 | 1.00 | 1.00 | CNTN3    |
| Breast tumor metastasis (468LN) | 20 | 22354832  | 22372608  | 0.00 | 1.00 | 1.00 | FOXA2    |
| Breast tumor metastasis (468LN) | 20 | 22354832  | 22372608  | 0.00 | 1.00 | 1.00 | FOXA2    |
| Breast tumor metastasis (468LN) | 4  | 166884826 | 166896752 | 0.00 | 1.00 | 1.00 | TLL1     |
| Breast tumor metastasis (468LN) | 17 | 5729361   | 5740922   | 0.00 | 0.99 | 0.99 | WSCD1    |
| Breast tumor metastasis (468LN) | 13 | 106796195 | 106810591 | 0.00 | 0.97 | 0.97 | EFNB2    |
| Breast tumor metastasis (468LN) | 4  | 74869808  | 74873810  | 0.00 | 0.96 | 0.96 | CXCL5    |
| Breast tumor metastasis (468LN) | 3  | 62571130  | 62594277  | 0.00 | 0.95 | 0.95 | CADPS    |
| Breast tumor metastasis (468LN) | 1  | 115150842 | 115162363 | 0.00 | 0.95 | 0.95 | DENND2C  |
| Breast tumor metastasis (468LN) | 5  | 66176502  | 66195546  | 0.00 | 0.94 | 0.94 | MAST4    |
| Breast tumor metastasis (468LN) | 5  | 167229136 | 167249797 | 0.06 | 1.00 | 0.94 | TENM2    |
| Breast tumor metastasis (468LN) | 5  | 167124831 | 167172069 | 0.01 | 0.93 | 0.93 | TENM2    |
| Breast tumor metastasis (468LN) | 11 | 41071460  | 41077058  | 0.00 | 0.91 | 0.91 | LRRC4C   |
| Breast tumor metastasis (468LN) | 16 | 82089108  | 82117271  | 0.00 | 0.91 | 0.91 | HSD17B2  |
| Breast tumor metastasis (468LN) | 11 | 93740640  | 93763165  | 0.05 | 0.96 | 0.90 | HEPHL1   |
| Breast tumor metastasis (468LN) | 3  | 74647878  | 74690393  | 0.05 | 0.93 | 0.88 | CNTN3    |
| Breast tumor metastasis (468LN) | 12 | 18411546  | 18429687  | 0.00 | 0.88 | 0.88 | PIK3C2G  |
| Breast tumor metastasis (468LN) | 15 | 84511818  | 84524836  | 0.06 | 0.94 | 0.88 | ADAMTSL3 |
| Breast tumor metastasis (468LN) | 12 | 52886804  | 52920914  | 0.07 | 0.95 | 0.88 | KRT5     |
| Breast tumor metastasis (468LN) | 19 | 46683563  | 46726215  | 0.07 | 0.94 | 0.86 | IGFL1    |
| Breast tumor metastasis (468LN) | 5  | 73526769  | 73548658  | 0.00 | 0.86 | 0.86 | ARHGEF28 |
| Breast tumor metastasis (468LN) | 12 | 19149492  | 19185438  | 0.00 | 0.85 | 0.85 | PLEKHA5  |
| Breast tumor metastasis (468LN) | 12 | 19149492  | 19185438  | 0.00 | 0.85 | 0.85 | PLEKHA5  |
| Breast tumor metastasis (468LN) | 12 | 19149492  | 19185438  | 0.00 | 0.85 | 0.85 | PLEKHA5  |
| Breast tumor metastasis (468LN) | 12 | 19149492  | 19185438  | 0.00 | 0.85 | 0.85 | PLEKHA5  |
| Breast tumor metastasis (468LN) | 11 | 119990825 | 120009715 | 0.09 | 0.94 | 0.85 | TRIM29   |
| Breast tumor metastasis (468LN) | 18 | 10411107  | 10423068  | 0.04 | 0.89 | 0.85 | APCDD1   |
| Breast tumor metastasis (468LN) | 18 | 38445567  | 38458816  | 0.00 | 0.84 | 0.84 | PIK3C3   |
| Breast tumor metastasis (468LN) | 5  | 169370816 | 169407860 | 0.09 | 0.92 | 0.83 | FAM196B  |
| Breast tumor metastasis (468LN) | 6  | 12313555  | 12330214  | 0.04 | 0.87 | 0.83 | EDN1     |
| Breast tumor metastasis (468LN) | 5  | 61211861  | 61217024  | 0.00 | 0.83 | 0.83 | C5orf64  |
| Breast tumor metastasis (468LN) | 8  | 32082261  | 32138267  | 0.02 | 0.84 | 0.82 | NRG1     |
| Breast tumor metastasis (468LN) | 8  | 32082261  | 32138267  | 0.02 | 0.84 | 0.82 | NRG1     |
| Breast tumor metastasis (468LN) | 8  | 32082261  | 32138267  | 0.02 | 0.84 | 0.82 | NRG1     |
| Breast tumor metastasis (468LN) | 8  | 32082261  | 32138267  | 0.02 | 0.84 | 0.82 | NRG1     |
| Breast tumor metastasis (468LN) | 8  | 32082261  | 32138267  | 0.02 | 0.84 | 0.82 | NRG1     |
| Breast tumor metastasis (468LN) | 8  | 32082261  | 32138267  | 0.02 | 0.84 | 0.82 | NRG1     |
| Breast tumor metastasis (468LN) | 8  | 32082261  | 32138267  | 0.02 | 0.84 | 0.82 | NRG1     |
| Breast tumor metastasis (468LN) | 7  | 18547133  | 18551508  | 0.00 | 0.82 | 0.82 | HDAC9    |

|                                 |    |           |           |      |      |      |            |
|---------------------------------|----|-----------|-----------|------|------|------|------------|
| Breast tumor metastasis (468LN) | 4  | 13908076  | 13924205  | 0.00 | 0.81 | 0.81 | BOD1L1     |
| Breast tumor metastasis (468LN) | 6  | 143645048 | 143661635 | 0.00 | 0.81 | 0.81 | AL031320.1 |
| Breast tumor metastasis (468LN) | 2  | 70570838  | 70616677  | 0.00 | 0.80 | 0.80 | FAM136A    |
| Breast tumor metastasis (468LN) | 9  | 91379222  | 91406810  | 0.00 | 0.80 | 0.80 | C9orf47    |
| Breast tumor metastasis (468LN) | 7  | 55000692  | 55038342  | 0.02 | 0.81 | 0.79 | EGFR       |
| Breast tumor metastasis (468LN) | 4  | 74454199  | 74487257  | 0.06 | 0.85 | 0.79 | RASSF6     |
| Breast tumor metastasis (468LN) | 2  | 121929305 | 121969683 | 0.03 | 0.81 | 0.78 | TFCP2L1    |
| Breast tumor metastasis (468LN) | 15 | 71567004  | 71589795  | 0.10 | 0.88 | 0.78 | THSD4      |
| Breast tumor metastasis (468LN) | 17 | 69398086  | 69438343  | 0.00 | 0.77 | 0.77 | AC007461.1 |
| Breast tumor metastasis (468LN) | 12 | 70358689  | 70362371  | 0.00 | 0.77 | 0.77 | MYRFL      |
| Breast tumor metastasis (468LN) | 8  | 32160365  | 32202004  | 0.05 | 0.81 | 0.76 | NRG1       |
| Breast tumor metastasis (468LN) | 8  | 32160365  | 32202004  | 0.05 | 0.81 | 0.76 | NRG1       |
| Breast tumor metastasis (468LN) | 8  | 32160365  | 32202004  | 0.05 | 0.81 | 0.76 | NRG1       |
| Breast tumor metastasis (468LN) | 8  | 32160365  | 32202004  | 0.05 | 0.81 | 0.76 | NRG1       |
| Breast tumor metastasis (468LN) | 8  | 32160365  | 32202004  | 0.05 | 0.81 | 0.76 | NRG1       |
| Breast tumor metastasis (468LN) | 8  | 32160365  | 32202004  | 0.05 | 0.81 | 0.76 | NRG1       |
| Breast tumor metastasis (468LN) | 5  | 1930374   | 1976494   | 0.12 | 0.88 | 0.76 | IRX4       |
| Breast tumor metastasis (468LN) | 20 | 1445625   | 1487649   | 0.07 | 0.83 | 0.76 | SIRPB2     |
| Breast tumor metastasis (468LN) | 10 | 108182232 | 108202133 | 0.00 | 0.76 | 0.76 | SORCS1     |
| Breast tumor metastasis (468LN) | 5  | 66283790  | 66335622  | 0.08 | 0.83 | 0.75 | MAST4      |
| Breast tumor metastasis (468LN) | 7  | 22893734  | 22901595  | 0.14 | 0.88 | 0.74 | TOMM7      |
| Breast tumor metastasis (468LN) | 6  | 80234368  | 80256281  | 0.23 | 0.95 | 0.73 | LCA5       |
| Breast tumor metastasis (468LN) | 22 | 27868674  | 27873807  | 0.23 | 0.95 | 0.72 | MN1        |
| Breast tumor metastasis (468LN) | 21 | 39831004  | 39862029  | 0.02 | 0.72 | 0.71 | ERG        |
| Breast tumor metastasis (468LN) | 6  | 54710175  | 54759167  | 0.04 | 0.74 | 0.70 | FAM83B     |
| Breast tumor metastasis (468LN) | 3  | 123517889 | 123561019 | 0.03 | 0.72 | 0.69 | MYLK       |
| Breast tumor metastasis (468LN) | 8  | 128672774 | 128685618 | 0.05 | 0.71 | 0.66 | MYC        |
| Breast tumor metastasis (468LN) | 3  | 188984945 | 189053159 | 0.01 | 0.66 | 0.65 | TPRG1      |
| Breast tumor metastasis (468LN) | 2  | 17760510  | 17781417  | 0.06 | 0.69 | 0.64 | VSNL1      |
| Breast tumor metastasis (468LN) | 13 | 25237454  | 25247430  | 0.18 | 0.81 | 0.64 | ATP12A     |
| Breast tumor metastasis (468LN) | 7  | 36690919  | 36727628  | 0.02 | 0.65 | 0.63 | AOAH       |
| Breast tumor metastasis (468LN) | 3  | 189540773 | 189562008 | 0.08 | 0.69 | 0.62 | TP63       |
| Breast tumor metastasis (468LN) | 3  | 189540773 | 189562008 | 0.08 | 0.69 | 0.62 | TP63       |
| Breast tumor metastasis (468LN) | 3  | 189540773 | 189562008 | 0.08 | 0.69 | 0.62 | TP63       |
| Breast tumor metastasis (468LN) | 3  | 189540773 | 189562008 | 0.08 | 0.69 | 0.62 | TP63       |
| Breast tumor metastasis (468LN) | 3  | 189540773 | 189562008 | 0.08 | 0.69 | 0.62 | TP63       |
| Breast tumor metastasis (468LN) | 17 | 39734929  | 39745765  | 0.08 | 0.69 | 0.61 | KRT14      |
| Breast tumor metastasis (468LN) | 3  | 9208190   | 9218379   | 0.08 | 0.68 | 0.61 | SRGAP3     |
| Breast tumor metastasis (468LN) | 8  | 66840219  | 66887130  | 0.06 | 0.66 | 0.61 | DNAJC5B    |

|                                 |    |           |           |      |      |      |            |
|---------------------------------|----|-----------|-----------|------|------|------|------------|
| Breast tumor metastasis (468LN) | 8  | 66840219  | 66887130  | 0.06 | 0.66 | 0.61 | DNAJC5B    |
| Breast tumor metastasis (468LN) | 5  | 148155468 | 148172554 | 0.00 | 0.60 | 0.60 | ADRB2      |
| Breast tumor metastasis (468LN) | 3  | 111296776 | 111315059 | 0.00 | 0.59 | 0.59 | ZBED2      |
| Breast tumor metastasis (468LN) | 5  | 64484499  | 64507100  | 0.00 | 0.59 | 0.59 | ADAMTS6    |
| Breast tumor metastasis (468LN) | 5  | 52540140  | 52559537  | 0.03 | 0.62 | 0.59 | MOCS2      |
| Breast tumor metastasis (468LN) | 11 | 12130227  | 12162030  | 0.10 | 0.67 | 0.57 | MICAL2     |
| Breast tumor metastasis (468LN) | 1  | 94425779  | 94461050  | 0.03 | 0.60 | 0.56 | ABCA4      |
| Breast tumor metastasis (468LN) | 15 | 83945999  | 83992250  | 0.08 | 0.65 | 0.56 | BNC1       |
| Breast tumor metastasis (468LN) | 6  | 107163126 | 107200634 | 0.01 | 0.57 | 0.56 | QRSL1      |
| Breast tumor metastasis (468LN) | 1  | 209527622 | 209609482 | 0.05 | 0.61 | 0.56 | CAMK1G     |
| Breast tumor metastasis (468LN) | 9  | 124030410 | 124052489 | 0.40 | 0.95 | 0.55 | GSN        |
| Breast tumor metastasis (468LN) | 3  | 44923928  | 44941628  | 0.03 | 0.58 | 0.54 | TGM4       |
| Breast tumor metastasis (468LN) | 8  | 128402145 | 128416279 | 0.12 | 0.66 | 0.54 | POU5F1B    |
| Breast tumor metastasis (468LN) | 7  | 130643572 | 130647502 | 0.19 | 0.73 | 0.53 | MKLN1      |
| Breast tumor metastasis (468LN) | 10 | 82213990  | 82238676  | 0.25 | 0.78 | 0.53 | TSPAN14    |
| Breast tumor metastasis (468LN) | 11 | 58340393  | 58348640  | 0.48 | 1.00 | 0.52 | ZFP91-CNTF |
| Breast tumor metastasis (468LN) | 2  | 1708289   | 1747387   | 0.12 | 0.62 | 0.50 | PXDN       |
| Breast tumor metastasis (468LN) | 10 | 6762937   | 6792166   | 0.11 | 0.61 | 0.50 | PRKCQ      |
| Breast tumor metastasis (468LN) | 4  | 100367626 | 100385121 | 0.00 | 0.50 | 0.50 | ADH7       |
| Breast tumor metastasis (468LN) | 12 | 109114581 | 109129684 | 0.20 | 0.69 | 0.49 | CORO1C     |
| Breast tumor metastasis (468LN) | 17 | 34104001  | 34120836  | 0.05 | 0.54 | 0.49 | MMP28      |
| Breast tumor metastasis (468LN) | 7  | 134297576 | 134309091 | 0.00 | 0.48 | 0.48 | BPGM       |
| Breast tumor metastasis (468LN) | 2  | 70745929  | 70782514  | 0.07 | 0.54 | 0.47 | TGFA       |
| Breast tumor metastasis (468LN) | 2  | 208102152 | 208124172 | 0.08 | 0.55 | 0.47 | KLF7       |
| Breast tumor metastasis (468LN) | 18 | 20393690  | 20449701  | 0.01 | 0.48 | 0.47 | RBBP8      |
| Breast tumor metastasis (468LN) | 1  | 162875345 | 162886688 | 0.00 | 0.47 | 0.47 | C1orf110   |
| Breast tumor metastasis (468LN) | 1  | 162875345 | 162886688 | 0.00 | 0.47 | 0.47 | C1orf110   |
| Breast tumor metastasis (468LN) | 8  | 29196390  | 29211042  | 0.48 | 0.94 | 0.46 | DUSP4      |
| Breast tumor metastasis (468LN) | 12 | 52820050  | 52849388  | 0.03 | 0.49 | 0.46 | KRT6B      |
| Breast tumor metastasis (468LN) | 9  | 118011886 | 118026827 | 0.00 | 0.45 | 0.45 | 1-Dec      |
| Breast tumor metastasis (468LN) | 5  | 33299342  | 33322096  | 0.04 | 0.49 | 0.44 | TARS       |
| Breast tumor metastasis (468LN) | 4  | 15893942  | 15940788  | 0.01 | 0.45 | 0.44 | FGFBP1     |
| Breast tumor metastasis (468LN) | 16 | 68669444  | 68711125  | 0.14 | 0.58 | 0.44 | CDH3       |
| Breast tumor metastasis (468LN) | 19 | 33840783  | 33869285  | 0.07 | 0.49 | 0.42 | CEBPG      |
| Breast tumor metastasis (468LN) | 11 | 12085413  | 12114013  | 0.03 | 0.45 | 0.42 | MICAL2     |
| Breast tumor metastasis (468LN) | 2  | 99524648  | 99538593  | 0.14 | 0.56 | 0.42 | KIAA1211L  |
| Breast tumor metastasis (468LN) | 3  | 131851786 | 131856052 | 0.02 | 0.44 | 0.42 | CPNE4      |
| Breast tumor metastasis (468LN) | 7  | 48120763  | 48135456  | 0.12 | 0.54 | 0.42 | UPP1       |
| Breast tumor metastasis (468LN) | 22 | 25338358  | 25391181  | 0.11 | 0.52 | 0.41 | TMEM211    |

|                                 |    |           |           |      |      |      |            |
|---------------------------------|----|-----------|-----------|------|------|------|------------|
| Breast tumor metastasis (468LN) | 6  | 143716698 | 143732923 | 0.04 | 0.44 | 0.40 | AL031320.1 |
| Breast tumor metastasis (468LN) | 1  | 221611253 | 221636061 | 0.04 | 0.43 | 0.40 | DUSP10     |
| Breast tumor metastasis (468LN) | 10 | 118176539 | 118201896 | 0.00 | 0.39 | 0.39 | PNLIPRP3   |
| Breast tumor metastasis (468LN) | 18 | 28809492  | 28837065  | 0.06 | 0.44 | 0.38 | DSG1       |
| Breast tumor metastasis (468LN) | 10 | 24737918  | 24757794  | 0.37 | 0.76 | 0.38 | KIAA1217   |
| Breast tumor metastasis (468LN) | 20 | 51581498  | 51597746  | 0.45 | 0.82 | 0.37 | TSHZ2      |
| Breast tumor metastasis (468LN) | 17 | 39674641  | 39706091  | 0.17 | 0.54 | 0.37 | KRT19      |
| Breast tumor metastasis (468LN) | 4  | 11615367  | 11638574  | 0.00 | 0.37 | 0.37 | HS3ST1     |
| Breast tumor metastasis (468LN) | 7  | 41136094  | 41161972  | 0.04 | 0.41 | 0.37 | C7orf10    |
| Breast tumor metastasis (468LN) | 6  | 17863327  | 17868787  | 0.00 | 0.36 | 0.36 | KIF13A     |
| Breast tumor metastasis (468LN) | 8  | 32403683  | 32442699  | 0.19 | 0.55 | 0.36 | NRG1       |
| Breast tumor metastasis (468LN) | 11 | 128362001 | 128396377 | 0.21 | 0.57 | 0.36 | ETS1       |
| Breast tumor metastasis (468LN) | 11 | 18328431  | 18352028  | 0.10 | 0.45 | 0.36 | GTF2H1     |
| Breast tumor metastasis (468LN) | X  | 105509168 | 105546610 | 0.00 | 0.35 | 0.35 | MUM1L1     |
| Breast tumor metastasis (468LN) | 12 | 59433027  | 59479164  | 0.05 | 0.40 | 0.34 | LRIG3      |
| Breast tumor metastasis (468LN) | 20 | 56261686  | 56292224  | 0.14 | 0.47 | 0.33 | PMEPA1     |
| Breast tumor metastasis (468LN) | 5  | 168586808 | 168610831 | 0.05 | 0.38 | 0.33 | SLIT3      |
| Breast tumor metastasis (468LN) | 11 | 12183685  | 12222874  | 0.04 | 0.36 | 0.33 | MICAL2     |
| Breast tumor metastasis (468LN) | 21 | 30003125  | 30011412  | 0.00 | 0.33 | 0.33 | N6AMT1     |
| Breast tumor metastasis (468LN) | 21 | 30003125  | 30011412  | 0.00 | 0.33 | 0.33 | N6AMT1     |
| Breast tumor metastasis (468LN) | 21 | 30003125  | 30011412  | 0.00 | 0.33 | 0.33 | N6AMT1     |
| Breast tumor metastasis (468LN) | 6  | 53475369  | 53500722  | 0.04 | 0.36 | 0.33 | GCLC       |
| Breast tumor metastasis (468LN) | 5  | 95554865  | 95565313  | 0.00 | 0.32 | 0.32 | PCSK1      |
| Breast tumor metastasis (468LN) | 11 | 114162169 | 114180527 | 0.26 | 0.58 | 0.32 | NNMT       |
| Breast tumor metastasis (468LN) | 4  | 186225739 | 186230197 | 0.00 | 0.31 | 0.31 | SNX25      |
| Breast tumor metastasis (468LN) | 2  | 206514186 | 206569665 | 0.11 | 0.41 | 0.30 | NRP2       |
| Breast tumor metastasis (468LN) | 18 | 59613226  | 59621595  | 0.06 | 0.36 | 0.30 | RNF152     |
| Breast tumor metastasis (468LN) | 11 | 15986587  | 15993130  | 0.00 | 0.30 | 0.30 | SOX6       |
| Breast tumor metastasis (468LN) | 5  | 86394511  | 86425151  | 0.00 | 0.30 | 0.30 | AC008394.1 |
| Breast tumor metastasis (468LN) | 17 | 805322    | 839104    | 0.10 | 0.40 | 0.29 | NXN        |
| Breast tumor metastasis (468LN) | 21 | 40386166  | 40424480  | 0.08 | 0.37 | 0.29 | PSMG1      |
| Breast tumor metastasis (468LN) | 6  | 116684394 | 116720580 | 0.05 | 0.34 | 0.29 | DSE        |
| Breast tumor metastasis (468LN) | 6  | 111906089 | 111928358 | 0.33 | 0.61 | 0.28 | TRAF3IP2   |
| Breast tumor metastasis (468LN) | 21 | 44720362  | 44794103  | 0.13 | 0.41 | 0.28 | SIK1       |
| Breast tumor metastasis (468LN) | 3  | 111518531 | 111530936 | 0.08 | 0.35 | 0.27 | PHLDB2     |
| Breast tumor metastasis (468LN) | 3  | 111518531 | 111530936 | 0.08 | 0.35 | 0.27 | PHLDB2     |
| Breast tumor metastasis (468LN) | 21 | 44907375  | 44943674  | 0.06 | 0.33 | 0.27 | SIK1       |
| Breast tumor metastasis (468LN) | 13 | 73984215  | 74005603  | 0.00 | 0.27 | 0.27 | KLF5       |
| Breast tumor metastasis (468LN) | 9  | 111295882 | 111325768 | 0.00 | 0.27 | 0.27 | ACTL7B     |

|                                 |    |           |           |      |      |      |         |
|---------------------------------|----|-----------|-----------|------|------|------|---------|
| Breast tumor metastasis (468LN) | 11 | 93860386  | 93869783  | 0.22 | 0.48 | 0.26 | PANX1   |
| Breast tumor metastasis (468LN) | 10 | 99443070  | 99451242  | 0.24 | 0.49 | 0.25 | AVPI1   |
| Lung adenocarcinoma (H1437)     | 12 | 108664152 | 108729705 | 0.02 | 0.99 | 0.97 | CMKLR1  |
| Lung adenocarcinoma (H1437)     | 12 | 2321941   | 2506285   | 0.01 | 0.96 | 0.96 | CACNA1C |
| Lung adenocarcinoma (H1437)     | 6  | 164505820 | 164531835 | 0.01 | 0.92 | 0.91 | QKI     |
| Lung adenocarcinoma (H1437)     | 3  | 16923413  | 16959538  | 0.07 | 0.94 | 0.86 | PLCL2   |
| Lung adenocarcinoma (H1437)     | 12 | 2160784   | 2308190   | 0.03 | 0.89 | 0.86 | CACNA1C |
| Lung adenocarcinoma (H1437)     | 11 | 128560125 | 128616737 | 0.09 | 0.94 | 0.85 | FLI1    |
| Lung adenocarcinoma (H1437)     | 8  | 12937916  | 12990887  | 0.08 | 0.92 | 0.84 | DLC1    |
| Lung adenocarcinoma (H1437)     | 1  | 153579237 | 153590776 | 0.04 | 0.86 | 0.81 | S100A14 |
| Lung adenocarcinoma (H1437)     | 14 | 23898802  | 23913794  | 0.00 | 0.80 | 0.80 | MYH7    |
| Lung adenocarcinoma (H1437)     | 10 | 11188477  | 11246900  | 0.03 | 0.83 | 0.80 | CELF2   |
| Lung adenocarcinoma (H1437)     | 16 | 49857837  | 49893960  | 0.17 | 0.95 | 0.78 | ZNF423  |
| Lung adenocarcinoma (H1437)     | 17 | 32547489  | 32583972  | 0.05 | 0.82 | 0.77 | CCL2    |
| Lung adenocarcinoma (H1437)     | 11 | 67775074  | 67783359  | 0.10 | 0.84 | 0.74 | UNC93B1 |
| Lung adenocarcinoma (H1437)     | 14 | 23870473  | 23890571  | 0.00 | 0.72 | 0.72 | MYH6    |
| Lung adenocarcinoma (H1437)     | 5  | 175084363 | 175123938 | 0.05 | 0.76 | 0.71 | HRH2    |
| Lung adenocarcinoma (H1437)     | 6  | 45914072  | 45984711  | 0.02 | 0.72 | 0.70 | CLIC5   |
| Lung adenocarcinoma (H1437)     | 11 | 124745703 | 124772028 | 0.07 | 0.76 | 0.68 | ROBO4   |
| Lung adenocarcinoma (H1437)     | 15 | 68564041  | 68574856  | 0.24 | 0.91 | 0.68 | FEM1B   |
| Lung adenocarcinoma (H1437)     | 20 | 43963996  | 43977803  | 0.09 | 0.75 | 0.66 | SDC4    |
| Lung adenocarcinoma (H1437)     | 3  | 14834008  | 14933715  | 0.04 | 0.66 | 0.62 | FGD5    |
| Lung adenocarcinoma (H1437)     | 12 | 4377579   | 4414053   | 0.22 | 0.79 | 0.57 | CCND2   |
| Lung adenocarcinoma (H1437)     | 10 | 17256938  | 17276860  | 0.22 | 0.77 | 0.55 | VIM     |
| Lung adenocarcinoma (H1437)     | 11 | 74858188  | 74908024  | 0.00 | 0.54 | 0.54 | SLCO2B1 |
| Lung adenocarcinoma (H1437)     | 12 | 114806250 | 114852976 | 0.45 | 0.93 | 0.48 | TBX5    |
| Lung adenocarcinoma (H1437)     | 1  | 8063878   | 8088662   | 0.20 | 0.68 | 0.48 | ERRFI1  |
| Lung adenocarcinoma (H1437)     | 17 | 79337961  | 79404678  | 0.22 | 0.70 | 0.47 | BAHCC1  |
| Lung adenocarcinoma (H1437)     | 1  | 151960740 | 151974470 | 0.24 | 0.65 | 0.40 | S100A10 |
| Lung adenocarcinoma (H1437)     | 6  | 139690764 | 139698884 | 0.53 | 0.94 | 0.40 | CITED2  |
| Lung adenocarcinoma (H1437)     | 7  | 150642159 | 150687879 | 0.17 | 0.57 | 0.40 | KCNH2   |
| Lung adenocarcinoma (H1437)     | 16 | 637852    | 644850    | 0.41 | 0.79 | 0.39 | RAB40C  |
| Lung adenocarcinoma (H1437)     | 16 | 29165405  | 29212441  | 0.01 | 0.39 | 0.38 | SNX29P2 |
| Lung adenocarcinoma (H1437)     | 22 | 50323334  | 50364887  | 0.25 | 0.61 | 0.37 | PIM3    |
| Lung adenocarcinoma (H1437)     | 3  | 53269245  | 53309568  | 0.07 | 0.42 | 0.35 | TKT     |
| Lung adenocarcinoma (H1437)     | 1  | 153537691 | 153541885 | 0.41 | 0.76 | 0.34 | S100A2  |
| Lung adenocarcinoma (H1437)     | 2  | 145236716 | 145282659 | 0.29 | 0.63 | 0.34 | ZEB2    |
| Lung adenocarcinoma (H1437)     | 9  | 132241137 | 132264724 | 0.28 | 0.61 | 0.33 | NTMT1   |
| Lung adenocarcinoma (H1437)     | 6  | 82458588  | 82464329  | 0.56 | 0.89 | 0.33 | FAM46A  |

|                                     |    |           |           |      |      |      |              |
|-------------------------------------|----|-----------|-----------|------|------|------|--------------|
| Lung adenocarcinoma (H1437)         | 17 | 48131999  | 48143308  | 0.25 | 0.58 | 0.33 | ITGA3        |
| Lung adenocarcinoma (H1437)         | 17 | 79300771  | 79323073  | 0.29 | 0.61 | 0.32 | TMEM105      |
| Lung adenocarcinoma (H1437)         | 3  | 64669880  | 64677423  | 0.57 | 0.88 | 0.32 | ADAMTS9      |
| Lung adenocarcinoma (H1437)         | 3  | 71625820  | 71634865  | 0.45 | 0.77 | 0.32 | FOXP1        |
| Lung adenocarcinoma (H1437)         | 21 | 47373962  | 47413579  | 0.16 | 0.48 | 0.31 | COL6A1       |
| Lung adenocarcinoma (H1437)         | 5  | 180668274 | 180675859 | 0.53 | 0.84 | 0.31 | GNB2L1       |
| Lung adenocarcinoma (H1437)         | 17 | 80223721  | 80257686  | 0.16 | 0.47 | 0.31 | CSNK1D       |
| Lung adenocarcinoma (H1437)         | 16 | 86504285  | 86554076  | 0.52 | 0.83 | 0.31 | FOXF1        |
| Lung adenocarcinoma (H1437)         | 22 | 19830490  | 19844157  | 0.25 | 0.55 | 0.30 | C22orf29     |
| Lung adenocarcinoma (H1437)         | 16 | 19117268  | 19151258  | 0.11 | 0.40 | 0.29 | CTD-2349B8.1 |
| Lung adenocarcinoma (H1437)         | 1  | 153504009 | 153510224 | 0.41 | 0.70 | 0.29 | S100A6       |
| Lung adenocarcinoma (H1437)         | 3  | 9437015   | 9444925   | 0.71 | 1.00 | 0.29 | SETD5        |
| Lung adenocarcinoma (H1437)         | 12 | 52536940  | 52547179  | 0.09 | 0.37 | 0.29 | KRT80        |
| Lung adenocarcinoma (H1437)         | 12 | 7032586   | 7039696   | 0.64 | 0.92 | 0.28 | ATN1         |
| Lung adenocarcinoma (H1437)         | 2  | 127412308 | 127428737 | 0.14 | 0.42 | 0.27 | GYPC         |
| Lung adenocarcinoma (H1437)         | 6  | 74224953  | 74234140  | 0.53 | 0.79 | 0.26 | EEF1A1       |
| Lung adenocarcinoma (H1437)         | 10 | 33226742  | 33251655  | 0.24 | 0.50 | 0.26 | ITGB1        |
| Lung adenocarcinoma (H1437)         | 19 | 13956569  | 13963420  | 0.41 | 0.66 | 0.25 | NANOS3       |
| Lung squamous cell carcinoma (H157) | 14 | 23898802  | 23913794  | 0.00 | 0.97 | 0.97 | MYH7         |
| Lung squamous cell carcinoma (H157) | 1  | 164717131 | 164764470 | 0.01 | 0.98 | 0.97 | PBX1         |
| Lung squamous cell carcinoma (H157) | 15 | 92456353  | 92524948  | 0.01 | 0.98 | 0.97 | SLCO3A1      |
| Lung squamous cell carcinoma (H157) | 12 | 2321941   | 2506285   | 0.01 | 0.98 | 0.97 | CACNA1C      |
| Lung squamous cell carcinoma (H157) | 12 | 108664152 | 108729705 | 0.02 | 0.99 | 0.97 | CMKLR1       |
| Lung squamous cell carcinoma (H157) | 7  | 51322792  | 51385835  | 0.03 | 0.98 | 0.95 | COBL         |
| Lung squamous cell carcinoma (H157) | 22 | 33196018  | 33254838  | 0.06 | 1.00 | 0.94 | TIMP3        |
| Lung squamous cell carcinoma (H157) | 6  | 11345367  | 11394452  | 0.01 | 0.95 | 0.94 | NEDD9        |
| Lung squamous cell carcinoma (H157) | 2  | 218653998 | 218760935 | 0.01 | 0.95 | 0.93 | TNS1         |
| Lung squamous cell carcinoma (H157) | 3  | 14834008  | 14933715  | 0.04 | 0.97 | 0.93 | FGD5         |
| Lung squamous cell carcinoma (H157) | 22 | 32924539  | 32976379  | 0.01 | 0.93 | 0.91 | SYN3         |
| Lung squamous cell carcinoma (H157) | 12 | 2160784   | 2308190   | 0.03 | 0.94 | 0.91 | CACNA1C      |
| Lung squamous cell carcinoma (H157) | 9  | 71319153  | 71371192  | 0.06 | 0.97 | 0.91 | PIP5K1B      |
| Lung squamous cell carcinoma (H157) | 22 | 34206955  | 34272052  | 0.03 | 0.94 | 0.91 | LARGE        |
| Lung squamous cell carcinoma (H157) | 3  | 123047106 | 123169548 | 0.02 | 0.93 | 0.91 | ADCY5        |
| Lung squamous cell carcinoma (H157) | 22 | 33011575  | 33041335  | 0.07 | 0.97 | 0.90 | SYN3         |
| Lung squamous cell carcinoma (H157) | 11 | 117730279 | 117757325 | 0.09 | 0.99 | 0.90 | FXYD6        |
| Lung squamous cell carcinoma (H157) | 10 | 116233610 | 116285340 | 0.00 | 0.89 | 0.89 | ABLIM1       |
| Lung squamous cell carcinoma (H157) | 11 | 19719061  | 19814464  | 0.05 | 0.94 | 0.89 | NAV2         |
| Lung squamous cell carcinoma (H157) | 5  | 175084363 | 175123938 | 0.05 | 0.94 | 0.89 | HRH2         |
| Lung squamous cell carcinoma (H157) | 15 | 92394913  | 92441672  | 0.06 | 0.95 | 0.89 | SLCO3A1      |



|                                     |    |           |           |      |      |      |          |
|-------------------------------------|----|-----------|-----------|------|------|------|----------|
| Lung squamous cell carcinoma (H157) | 1  | 175138842 | 175191990 | 0.07 | 0.95 | 0.88 | KIAA0040 |
| Lung squamous cell carcinoma (H157) | 3  | 16923413  | 16959538  | 0.07 | 0.95 | 0.88 | PLCL2    |
| Lung squamous cell carcinoma (H157) | 6  | 45914072  | 45984711  | 0.02 | 0.89 | 0.87 | CLIC5    |
| Lung squamous cell carcinoma (H157) | 9  | 677510    | 756481    | 0.04 | 0.90 | 0.86 | KANK1    |
| Lung squamous cell carcinoma (H157) | 4  | 23855744  | 23906109  | 0.05 | 0.91 | 0.86 | PPARGC1A |
| Lung squamous cell carcinoma (H157) | 10 | 11188477  | 11246900  | 0.03 | 0.89 | 0.86 | CELF2    |
| Lung squamous cell carcinoma (H157) | 10 | 97137580  | 97321838  | 0.02 | 0.87 | 0.85 | SORBS1   |
| Lung squamous cell carcinoma (H157) | 1  | 208373068 | 208418917 | 0.11 | 0.96 | 0.85 | PLXNA2   |
| Lung squamous cell carcinoma (H157) | 6  | 112519021 | 112620635 | 0.03 | 0.88 | 0.84 | LAMA4    |
| Lung squamous cell carcinoma (H157) | 10 | 116297903 | 116338177 | 0.00 | 0.83 | 0.83 | ABLIM1   |
| Lung squamous cell carcinoma (H157) | 11 | 11556367  | 11614464  | 0.00 | 0.82 | 0.82 | GALNT18  |
| Lung squamous cell carcinoma (H157) | 1  | 201326267 | 201371297 | 0.03 | 0.84 | 0.81 | LAD1     |
| Lung squamous cell carcinoma (H157) | 14 | 23870473  | 23890571  | 0.00 | 0.81 | 0.81 | MYH6     |
| Lung squamous cell carcinoma (H157) | 2  | 218814905 | 218887533 | 0.05 | 0.85 | 0.80 | TNS1     |
| Lung squamous cell carcinoma (H157) | 1  | 208057100 | 208099004 | 0.05 | 0.83 | 0.79 | CD34     |
| Lung squamous cell carcinoma (H157) | 13 | 113612236 | 113642719 | 0.07 | 0.84 | 0.78 | MCF2L    |
| Lung squamous cell carcinoma (H157) | 6  | 46859103  | 46921360  | 0.04 | 0.81 | 0.77 | GPR116   |
| Lung squamous cell carcinoma (H157) | 11 | 128560125 | 128616737 | 0.09 | 0.86 | 0.77 | FLI1     |
| Lung squamous cell carcinoma (H157) | 2  | 1701232   | 1756057   | 0.07 | 0.83 | 0.76 | PXDN     |
| Lung squamous cell carcinoma (H157) | 2  | 206546300 | 206580305 | 0.14 | 0.90 | 0.76 | NRP2     |
| Lung squamous cell carcinoma (H157) | 3  | 46885844  | 46916759  | 0.08 | 0.83 | 0.75 | MYL3     |
| Lung squamous cell carcinoma (H157) | 10 | 45484961  | 45497498  | 0.13 | 0.87 | 0.74 | ZNF22    |
| Lung squamous cell carcinoma (H157) | 16 | 49857837  | 49893960  | 0.17 | 0.91 | 0.74 | ZNF423   |
| Lung squamous cell carcinoma (H157) | 9  | 73070671  | 73110216  | 0.03 | 0.77 | 0.74 | KLF9     |
| Lung squamous cell carcinoma (H157) | 3  | 13031469  | 13061226  | 0.11 | 0.85 | 0.73 | IQSEC1   |
| Lung squamous cell carcinoma (H157) | 1  | 203236433 | 203297636 | 0.16 | 0.87 | 0.71 | BTG2     |
| Lung squamous cell carcinoma (H157) | 22 | 18913160  | 18924266  | 0.07 | 0.78 | 0.71 | PRODH    |
| Lung squamous cell carcinoma (H157) | 2  | 42273101  | 42300251  | 0.08 | 0.78 | 0.70 | PKDCC    |
| Lung squamous cell carcinoma (H157) | 1  | 167585748 | 167668005 | 0.01 | 0.71 | 0.69 | RCSD1    |
| Lung squamous cell carcinoma (H157) | 10 | 116356071 | 116457594 | 0.02 | 0.70 | 0.68 | ABLIM1   |
| Lung squamous cell carcinoma (H157) | 6  | 164505820 | 164531835 | 0.01 | 0.69 | 0.67 | QKI      |
| Lung squamous cell carcinoma (H157) | 15 | 64259521  | 64312980  | 0.00 | 0.66 | 0.66 | DAPK2    |
| Lung squamous cell carcinoma (H157) | 3  | 123371190 | 123441485 | 0.03 | 0.67 | 0.64 | MYLK     |
| Lung squamous cell carcinoma (H157) | 6  | 167010067 | 167054751 | 0.08 | 0.71 | 0.63 | RPS6KA2  |
| Lung squamous cell carcinoma (H157) | 1  | 16338365  | 16348730  | 0.11 | 0.73 | 0.63 | CLCNKA   |
| Lung squamous cell carcinoma (H157) | 11 | 113906599 | 114092628 | 0.05 | 0.67 | 0.62 | ZBTB16   |
| Lung squamous cell carcinoma (H157) | 14 | 100196476 | 100226407 | 0.15 | 0.75 | 0.61 | EML1     |
| Lung squamous cell carcinoma (H157) | 17 | 32547489  | 32583972  | 0.05 | 0.64 | 0.59 | CCL2     |
| Lung squamous cell carcinoma (H157) | 11 | 58938916  | 58992734  | 0.05 | 0.64 | 0.59 | MPEG1    |

|                                     |    |           |           |      |      |      |              |
|-------------------------------------|----|-----------|-----------|------|------|------|--------------|
| Lung squamous cell carcinoma (H157) | 2  | 159810283 | 159870494 | 0.06 | 0.61 | 0.55 | TANC1        |
| Lung squamous cell carcinoma (H157) | 5  | 148793738 | 148806368 | 0.07 | 0.62 | 0.55 | IL17B        |
| Lung squamous cell carcinoma (H157) | 17 | 53342089  | 53373406  | 0.13 | 0.67 | 0.54 | HLF          |
| Lung squamous cell carcinoma (H157) | 3  | 138066340 | 138119923 | 0.04 | 0.57 | 0.53 | MRAS         |
| Lung squamous cell carcinoma (H157) | 10 | 88420822  | 88454560  | 0.01 | 0.55 | 0.53 | LDB3         |
| Lung squamous cell carcinoma (H157) | 7  | 150642159 | 150687879 | 0.17 | 0.69 | 0.52 | KCNH2        |
| Lung squamous cell carcinoma (H157) | 3  | 128718996 | 128746653 | 0.14 | 0.66 | 0.52 | EFCC1        |
| Lung squamous cell carcinoma (H157) | 9  | 73168217  | 73230803  | 0.02 | 0.54 | 0.52 | KLF9         |
| Lung squamous cell carcinoma (H157) | 5  | 141183253 | 141261839 | 0.14 | 0.65 | 0.51 | PCDH1        |
| Lung squamous cell carcinoma (H157) | 2  | 233923287 | 233954214 | 0.11 | 0.62 | 0.51 | INPP5D       |
| Lung squamous cell carcinoma (H157) | 1  | 26386415  | 26449049  | 0.04 | 0.55 | 0.51 | PDIK1L       |
| Lung squamous cell carcinoma (H157) | 15 | 66905412  | 66955707  | 0.04 | 0.55 | 0.51 | RP11-321F6.1 |
| Lung squamous cell carcinoma (H157) | 19 | 33751162  | 33802757  | 0.14 | 0.64 | 0.50 | CEBPA        |
| Lung squamous cell carcinoma (H157) | 22 | 37562253  | 37596293  | 0.18 | 0.67 | 0.49 | C1QTNF6      |
| Lung squamous cell carcinoma (H157) | 1  | 41939307  | 41981913  | 0.03 | 0.52 | 0.49 | EDN2         |
| Lung squamous cell carcinoma (H157) | 16 | 46764273  | 46798191  | 0.03 | 0.51 | 0.49 | MYLK3        |
| Lung squamous cell carcinoma (H157) | 1  | 47676896  | 47710031  | 0.21 | 0.70 | 0.49 | TAL1         |
| Lung squamous cell carcinoma (H157) | 15 | 65346572  | 65383634  | 0.08 | 0.56 | 0.48 | KBTBD13      |
| Lung squamous cell carcinoma (H157) | 3  | 53174020  | 53206578  | 0.08 | 0.55 | 0.47 | PRKCD        |
| Lung squamous cell carcinoma (H157) | 12 | 114806250 | 114852976 | 0.45 | 0.90 | 0.45 | TBX5         |
| Lung squamous cell carcinoma (H157) | 10 | 45452698  | 45465905  | 0.11 | 0.55 | 0.45 | RASSF4       |
| Lung squamous cell carcinoma (H157) | 15 | 85359756  | 85408023  | 0.01 | 0.46 | 0.45 | ALPK3        |
| Lung squamous cell carcinoma (H157) | 12 | 109547560 | 109572829 | 0.04 | 0.49 | 0.44 | ACACB        |
| Lung squamous cell carcinoma (H157) | 5  | 148650125 | 148713310 | 0.02 | 0.46 | 0.44 | AFAP1L1      |
| Lung squamous cell carcinoma (H157) | 2  | 220473619 | 220511327 | 0.05 | 0.49 | 0.44 | SLC4A3       |
| Lung squamous cell carcinoma (H157) | 3  | 126068503 | 126077592 | 0.29 | 0.73 | 0.44 | KLF15        |
| Lung squamous cell carcinoma (H157) | 16 | 29165405  | 29212441  | 0.01 | 0.45 | 0.43 | SNX29P2      |
| Lung squamous cell carcinoma (H157) | 12 | 52288433  | 52321075  | 0.05 | 0.47 | 0.43 | ACVRL1       |
| Lung squamous cell carcinoma (H157) | 5  | 148513364 | 148558772 | 0.02 | 0.44 | 0.42 | ABLIM3       |
| Lung squamous cell carcinoma (H157) | 6  | 11194797  | 11293348  | 0.06 | 0.48 | 0.42 | NEDD9        |
| Lung squamous cell carcinoma (H157) | 11 | 62646517  | 62690197  | 0.11 | 0.52 | 0.41 | CHRM1        |
| Lung squamous cell carcinoma (H157) | 15 | 57840518  | 57983809  | 0.01 | 0.42 | 0.41 | GCOM1        |
| Lung squamous cell carcinoma (H157) | 2  | 30440179  | 30497935  | 0.08 | 0.48 | 0.40 | LBH          |
| Lung squamous cell carcinoma (H157) | 1  | 94485792  | 94536633  | 0.03 | 0.43 | 0.40 | ABCA4        |
| Lung squamous cell carcinoma (H157) | 5  | 142177195 | 142264107 | 0.00 | 0.40 | 0.39 | ARHGAP26     |
| Lung squamous cell carcinoma (H157) | 16 | 57653421  | 57683065  | 0.02 | 0.41 | 0.39 | GPR56        |
| Lung squamous cell carcinoma (H157) | 2  | 159936457 | 160087427 | 0.01 | 0.40 | 0.39 | TANC1        |
| Lung squamous cell carcinoma (H157) | 8  | 12610121  | 12624953  | 0.34 | 0.73 | 0.38 | LONRF1       |
| Lung squamous cell carcinoma (H157) | 12 | 117479472 | 117535649 | 0.01 | 0.39 | 0.38 | TESC         |

|                                     |    |           |           |      |      |      |            |
|-------------------------------------|----|-----------|-----------|------|------|------|------------|
| Lung squamous cell carcinoma (H157) | 16 | 58484914  | 58536190  | 0.08 | 0.46 | 0.38 | NDRG4      |
| Lung squamous cell carcinoma (H157) | 20 | 19737283  | 19767891  | 0.13 | 0.50 | 0.38 | AL121761.2 |
| Lung squamous cell carcinoma (H157) | 10 | 73469788  | 73536258  | 0.05 | 0.42 | 0.37 | C10orf54   |
| Lung squamous cell carcinoma (H157) | 3  | 156802993 | 156855459 | 0.06 | 0.43 | 0.37 | CCNL1      |
| Lung squamous cell carcinoma (H157) | 6  | 13383397  | 13489697  | 0.04 | 0.41 | 0.37 | AL583828.1 |
| Lung squamous cell carcinoma (H157) | 9  | 116236515 | 116397394 | 0.04 | 0.41 | 0.37 | RGS3       |
| Lung squamous cell carcinoma (H157) | 1  | 55007351  | 55053202  | 0.05 | 0.41 | 0.36 | ACOT11     |
| Lung squamous cell carcinoma (H157) | 16 | 66392035  | 66422229  | 0.05 | 0.41 | 0.36 | CDH5       |
| Lung squamous cell carcinoma (H157) | 17 | 4379415   | 4447094   | 0.09 | 0.44 | 0.35 | MYBBP1A    |
| Lung squamous cell carcinoma (H157) | 10 | 105494540 | 105555321 | 0.01 | 0.36 | 0.34 | SH3PXD2A   |
| Lung squamous cell carcinoma (H157) | 11 | 74858188  | 74908024  | 0.00 | 0.34 | 0.34 | SLCO2B1    |
| Lung squamous cell carcinoma (H157) | 10 | 71158153  | 71242818  | 0.05 | 0.38 | 0.33 | TSPAN15    |
| Lung squamous cell carcinoma (H157) | 1  | 151960740 | 151974470 | 0.24 | 0.57 | 0.33 | S100A10    |
| Lung squamous cell carcinoma (H157) | 22 | 36541286  | 36558381  | 0.18 | 0.51 | 0.33 | APOL3      |
| Lung squamous cell carcinoma (H157) | 1  | 2056832   | 2083663   | 0.06 | 0.38 | 0.32 | PRKCZ      |
| Lung squamous cell carcinoma (H157) | 6  | 33659980  | 33715998  | 0.04 | 0.37 | 0.32 | IP6K3      |
| Lung squamous cell carcinoma (H157) | 20 | 24972518  | 25040392  | 0.09 | 0.40 | 0.31 | ACSS1      |
| Lung squamous cell carcinoma (H157) | 17 | 56583934  | 56616821  | 0.16 | 0.47 | 0.31 | 4-Sep      |
| Lung squamous cell carcinoma (H157) | 14 | 89852016  | 89897880  | 0.11 | 0.42 | 0.31 | FOXN3-AS1  |
| Lung squamous cell carcinoma (H157) | 9  | 129783892 | 129898008 | 0.01 | 0.32 | 0.31 | ANGPTL2    |
| Lung squamous cell carcinoma (H157) | 1  | 31839527  | 31868307  | 0.05 | 0.36 | 0.31 | FABP3      |
| Lung squamous cell carcinoma (H157) | 12 | 6221157   | 6351408   | 0.03 | 0.34 | 0.30 | CD9        |
| Lung squamous cell carcinoma (H157) | 17 | 48981354  | 49028680  | 0.06 | 0.36 | 0.30 | SPAG9      |
| Lung squamous cell carcinoma (H157) | 3  | 46731656  | 46739274  | 0.17 | 0.47 | 0.30 | ALS2CL     |
| Lung squamous cell carcinoma (H157) | 14 | 75724170  | 75782540  | 0.16 | 0.46 | 0.30 | FOS        |
| Lung squamous cell carcinoma (H157) | 3  | 125978012 | 126033776 | 0.04 | 0.33 | 0.29 | KLF15      |
| Lung squamous cell carcinoma (H157) | 17 | 72422406  | 72460049  | 0.19 | 0.47 | 0.28 | GPRC5C     |
| Lung squamous cell carcinoma (H157) | 15 | 68564041  | 68574856  | 0.24 | 0.52 | 0.28 | FEM1B      |
| Lung squamous cell carcinoma (H157) | 19 | 2567152   | 2637706   | 0.08 | 0.35 | 0.28 | GNG7       |
| Lung squamous cell carcinoma (H157) | 17 | 21178575  | 21194211  | 0.42 | 0.70 | 0.28 | MAP2K3     |
| Lung squamous cell carcinoma (H157) | 16 | 53534624  | 53554437  | 0.15 | 0.41 | 0.26 | AKTIP      |
| Lung squamous cell carcinoma (H157) | 11 | 72851228  | 72894684  | 0.09 | 0.36 | 0.26 | FCHSD2     |
| Lung squamous cell carcinoma (H157) | 4  | 89203835  | 89219912  | 0.17 | 0.43 | 0.26 | PPM1K      |
| Lung squamous cell carcinoma (H157) | 8  | 145021828 | 145029514 | 0.53 | 0.78 | 0.25 | PLEC       |
| Small cell lung cancer (H1672)      | 17 | 32547489  | 32583972  | 0.05 | 0.95 | 0.90 | CCL2       |
| Small cell lung cancer (H1672)      | 11 | 58938916  | 58992734  | 0.05 | 0.95 | 0.90 | MPEG1      |
| Small cell lung cancer (H1672)      | 14 | 23898802  | 23913794  | 0.00 | 0.89 | 0.89 | MYH7       |
| Small cell lung cancer (H1672)      | 16 | 88262997  | 88280525  | 0.07 | 0.94 | 0.88 | BANP       |
| Small cell lung cancer (H1672)      | 14 | 23870473  | 23890571  | 0.00 | 0.82 | 0.82 | MYH6       |

|                                |    |           |           |      |      |      |            |
|--------------------------------|----|-----------|-----------|------|------|------|------------|
| Small cell lung cancer (H1672) | 12 | 10862096  | 10876772  | 0.16 | 0.97 | 0.81 | CSDA       |
| Small cell lung cancer (H1672) | 1  | 145208293 | 145266278 | 0.07 | 0.87 | 0.80 | NOTCH2NL   |
| Small cell lung cancer (H1672) | 19 | 48218393  | 48248060  | 0.12 | 0.87 | 0.75 | EHD2       |
| Small cell lung cancer (H1672) | 7  | 100727881 | 100783471 | 0.09 | 0.84 | 0.74 | SERPINE1   |
| Small cell lung cancer (H1672) | 16 | 29259027  | 29284865  | 0.01 | 0.74 | 0.73 | SNX29P2    |
| Small cell lung cancer (H1672) | 11 | 44746277  | 44803353  | 0.04 | 0.77 | 0.72 | TSPAN18    |
| Small cell lung cancer (H1672) | 12 | 4377579   | 4414053   | 0.22 | 0.94 | 0.72 | CCND2      |
| Small cell lung cancer (H1672) | 19 | 2567152   | 2637706   | 0.08 | 0.78 | 0.71 | GNG7       |
| Small cell lung cancer (H1672) | 11 | 44584904  | 44654491  | 0.04 | 0.74 | 0.69 | CD82       |
| Small cell lung cancer (H1672) | X  | 64886373  | 64932289  | 0.26 | 0.96 | 0.69 | MSN        |
| Small cell lung cancer (H1672) | 18 | 19743086  | 19793872  | 0.19 | 0.88 | 0.69 | GATA6      |
| Small cell lung cancer (H1672) | 21 | 47373962  | 47413579  | 0.16 | 0.85 | 0.68 | COL6A1     |
| Small cell lung cancer (H1672) | 7  | 116138842 | 116200757 | 0.10 | 0.76 | 0.66 | CAV1       |
| Small cell lung cancer (H1672) | 19 | 6055959   | 6111185   | 0.10 | 0.70 | 0.60 | RFX2       |
| Small cell lung cancer (H1672) | 8  | 11532909  | 11620420  | 0.32 | 0.90 | 0.59 | C8orf49    |
| Small cell lung cancer (H1672) | 1  | 151960740 | 151974470 | 0.24 | 0.76 | 0.52 | S100A10    |
| Small cell lung cancer (H1672) | 10 | 46950950  | 46984234  | 0.12 | 0.63 | 0.52 | SYT15      |
| Small cell lung cancer (H1672) | 1  | 51433106  | 51444971  | 0.49 | 1.00 | 0.51 | CDKN2C     |
| Small cell lung cancer (H1672) | 21 | 46711726  | 46750687  | 0.07 | 0.57 | 0.50 | POFUT2     |
| Small cell lung cancer (H1672) | 21 | 46711726  | 46750687  | 0.07 | 0.57 | 0.50 | POFUT2     |
| Small cell lung cancer (H1672) | 21 | 46711726  | 46750687  | 0.07 | 0.57 | 0.50 | POFUT2     |
| Small cell lung cancer (H1672) | 2  | 241925890 | 241950654 | 0.12 | 0.61 | 0.49 | SNED1      |
| Small cell lung cancer (H1672) | 12 | 10364085  | 10373949  | 0.26 | 0.73 | 0.47 | GABARAPL1  |
| Small cell lung cancer (H1672) | 1  | 144923313 | 145010556 | 0.02 | 0.48 | 0.46 | AL590452.1 |
| Small cell lung cancer (H1672) | 16 | 3102086   | 3157272   | 0.10 | 0.56 | 0.46 | ZSCAN10    |
| Small cell lung cancer (H1672) | 19 | 18401834  | 18406232  | 0.52 | 0.97 | 0.45 | JUND       |
| Small cell lung cancer (H1672) | 16 | 86504285  | 86554076  | 0.52 | 0.96 | 0.45 | FOXF1      |
| Small cell lung cancer (H1672) | 11 | 62646517  | 62690197  | 0.11 | 0.55 | 0.44 | CHRM1      |
| Small cell lung cancer (H1672) | 19 | 45244285  | 45262369  | 0.46 | 0.89 | 0.43 | BCL3       |
| Small cell lung cancer (H1672) | 11 | 1770660   | 1805042   | 0.08 | 0.51 | 0.43 | CTSD       |
| Small cell lung cancer (H1672) | 19 | 2462980   | 2496458   | 0.29 | 0.70 | 0.42 | GADD45B    |
| Small cell lung cancer (H1672) | 19 | 33751162  | 33802757  | 0.14 | 0.55 | 0.41 | CEBPA      |
| Small cell lung cancer (H1672) | 3  | 46885844  | 46916759  | 0.08 | 0.48 | 0.40 | MYL3       |
| Small cell lung cancer (H1672) | 13 | 114821455 | 114835116 | 0.12 | 0.52 | 0.40 | RASA3      |
| Small cell lung cancer (H1672) | 7  | 143071647 | 143093995 | 0.11 | 0.51 | 0.40 | EPHA1      |
| Small cell lung cancer (H1672) | 13 | 110937717 | 111086117 | 0.06 | 0.46 | 0.40 | COL4A2     |
| Small cell lung cancer (H1672) | 22 | 37562253  | 37596293  | 0.18 | 0.56 | 0.38 | C1QTNF6    |
| Small cell lung cancer (H1672) | 17 | 81037486  | 81068828  | 0.21 | 0.59 | 0.38 | METRNL     |
| Small cell lung cancer (H1672) | 13 | 114863283 | 114898583 | 0.15 | 0.52 | 0.37 | RASA3      |

|                                |    |           |           |      |      |      |              |
|--------------------------------|----|-----------|-----------|------|------|------|--------------|
| Small cell lung cancer (H1672) | 12 | 53602263  | 53626034  | 0.27 | 0.62 | 0.36 | RARG         |
| Small cell lung cancer (H1672) | 11 | 6338518   | 6348300   | 0.22 | 0.56 | 0.34 | PRKCDBP      |
| Small cell lung cancer (H1672) | 16 | 88809516  | 88852538  | 0.11 | 0.43 | 0.32 | PIEZO1       |
| Small cell lung cancer (H1672) | 19 | 45347579  | 45383849  | 0.17 | 0.49 | 0.32 | PVRL2        |
| Small cell lung cancer (H1672) | 9  | 132161805 | 132179421 | 0.11 | 0.42 | 0.32 | NTMT1        |
| Small cell lung cancer (H1672) | 16 | 29165405  | 29212441  | 0.01 | 0.33 | 0.31 | SNX29P2      |
| Small cell lung cancer (H1672) | 1  | 2475405   | 2484449   | 0.45 | 0.76 | 0.31 | TNFRSF14     |
| Small cell lung cancer (H1672) | 10 | 134321138 | 134365757 | 0.10 | 0.41 | 0.31 | INPP5A       |
| Small cell lung cancer (H1672) | 6  | 139690764 | 139698884 | 0.53 | 0.84 | 0.31 | CITED2       |
| Small cell lung cancer (H1672) | 8  | 11663395  | 11764350  | 0.05 | 0.35 | 0.30 | CTSB         |
| Small cell lung cancer (H1672) | 10 | 17256938  | 17276860  | 0.22 | 0.52 | 0.30 | VIM          |
| Small cell lung cancer (H1672) | 20 | 24972518  | 25040392  | 0.09 | 0.39 | 0.30 | ACSS1        |
| Small cell lung cancer (H1672) | 6  | 30880966  | 30905424  | 0.07 | 0.37 | 0.30 | SFTA2        |
| Small cell lung cancer (H1672) | 22 | 39616903  | 39707444  | 0.13 | 0.42 | 0.29 | AL031590.1   |
| Small cell lung cancer (H1672) | 3  | 128718996 | 128746653 | 0.14 | 0.43 | 0.29 | EFCC1        |
| Small cell lung cancer (H1672) | 1  | 12192038  | 12247305  | 0.08 | 0.36 | 0.28 | TNFRSF1B     |
| Small cell lung cancer (H1672) | 13 | 110868117 | 110924162 | 0.03 | 0.30 | 0.27 | COL4A2       |
| Small cell lung cancer (H1672) | 13 | 111155320 | 111212932 | 0.02 | 0.29 | 0.27 | COL4A2       |
| Small cell lung cancer (H1672) | 3  | 9437015   | 9444925   | 0.71 | 0.97 | 0.26 | SETD5        |
| Small cell lung cancer (H1672) | 6  | 3053230   | 3070286   | 0.27 | 0.52 | 0.25 | RIPK1        |
| Primary colon tumor (Colon_P)  | 11 | 64654606  | 64662582  | 0.23 | 0.87 | 0.64 | EHD1         |
| Primary colon tumor (Colon_P)  | 11 | 34644271  | 34676099  | 0.09 | 0.70 | 0.61 | EHF          |
| Primary colon tumor (Colon_P)  | 17 | 75277484  | 75285351  | 0.20 | 0.78 | 0.57 | 9-Sep        |
| Primary colon tumor (Colon_P)  | 1  | 1092807   | 1104591   | 0.35 | 0.90 | 0.56 | TTLL10       |
| Primary colon tumor (Colon_P)  | 12 | 6478956   | 6487347   | 0.24 | 0.78 | 0.54 | LTBR         |
| Primary colon tumor (Colon_P)  | 19 | 35605339  | 35613006  | 0.23 | 0.76 | 0.53 | FXYD3        |
| Primary colon tumor (Colon_P)  | 1  | 207111967 | 207121081 | 0.23 | 0.74 | 0.51 | PIGR         |
| Primary colon tumor (Colon_P)  | 17 | 46021666  | 46045798  | 0.16 | 0.64 | 0.48 | CDK5RAP3     |
| Primary colon tumor (Colon_P)  | 9  | 140082154 | 140094655 | 0.20 | 0.67 | 0.47 | TPRN         |
| Primary colon tumor (Colon_P)  | 1  | 153579813 | 153590695 | 0.05 | 0.52 | 0.47 | S100A14      |
| Primary colon tumor (Colon_P)  | 1  | 234949066 | 234963582 | 0.06 | 0.52 | 0.46 | IRF2BP2      |
| Primary colon tumor (Colon_P)  | 1  | 234949066 | 234963582 | 0.06 | 0.52 | 0.46 | IRF2BP2      |
| Primary colon tumor (Colon_P)  | 11 | 72485443  | 72499721  | 0.10 | 0.56 | 0.46 | STARD10      |
| Primary colon tumor (Colon_P)  | 1  | 155900806 | 155917642 | 0.20 | 0.63 | 0.44 | RXFP4        |
| Primary colon tumor (Colon_P)  | 16 | 70091792  | 70101175  | 0.34 | 0.75 | 0.41 | RP11-419C5.2 |
| Primary colon tumor (Colon_P)  | 15 | 40634401  | 40644052  | 0.05 | 0.44 | 0.39 | PHGR1        |
| Primary colon tumor (Colon_P)  | 22 | 37406895  | 37441393  | 0.08 | 0.47 | 0.39 | MPST         |
| Primary colon tumor (Colon_P)  | 17 | 56404613  | 56418558  | 0.34 | 0.73 | 0.38 | BZRAP1       |
| Primary colon tumor (Colon_P)  | 8  | 145725241 | 145730866 | 0.32 | 0.70 | 0.38 | GPT          |

|                                    |    |           |           |      |      |      |              |
|------------------------------------|----|-----------|-----------|------|------|------|--------------|
| Primary colon tumor (Colon_P)      | 1  | 167049094 | 167060421 | 0.09 | 0.46 | 0.38 | GPA33        |
| Primary colon tumor (Colon_P)      | 10 | 3816041   | 3829259   | 0.31 | 0.68 | 0.38 | KLF6         |
| Primary colon tumor (Colon_P)      | 21 | 43876507  | 43895539  | 0.03 | 0.39 | 0.37 | SLC37A1      |
| Primary colon tumor (Colon_P)      | 1  | 3369826   | 3378616   | 0.30 | 0.66 | 0.37 | ARHGEF16     |
| Primary colon tumor (Colon_P)      | 22 | 46479313  | 46489352  | 0.06 | 0.43 | 0.36 | FLJ27365     |
| Primary colon tumor (Colon_P)      | 7  | 130570945 | 130647038 | 0.16 | 0.51 | 0.36 | MKLN1        |
| Primary colon tumor (Colon_P)      | 1  | 202072763 | 202088434 | 0.10 | 0.43 | 0.33 | GPR37L1      |
| Primary colon tumor (Colon_P)      | 17 | 7161661   | 7168259   | 0.63 | 0.95 | 0.32 | CLDN7        |
| Primary colon tumor (Colon_P)      | 16 | 31137728  | 31147935  | 0.17 | 0.47 | 0.31 | PRSS8        |
| Primary colon tumor (Colon_P)      | 1  | 46632072  | 46655214  | 0.08 | 0.38 | 0.30 | TSPAN1       |
| Primary colon tumor (Colon_P)      | 20 | 62312602  | 62332044  | 0.16 | 0.45 | 0.29 | TNFRSF6B     |
| Primary colon tumor (Colon_P)      | 19 | 49115902  | 49124026  | 0.39 | 0.67 | 0.29 | SPHK2        |
| Primary colon tumor (Colon_P)      | 15 | 45726853  | 45749919  | 0.09 | 0.38 | 0.29 | C15orf48     |
| Primary colon tumor (Colon_P)      | 2  | 173291273 | 173330716 | 0.25 | 0.53 | 0.28 | ITGA6        |
| Primary colon tumor (Colon_P)      | 20 | 62153361  | 62177846  | 0.18 | 0.46 | 0.28 | PTK6         |
| Primary colon tumor (Colon_P)      | 2  | 200306225 | 200342782 | 0.56 | 0.84 | 0.28 | SATB2        |
| Primary colon tumor (Colon_P)      | 20 | 25200574  | 25236386  | 0.08 | 0.36 | 0.28 | PYGB         |
| Primary colon tumor (Colon_P)      | 21 | 40159118  | 40212366  | 0.18 | 0.44 | 0.27 | ETS2         |
| Primary colon tumor (Colon_P)      | 1  | 226052374 | 226087213 | 0.19 | 0.46 | 0.27 | LEFTY1       |
| Primary colon tumor (Colon_P)      | 3  | 58642829  | 58682800  | 0.06 | 0.32 | 0.26 | FAM3D        |
| Primary colon tumor (Colon_P)      | 16 | 574288    | 586492    | 0.27 | 0.52 | 0.26 | SOLH         |
| Primary colon tumor (Colon_P)      | 4  | 6747543   | 6755479   | 0.18 | 0.44 | 0.26 | KIAA0232     |
| Primary colon tumor (Colon_P)      | 14 | 50465553  | 50471375  | 0.66 | 0.92 | 0.25 | C14orf182    |
| Primary colon metastasis (Colon_M) | 15 | 40634401  | 40644052  | 0.05 | 0.73 | 0.67 | PHGR1        |
| Primary colon metastasis (Colon_M) | 11 | 64654606  | 64662582  | 0.23 | 0.87 | 0.64 | EHD1         |
| Primary colon metastasis (Colon_M) | 16 | 70091792  | 70101175  | 0.34 | 0.96 | 0.61 | RP11-419C5.2 |
| Primary colon metastasis (Colon_M) | 17 | 75277484  | 75285351  | 0.20 | 0.80 | 0.60 | 9-Sep        |
| Primary colon metastasis (Colon_M) | 11 | 34644271  | 34676099  | 0.09 | 0.64 | 0.55 | EHF          |
| Primary colon metastasis (Colon_M) | 17 | 56404613  | 56418558  | 0.34 | 0.87 | 0.53 | BZRAP1       |
| Primary colon metastasis (Colon_M) | 7  | 130570945 | 130647038 | 0.16 | 0.66 | 0.51 | MKLN1        |
| Primary colon metastasis (Colon_M) | 7  | 50410776  | 50436416  | 0.00 | 0.49 | 0.49 | IKZF1        |
| Primary colon metastasis (Colon_M) | 9  | 140082154 | 140094655 | 0.20 | 0.68 | 0.49 | TPRN         |
| Primary colon metastasis (Colon_M) | 1  | 153579813 | 153590695 | 0.05 | 0.53 | 0.49 | S100A14      |
| Primary colon metastasis (Colon_M) | 11 | 72485443  | 72499721  | 0.10 | 0.57 | 0.47 | STARD10      |
| Primary colon metastasis (Colon_M) | 1  | 234949066 | 234963582 | 0.06 | 0.50 | 0.45 | IRF2BP2      |
| Primary colon metastasis (Colon_M) | 1  | 234949066 | 234963582 | 0.06 | 0.50 | 0.45 | IRF2BP2      |
| Primary colon metastasis (Colon_M) | 10 | 3816041   | 3829259   | 0.31 | 0.75 | 0.44 | KLF6         |
| Primary colon metastasis (Colon_M) | 16 | 637814    | 644973    | 0.45 | 0.89 | 0.44 | RAB40C       |
| Primary colon metastasis (Colon_M) | 5  | 169688532 | 169740245 | 0.01 | 0.45 | 0.43 | LCP2         |

|                                    |    |           |           |      |      |      |           |
|------------------------------------|----|-----------|-----------|------|------|------|-----------|
| Primary colon metastasis (Colon_M) | 22 | 46479313  | 46489352  | 0.06 | 0.49 | 0.42 | FLJ27365  |
| Primary colon metastasis (Colon_M) | 1  | 155900806 | 155917642 | 0.20 | 0.62 | 0.42 | RXFP4     |
| Primary colon metastasis (Colon_M) | 4  | 6747543   | 6755479   | 0.18 | 0.60 | 0.41 | KIAA0232  |
| Primary colon metastasis (Colon_M) | 1  | 1092807   | 1104591   | 0.35 | 0.75 | 0.41 | TTLL10    |
| Primary colon metastasis (Colon_M) | 7  | 142493655 | 142510845 | 0.11 | 0.51 | 0.40 | PRSS1     |
| Primary colon metastasis (Colon_M) | 1  | 3369826   | 3378616   | 0.30 | 0.69 | 0.39 | ARHGEF16  |
| Primary colon metastasis (Colon_M) | 7  | 50345823  | 50370722  | 0.06 | 0.45 | 0.39 | IKZF1     |
| Primary colon metastasis (Colon_M) | 2  | 219149842 | 219160653 | 0.44 | 0.82 | 0.38 | TMBIM1    |
| Primary colon metastasis (Colon_M) | 1  | 202072763 | 202088434 | 0.10 | 0.47 | 0.37 | GPR37L1   |
| Primary colon metastasis (Colon_M) | 3  | 156836974 | 156855523 | 0.13 | 0.49 | 0.36 | CCNL1     |
| Primary colon metastasis (Colon_M) | 8  | 145725241 | 145730866 | 0.32 | 0.68 | 0.35 | GPT       |
| Primary colon metastasis (Colon_M) | 16 | 31137728  | 31147935  | 0.17 | 0.51 | 0.35 | PRSS8     |
| Primary colon metastasis (Colon_M) | 13 | 27523605  | 27558934  | 0.13 | 0.47 | 0.34 | USP12     |
| Primary colon metastasis (Colon_M) | 17 | 46021666  | 46045798  | 0.16 | 0.50 | 0.34 | CDK5RAP3  |
| Primary colon metastasis (Colon_M) | 6  | 41031558  | 41042616  | 0.34 | 0.67 | 0.33 | NFYA      |
| Primary colon metastasis (Colon_M) | 1  | 113240401 | 113250840 | 0.29 | 0.62 | 0.32 | RHOC      |
| Primary colon metastasis (Colon_M) | 18 | 72918561  | 72932349  | 0.40 | 0.72 | 0.32 | TSHZ1     |
| Primary colon metastasis (Colon_M) | 17 | 7161661   | 7168259   | 0.63 | 0.94 | 0.31 | CLDN7     |
| Primary colon metastasis (Colon_M) | 3  | 9938065   | 9959891   | 0.17 | 0.47 | 0.31 | IL17RC    |
| Primary colon metastasis (Colon_M) | 17 | 81030950  | 81060926  | 0.29 | 0.59 | 0.30 | METRNL    |
| Primary colon metastasis (Colon_M) | 2  | 200306225 | 200342782 | 0.56 | 0.86 | 0.30 | SATB2     |
| Primary colon metastasis (Colon_M) | 19 | 49115902  | 49124026  | 0.39 | 0.68 | 0.30 | SPHK2     |
| Primary colon metastasis (Colon_M) | 1  | 211499374 | 211527884 | 0.09 | 0.38 | 0.30 | TRAF5     |
| Primary colon metastasis (Colon_M) | 12 | 6478956   | 6487347   | 0.24 | 0.53 | 0.29 | LTBR      |
| Primary colon metastasis (Colon_M) | 12 | 89739271  | 89785574  | 0.15 | 0.44 | 0.29 | DUSP6     |
| Primary colon metastasis (Colon_M) | 20 | 62312602  | 62332044  | 0.16 | 0.45 | 0.29 | TNFRSF6B  |
| Primary colon metastasis (Colon_M) | 11 | 307666    | 312937    | 0.70 | 0.98 | 0.28 | IFITM2    |
| Primary colon metastasis (Colon_M) | 5  | 175959707 | 175981606 | 0.36 | 0.64 | 0.28 | CDHR2     |
| Primary colon metastasis (Colon_M) | 21 | 43876507  | 43895539  | 0.03 | 0.31 | 0.28 | SLC37A1   |
| Primary colon metastasis (Colon_M) | 19 | 54970768  | 54983186  | 0.35 | 0.63 | 0.28 | LENG9     |
| Primary colon metastasis (Colon_M) | 1  | 226052374 | 226087213 | 0.19 | 0.47 | 0.27 | LEFTY1    |
| Primary colon metastasis (Colon_M) | 15 | 31546396  | 31565926  | 0.03 | 0.31 | 0.27 | KLF13     |
| Primary colon metastasis (Colon_M) | 14 | 55558308  | 55599128  | 0.10 | 0.37 | 0.27 | LGALS3    |
| Primary colon metastasis (Colon_M) | 2  | 145252863 | 145282644 | 0.47 | 0.74 | 0.27 | ZEB2      |
| Primary colon metastasis (Colon_M) | 1  | 46632072  | 46655214  | 0.08 | 0.34 | 0.26 | TSPAN1    |
| Primary colon metastasis (Colon_M) | 15 | 63333068  | 63347067  | 0.46 | 0.71 | 0.26 | TPM1      |
| Primary colon metastasis (Colon_M) | 15 | 45726853  | 45749919  | 0.09 | 0.35 | 0.26 | C15orf48  |
| Primary colon metastasis (Colon_M) | 11 | 1865282   | 1903941   | 0.12 | 0.38 | 0.26 | LSP1      |
| Primary colon metastasis (Colon_M) | 14 | 50465553  | 50471375  | 0.66 | 0.92 | 0.25 | C14orf182 |

|                                    |    |           |           |      |      |      |         |
|------------------------------------|----|-----------|-----------|------|------|------|---------|
| Primary colon metastasis (Colon_M) | 22 | 37406895  | 37441393  | 0.08 | 0.33 | 0.25 | MPST    |
| Primary colon metastasis (Colon_M) | 2  | 47563284  | 47609335  | 0.08 | 0.33 | 0.25 | EPCAM   |
| Primary colon metastasis (Colon_M) | 17 | 76402998  | 76414113  | 0.00 | 0.25 | 0.25 | PGS1    |
| Glioblastoma (U87MG)               | 15 | 77985239  | 78036242  | 0.02 | 1.00 | 0.98 | LINGO1  |
| Glioblastoma (U87MG)               | 1  | 112417478 | 112468665 | 0.03 | 1.00 | 0.97 | KCND3   |
| Glioblastoma (U87MG)               | 17 | 9811786   | 9891020   | 0.02 | 0.99 | 0.97 | GAS7    |
| Glioblastoma (U87MG)               | 11 | 89364627  | 89408904  | 0.00 | 0.97 | 0.97 | NOX4    |
| Glioblastoma (U87MG)               | 4  | 16653926  | 16697144  | 0.00 | 0.97 | 0.96 | LDB2    |
| Glioblastoma (U87MG)               | 11 | 7592529   | 7626823   | 0.06 | 1.00 | 0.94 | PPFIBP2 |
| Glioblastoma (U87MG)               | 9  | 19549453  | 19728789  | 0.03 | 0.97 | 0.94 | SLC24A2 |
| Glioblastoma (U87MG)               | 9  | 19549453  | 19728789  | 0.03 | 0.97 | 0.94 | SLC24A2 |
| Glioblastoma (U87MG)               | 6  | 97413825  | 97477513  | 0.03 | 0.96 | 0.93 | KLHL32  |
| Glioblastoma (U87MG)               | 17 | 9903813   | 9965252   | 0.05 | 0.98 | 0.93 | GAS7    |
| Glioblastoma (U87MG)               | 2  | 21473055  | 21505937  | 0.06 | 0.99 | 0.93 | TDRD15  |
| Glioblastoma (U87MG)               | 3  | 35676346  | 35724308  | 0.05 | 0.97 | 0.92 | ARPP21  |
| Glioblastoma (U87MG)               | 15 | 32065846  | 32164147  | 0.06 | 0.98 | 0.91 | OTUD7A  |
| Glioblastoma (U87MG)               | 11 | 119942989 | 119964740 | 0.06 | 0.97 | 0.91 | TRIM29  |
| Glioblastoma (U87MG)               | 9  | 137967864 | 138040365 | 0.09 | 0.99 | 0.90 | OLFM1   |
| Glioblastoma (U87MG)               | 4  | 7342499   | 7398832   | 0.09 | 0.99 | 0.90 | SORCS2  |
| Glioblastoma (U87MG)               | 10 | 1224882   | 1259633   | 0.08 | 0.97 | 0.89 | ADARB2  |
| Glioblastoma (U87MG)               | 11 | 83518536  | 83549646  | 0.00 | 0.89 | 0.89 | DLG2    |
| Glioblastoma (U87MG)               | 20 | 58177200  | 58286056  | 0.10 | 0.99 | 0.89 | PHACTR3 |
| Glioblastoma (U87MG)               | 7  | 154558028 | 154588504 | 0.08 | 0.97 | 0.89 | DPP6    |
| Glioblastoma (U87MG)               | 8  | 143575390 | 143626966 | 0.10 | 0.97 | 0.88 | BAI1    |
| Glioblastoma (U87MG)               | 11 | 49190901  | 49236799  | 0.04 | 0.92 | 0.88 | FOLH1   |
| Glioblastoma (U87MG)               | 5  | 175104513 | 175139823 | 0.03 | 0.90 | 0.88 | HRH2    |
| Glioblastoma (U87MG)               | 19 | 57200811  | 57239668  | 0.06 | 0.93 | 0.87 | ZNF835  |
| Glioblastoma (U87MG)               | 11 | 7650333   | 7699694   | 0.06 | 0.93 | 0.87 | CYB5R2  |
| Glioblastoma (U87MG)               | 1  | 110693399 | 110756870 | 0.07 | 0.94 | 0.87 | KCNC4   |
| Glioblastoma (U87MG)               | 11 | 117399960 | 117681020 | 0.12 | 0.99 | 0.87 | DSCAML1 |
| Glioblastoma (U87MG)               | 1  | 111123465 | 111163650 | 0.13 | 1.00 | 0.87 | KCNA2   |
| Glioblastoma (U87MG)               | 1  | 4712562   | 4775202   | 0.12 | 0.99 | 0.87 | AJAP1   |
| Glioblastoma (U87MG)               | 11 | 83939015  | 84004173  | 0.03 | 0.89 | 0.86 | DLG2    |
| Glioblastoma (U87MG)               | 4  | 42605460  | 42661658  | 0.12 | 0.98 | 0.86 | ATP8A1  |
| Glioblastoma (U87MG)               | 4  | 6440647   | 6473745   | 0.14 | 1.00 | 0.86 | PPP2R2C |
| Glioblastoma (U87MG)               | 11 | 119843908 | 119906650 | 0.11 | 0.97 | 0.86 | TRIM29  |
| Glioblastoma (U87MG)               | 4  | 7296865   | 7329947   | 0.06 | 0.91 | 0.85 | SORCS2  |
| Glioblastoma (U87MG)               | 4  | 7296865   | 7329947   | 0.06 | 0.91 | 0.85 | SORCS2  |
| Glioblastoma (U87MG)               | 11 | 117721606 | 117754344 | 0.17 | 1.00 | 0.83 | FXYD6   |



|                      |    |           |           |      |      |      |            |
|----------------------|----|-----------|-----------|------|------|------|------------|
| Glioblastoma (U87MG) | 20 | 37432328  | 37531273  | 0.11 | 0.94 | 0.82 | PPP1R16B   |
| Glioblastoma (U87MG) | 5  | 743055    | 802933    | 0.08 | 0.90 | 0.82 | ZDHHC11B   |
| Glioblastoma (U87MG) | 11 | 64379909  | 64428733  | 0.07 | 0.89 | 0.82 | NRXN2      |
| Glioblastoma (U87MG) | 11 | 133874209 | 133916196 | 0.12 | 0.93 | 0.81 | JAM3       |
| Glioblastoma (U87MG) | 11 | 133874209 | 133916196 | 0.12 | 0.93 | 0.81 | JAM3       |
| Glioblastoma (U87MG) | 6  | 97344914  | 97390757  | 0.16 | 0.96 | 0.80 | KLHL32     |
| Glioblastoma (U87MG) | 11 | 114090121 | 114132225 | 0.07 | 0.86 | 0.80 | NNMT       |
| Glioblastoma (U87MG) | 7  | 51292392  | 51394212  | 0.18 | 0.97 | 0.80 | COBL       |
| Glioblastoma (U87MG) | 2  | 60731415  | 60797670  | 0.15 | 0.95 | 0.80 | BCL11A     |
| Glioblastoma (U87MG) | 19 | 29973373  | 30022034  | 0.17 | 0.96 | 0.79 | VSTM2B     |
| Glioblastoma (U87MG) | 3  | 118677505 | 118754932 | 0.10 | 0.89 | 0.79 | IGSF11     |
| Glioblastoma (U87MG) | 9  | 19747340  | 19790384  | 0.15 | 0.94 | 0.78 | SLC24A2    |
| Glioblastoma (U87MG) | 11 | 131430276 | 131505034 | 0.15 | 0.92 | 0.78 | NTM        |
| Glioblastoma (U87MG) | 13 | 113650879 | 113757822 | 0.08 | 0.85 | 0.77 | AL137002.1 |
| Glioblastoma (U87MG) | 15 | 77895466  | 77967694  | 0.09 | 0.84 | 0.75 | LINGO1     |
| Glioblastoma (U87MG) | 17 | 72226877  | 72248627  | 0.23 | 0.98 | 0.75 | TTYH2      |
| Glioblastoma (U87MG) | 1  | 160019557 | 160042341 | 0.23 | 0.98 | 0.75 | KCNJ10     |
| Glioblastoma (U87MG) | 9  | 8840393   | 8880342   | 0.24 | 0.98 | 0.74 | PTPRD      |
| Glioblastoma (U87MG) | 9  | 19457142  | 19518307  | 0.09 | 0.83 | 0.74 | ACER2      |
| Glioblastoma (U87MG) | 20 | 45187487  | 45213480  | 0.22 | 0.96 | 0.74 | SLC13A3    |
| Glioblastoma (U87MG) | 8  | 9753618   | 9790735   | 0.15 | 0.89 | 0.74 | MSRA       |
| Glioblastoma (U87MG) | 11 | 113926954 | 114070258 | 0.08 | 0.81 | 0.73 | ZBTB16     |
| Glioblastoma (U87MG) | 11 | 134254603 | 134298147 | 0.26 | 0.99 | 0.73 | B3GAT1     |
| Glioblastoma (U87MG) | 13 | 25710619  | 25792315  | 0.15 | 0.86 | 0.71 | AMER2      |
| Glioblastoma (U87MG) | 4  | 36164927  | 36295153  | 0.11 | 0.82 | 0.71 | DTHD1      |
| Glioblastoma (U87MG) | 3  | 11024732  | 11080079  | 0.23 | 0.94 | 0.71 | SLC6A1     |
| Glioblastoma (U87MG) | 11 | 64441886  | 64486253  | 0.13 | 0.83 | 0.70 | NRXN2      |
| Glioblastoma (U87MG) | 8  | 27089725  | 27139876  | 0.09 | 0.77 | 0.67 | STMN4      |
| Glioblastoma (U87MG) | 5  | 141125726 | 141169237 | 0.03 | 0.70 | 0.67 | ARAP3      |
| Glioblastoma (U87MG) | 6  | 166689003 | 166721330 | 0.20 | 0.87 | 0.67 | PRR18      |
| Glioblastoma (U87MG) | 10 | 88016137  | 88053122  | 0.07 | 0.73 | 0.66 | GRID1      |
| Glioblastoma (U87MG) | 8  | 143531641 | 143555608 | 0.30 | 0.96 | 0.65 | BAI1       |
| Glioblastoma (U87MG) | 12 | 110034532 | 110070399 | 0.16 | 0.81 | 0.65 | MVK        |
| Glioblastoma (U87MG) | 16 | 934803    | 971974    | 0.12 | 0.76 | 0.64 | LMF1       |
| Glioblastoma (U87MG) | 10 | 88108134  | 88126246  | 0.29 | 0.94 | 0.64 | GRID1      |
| Glioblastoma (U87MG) | 16 | 5005930   | 5093187   | 0.14 | 0.77 | 0.63 | ALG1       |
| Glioblastoma (U87MG) | 10 | 98094383  | 98136176  | 0.18 | 0.80 | 0.62 | OPALIN     |
| Glioblastoma (U87MG) | 16 | 1064221   | 1098971   | 0.24 | 0.85 | 0.61 | SSTR5      |
| Glioblastoma (U87MG) | 17 | 3402742   | 3440702   | 0.12 | 0.70 | 0.58 | TRPV3      |

|                      |    |           |           |      |      |      |         |
|----------------------|----|-----------|-----------|------|------|------|---------|
| Glioblastoma (U87MG) | 1  | 204796255 | 204866707 | 0.21 | 0.79 | 0.58 | NFASC   |
| Glioblastoma (U87MG) | 2  | 105022517 | 105068208 | 0.24 | 0.82 | 0.58 | POU3F3  |
| Glioblastoma (U87MG) | 19 | 31043362  | 31082430  | 0.06 | 0.62 | 0.56 | ZNF536  |
| Glioblastoma (U87MG) | 19 | 51033029  | 51070726  | 0.30 | 0.86 | 0.56 | LRRC4B  |
| Glioblastoma (U87MG) | 3  | 39487852  | 39573984  | 0.34 | 0.88 | 0.54 | MOBP    |
| Glioblastoma (U87MG) | 17 | 26265479  | 26324131  | 0.04 | 0.57 | 0.54 | LYRM9   |
| Glioblastoma (U87MG) | 7  | 86272604  | 86301105  | 0.22 | 0.75 | 0.53 | GRM3    |
| Glioblastoma (U87MG) | 3  | 10505723  | 10550300  | 0.05 | 0.56 | 0.51 | ATP2B2  |
| Glioblastoma (U87MG) | 20 | 24441648  | 24488844  | 0.15 | 0.66 | 0.51 | SYNDIG1 |
| Glioblastoma (U87MG) | 6  | 110640550 | 110689914 | 0.02 | 0.53 | 0.51 | METTL24 |
| Glioblastoma (U87MG) | 21 | 43639119  | 43683392  | 0.22 | 0.71 | 0.49 | ABCG1   |
| Glioblastoma (U87MG) | 15 | 89891804  | 89952836  | 0.35 | 0.82 | 0.47 | POLG    |
| Glioblastoma (U87MG) | 6  | 69337682  | 69367340  | 0.33 | 0.79 | 0.46 | BAI3    |
| Glioblastoma (U87MG) | 1  | 175825389 | 175858645 | 0.12 | 0.57 | 0.45 | RFWD2   |
| Glioblastoma (U87MG) | 11 | 72284488  | 72365197  | 0.06 | 0.49 | 0.43 | PDE2A   |
| Glioblastoma (U87MG) | 11 | 1405512   | 1442659   | 0.20 | 0.63 | 0.43 | BRSK2   |
| Glioblastoma (U87MG) | 3  | 133460192 | 133484110 | 0.24 | 0.67 | 0.42 | TF      |
| Glioblastoma (U87MG) | 1  | 156353833 | 156405678 | 0.29 | 0.70 | 0.41 | C1orf61 |
| Glioblastoma (U87MG) | 15 | 45655307  | 45688573  | 0.24 | 0.65 | 0.41 | GATM    |
| Glioblastoma (U87MG) | 14 | 78431807  | 78458522  | 0.14 | 0.54 | 0.41 | ADCK1   |
| Glioblastoma (U87MG) | 1  | 204888687 | 205049666 | 0.13 | 0.51 | 0.38 | CNTN2   |
| Glioblastoma (U87MG) | 2  | 164566271 | 164594418 | 0.35 | 0.72 | 0.36 | FIGN    |
| Glioblastoma (U87MG) | X  | 103025990 | 103049724 | 0.64 | 1.00 | 0.36 | PLP1    |
| Glioblastoma (U87MG) | 1  | 200978848 | 201012524 | 0.14 | 0.49 | 0.35 | KIF21B  |
| Glioblastoma (U87MG) | 12 | 113534226 | 113581503 | 0.11 | 0.46 | 0.35 | RASAL1  |
| Glioblastoma (U87MG) | 11 | 131522182 | 131565052 | 0.19 | 0.53 | 0.34 | NTM     |
| Glioblastoma (U87MG) | 8  | 53318133  | 53342376  | 0.29 | 0.62 | 0.34 | ST18    |
| Glioblastoma (U87MG) | 13 | 113365298 | 113413184 | 0.12 | 0.45 | 0.33 | ATP11A  |
| Glioblastoma (U87MG) | 7  | 37232585  | 37330045  | 0.11 | 0.44 | 0.32 | ELMO1   |
| Glioblastoma (U87MG) | 4  | 17510272  | 17521459  | 0.21 | 0.53 | 0.32 | CLRN2   |
| Glioblastoma (U87MG) | 8  | 65275409  | 65295224  | 0.24 | 0.55 | 0.31 | BHLHE22 |
| Glioblastoma (U87MG) | 15 | 84214391  | 84255934  | 0.08 | 0.38 | 0.30 | SH3GL3  |
| Glioblastoma (U87MG) | 3  | 42724031  | 42791782  | 0.06 | 0.36 | 0.30 | CCDC13  |
| Glioblastoma (U87MG) | 1  | 20755054  | 20821566  | 0.19 | 0.48 | 0.30 | CAMK2N1 |
| Glioblastoma (U87MG) | 21 | 34399873  | 34453980  | 0.28 | 0.57 | 0.29 | OLIG1   |
| Glioblastoma (U87MG) | 11 | 133987173 | 134023589 | 0.17 | 0.46 | 0.28 | JAM3    |
| Glioblastoma (U87MG) | 19 | 50985631  | 51019282  | 0.28 | 0.53 | 0.25 | ASPDH   |

**Supplementary Table 6:** GO enrichment analysis of hypermethylated super-enhancers (GOTERM\_BP\_5, p<0.01).

| <b>GO term</b>                                                                      | <b># genes</b> | <b>% genes</b> | <b>Enrichment</b> | <b>p-value*</b> | <b>Sample**</b> |
|-------------------------------------------------------------------------------------|----------------|----------------|-------------------|-----------------|-----------------|
| Regulation of gene expression                                                       | 16             | 57,1           | 3,6               | 8,7E-6          | 468PT           |
| Regulation of transcription                                                         | 16             | 57,1           | 4,0               | 9,1E-6          | 468PT           |
| Regulation of macromolecule biosynthetic process                                    | 16             | 57,1           | 3,7               | 1,0E-5          | 468PT           |
| Regulation of cellular biosynthetic process                                         | 16             | 57,1           | 3,5               | 1,1E-5          | 468PT           |
| Regulation of nucleobase, nucleoside, nucleotide and nucleic acid metabolic process | 16             | 57,1           | 3,7               | 1,4E-5          | 468PT           |
| Regulation of transcription, DNA-dependent                                          | 13             | 46,4           | 4,7               | 3,0E-5          | 468PT           |
| Regulation of RNA metabolic process                                                 | 13             | 46,4           | 4,6               | 3,3E-5          | 468PT           |
| Regulation of RNA metabolic process                                                 | 18             | 35,3           | 3,4               | 6,1E-4          | 468LN           |
| Vasculature development                                                             | 8              | 15,7           | 10,9              | 7,9E-4          | 468LN           |
| Regulation of transcription, DNA-dependent                                          | 18             | 35,3           | 3,5               | 8,9E-4          | 468LN           |
| Blood vessel development                                                            | 8              | 15,7           | 11,1              | 9,0E-4          | 468LN           |
| Blood vessel morphogenesis                                                          | 7              | 13,7           | 11,3              | 2,9E-3          | 468LN           |
| Gland development                                                                   | 6              | 11,8           | 15,2              | 3,0E-3          | 468LN           |
| Chordate embryonic development                                                      | 8              | 15,7           | 8,3               | 3,2E-3          | 468LN           |
| Angiogenesis                                                                        | 6              | 11,8           | 13,8              | 4,0E-3          | 468LN           |
| Regulation of transcription                                                         | 19             | 37,3           | 2,5               | 4,6E-3          | 468LN           |
| Regulation of cellular biosynthetic process                                         | 20             | 39,2           | 2,3               | 6,0E-3          | 468LN           |
| Regulation of gene expression                                                       | 16             | 76,2           | 3,6               | 6,5E-6          | H157            |
| Regulation of transcription                                                         | 16             | 76,2           | 4,0               | 6,8E-6          | H157            |
| Regulation of macromolecule biosynthetic process                                    | 16             | 76,2           | 3,7               | 7,6E-6          | H157            |
| Regulation of cellular biosynthetic process                                         | 16             | 76,2           | 3,5               | 8,1E-6          | H157            |
| Regulation of nucleobase, nucleoside, nucleotide and nucleic acid metabolic process | 16             | 76,2           | 3,7               | 1,0E-5          | H157            |
| Regulation of transcription, DNA-dependent                                          | 12             | 57,1           | 4,4               | 2,4E-4          | H157            |
| Regulation of RNA metabolic process                                                 | 12             | 57,1           | 4,3               | 2,5E-4          | H157            |
| Regulation of transcription                                                         | 19             | 51,4           | 3,1               | 3,1E-4          | H1672           |
| Regulation of gene expression                                                       | 19             | 51,4           | 2,8               | 3,2E-4          | H1672           |
| Regulation of transcription, DNA-dependent                                          | 15             | 40,5           | 3,6               | 3,4E-4          | H1672           |
| Positive Regulation of RNA metabolic process                                        | 9              | 24,3           | 7,9               | 3,6E-4          | H1672           |
| Regulation of macromolecule biosynthetic process                                    | 19             | 51,4           | 2,8               | 3,8E-4          | H1672           |
| Positive Regulation of transcription, DNA-dependent                                 | 9              | 24,3           | 8,0               | 3,9E-4          | H1672           |
| Regulation of RNA metabolic process                                                 | 15             | 40,5           | 3,5               | 3,9E-4          | H1672           |
| Regulation of cellular biosynthetic process                                         | 19             | 51,4           | 2,7               | 4,2E-4          | H1672           |
| Regulation of nucleobase, nucleoside, nucleotide and nucleic acid metabolic process | 19             | 51,4           | 2,9               | 5,2E-4          | H1672           |
| Positive Regulation of transcription                                                | 9              | 24,3           | 6,8               | 8,0E-4          | H1672           |
| Positive Regulation of gene expression                                              | 9              | 24,3           | 6,6               | 9,0E-4          | H1672           |

|                                                                                              |   |      |      |        |       |
|----------------------------------------------------------------------------------------------|---|------|------|--------|-------|
| Positive Regulation of nucleobase, nucleoside, nucleotide and nucleic acid metabolic process | 9 | 24,3 | 6,1  | 1,4E-3 | H1672 |
| Positive Regulation of nitrogen compound metabolic process                                   | 9 | 24,3 | 5,9  | 1,6E-3 | H1672 |
| Positive Regulation of macromolecule biosynthetic process                                    | 9 | 24,3 | 5,8  | 1,6E-3 | H1672 |
| Positive Regulation of cellular biosynthetic process                                         | 9 | 24,3 | 5,6  | 2,1E-3 | H1672 |
| Positive Regulation of biosynthetic process                                                  | 9 | 24,3 | 5,5  | 2,2E-3 | H1672 |
| Regulation of striated muscle tissue development                                             | 4 | 10,8 | 33,9 | 3,5E-3 | H1672 |
| Positive Regulation of macromolecule metabolic process                                       | 9 | 24,3 | 4,5  | 8,2E-3 | H1672 |
| Tissue development                                                                           | 8 | 21,6 | 5,1  | 8,8E-3 | H1672 |
| Positive Regulation of cellular metabolic process                                            | 9 | 24,3 | 4,3  | 9,3E-3 | H1672 |

\* Bonferroni corrected

\*\* Only samples with significantly enriched GO terms

**Supplementary Table 7:** Validation of hypermethylated super-enhancers in cancer samples (HumanMethylation450 BeadChip) .

| Cancer type       | Super-enhancer ID               | Gene       | Chr. | Start     | End       | Validation set |          | WGBS         | CNV      |
|-------------------|---------------------------------|------------|------|-----------|-----------|----------------|----------|--------------|----------|
|                   |                                 |            |      |           |           | $\delta$ AVR   | FDR      | $\delta$ HMR | FDR      |
| Breast cancer     | 1_MACS_peak_2257_lociStitched   | CKS1B      | 1    | 154941228 | 154949531 | 0.05           | 9.25E-08 | 0.34         | 9.97E-01 |
| Breast cancer     | 2_MACS_peak_23111_lociStitched  | RBMS3      | 3    | 29321550  | 29334286  | 0.06           | 9.30E-06 | 0.65         | 9.97E-01 |
| Breast cancer     | 2_MACS_peak_23764_lociStitched  | FOXP1      | 3    | 71104592  | 71120542  | 0.01           | 4.33E-01 | 0.28         | 9.97E-01 |
| Breast cancer     | 1_MACS_peak_27137_lociStitched  | IRX4       | 5    | 1881509   | 1890183   | 0.08           | 1.20E-04 | 0.67         | 9.97E-01 |
| Breast cancer     | 3_MACS_peak_27146_lociStitched  | IRX2       | 5    | 2739262   | 2759651   | 0.03           | 4.58E-02 | 0.60         | 9.97E-01 |
| Breast cancer     | 1_MACS_peak_28648_lociStitched  | NR3C1      | 5    | 142773722 | 142785691 | 0.09           | 8.80E-12 | 0.63         | 9.97E-01 |
| Breast cancer     | 1_MACS_peak_31912_lociStitched  | INHBA      | 7    | 41734099  | 41745805  | 0.06           | 1.94E-06 | 0.34         | 9.97E-01 |
| Breast cancer     | 6_MACS_peak_5342_lociStitched   | FAM53B     | 10   | 126406768 | 126435377 | 0.01           | 1.84E-01 | 0.26         | 9.97E-01 |
| Breast cancer     | 1_MACS_peak_5527_lociStitched   | PRKCDBP    | 11   | 6339234   | 6344196   | 0.10           | 1.04E-08 | 0.32         | 9.97E-01 |
| Breast cancer     | 3_MACS_peak_7389_lociStitched   | TNFRSF1A   | 12   | 6432600   | 6452223   | 0.01           | 5.72E-03 | 0.29         | 9.97E-01 |
| Breast cancer     | 2_MACS_peak_8659_lociStitched   | BTG1       | 12   | 92527863  | 92539838  | 0.03           | 1.27E-05 | 0.35         | 9.97E-01 |
| Breast cancer     | 4_MACS_peak_10930_lociStitched  | ELMSAN1    | 14   | 74207241  | 74227902  | -0.01          | 7.93E-02 | 0.36         | 9.97E-01 |
| Breast cancer     | 1_MACS_peak_11720_lociStitched  | GABPB1     | 15   | 50644604  | 50649357  | 0.00           | 4.10E-02 | 0.29         | 2.33E-01 |
| Breast cancer     | MACS_peak_12476                 | CHD2       | 15   | 93425946  | 93432559  | 0.01           | 2.01E-03 | 0.31         | 9.97E-01 |
| Breast cancer     | 3_MACS_peak_17254_lociStitched  | CIC        | 19   | 42771661  | 42788152  | 0.03           | 5.75E-12 | 0.27         | 9.97E-01 |
| Breast cancer     | 1_MACS_peak_21219_lociStitched  | RBM39      | 20   | 34326330  | 34331841  | 0.00           | 5.85E-04 | 0.30         | 9.97E-01 |
| Breast cancer     | 2_MACS_peak_21515_lociStitched  | TSHZ2      | 20   | 51581498  | 51597746  | 0.06           | 7.91E-08 | 0.37         | 9.97E-01 |
| Breast cancer     | 1_MACS_peak_21859_lociStitched  | RUNX1      | 21   | 36252652  | 36264673  | 0.04           | 2.53E-03 | 0.42         | 9.97E-01 |
| Breast cancer     | MACS_peak_22783                 | MIRLET7    | 22   | 46467114  | 46488203  | 0.16           | 2.61E-07 | 0.61         | 2.33E-01 |
| Colorectal cancer | 3_MACS_peak_30801_lociStitched  | PITX1      | 5    | 134361067 | 134376085 | 0.09           | 2.24E-06 | 0.29         | 8.18E-01 |
| Glioblastoma      | 13_MACS_peak_22858_lociStitched | BIN1       | 2    | 127806748 | 127912517 | 0.06           | 1.66E-02 | 0.32         | 5.54E-01 |
| Glioblastoma      | 15_MACS_peak_22991_lociStitched | ZEB2       | 2    | 145129528 | 145283099 | 0.00           | 8.77E-01 | 0.34         | 9.23E-01 |
| Glioblastoma      | 6_MACS_peak_23868_lociStitched  | PTMA       | 2    | 232526039 | 232554844 | 0.07           | 6.33E-04 | 0.29         | 9.23E-01 |
| Glioblastoma      | 8_MACS_peak_29107_lociStitched  | SOX2       | 3    | 181403893 | 181455295 | 0.01           | 8.20E-01 | 0.36         | 4.22E-01 |
| Glioblastoma      | 1_MACS_peak_31287_lociStitched  | SLC1A3     | 5    | 36599886  | 36615091  | 0.00           | 8.95E-01 | 0.33         | 3.74E-02 |
| Glioblastoma      | MACS_peak_32260                 | SEPT8      | 5    | 132105879 | 132116081 | 0.05           | 1.29E-02 | 0.27         | 9.71E-01 |
| Glioblastoma      | 2_MACS_peak_34748_lociStitched  | SGK1       | 6    | 134488737 | 134505092 | 0.06           | 2.19E-02 | 0.38         | 9.73E-01 |
| Glioblastoma      | 12_MACS_peak_35205_lociStitched | QKI        | 6    | 163815822 | 163882069 | 0.01           | 8.17E-01 | 0.65         | 9.71E-01 |
| Glioblastoma      | 5_MACS_peak_40731_lociStitched  | RALGDS     | 9    | 135976307 | 136024639 | 0.02           | 1.30E-01 | 0.26         | 9.23E-01 |
| Glioblastoma      | 1_MACS_peak_40902_lociStitched  | TPRN       | 9    | 140081775 | 140094696 | 0.05           | 3.59E-03 | 0.35         | 9.23E-01 |
| Glioblastoma      | 11_MACS_peak_5386_lociStitched  | ZCCHC24    | 10   | 81137824  | 81212605  | 0.04           | 6.60E-03 | 0.38         | 9.23E-01 |
| Glioblastoma      | 3_MACS_peak_5703_lociStitched   | LZTS2      | 10   | 102752997 | 102775915 | 0.04           | 3.35E-02 | 0.28         | 4.22E-01 |
| Glioblastoma      | 3_MACS_peak_7435_lociStitched   | CARNS1     | 11   | 67173218  | 67188540  | 0.07           | 5.40E-05 | 0.38         | 9.23E-01 |
| Glioblastoma      | MACS_peak_9242                  | AC004466.1 | 12   | 48167031  | 48182319  | 0.00           | 7.19E-01 | 0.35         | 9.23E-01 |
| Glioblastoma      | 3_MACS_peak_11368_lociStitched  | PCDH9      | 13   | 67782754  | 67806323  | 0.01           | 8.20E-01 | 0.45         | 5.54E-01 |

|                              |                                |            |    |           |           |       |          |      |          |
|------------------------------|--------------------------------|------------|----|-----------|-----------|-------|----------|------|----------|
| Glioblastoma                 | 1_MACS_peak_12563_lociStitched | GSTZ1      | 14 | 77765872  | 77789479  | 0.02  | 2.56E-01 | 0.28 | 9.58E-01 |
| Glioblastoma                 | 4_MACS_peak_13804_lociStitched | OAZ2       | 15 | 64974641  | 64996542  | 0.02  | 2.43E-02 | 0.30 | 9.23E-01 |
| Glioblastoma                 | MACS_peak_17165                | THRA       | 17 | 38216903  | 38234316  | 0.01  | 7.56E-01 | 0.36 | 9.23E-01 |
| Glioblastoma                 | 4_MACS_peak_17901_lociStitched | KCNJ2      | 17 | 68152783  | 68183190  | 0.00  | 7.48E-01 | 0.29 | 9.23E-01 |
| Glioblastoma                 | 5_MACS_peak_18355_lociStitched | BAHCC1     | 17 | 79345155  | 79376776  | -0.01 | 2.32E-01 | 0.27 | 9.23E-01 |
| Glioblastoma                 | 3_MACS_peak_26411_lociStitched | CDC42EP1   | 22 | 37940770  | 37968154  | 0.06  | 5.93E-04 | 0.32 | 9.23E-01 |
| Lung adenocarcinoma          | MACS_peak_3232                 | TXNIP      | 1  | 145434374 | 145443479 | 0.00  | 8.52E-01 | 0.48 | 5.29E-01 |
| Lung adenocarcinoma          | 3_MACS_peak_30019_lociStitched | MEIS1      | 2  | 66659175  | 66674430  | 0.14  | 4.25E-18 | 0.45 | no CNV   |
| Lung adenocarcinoma          | 2_MACS_peak_39322_lociStitched | GATA2      | 3  | 128199015 | 128216666 | 0.08  | 2.96E-08 | 0.53 | no CNV   |
| Lung adenocarcinoma          | 4_MACS_peak_42669_lociStitched | HAND2      | 4  | 174427206 | 174460857 | 0.12  | 3.22E-12 | 0.48 | no CNV   |
| Lung adenocarcinoma          | 5_MACS_peak_42987_lociStitched | IRX2       | 5  | 2738590   | 2759482   | 0.07  | 1.60E-05 | 0.74 | 5.29E-01 |
| Lung adenocarcinoma          | 5_MACS_peak_45552_lociStitched | NKX2-5     | 5  | 172655376 | 172676296 | 0.09  | 4.62E-08 | 0.58 | no CNV   |
| Lung adenocarcinoma          | MACS_peak_54700                | CREB3      | 9  | 35726029  | 35733751  | -0.01 | 2.73E-02 | 0.31 | NA       |
| Lung adenocarcinoma          | 3_MACS_peak_7162_lociStitched  | ZNF503-AS2 | 10 | 77154286  | 77170840  | 0.02  | 2.08E-02 | 0.26 | no CNV   |
| Lung adenocarcinoma          | MACS_peak_17492                | CRIP2      | 14 | 105938037 | 105944737 | 0.00  | 6.84E-01 | 0.34 | no CNV   |
| Lung adenocarcinoma          | MACS_peak_22262                | ZBTB4      | 17 | 7378645   | 7384073   | 0.01  | 1.38E-01 | 0.36 | no CNV   |
| Lung adenocarcinoma          | MACS_peak_36631                | MIRLET7    | 22 | 46445515  | 46454339  | 0.02  | 1.82E-01 | 0.29 | NA       |
| Lung adenocarcinoma          | MACS_peak_36635                | MIRLET7    | 22 | 46464333  | 46478321  | 0.03  | 1.82E-02 | 0.27 | NA       |
| Lung squamous cell carcinoma | MACS_peak_3232                 | TXNIP      | 1  | 145434374 | 145443479 | 0.02  | 1.32E-01 | 0.48 | no CNV   |
| Lung squamous cell carcinoma | 2_MACS_peak_28599_lociStitched | ID2        | 2  | 8815972   | 8826211   | 0.00  | 5.29E-01 | 0.59 | 9.86E-07 |
| Lung squamous cell carcinoma | 3_MACS_peak_30019_lociStitched | MEIS1      | 2  | 66659175  | 66674430  | 0.11  | 4.14E-13 | 0.52 | 1.91E-01 |
| Lung squamous cell carcinoma | 3_MACS_peak_32032_lociStitched | CLK1       | 2  | 201724772 | 201732443 | 0.02  | 5.41E-06 | 0.35 | 4.78E-02 |
| Lung squamous cell carcinoma | 2_MACS_peak_37947_lociStitched | SHISA5     | 3  | 48504418  | 48515502  | 0.01  | 7.22E-01 | 0.26 | 2.92E-01 |
| Lung squamous cell carcinoma | 2_MACS_peak_39322_lociStitched | GATA2      | 3  | 128199015 | 128216666 | 0.08  | 5.59E-07 | 0.63 | 1.91E-01 |
| Lung squamous cell carcinoma | 4_MACS_peak_42669_lociStitched | HAND2      | 4  | 174427206 | 174460857 | 0.13  | 6.38E-14 | 0.67 | NA       |
| Lung squamous cell carcinoma | 5_MACS_peak_42987_lociStitched | IRX2       | 5  | 2738590   | 2759482   | 0.15  | 6.38E-14 | 0.63 | NA       |
| Lung squamous cell carcinoma | 4_MACS_peak_43416_lociStitched | ANXA2R     | 5  | 42990572  | 43020949  | 0.09  | 2.87E-07 | 0.26 | 2.79E-02 |
| Lung squamous cell carcinoma | MACS_peak_54700                | CREB3      | 9  | 35726029  | 35733751  | -0.02 | 4.14E-03 | 0.32 | 1.15E-01 |
| Lung squamous cell carcinoma | 3_MACS_peak_7162_lociStitched  | ZNF503-AS2 | 10 | 77154286  | 77170840  | 0.04  | 1.91E-05 | 0.38 | 1.91E-01 |
| Lung squamous cell carcinoma | 1_MACS_peak_11040_lociStitched | DDX6       | 11 | 118659939 | 118664216 | 0.01  | 5.77E-01 | 0.38 | 3.75E-01 |
| Lung squamous cell carcinoma | MACS_peak_11710                | TNFRSF1A   | 12 | 6441703   | 6453465   | 0.02  | 1.82E-01 | 0.39 | NA       |
| Lung squamous cell carcinoma | MACS_peak_11762                | ATN1       | 12 | 7032586   | 7039696   | 0.00  | 5.35E-01 | 0.34 | NA       |
| Lung squamous cell carcinoma | 5_MACS_peak_13097_lociStitched | BTG1       | 12 | 92526891  | 92540701  | 0.00  | 9.18E-01 | 0.43 | NA       |
| Lung squamous cell carcinoma | 6_MACS_peak_13707_lociStitched | TBX3       | 12 | 115105978 | 115131359 | 0.08  | 3.09E-10 | 0.36 | NA       |
| Lung squamous cell carcinoma | 7_MACS_peak_15952_lociStitched | NKX2-1     | 14 | 36971679  | 36995027  | 0.13  | 7.34E-12 | 0.49 | 2.92E-01 |
| Lung squamous cell carcinoma | MACS_peak_17492                | CRIP2      | 14 | 105938037 | 105944737 | 0.00  | 4.53E-01 | 0.32 | no CNV   |
| Lung squamous cell carcinoma | 4_MACS_peak_20804_lociStitched | IRX5       | 16 | 54956715  | 54973307  | 0.09  | 1.03E-11 | 0.32 | NA       |
| Lung squamous cell carcinoma | MACS_peak_22262                | ZBTB4      | 17 | 7378645   | 7384073   | 0.02  | 2.86E-03 | 0.37 | NA       |
| Lung squamous cell carcinoma | MACS_peak_22267                | SENP3      | 17 | 7459853   | 7466333   | 0.01  | 1.78E-01 | 0.26 | NA       |

|                              |                                |            |    |           |           |       |          |      |          |
|------------------------------|--------------------------------|------------|----|-----------|-----------|-------|----------|------|----------|
| Lung squamous cell carcinoma | MACS_peak_23136                | THRA       | 17 | 38222943  | 38234141  | 0.06  | 3.97E-05 | 0.35 | no CNV   |
| Lung squamous cell carcinoma | MACS_peak_36631                | MIRLET7    | 22 | 46445515  | 46454339  | 0.01  | 4.99E-01 | 0.26 | NA       |
| Lung squamous cell carcinoma | MACS_peak_36635                | MIRLET7    | 22 | 46464333  | 46478321  | 0.03  | 3.82E-02 | 0.32 | NA       |
| Small cell lung cancer       | MACS_peak_42                   | VWA1       | 1  | 1364851   | 1372426   | 0.02  | 4.71E-01 | 0.32 | 9.12E-01 |
| Small cell lung cancer       | MACS_peak_3232                 | TXNIP      | 1  | 145434374 | 145443479 | 0.01  | 5.20E-01 | 0.29 | 2.81E-01 |
| Small cell lung cancer       | MACS_peak_3436                 | S100A2     | 1  | 153537691 | 153541885 | -0.03 | 3.10E-02 | 0.32 | 4.02E-01 |
| Small cell lung cancer       | 3_MACS_peak_30019_lociStitched | MEIS1      | 2  | 66659175  | 66674430  | 0.19  | 1.70E-24 | 0.45 | 9.12E-01 |
| Small cell lung cancer       | 3_MACS_peak_32032_lociStitched | CLK1       | 2  | 201724772 | 201732443 | 0.01  | 2.01E-03 | 0.35 | 4.52E-01 |
| Small cell lung cancer       | 2_MACS_peak_39322_lociStitched | GATA2      | 3  | 128199015 | 128216666 | 0.09  | 8.82E-07 | 0.50 | 9.12E-01 |
| Small cell lung cancer       | 4_MACS_peak_42669_lociStitched | HAND2      | 4  | 174427206 | 174460857 | 0.17  | 1.74E-15 | 0.50 | 9.12E-01 |
| Small cell lung cancer       | 5_MACS_peak_42987_lociStitched | IRX2       | 5  | 2738590   | 2759482   | 0.13  | 3.90E-10 | 0.35 | 9.12E-01 |
| Small cell lung cancer       | 5_MACS_peak_45552_lociStitched | NKX2-5     | 5  | 172655376 | 172676296 | 0.14  | 2.02E-11 | 0.26 | 7.99E-01 |
| Small cell lung cancer       | 2_MACS_peak_46644_lociStitched | NRM        | 6  | 30646634  | 30659820  | 0.04  | 8.43E-04 | 0.39 | 1.42E-02 |
| Small cell lung cancer       | 2_MACS_peak_46715_lociStitched | CLIC1      | 6  | 31694582  | 31706840  | 0.02  | 7.73E-02 | 0.30 | 8.38E-01 |
| Small cell lung cancer       | 1_MACS_peak_49158_lociStitched | MAFK       | 7  | 1569896   | 1580027   | 0.01  | 6.46E-01 | 0.28 | 9.12E-01 |
| Small cell lung cancer       | 4_MACS_peak_54476_lociStitched | NFIB       | 9  | 14302438  | 14323420  | 0.01  | 3.41E-01 | 0.28 | 1.57E-01 |
| Small cell lung cancer       | 4_MACS_peak_54483_lociStitched | NFIB       | 9  | 14340900  | 14353877  | 0.06  | 7.73E-02 | 0.25 | 9.12E-01 |
| Small cell lung cancer       | MACS_peak_54700                | CREB3      | 9  | 35726029  | 35733751  | -0.01 | 4.66E-01 | 0.36 | 9.12E-01 |
| Small cell lung cancer       | 3_MACS_peak_7162_lociStitched  | ZNF503-AS2 | 10 | 77154286  | 77170840  | 0.04  | 7.31E-05 | 0.29 | 7.99E-01 |
| Small cell lung cancer       | MACS_peak_7364                 | C10orf116  | 10 | 88726022  | 88733482  | 0.01  | 6.46E-01 | 0.27 | 2.39E-01 |
| Small cell lung cancer       | MACS_peak_9994                 | FRMD8      | 11 | 65182856  | 65196355  | 0.02  | 1.82E-01 | 0.76 | 4.52E-01 |
| Small cell lung cancer       | MACS_peak_10139                | TCIRG1     | 11 | 67803279  | 67809641  | 0.01  | 6.09E-01 | 0.37 | 1.57E-01 |
| Small cell lung cancer       | 1_MACS_peak_11040_lociStitched | DDX6       | 11 | 118659939 | 118664216 | 0.01  | 1.50E-01 | 0.35 | 9.12E-01 |
| Small cell lung cancer       | 2_MACS_peak_11044_lociStitched | UPK2       | 11 | 118777304 | 118801687 | 0.00  | 8.56E-01 | 0.46 | 6.46E-01 |
| Small cell lung cancer       | MACS_peak_11710                | TNFRSF1A   | 12 | 6441703   | 6453465   | 0.02  | 2.30E-02 | 0.61 | 5.80E-01 |
| Small cell lung cancer       | 5_MACS_peak_13097_lociStitched | BTG1       | 12 | 92526891  | 92540701  | 0.00  | 9.62E-01 | 0.38 | 9.81E-01 |
| Small cell lung cancer       | 9_MACS_peak_13696_lociStitched | TBX5       | 12 | 114806250 | 114852976 | 0.14  | 6.63E-10 | 0.43 | 7.99E-01 |
| Small cell lung cancer       | 6_MACS_peak_13707_lociStitched | TBX3       | 12 | 115105978 | 115131359 | 0.07  | 9.04E-07 | 0.28 | 9.12E-01 |
| Small cell lung cancer       | 7_MACS_peak_15952_lociStitched | NKX2-1     | 14 | 36971679  | 36995027  | 0.09  | 2.49E-05 | 0.69 | 9.12E-01 |
| Small cell lung cancer       | MACS_peak_17492                | CRIP2      | 14 | 105938037 | 105944737 | -0.01 | 5.23E-01 | 0.47 | 9.81E-01 |
| Small cell lung cancer       | 4_MACS_peak_20804_lociStitched | IRX5       | 16 | 54956715  | 54973307  | 0.08  | 2.07E-09 | 0.40 | 9.12E-01 |
| Small cell lung cancer       | 1_MACS_peak_20826_lociStitched | MT2A       | 16 | 56638742  | 56646907  | 0.04  | 3.34E-02 | 0.25 | 9.12E-01 |
| Small cell lung cancer       | MACS_peak_22262                | ZBTB4      | 17 | 7378645   | 7384073   | 0.05  | 6.28E-07 | 0.36 | 7.24E-01 |
| Small cell lung cancer       | MACS_peak_23136                | THRA       | 17 | 38222943  | 38234141  | 0.03  | 1.15E-01 | 0.48 | 2.39E-01 |
| Small cell lung cancer       | 1_MACS_peak_24752_lociStitched | ACTG1      | 17 | 79475627  | 79487805  | -0.01 | 9.09E-02 | 0.36 | 9.12E-01 |
| Small cell lung cancer       | 3_MACS_peak_24980_lociStitched | DLGAP1     | 18 | 3591992   | 3606653   | -0.01 | 6.37E-01 | 0.31 | 3.82E-01 |
| Small cell lung cancer       | MACS_peak_26165                | MIDN       | 19 | 1247145   | 1256325   | 0.02  | 9.48E-03 | 0.30 | no CNV   |
| Small cell lung cancer       | MACS_peak_26166                | CIRBP      | 19 | 1256391   | 1263727   | -0.01 | 5.54E-01 | 0.34 | NA       |
| Small cell lung cancer       | MACS_peak_27682                | ITPKC      | 19 | 41219787  | 41228823  | -0.02 | 1.21E-02 | 0.29 | no CNV   |

|                        |                                |         |    |          |          |       |          |      |          |
|------------------------|--------------------------------|---------|----|----------|----------|-------|----------|------|----------|
| Small cell lung cancer | 6_MACS_peak_33435_lociStitched | FOXA2   | 20 | 22536539 | 22565230 | 0.09  | 5.88E-06 | 0.51 | 8.38E-01 |
| Small cell lung cancer | MACS_peak_36245                | CSNK1E  | 22 | 38708087 | 38715695 | 0.00  | 8.64E-01 | 0.31 | 9.81E-01 |
| Small cell lung cancer | MACS_peak_36631                | MIRLET7 | 22 | 46445515 | 46454339 | -0.02 | 2.34E-01 | 0.45 | 9.12E-01 |
| Small cell lung cancer | MACS_peak_36635                | MIRLET7 | 22 | 46464333 | 46478321 | -0.01 | 7.51E-01 | 0.47 | 7.88E-01 |



**Supplementary Table 8:** Hypomethylated cancer-related super-enhancers in colorectal cancer cells.

| Enhancer |           |           |                                  | % DNA hypomethylation |        |       | 450K (AVR) |        |       | CNV    | CNV  | #TFBS |       |
|----------|-----------|-----------|----------------------------------|-----------------------|--------|-------|------------|--------|-------|--------|------|-------|-------|
| Chr.     | Start     | End       | Enhancer ID (Hnisz et al., 2013) | Gene symbol           | Normal | Tumor | Delta      | Normal | Tumor | -log10 | FDR  | WGBS  | FOXQ1 |
| 1        | 1079431   | 1101911   | 7_MACS_peak_34_lociStitched      | MIR200b               | 0.21   | 0.51  | -0.31      | 0.56   | 0.36  | -10.82 | NA   | loss  | 18    |
| 1        | 1365609   | 1378027   | 3_MACS_peak_73_lociStitched      | VWA1                  | 0.28   | 0.75  | -0.47      | NA     | NA    | NA     | NA   | loss  | 0     |
| 1        | 45270646  | 45276647  | MACS_peak_1200                   | PLK3                  | 0.18   | 0.52  | -0.34      | 0.22   | 0.34  | 3.63   | NA   | NA    | 7     |
| 2        | 70310047  | 70317059  | 2_MACS_peak_15169_lociStitched   | PCBP1                 | 0.54   | 0.95  | -0.40      | 0.54   | 0.40  | -9.97  | NA   | NA    | 0     |
| 3        | 49934498  | 49944642  | 2_MACS_peak_18795_lociStitched   | MST1R                 | 0.09   | 0.57  | -0.48      | 0.40   | 0.22  | -8.11  | 0.79 | NA    | 7     |
| 7        | 130563226 | 130576863 | MACS_peak_24364                  | MIR29a/b              | 0.00   | 0.27  | -0.27      | 0.74   | 0.36  | -8.83  | NA   | NA    | 7     |
| 7        | 130577071 | 130604705 | MACS_peak_24365                  | MIR29a/b              | 0.21   | 0.95  | -0.74      | 0.55   | 0.31  | -5.29  | 0.71 | NA    | 11    |
| 8        | 128744519 | 128756323 | 2_MACS_peak_25390_lociStitched   | MYC                   | 0.53   | 0.83  | -0.30      | 0.46   | 0.31  | -2.65  | 0.71 | NA    | 5     |
| 10       | 101664881 | 101695667 | 4_MACS_peak_3541_lociStitched    | DNMBP                 | 0.02   | 0.30  | -0.28      | NA     | NA    | NA     | 0.71 | NA    | 22    |
| 11       | 309864    | 321533    | 2_MACS_peak_3964_lociStitched    | IFITM3                | 0.69   | 0.94  | -0.25      | 0.40   | 0.39  | -0.20  | NA   | NA    | 2     |
| 12       | 7069196   | 7075991   | MACS_peak_5450                   | MIR200c               | 0.39   | 0.73  | -0.34      | 0.68   | 0.31  | -9.54  | NA   | NA    | 4     |
| 12       | 13022807  | 13063891  | 9_MACS_peak_5515_lociStitched    | GPRC5A                | 0.05   | 0.38  | -0.33      | 0.44   | 0.44  | -0.11  | NA   | NA    | 35    |
| 14       | 69245317  | 69265057  | 3_MACS_peak_7661_lociStitched    | ZFP36L1               | 0.47   | 0.80  | -0.33      | NA     | NA    | NA     | 0.64 | NA    | 9     |
| 14       | 105552749 | 105561461 | 1_MACS_peak_8032_lociStitched    | GPR123                | 0.53   | 0.81  | -0.28      | NA     | NA    | NA     | NA   | loss  | 4     |
| 16       | 1137094   | 1142491   | MACS_peak_8969                   | C1QTNF8               | 0.41   | 0.71  | -0.30      | NA     | NA    | NA     | NA   | loss  | 6     |
| 16       | 89622859  | 89633240  | MACS_peak_10212                  | SNORD68               | 0.39   | 0.67  | -0.28      | 0.51   | 0.51  | -0.38  | NA   | NA    | 6     |
| 17       | 56428488  | 56496439  | 10_MACS_peak_11452_lociStitched  | RNF43                 | 0.11   | 0.58  | -0.47      | 0.52   | 0.44  | -5.29  | NA   | NA    | 51    |
| 17       | 75275055  | 75285678  | 1_MACS_peak_11905_lociStitched   | SEPT9                 | 0.27   | 0.73  | -0.46      | NA     | NA    | NA     | NA   | NA    | 5     |
| 17       | 79301530  | 79306049  | MACS_peak_12086                  | TMEM105               | 0.24   | 0.56  | -0.31      | 0.52   | 0.60  | 1.54   | NA   | loss  | 0     |
| 20       | 62305260  | 62334757  | 6_MACS_peak_17235_lociStitched   | ARFRP1                | 0.11   | 0.37  | -0.27      | 0.59   | 0.19  | -6.28  | 0.71 | loss  | 15    |
| 22       | 38138277  | 38150317  | MACS_peak_18004                  | TRIOBP                | 0.20   | 0.45  | -0.25      | NA     | NA    | NA     | 0.71 | NA    | 8     |
| 22       | 38176901  | 38182015  | MACS_peak_18012                  | PDCL3                 | 0.22   | 0.60  | -0.38      | 0.64   | 0.31  | -6.46  | NA   | NA    | 3     |
| 22       | 46464429  | 46478530  | MACS_peak_18258                  | MIRLET7               | 0.53   | 0.99  | -0.46      | NA     | NA    | NA     | NA   | NA    | 3     |

**Supplementary Table 9:** Large hypomethylated regions in primary and metastatic colorectal cancer samples.

| Sample type   | Chr. | Start     | End       | Size (bp) | Meth. level | Gene symbol  | Distance TSS | % HMR normal colon |
|---------------|------|-----------|-----------|-----------|-------------|--------------|--------------|--------------------|
| Primary tumor | 1    | 218336382 | 218349940 | 13558     | 0.09        | TGFB2        | 168736       | 0.28               |
| Primary tumor | 13   | 73628949  | 73641647  | 12698     | 0.15        | KLF5         | 0            | 0.30               |
| Primary tumor | 9    | 74373398  | 74385279  | 11881     | 0.10        | TMEM2        | 0            | 0.28               |
| Primary tumor | 2    | 91663698  | 91675203  | 11505     | 0.10        | IGKV1OR2-118 | 3693         | 0.46               |
| Primary tumor | 8    | 117884649 | 117895539 | 10890     | 0.13        | RAD21        | 0            | 0.25               |
| Primary tumor | 2    | 90448882  | 90459317  | 10435     | 0.09        | AC233263.3   | 53454        | 0.19               |
| Primary tumor | 21   | 34437234  | 34447500  | 10266     | 0.19        | OLIG1        | 0            | 0.36               |
| Primary tumor | 5    | 127414083 | 127424041 | 9958      | 0.06        | SLC12A2      | 0            | 0.36               |
| Primary tumor | 1    | 207921099 | 207930539 | 9440      | 0.13        | CD46         | 0            | 0.20               |
| Primary tumor | 1    | 203289774 | 203299097 | 9323      | 0.16        | U6           | 1547         | 0.40               |
| Primary tumor | 20   | 25227101  | 25236365  | 9264      | 0.14        | PYGB         | 0            | 0.31               |
| Primary tumor | 2    | 173291608 | 173300419 | 8811      | 0.12        | ITGA6        | 0            | 0.42               |
| Primary tumor | 22   | 37410887  | 37419122  | 8235      | 0.19        | MPST         | 0            | 0.23               |
| Primary tumor | 11   | 46933497  | 46941707  | 8210      | 0.11        | LRP4         | 0            | 0.39               |
| Primary tumor | 15   | 63795181  | 63803381  | 8200      | 0.04        | USP3         | 0            | 0.47               |
| Primary tumor | 21   | 33244343  | 33252482  | 8139      | 0.09        | HUNK         | 0            | 0.43               |
| Primary tumor | 18   | 55463636  | 55471500  | 7864      | 0.13        | ATP8B1       | 0            | 0.32               |
| Primary tumor | 2    | 230577345 | 230585201 | 7856      | 0.11        | DNER         | 0            | 0.36               |
| Primary tumor | 10   | 32338334  | 32346117  | 7783      | 0.12        | KIF5B        | 0            | 0.45               |
| Primary tumor | 6    | 124122411 | 124130163 | 7752      | 0.18        | NKAIN2       | 0            | 0.42               |
| Primary tumor | 12   | 33044638  | 33052291  | 7653      | 0.13        | PKP2         | 0            | 0.30               |
| Primary tumor | 5    | 94615687  | 94623331  | 7644      | 0.11        | MCTP1        | 0            | 0.39               |
| Primary tumor | 1    | 207222956 | 207230560 | 7604      | 0.13        | PFKFB2       | 0            | 0.45               |
| Primary tumor | 6    | 128835158 | 128842574 | 7416      | 0.06        | PTPRK        | 0            | 0.39               |
| Primary tumor | 7    | 17337977  | 17345308  | 7331      | 0.07        | AHR          | 0            | 0.32               |
| Primary tumor | 14   | 55591597  | 55598891  | 7294      | 0.14        | LGALS3       | 0            | 0.26               |
| Metastasis    | 3    | 41231323  | 41265376  | 34053     | 0.14        | CTNNB1       | 0            | 0.15               |
| Metastasis    | 5    | 127414053 | 127440949 | 26896     | 0.10        | SLC12A2      | 0            | 0.13               |
| Metastasis    | 22   | 46459859  | 46480180  | 20321     | 0.14        | MIRLET7      | 0            | 0.43               |
| Metastasis    | 9    | 29192909  | 29213215  | 20306     | 0.18        | LINGO2       | 41208        | 0.20               |
| Metastasis    | 5    | 94614719  | 94634334  | 19615     | 0.17        | MCTP1        | 0            | 0.15               |
| Metastasis    | 21   | 40174290  | 40193387  | 19097     | 0.18        | ETS2         | 0            | 0.46               |
| Metastasis    | 17   | 63540803  | 63558867  | 18064     | 0.12        | AXIN2        | 0            | 0.35               |
| Metastasis    | 2    | 90442156  | 90460214  | 18058     | 0.08        | AC233263.3   | 52557        | 0.27               |
| Metastasis    | 3    | 87025252  | 87041710  | 16458     | 0.19        | VGLL3        | 0            | 0.10               |

|            |    |           |           |       |      |               |        |      |
|------------|----|-----------|-----------|-------|------|---------------|--------|------|
| Metastasis | 4  | 75229835  | 75245790  | 15955 | 0.20 | EREG          | 0      | 0.20 |
| Metastasis | 2  | 91667887  | 91682638  | 14751 | 0.08 | IGKV1OR2-118  | 0      | 0.30 |
| Metastasis | 1  | 218336537 | 218350719 | 14182 | 0.09 | TGFB2         | 167958 | 0.26 |
| Metastasis | 14 | 94639297  | 94652604  | 13307 | 0.16 | PPP4R4        | 0      | 0.31 |
| Metastasis | 9  | 74372950  | 74385279  | 12329 | 0.07 | TMEM2         | 0      | 0.27 |
| Metastasis | 12 | 89739454  | 89751618  | 12164 | 0.05 | DUSP6         | 0      | 0.43 |
| Metastasis | 13 | 73628491  | 73640649  | 12158 | 0.09 | KLF5          | 0      | 0.31 |
| Metastasis | 17 | 56404994  | 56417144  | 12150 | 0.10 | MIR4736       | 0      | 0.40 |
| Metastasis | 21 | 47062453  | 47074317  | 11864 | 0.14 | PCBP3         | 0      | 0.18 |
| Metastasis | 1  | 207919635 | 207930507 | 10872 | 0.09 | CD46          | 0      | 0.17 |
| Metastasis | 22 | 46433823  | 46444602  | 10779 | 0.18 | MIRLET7       | 0      | 0.16 |
| Metastasis | 2  | 132767266 | 132777949 | 10683 | 0.17 | RP1-156L9.1   | 15532  | 0.07 |
| Metastasis | 5  | 88172728  | 88183358  | 10630 | 0.18 | CTC-454M9.1   | 0      | 0.49 |
| Metastasis | 11 | 46931142  | 46941707  | 10565 | 0.10 | LRP4          | 0      | 0.30 |
| Metastasis | 11 | 25440840  | 25450991  | 10151 | 0.18 | AC015820.1    | 107833 | 0.00 |
| Metastasis | 8  | 106324990 | 106335123 | 10133 | 0.12 | ZFPM2         | 0      | 0.26 |
| Metastasis | 14 | 66972981  | 66982851  | 9870  | 0.08 | GPHN          | 0      | 0.29 |
| Metastasis | 1  | 142928205 | 142937914 | 9709  | 0.20 | RP11-423O2.7  | 18802  | 0.00 |
| Metastasis | 21 | 33243902  | 33253577  | 9675  | 0.11 | HUNK          | 0      | 0.36 |
| Metastasis | 21 | 10105053  | 10114480  | 9427  | 0.20 | CR381653.1    | 66688  | 0.16 |
| Metastasis | 3  | 79060095  | 79069497  | 9402  | 0.09 | ROBO1         | 0      | 0.43 |
| Metastasis | 1  | 203289774 | 203299097 | 9323  | 0.13 | U6            | 1547   | 0.40 |
| Metastasis | 1  | 11530768  | 11540086  | 9318  | 0.12 | PTCHD2        | 0      | 0.18 |
| Metastasis | 2  | 41704857  | 41713858  | 9001  | 0.12 | AC010739.1    | 109668 | 0.00 |
| Metastasis | 1  | 37500826  | 37509794  | 8968  | 0.19 | GRIK3         | 1096   | 0.46 |
| Metastasis | 14 | 88781784  | 88790680  | 8896  | 0.16 | KCNK10        | 0      | 0.27 |
| Metastasis | 1  | 151960764 | 151969653 | 8889  | 0.10 | AL591893.1    | 0      | 0.50 |
| Metastasis | 6  | 69935822  | 69944658  | 8836  | 0.18 | BAI3          | 0      | 0.13 |
| Metastasis | 7  | 102787637 | 102796362 | 8725  | 0.15 | RP11-401L13.5 | 0      | 0.20 |
| Metastasis | 2  | 106007479 | 106016181 | 8702  | 0.18 | FHL2          | 0      | 0.15 |
| Metastasis | 7  | 26191459  | 26200010  | 8551  | 0.08 | NFE2L3        | 0      | 0.37 |
| Metastasis | 2  | 230577164 | 230585636 | 8472  | 0.11 | DNER          | 0      | 0.34 |
| Metastasis | 13 | 67803752  | 67812201  | 8449  | 0.13 | PCDH9         | 0      | 0.28 |
| Metastasis | 3  | 89155675  | 89164093  | 8418  | 0.13 | EPHA3         | 0      | 0.39 |
| Metastasis | 13 | 78265037  | 78273411  | 8374  | 0.04 | MIR3665       | 0      | 0.45 |
| Metastasis | 18 | 53249062  | 53257434  | 8372  | 0.10 | TCF4          | 0      | 0.38 |
| Metastasis | 9  | 177326    | 185696    | 8370  | 0.16 | CBWD1         | 0      | 0.24 |
| Metastasis | 8  | 92610199  | 92618527  | 8328  | 0.19 | 7SK           | 3006   | 0.29 |
| Metastasis | 15 | 79596231  | 79604549  | 8318  | 0.15 | TMED3         | 0      | 0.19 |

|            |    |           |           |      |      |              |      |      |
|------------|----|-----------|-----------|------|------|--------------|------|------|
| Metastasis | 12 | 33044638  | 33052875  | 8237 | 0.10 | PKP2         | 0    | 0.28 |
| Metastasis | 12 | 89912441  | 89920652  | 8211 | 0.08 | GALNT4       | 0    | 0.31 |
| Metastasis | 20 | 5583918   | 5592121   | 8203 | 0.08 | GPCPD1       | 0    | 0.42 |
| Metastasis | 7  | 30322505  | 30330689  | 8184 | 0.06 | MIR550A1     | 0    | 0.32 |
| Metastasis | 1  | 235092612 | 235100792 | 8180 | 0.15 | RP11-443B7.1 | 0    | 0.31 |
| Metastasis | 14 | 65167106  | 65175127  | 8021 | 0.12 | PLEKHG3      | 0    | 0.39 |
| Metastasis | 10 | 32338291  | 32346311  | 8020 | 0.07 | Y_RNA        | 0    | 0.44 |
| Metastasis | 15 | 63795181  | 63803166  | 7985 | 0.04 | USP3         | 0    | 0.49 |
| Metastasis | 12 | 12937531  | 12945460  | 7929 | 0.13 | APOLD1       | 0    | 0.15 |
| Metastasis | 11 | 94276085  | 94283992  | 7907 | 0.06 | FUT4         | 0    | 0.23 |
| Metastasis | 8  | 117884817 | 117892656 | 7839 | 0.07 | MIR3610      | 0    | 0.32 |
| Metastasis | 3  | 12328878  | 12336686  | 7808 | 0.09 | PPARG        | 0    | 0.44 |
| Metastasis | 5  | 129239340 | 129247107 | 7767 | 0.10 | CHSY3        | 0    | 0.48 |
| Metastasis | 1  | 207222956 | 207230681 | 7725 | 0.10 | PFKFB2       | 0    | 0.45 |
| Metastasis | 7  | 77320936  | 77328644  | 7708 | 0.12 | RSBN1L       | 0    | 0.33 |
| Metastasis | 10 | 11055794  | 11063495  | 7701 | 0.07 | CELF2        | 0    | 0.32 |
| Metastasis | 20 | 31170742  | 31178437  | 7695 | 0.09 | RP11-410N8.4 | 0    | 0.41 |
| Metastasis | 1  | 46595249  | 46602845  | 7596 | 0.08 | RP4-533D7.5  | 0    | 0.42 |
| Metastasis | 2  | 69607934  | 69615506  | 7572 | 0.11 | GFPT1        | 0    | 0.29 |
| Metastasis | 12 | 71832196  | 71839719  | 7523 | 0.05 | LGR5         | 0    | 0.41 |
| Metastasis | 2  | 91995135  | 92002654  | 7519 | 0.05 | AC127391.1   | 3143 | 0.15 |
